# Supplementary material for: Early Chronic Fluoxetine Treatment of Ts65Dn Mice Rescues Synaptic Vesicular Deficits and Prevents Aberrant Proteomic Alterations
Source: MDPI journal article supplement (doi:10.3390/genes15040452), 2024-04-03
Supplement: s1 [file s1]

**Supplementary Table S1 (1A-1F):** Mean  $\pm$  SD and T-Test data for various parameters in euploid versus trisomic mice.

**1A. Fluoxetine Intake:**

| Euploid                |      |   | Ts65Dn                 |      |   |         |
|------------------------|------|---|------------------------|------|---|---------|
| Fluoxetine (mg/kg/day) | SD   | N | Fluoxetine (mg/kg/day) | SD   | N | P Value |
| 8.92                   | 1.35 | 4 | 10.14                  | 1.72 | 5 | 0.29    |

**1B. Average water intake (Euploid vs. Ts65Dn):**

| Euploid                         |      |    | Ts65Dn                          |      |    |         |
|---------------------------------|------|----|---------------------------------|------|----|---------|
| Average Daily Water Intake (mL) | SD   | N  | Average Daily Water Intake (mL) | SD   | N  | P Value |
| 6.13                            | 0.87 | 10 | 5.63                            | 1.06 | 12 | 0.25    |

**1C. Cortical Weight (Treatment vs. Control):**

| Euploid             |      |   |                     |      |   |         | Ts65Dn              |      |   |                     |      |   |         |
|---------------------|------|---|---------------------|------|---|---------|---------------------|------|---|---------------------|------|---|---------|
| Fluoxetine          |      |   | Control             |      |   |         | Fluoxetine          |      |   | Control             |      |   |         |
| Cortical Weight (g) | SD   | N | Cortical Weight (g) | SD   | N | P Value | Cortical Weight (g) | SD   | N | Cortical Weight (g) | SD   | N | P Value |
| 0.19                | 0.04 | 4 | 0.17                | 0.02 | 6 | 0.51    | 0.18                | 0.04 | 5 | 0.17                | 0.04 | 7 | 0.64    |

**1D. Cortical Weight (Euploid vs. Ts65Dn):**

| Fluoxetine          |      |   |                     |      |   |         | Control             |      |   |                     |      |   |         |
|---------------------|------|---|---------------------|------|---|---------|---------------------|------|---|---------------------|------|---|---------|
| Euploid             |      |   | Ts65Dn              |      |   |         | Euploid             |      |   | Ts65Dn              |      |   |         |
| Cortical Weight (g) | SD   | N | Cortical Weight (g) | SD   | N | P Value | Cortical Weight (g) | SD   | N | Cortical Weight (g) | SD   | N | P Value |
| 0.19                | 0.04 | 4 | 0.18                | 0.04 | 5 | 0.75    | 0.17                | 0.02 | 6 | 0.17                | 0.04 | 7 | 0.72    |

**1E. Body Weights (Comparing Treatment vs. Control):**

|            | Euploid    |       |   |            |       |   |         | Ts65Dn     |       |   |            |       |   |         |
|------------|------------|-------|---|------------|-------|---|---------|------------|-------|---|------------|-------|---|---------|
|            | Fluoxetine |       |   | Control    |       |   |         | Fluoxetine |       |   | Control    |       |   |         |
| Age (Days) | Weight (g) | SD    | N | Weight (g) | SD    | N | P Value | Weight (g) | SD    | N | Weight (g) | SD    | N | P Value |
| 28         | 18.28      | 2.096 | 4 | 19.42      | 1.512 | 6 | 0.34    | 13.16      | 4.247 | 5 | 15.06      | 1.809 | 7 | 0.31    |
| 88         | 30.32      | 2.388 | 4 | 31.57      | 2.633 | 6 | 0.47    | 24.66      | 4.312 | 5 | 27.1       | 3.763 | 7 | 0.32    |

**1F. Body Weights (Euploid vs. Ts65Dn):**

|            | Fluoxetine |       |   |            |       |   |         | Control    |       |   |            |       |   |         |
|------------|------------|-------|---|------------|-------|---|---------|------------|-------|---|------------|-------|---|---------|
|            | Euploid    |       |   | Ts65Dn     |       |   |         | Euploid    |       |   | Ts65Dn     |       |   |         |
| Age (Days) | Weight (g) | SD    | N | Weight (g) | SD    | N | P Value | Weight (g) | SD    | N | Weight (g) | SD    | N | P Value |
| 28         | 18.28      | 2.096 | 4 | 13.16      | 4.247 | 5 | 0.07    | 19.42      | 1.512 | 6 | 15.06      | 1.809 | 7 | < 0.01  |
| 88         | 30.32      | 2.388 | 4 | 24.66      | 4.312 | 5 | 0.05    | 31.57      | 2.633 | 6 | 27.1       | 3.763 | 7 | 0.03    |

Table S2: Differentially expressed proteins in cerebral cortex

| gene          | $\pi_{TW/EW} \times \pi_{TF/TW}$ | log2FC<br>TW/EW | padj<br>TW/EW | log2FC<br>TF/TW | padj<br>TF/TW | log2FC<br>EF/EW | padj<br>EF/EW | log2FC<br>TF/EW | padj<br>TF/EW | description                                               | accession  |
|---------------|----------------------------------|-----------------|---------------|-----------------|---------------|-----------------|---------------|-----------------|---------------|-----------------------------------------------------------|------------|
| 2410002F23Rik | -19.6676                         | 6.06            | 0.23          | -7.05           | 0.19          | -0.78           | 0.82          | -1.00           | 0.78          | RIKEN cDNA 2410002F23 gene                                | Q3TE80     |
| 2900026A02Rik | -4.7211                          | 3.09            | 0.065         | -2.20           | 0.26          | 0.99            | 0.43          | 0.89            | 0.47          | RIKEN cDNA 2900026A02 gene                                | A0A1B0GR85 |
| 4833439L19Rik | 0.0000                           | 0.01            | 0.85          | -0.02           | 0.7           | 0.12            | 0.99          | -0.01           | 0.8           | Putative monooxygenase p33MONOX                           | D3Z1F7     |
| 6430548M08Rik | 0.0000                           | 0.02            | 0.86          | 0.00            | 0.88          | -0.23           | <u>0.0270</u> | 0.02            | 0.98          | RIKEN cDNA 6430548M08 gene                                | Q3TA40     |
| Aacs          | -0.3068                          | 3.09            | 0.92          | -7.08           | 0.41          | 3.49            | 0.55          | -3.99           | 0.62          | Acetoacetyl-CoA synthetase                                | Q9D2R0     |
| Aak1          | 0.0565                           | 0.05            | 0.42          | 0.75            | <u>0.0001</u> | -0.04           | 0.44          | 0.79            | <u>0.0001</u> | AP2-associated protein kinase 1                           | Q3UHH0     |
| Aars1         | 0.0012                           | -0.31           | 0.85          | -0.07           | 0.17          | -0.18           | 0.11          | -0.38           | 0.17          | Alanine-tRNA ligase, cytoplasmic                          | Q8BGQ7     |
| Abat          | 0.0033                           | -0.16           | 0.52          | -0.16           | 0.35          | -0.19           | 0.22          | -0.32           | 0.089         | 4-aminobutyrate aminotransferase, mitochondrial           | P61922     |
| Abcb1a        | -0.0025                          | 0.16            | 0.5           | -0.16           | 0.47          | 0.09            | 0.76          | 0.00            | 0.86          | ATP-dependent translocase ABCB1                           | P21447     |
| Abcb7         | -0.2556                          | 0.36            | 0.15          | -0.77           | 0.076         | -0.14           | 0.78          | -0.42           | 0.56          | ATP-binding cassette sub-family B member 7, mitochondrial | Q61102     |
| Abcb8         | 0.0006                           | 0.22            | 0.37          | 0.13            | 0.89          | 0.35            | 0.36          | 0.34            | 0.43          | Mitochondrial potassium channel ATP-binding subunit       | Q9CXJ4     |
| Abcd2         | -1.5618                          | 1.63            | <u>0.0110</u> | -0.91           | 0.29          | -0.19           | 0.8           | 0.72            | <u>0.0200</u> | ATP-binding cassette sub-family D member 2                | A0A0R4J0U5 |
| Abcd3         | 0.1102                           | 1.42            | <u>0.0480</u> | 0.22            | 0.54          | -0.72           | 0.62          | 1.65            | <u>0.0026</u> | ATP-binding cassette sub-family D member 3                | P55096     |
| Abce1         | -0.0541                          | 0.36            | 0.75          | -1.08           | 0.077         | 0.01            | 0.75          | -0.72           | 0.083         | ATP-binding cassette sub-family E member 1                | P61222     |
| Abcf1         | -3.2378                          | 0.70            | <u>0.0220</u> | -1.05           | <u>0.0022</u> | -0.02           | 0.57          | -0.35           | 0.34          | ATP-binding cassette sub-family F member 1                | Q6P542     |
| Abcf2         | 0.0057                           | 1.63            | 0.08          | 0.73            | 0.99          | -0.21           | 0.85          | 2.36            | 0.15          | ATP-binding cassette sub-family F member 2                | Q99LE6     |
| Abcg2         | 0.0001                           | -0.24           | 0.32          | -0.02           | 0.93          | 0.37            | 0.35          | -0.26           | 0.37          | ATP-binding cassette sub-family G member 2                | A0A0R4J0B6 |
| Abhd12        | -0.1108                          | 0.42            | <u>0.0150</u> | -0.22           | 0.22          | -0.53           | 0.51          | 0.21            | 0.12          | Lysophosphatidylserine lipase ABHD12                      | Q99LR1     |
| Abhd16a       | -0.0651                          | 0.41            | 0.41          | -0.95           | 0.37          | 0.40            | 0.62          | -0.54           | 0.66          | Phosphatidylserine lipase ABHD16A                         | Q9Z1Q2     |
| Abi2          | -0.0671                          | 0.29            | 0.23          | -0.34           | 0.086         | 0.17            | 0.65          | -0.05           | 0.62          | Abi2 protein                                              | Q6AXD2     |
| Ablim2        | -0.2260                          | 1.27            | 0.7           | -2.02           | 0.27          | 0.87            | 0.62          | -0.75           | 0.45          | Actin-binding LIM protein 2 (Fragment)                    | F6VWW4     |
| Abr           | 0.1887                           | 0.21            | 0.41          | 0.58            | <u>0.0001</u> | 0.06            | 0.63          | 0.79            | <u>0.0001</u> | Active breakpoint cluster region-related protein          | Q5SSL4     |
| Acaa2         | -0.0894                          | 0.12            | 0.38          | -0.56           | <u>0.0007</u> | 0.03            | 0.76          | -0.44           | <u>0.0260</u> | 3-ketoacyl-CoA thiolase, mitochondrial                    | Q8BWT1     |
| Acaca         | 0.0991                           | 1.97            | 0.11          | 0.42            | 0.75          | 1.57            | 0.2           | 2.39            | 0.12          | Acetyl-CoA carboxylase 1                                  | Q5SWU9     |
| Acad11        | 0.0316                           | 0.55            | 0.31          | 0.30            | 0.42          | 0.64            | 0.2           | 0.85            | 0.1           | Acyl-CoA dehydrogenase family member 11                   | A0A0R4J0I6 |
| Acad12        | -0.3452                          | -0.52           | 0.076         | 0.53            | 0.076         | -0.16           | 0.45          | 0.00            | 1             | Acyl-Coenzyme A dehydrogenase family, member 12           | D3Z7X0     |

Table S2: Differentially expressed proteins in cerebral cortex (*continued*)

| gene   | $\pi_{\text{TW/EW}} \times \pi_{\text{TF/TW}}$ | log2FC<br>TW/EW | padj<br>TW/EW | log2FC<br>TF/TW | padj<br>TF/TW | log2FC<br>EF/EW | padj<br>EF/EW | log2FC<br>TF/EW | padj<br>TF/EW | description                                                             | accession  |
|--------|------------------------------------------------|-----------------|---------------|-----------------|---------------|-----------------|---------------|-----------------|---------------|-------------------------------------------------------------------------|------------|
| Acad8  | -0.2321                                        | 3.53            | 0.84          | -3.79           | 0.59          | 4.99            | 0.12          | -0.26           | 0.71          | Isobutyryl-CoA dehydrogenase, mitochondrial                             | A0A0R4J0P1 |
| Acad9  | 0.0000                                         | -0.01           | 0.37          | -0.01           | 0.23          | 0.15            | 0.66          | -0.02           | 0.85          | Complex I assembly factor ACAD9, mitochondrial                          | Q8JZN5     |
| Acadl  | -0.0736                                        | 0.29            | <u>0.0220</u> | -0.24           | 0.23          | -0.43           | 0.22          | 0.04            | 0.83          | Long-chain specific acyl-CoA dehydrogenase, mitochondrial               | A0A0R4J083 |
| Acadm  | -0.0015                                        | 0.04            | 0.62          | -0.20           | 0.12          | 0.06            | 0.92          | -0.16           | 0.38          | Medium-chain specific acyl-CoA dehydrogenase, mitochondrial             | P45952     |
| Acads  | -0.0001                                        | -0.07           | 0.95          | 0.37            | 0.59          | -0.01           | 0.88          | 0.30            | 0.59          | Short-chain specific acyl-CoA dehydrogenase, mitochondrial              | Q07417     |
| Acadsb | 0.0002                                         | 0.12            | 0.17          | 0.09            | 0.94          | -0.07           | 0.78          | 0.21            | 0.14          | Short/branched chain specific acyl-CoA dehydrogenase, mitochondrial     | Q9DBL1     |
| Acadvl | -0.0003                                        | 0.03            | 0.64          | -0.10           | 0.37          | -0.06           | 0.7           | -0.07           | 0.85          | Very long-chain-specific acyl-CoA dehydrogenase, mitochondrial          | B1AR28     |
| Acan   | 0.1793                                         | -0.46           | <u>0.0370</u> | -0.55           | 0.32          | 0.10            | 0.59          | -1.01           | <u>0.0010</u> | Aggrecan core protein                                                   | Q61282     |
| Acap2  | -0.0001                                        | -0.20           | 0.93          | 0.30            | 0.85          | 0.15            | 0.54          | 0.10            | 0.87          | Arf-GAP with coiled-coil, ANK repeat and PH domain-containing protein 2 | D4AFX6     |
| Acat1  | -0.0028                                        | 0.08            | 0.42          | -0.12           | 0.17          | 0.04            | 0.97          | -0.04           | 0.69          | Acetyl-CoA acetyltransferase, mitochondrial                             | Q8QZT1     |
| Acly   | 0.0040                                         | 0.28            | 0.13          | 0.10            | 0.69          | 0.21            | 0.57          | 0.38            | 0.2           | ATP-citrate synthase                                                    | Q3V117     |
| Aco1   | 0.0019                                         | -0.17           | 0.22          | -0.10           | 0.67          | -0.72           | <u>0.0008</u> | -0.27           | <u>0.0020</u> | Cytoplasmic aconitate hydratase                                         | P28271     |
| Aco2   | 0.0483                                         | -0.09           | 0.29          | -0.37           | <u>0.0020</u> | 0.05            | 0.96          | -0.45           | 0.3           | Aconitate hydratase, mitochondrial                                      | Q99KI0     |
| Acot11 | -0.0462                                        | 0.71            | 0.29          | -0.38           | 0.48          | -0.07           | 0.93          | 0.33            | 0.76          | Acyl-coenzyme A thioesterase 11                                         | A2AVR6     |
| Acot13 | -0.2120                                        | 0.22            | 0.16          | -0.48           | <u>0.0030</u> | -0.40           | 0.16          | -0.26           | 0.26          | Acyl-coenzyme A thioesterase 13                                         | Q9CQR4     |
| Acot7  | 0.0246                                         | -0.22           | 0.74          | -0.93           | 0.12          | -0.43           | 0.68          | -1.15           | 0.098         | Cytosolic acyl coenzyme A thioester hydrolase                           | Q91V12     |
| Acot9  | 1.7074                                         | 0.80            | <u>0.0046</u> | 0.57            | <u>0.0250</u> | 0.15            | 0.79          | 1.37            | <u>0.0001</u> | Acyl-coenzyme A thioesterase 9, mitochondrial                           | Q9R0X4     |
| Acox1  | -0.0106                                        | 0.34            | 0.37          | -0.22           | 0.47          | 0.19            | 0.66          | 0.12            | 0.65          | Peroxisomal acyl-coenzyme A oxidase 1                                   | Q9R0H0     |
| Acsbg1 | -0.0003                                        | 0.20            | 0.82          | -0.21           | 0.81          | 0.50            | 0.24          | -0.01           | 0.95          | Long-chain-fatty-acid-CoA ligase ACSBG1                                 | Q99PU5     |
| Acs11  | -0.0134                                        | 0.17            | 0.5           | -0.33           | 0.16          | -0.02           | 0.71          | -0.16           | 0.33          | Long-chain-fatty-acid-CoA ligase 1                                      | D3Z041     |
| Acs16  | -0.0047                                        | 0.16            | 0.84          | -0.55           | 0.2           | -0.15           | 0.83          | -0.39           | 0.42          | Long chain acyl-CoA synthetase 6 isoform 3                              | Q5ICG5     |
| Acss1  | -0.1186                                        | 0.75            | 0.7           | -1.46           | 0.2           | 0.41            | 0.72          | -0.71           | 0.59          | Acetyl-coenzyme A synthetase 2-like, mitochondrial                      | Q99NB1     |
| Actg1  | -1.0448                                        | 0.33            | <u>0.0350</u> | -0.64           | <u>0.0004</u> | 0.73            | <u>0.0170</u> | -0.31           | 0.23          | Actin, cytoplasmic 2                                                    | P63260     |
| Actn1  | -1.1986                                        | 0.71            | 0.17          | -1.12           | <u>0.0110</u> | 1.12            | <u>0.0270</u> | -0.41           | 0.27          | Alpha actinin 1a                                                        | A1BN54     |
| Actn4  | -0.0003                                        | -0.09           | 0.61          | 0.09            | 0.63          | 0.65            | 0.077         | 0.00            | 0.96          | Alpha-actinin-4                                                         | A0A1L1SV25 |

Table S2: Differentially expressed proteins in cerebral cortex (*continued*)

| gene   | $\pi_{TW/EW} \times \pi_{TF/TW}$ | log2FC<br>TW/EW | padj<br>TW/EW | log2FC<br>TF/TW | padj<br>TF/TW | log2FC<br>EF/EW | padj<br>EF/EW | log2FC<br>TF/EW | padj<br>TF/EW | description                                                        | accession  |
|--------|----------------------------------|-----------------|---------------|-----------------|---------------|-----------------|---------------|-----------------|---------------|--------------------------------------------------------------------|------------|
| Actr10 | 0.0017                           | 0.04            | 0.63          | 0.18            | 0.063         | 0.50            | <u>0.0270</u> | 0.22            | 0.052         | Actin-related protein 10                                           | Q9QZB7     |
| Actr1a | 0.0003                           | 0.06            | 0.84          | 0.27            | 0.52          | 0.89            | <u>0.0013</u> | 0.33            | 0.071         | Alpha-centractin                                                   | P61164     |
| Actr1b | -0.0036                          | -0.07           | 0.76          | 0.36            | 0.064         | 0.27            | 0.093         | 0.29            | <u>0.0110</u> | Beta-centractin                                                    | Q8R5C5     |
| Actr2  | 0.0000                           | -0.14           | 0.68          | 0.00            | 0.73          | 0.12            | 0.49          | -0.14           | 0.47          | Actin-related protein 2                                            | P61161     |
| Actr3  | 0.0002                           | -0.11           | 0.97          | -0.21           | 0.24          | 0.05            | 0.82          | -0.32           | 0.27          | Actin-related protein 3                                            | Q99JY9     |
| Actr3b | 0.0000                           | -0.12           | 0.99          | -0.06           | 0.17          | 0.00            | 0.76          | -0.18           | <u>0.0220</u> | Actin-related protein 3B                                           | Q641P0     |
| Acyp1  | 0.1313                           | -0.67           | <u>0.0060</u> | -0.32           | 0.53          | -0.27           | 0.11          | -0.99           | <u>0.0003</u> | Acylphosphatase                                                    | E9QJT5     |
| Adam10 | 0.0000                           | -0.10           | 0.98          | 0.17            | 0.5           | -0.07           | 0.92          | 0.07            | 0.61          | Disintegrin and metalloproteinase domain-containing protein 10     | O35598     |
| Adam11 | -0.1013                          | 0.28            | <u>0.0340</u> | -0.32           | 0.17          | -0.07           | 0.74          | -0.04           | 0.77          | Adam11 protein                                                     | Q7TQG7     |
| Adam22 | 0.0080                           | 0.14            | <u>0.0140</u> | 0.05            | 0.24          | 0.16            | 0.34          | 0.19            | 0.27          | Disintegrin and metalloproteinase domain-containing protein 22     | D3YUP9     |
| Adam23 | -0.0001                          | 0.07            | 0.87          | -0.17           | 0.73          | 0.47            | 0.067         | -0.11           | 0.4           | Disintegrin and metalloproteinase domain-containing protein 23     | Q9R1V7     |
| Adap1  | -0.0156                          | 0.11            | 0.81          | -0.74           | <u>0.0080</u> | -0.01           | 0.95          | -0.64           | <u>0.0070</u> | ArfGAP with dual PH domains 1                                      | E9PY16     |
| Adcy1  | -0.1756                          | 1.51            | 0.41          | -1.23           | 0.57          | 0.22            | 0.65          | 0.28            | 0.73          | Adenylate cyclase type 1                                           | O88444     |
| Adcy2  | -0.0179                          | 0.36            | 0.11          | -0.13           | 0.4           | -0.14           | 0.68          | 0.23            | 0.94          | Adenylate cyclase type 2                                           | Q80TL1     |
| Adcy5  | 0.0038                           | 0.12            | 0.61          | 0.41            | 0.44          | 0.47            | 0.054         | 0.53            | 0.29          | Adenylate cyclase type 5                                           | P84309     |
| Adcy9  | -0.0001                          | 0.23            | 0.43          | -0.03           | 0.93          | 0.46            | 0.22          | 0.20            | 0.46          | Adenylate cyclase type 9                                           | P51830     |
| Add1   | 0.0000                           | -0.04           | 0.94          | -0.09           | 0.58          | 0.24            | 0.42          | -0.13           | 0.77          | Alpha-adducin                                                      | Q9QYCO     |
| Add2   | 0.0003                           | -0.06           | 0.87          | -0.10           | 0.11          | 0.30            | <u>0.0010</u> | -0.16           | 0.11          | Beta-adducin                                                       | Q9QYB8     |
| Add3   | -0.0052                          | -1.20           | 0.46          | 0.16            | 0.83          | -0.64           | 0.76          | -1.03           | 0.67          | Gamma-adducin                                                      | Q9QYB5     |
| Adgra1 | 0.0209                           | -0.50           | 0.84          | -0.74           | 0.18          | -0.85           | 0.33          | -1.24           | <u>0.0350</u> | Adhesion G protein-coupled receptor A1                             | Q8C4G9     |
| Adgrb1 | -0.0001                          | 0.28            | 0.93          | -0.14           | 0.87          | -0.10           | 0.75          | 0.14            | 0.91          | Adhesion G protein-coupled receptor B1                             | Q3UHD1     |
| Adgrb3 | 0.0301                           | -0.31           | 0.29          | -0.30           | 0.25          | 0.08            | 0.81          | -0.61           | 0.054         | Adhesion G protein-coupled receptor B3 (Fragment)                  | Q68FL1     |
| Adgrl1 | -0.0507                          | 0.22            | 0.13          | -0.25           | 0.091         | 0.16            | 0.54          | -0.02           | 0.67          | Adhesion G protein-coupled receptor L1                             | H7BX15     |
| Adgrl3 | -0.0007                          | 0.16            | 0.93          | -0.55           | 0.56          | -0.88           | 0.58          | -0.39           | 0.49          | Adhesion G protein-coupled receptor L3                             | D3Z3G4     |
| Adh5   | -0.5693                          | -0.91           | <u>0.0010</u> | 0.28            | 0.18          | -0.49           | 0.068         | -0.63           | <u>0.0280</u> | Alcohol dehydrogenase class-3                                      | P28474     |
| Ado    | 0.0132                           | -0.19           | 0.19          | -0.17           | 0.27          | 0.17            | 0.18          | -0.36           | <u>0.0220</u> | 2-aminoethanethiol dioxxygenase                                    | Q6PDY2     |
| Adss2  | 0.0050                           | -0.06           | 0.54          | -0.38           | 0.15          | -0.19           | 0.86          | -0.44           | 0.65          | Adenylosuccinate synthetase isozyme 2                              | P46664     |
| Afdn   | -1.7335                          | 0.75            | <u>0.0170</u> | -0.68           | <u>0.0120</u> | 0.36            | 0.27          | 0.07            | 0.66          | Afadin                                                             | E9Q852     |
| Afg3l2 | -1.4831                          | 0.63            | <u>0.0034</u> | -0.45           | <u>0.0076</u> | 0.13            | 0.8           | 0.18            | 0.61          | AFG3-like protein 2                                                | Q8JZQ2     |
| Agap2  | -1.2053                          | 1.00            | 0.3           | -1.83           | 0.055         | -1.01           | 0.21          | -0.83           | 0.34          | Arf-GAP with GTPase, ANK repeat and PH domain-containing protein 2 | Q3UHD9     |
| Agap3  | -0.0168                          | 1.08            | 0.38          | -0.31           | 0.76          | 0.37            | 0.62          | 0.77            | 0.54          | Arf-GAP with GTPase, ANK repeat and PH domain-containing protein 3 | F8VQE9     |
| Agfg1  | -0.0504                          | 0.60            | 0.056         | -0.07           | 0.11          | 0.24            | 0.49          | 0.53            | 0.69          | Arf-GAP domain and FG repeat-containing protein 1 (Fragment)       | A0A087WR52 |

Table S2: Differentially expressed proteins in cerebral cortex (*continued*)

| gene     | $\pi_{TW/EW} \times \pi_{TF/TW}$ | log2FC<br>TW/EW | padj<br>TW/EW | log2FC<br>TF/TW | padj<br>TF/TW | log2FC<br>EF/EW | padj<br>EF/EW | log2FC<br>TF/EW | padj<br>TF/EW | description                                                                 | accession  |
|----------|----------------------------------|-----------------|---------------|-----------------|---------------|-----------------|---------------|-----------------|---------------|-----------------------------------------------------------------------------|------------|
| Agk      | 0.0002                           | 0.21            | 0.94          | 0.12            | 0.47          | 0.14            | 0.83          | 0.34            | 0.27          | Acylglycerol kinase, mitochondrial                                          | Q9ESW4     |
| Agl      | -0.0048                          | -0.11           | 0.52          | 0.24            | 0.23          | -0.13           | 0.88          | 0.13            | 0.47          | 4-alpha-glucanotransferase                                                  | F8VPN4     |
| Ago1     | -0.0001                          | -0.26           | 0.91          | 0.12            | 0.91          | -1.15           | 0.32          | -0.14           | 0.72          | Protein argonaute-1                                                         | A0A6I8MX18 |
| Ago2     | 0.0000                           | 0.19            | 1             | -5.07           | 0.25          | -0.30           | 0.92          | -4.88           | 0.15          | Protein argonaute-2                                                         | Q8CJG0     |
| Agpat5   | -11.2876                         | 2.71            | <u>0.0460</u> | -2.41           | 0.051         | -0.85           | 0.47          | 0.31            | 0.81          | 1-acyl-sn-glycerol-3-phosphate<br>acyltransferase epsilon                   | F8WGD9     |
| Ahcy     | -0.0199                          | -0.34           | <u>0.0390</u> | 0.12            | 0.45          | -0.15           | 0.39          | -0.22           | 0.14          | Adenosylhomocysteinase                                                      | P50247     |
| Ahcy11   | -0.0346                          | -0.25           | <u>0.0270</u> | 0.34            | 0.55          | -0.14           | 0.28          | 0.09            | 0.94          | S-adenosylhomocysteine hydrolase-like<br>protein 1                          | Q80SW1     |
| Ahnak    | -0.3071                          | 0.43            | 0.45          | -0.83           | <u>0.0033</u> | -1.30           | 0.26          | -0.40           | 0.9           | AHNAK nucleoprotein (desmoyokin)                                            | E9Q616     |
| Ahsa1    | -0.0094                          | 0.13            | 0.58          | -0.32           | 0.11          | -0.26           | 0.28          | -0.19           | 0.36          | Activator of 90 kDa heat shock protein<br>ATPase homolog 1                  | Q8BK64     |
| Aifm1    | -0.3861                          | 0.45            | 0.12          | -0.60           | <u>0.0280</u> | 0.17            | 0.58          | -0.15           | 0.31          | Apoptosis-inducing factor 1, mitochondrial                                  | B1AU25     |
| Aifm3    | -3.5424                          | 0.41            | <u>0.0010</u> | -0.72           | <u>0.0001</u> | 0.00            | 0.58          | -0.31           | <u>0.0004</u> | Apoptosis-inducing factor 3                                                 | Q3TY86     |
| Aimp1    | 0.0008                           | 0.13            | 0.47          | 0.10            | 0.64          | 0.12            | 0.63          | 0.23            | 0.19          | Aminoacyl tRNA synthase<br>complex-interacting multifunctional<br>protein 1 | P31230     |
| Aimp2    | 0.0000                           | 0.09            | 0.85          | 0.00            | 0.6           | -0.05           | 0.85          | 0.08            | 0.73          | Aminoacyl tRNA synthase<br>complex-interacting multifunctional<br>protein 2 | Q8R010     |
| Aip      | -0.0046                          | -0.09           | 0.75          | 0.43            | 0.11          | 0.26            | 0.57          | 0.33            | 0.22          | AH receptor-interacting protein                                             | O08915     |
| Ajm1     | -3.6457                          | 0.80            | 0.16          | -1.73           | <u>0.0005</u> | 0.19            | 0.41          | -0.93           | <u>0.0440</u> | Apical junction component 1 homolog                                         | A2AJA9     |
| Ak1      | 0.0192                           | -0.07           | 0.5           | -0.68           | <u>0.0460</u> | -0.95           | 0.44          | -0.75           | 0.43          | Adenylate kinase isoenzyme 1                                                | Q9R0Y5     |
| AK157302 | -2.3408                          | 0.70            | 0.17          | -1.61           | <u>0.0020</u> | -0.46           | 0.24          | -0.91           | 0.095         | cDNA sequence AK157302                                                      | I3ITR1     |
| Ak2      | -0.0292                          | -0.45           | 0.39          | 0.41            | 0.41          | 0.11            | 0.71          | -0.03           | 0.98          | Adenylate kinase 2, mitochondrial                                           | Q9WTP6     |
| Ak3      | 0.0011                           | -0.04           | 0.9           | -0.46           | <u>0.0460</u> | -0.49           | 0.082         | -0.50           | <u>0.0110</u> | GTP:AMP phosphotransferase AK3,<br>mitochondrial                            | Q9WTP7     |
| Ak4      | 0.0013                           | -0.02           | 0.76          | -0.60           | 0.12          | -0.14           | 0.86          | -0.62           | 0.25          | Adenylate kinase 4, mitochondrial                                           | Q9WUR9     |
| Ak5      | -0.0078                          | 0.30            | 0.43          | -0.38           | 0.65          | -0.58           | 0.27          | -0.07           | 0.77          | Adenylate kinase isoenzyme 5                                                | Q920P5     |
| Akap5    | 0.0000                           | 0.01            | 0.44          | 0.05            | 0.89          | 0.02            | 0.31          | 0.06            | 0.52          | A-kinase anchor protein 5                                                   | D3YVF0     |
| Akr1a1   | 0.0018                           | -0.04           | 0.64          | -0.27           | 0.14          | 0.15            | 0.17          | -0.32           | 0.36          | Aldo-keto reductase family 1 member A1                                      | Q9JII6     |
| Akr1b1   | -0.0124                          | -0.52           | 0.51          | 0.27            | 0.5           | -0.57           | <u>0.0010</u> | -0.24           | 0.99          | Aldo-keto reductase family 1 member B1                                      | P45376     |
| Akr7a2   | -0.0010                          | -0.48           | 0.28          | 0.03            | 0.75          | -0.46           | 0.59          | -0.45           | 0.42          | Aflatoxin B1 aldehyde reductase member 2                                    | Q8CG76     |
| Alb      | -0.3687                          | -0.71           | <u>0.0001</u> | 0.18            | 0.19          | -0.44           | <u>0.0001</u> | -0.53           | <u>0.0001</u> | Albumin                                                                     | P07724     |
| Aldh18a1 | -0.0001                          | 0.10            | 0.74          | -0.07           | 0.82          | 0.57            | 0.22          | 0.04            | 1             | Delta-1-pyrroline-5-carboxylate synthase                                    | Q9Z110     |
| Aldh111  | 0.0090                           | -0.16           | 0.19          | -0.18           | 0.37          | 0.15            | 0.92          | -0.35           | <u>0.0010</u> | Cytosolic 10-formyltetrahydrofolate<br>dehydrogenase                        | Q8R0Y6     |
| Aldh2    | 0.0077                           | -0.37           | 0.69          | -0.30           | 0.37          | -0.48           | 0.29          | -0.67           | 0.2           | Aldehyde dehydrogenase, mitochondrial                                       | A0A0G2JEU1 |
| Aldh3a2  | -0.0262                          | 0.38            | 0.062         | -0.19           | 0.5           | 0.15            | 0.41          | 0.20            | 0.98          | Aldehyde dehydrogenase                                                      | B1ATI0     |

Table S2: Differentially expressed proteins in cerebral cortex (*continued*)

| gene    | $\pi_{TW/EW} \times \pi_{TF/TW}$ | log2FC<br>TW/EW | padj<br>TW/EW | log2FC<br>TF/TW | padj<br>TF/TW | log2FC<br>EF/EW | padj<br>EF/EW | log2FC<br>TF/EW | padj<br>TF/EW | description                                                          | accession  |
|---------|----------------------------------|-----------------|---------------|-----------------|---------------|-----------------|---------------|-----------------|---------------|----------------------------------------------------------------------|------------|
| Aldh3b1 | -1.9819                          | 1.19            | 0.11          | -1.29           | <u>0.0450</u> | 0.42            | 0.22          | -0.09           | 0.78          | Aldehyde dehydrogenase family 3 member B1                            | Q80VQ0     |
| Aldh5a1 | -0.0280                          | 0.10            | 0.19          | -0.29           | <u>0.0460</u> | -0.33           | 0.1           | -0.19           | 0.61          | Succinate-semialdehyde dehydrogenase, mitochondrial                  | Q8BWF0     |
| Aldh6a1 | 0.0028                           | -0.26           | <u>0.0260</u> | -0.07           | 0.8           | -0.16           | 0.23          | -0.34           | <u>0.0020</u> | Methylmalonate-semialdehyde dehydrogenase [acylating], mitochondrial | Q9EQ20     |
| Aldh7a1 | 0.0396                           | -0.89           | 0.21          | -0.20           | 0.47          | -0.39           | 0.37          | -1.09           | <u>0.0040</u> | Alpha-aminoadipic semialdehyde dehydrogenase                         | Q9DBF1     |
| Aldoa   | -0.0010                          | 0.08            | 0.47          | -0.08           | 0.35          | -0.03           | 0.96          | 0.00            | 0.79          | Fructose-bisphosphate aldolase                                       | A6ZI44     |
| Aldoc   | -0.0005                          | -0.14           | 0.35          | 0.01            | 0.14          | -0.19           | 0.19          | -0.13           | 0.27          | Fructose-bisphosphate aldolase C                                     | P05063     |
| Alyref  | -0.0160                          | 0.32            | 0.64          | -0.65           | 0.4           | -0.32           | 0.46          | -0.33           | 0.24          | THO complex subunit 4                                                | O08583     |
| Amer2   | -0.0008                          | 0.32            | 0.43          | -0.10           | 0.85          | -0.36           | 0.21          | 0.22            | 0.42          | APC membrane recruitment protein 2                                   | Q8CCJ4     |
| Amot    | -0.0066                          | 0.32            | 0.68          | -0.46           | 0.54          | 0.17            | 0.5           | -0.13           | 0.88          | Angiomotin                                                           | Q8VHG2     |
| Ampd2   | 0.0004                           | 0.12            | 0.84          | 0.30            | 0.69          | 0.03            | 0.93          | 0.42            | 0.52          | AMP deaminase                                                        | A2AE27     |
| Amph    | 0.0000                           | 0.00            | 0.47          | 0.36            | 0.27          | 0.08            | 0.44          | 0.36            | <u>0.0360</u> | Amphiphysin                                                          | A0A0G2JEG8 |
| Amy2    | 0.0165                           | -0.70           | 0.076         | -0.23           | 0.81          | -0.33           | 0.4           | -0.93           | 0.09          | Pancreatic alpha-amylase                                             | P00688     |
| Ank1    | 0.0874                           | -0.45           | 0.32          | -0.51           | 0.17          | -0.69           | <u>0.0250</u> | -0.97           | <u>0.0005</u> | Ankyrin-1                                                            | A0A0R4J1N7 |
| Ank2    | -17.3302                         | 0.97            | <u>0.0003</u> | -1.24           | <u>0.0001</u> | 0.54            | <u>0.0070</u> | -0.27           | 0.14          | Ankyrin-2                                                            | S4R2F3     |
| Ank3    | -1.7575                          | 1.11            | 0.12          | -1.23           | <u>0.0400</u> | 0.40            | 0.42          | -0.11           | 0.59          | Ankyrin-3 (Fragment)                                                 | A0A087WNU5 |
| Ank3    | -14.3409                         | 2.74            | <u>0.0140</u> | -2.17           | 0.05          | 0.19            | 0.92          | 0.57            | 0.59          | Ankyrin-3                                                            | S4R165     |
| Ank3    | -0.1256                          | 0.64            | 0.39          | -0.73           | 0.22          | 0.27            | 0.78          | -0.09           | 0.94          | Ankyrin-3                                                            | W4VSQ0     |
| Ankrd29 | -2.0992                          | -0.58           | <u>0.0250</u> | 0.80            | <u>0.0015</u> | 0.55            | 0.23          | 0.22            | 0.45          | Ankyrin repeat domain 29                                             | D3YTU5     |
| Ankrd63 | -0.0409                          | 0.47            | 0.67          | -1.01           | 0.32          | 0.28            | 0.77          | -0.54           | 0.61          | Ankyrin repeat domain-containing protein 63                          | A2ARS0     |
| Anks1b  | -12.0282                         | 1.79            | 0.054         | -2.46           | <u>0.0070</u> | -0.35           | 0.36          | -0.68           | 0.1           | Ankyrin repeat and sterile alpha motif domain-containing protein 1B  | S4R2Q2     |
| Anpep   | 0.0000                           | -0.38           | 0.33          | -0.01           | 1             | -0.02           | 0.97          | -0.38           | 0.19          | Aminopeptidase N                                                     | P97449     |
| Anxa2   | 0.4566                           | -0.81           | 0.6           | -4.10           | 0.24          | -3.94           | 0.84          | -4.91           | 0.26          | Annexin (Fragment)                                                   | B0V2N7     |
| Anxa3   | -0.0054                          | -0.42           | 0.2           | 0.11            | 0.68          | -0.03           | 0.97          | -0.31           | 0.4           | Annexin A3                                                           | O35639     |
| Anxa5   | 0.2255                           | -0.34           | <u>0.0100</u> | -0.32           | 0.092         | -0.59           | <u>0.0110</u> | -0.66           | <u>0.0030</u> | Annexin A5                                                           | P48036     |
| Anxa6   | 0.0021                           | -0.52           | <u>0.0110</u> | -0.04           | 0.89          | -0.52           | 0.12          | -0.55           | <u>0.0300</u> | Annexin                                                              | F8WIT2     |
| Anxa7   | 0.0008                           | -0.27           | 0.61          | -0.14           | 0.8           | -0.09           | 0.96          | -0.41           | 0.39          | Annexin                                                              | A0A2C9F2D2 |
| Ap1g1   | 0.5222                           | 0.56            | 0.57          | 1.91            | <u>0.0100</u> | 1.20            | 0.13          | 2.47            | <u>0.0010</u> | AP-1 complex subunit gamma                                           | Q8CBB7     |
| Ap1g2   | -0.4779                          | -0.73           | 0.22          | 0.81            | 0.059         | 0.55            | 0.11          | 0.08            | 0.89          | AP-1 complex subunit gamma-like 2                                    | O88512     |
| Ap1m1   | 0.0015                           | 0.46            | 0.48          | 0.08            | 0.75          | -0.73           | 0.22          | 0.54            | 0.49          | AP-1 complex subunit mu-1                                            | P35585     |
| Ap1s1   | 0.4280                           | 0.48            | <u>0.0280</u> | 0.47            | 0.06          | 0.02            | 0.9           | 0.95            | <u>0.0280</u> | AP-1 complex subunit sigma-1A                                        | P61967     |
| Ap2a1   | -0.0414                          | -0.14           | 0.56          | 0.70            | <u>0.0210</u> | 0.18            | 0.27          | 0.56            | <u>0.0010</u> | AP-2 complex subunit alpha-1                                         | P17426     |
| Ap2a2   | 0.2007                           | 0.07            | 0.15          | 0.87            | <u>0.0001</u> | 0.35            | <u>0.0330</u> | 0.94            | <u>0.0001</u> | AP-2 complex subunit alpha-2                                         | P17427     |

Table S2: Differentially expressed proteins in cerebral cortex (*continued*)

| gene    | $\pi_{TW/EW} \times \pi_{TF/TW}$ | log2FC<br>TW/EW | padj<br>TW/EW | log2FC<br>TF/TW | padj<br>TF/TW | log2FC<br>EF/EW | padj<br>EF/EW | log2FC<br>TF/EW | padj<br>TF/EW | description                                                                      | accession  |
|---------|----------------------------------|-----------------|---------------|-----------------|---------------|-----------------|---------------|-----------------|---------------|----------------------------------------------------------------------------------|------------|
| Ap2b1   | -0.1565                          | -0.17           | 0.54          | 0.86            | <u>0.0001</u> | 0.27            | 0.27          | 0.69            | <u>0.0001</u> | AP complex subunit beta                                                          | H3BKM0     |
| Ap2m1   | -2.4140                          | 0.50            | <u>0.0001</u> | -0.33           | <u>0.0002</u> | -0.29           | <u>0.0048</u> | 0.17            | 0.29          | AP-2 complex subunit mu                                                          | P84091     |
| Ap2s1   | -0.0882                          | -0.30           | <u>0.0080</u> | 0.44            | 0.48          | 0.25            | <u>0.0120</u> | 0.15            | 0.5           | AP-2 complex subunit sigma                                                       | P62743     |
| Ap3b2   | 0.0653                           | 0.19            | 0.18          | 0.56            | 0.15          | 0.06            | 0.77          | 0.75            | <u>0.0001</u> | AP-3 complex subunit beta-2                                                      | Q9JME5     |
| Ap3d1   | -4.4061                          | 2.46            | 0.3           | -3.72           | 0.12          | 0.38            | 0.69          | -1.26           | 0.58          | AP-3 complex subunit delta-1                                                     | O54774     |
| Ap3m1   | 0.0091                           | 0.37            | 0.7           | 0.54            | 0.51          | -0.61           | 0.55          | 0.91            | 0.48          | AP-3 complex subunit mu-1                                                        | A0A286YDZ6 |
| Ap3m2   | 0.3689                           | 1.15            | <u>0.0067</u> | 0.45            | 0.47          | -0.24           | 0.58          | 1.60            | <u>0.0030</u> | AP-3 complex subunit mu-2                                                        | Q8R2R9     |
| Ap3s2   | -0.0316                          | 0.85            | 0.35          | -0.38           | 0.61          | 1.26            | 0.21          | 0.48            | 0.83          | AP-3 complex subunit sigma-2                                                     | Q8BSZ2     |
| Apba1   | -0.4075                          | -0.60           | 0.34          | 2.01            | 0.19          | 0.23            | 0.67          | 1.41            | 0.39          | Amyloid-beta A4 precursor<br>protein-binding family A member 1                   | B2RUJ5     |
| Apba2   | -3.1607                          | 2.52            | 0.14          | -2.37           | 0.24          | 0.88            | 0.28          | 0.15            | 0.64          | Amyloid-beta A4 precursor<br>protein-binding family A member 2                   | A0A0U1RPM0 |
| Apc     | -3.5419                          | 1.26            | 0.091         | -1.32           | <u>0.0090</u> | 0.09            | 0.78          | -0.05           | 0.76          | Adenomatosis polyposis coli                                                      | B2RUG9     |
| Apeh    | -0.0004                          | -0.24           | 0.094         | 0.03            | 0.89          | -0.12           | 0.4           | -0.22           | 0.24          | Acyl-peptide hydrolase (Fragment)                                                | A0A0R4J107 |
| Apex1   | -0.0001                          | 0.28            | 0.6           | -0.09           | 0.97          | -0.06           | 0.94          | 0.19            | 0.64          | DNA-(apurinic or apyrimidinic site)<br>endonuclease (Fragment)                   | F6QA74     |
| Api5    | 0.0002                           | 0.12            | 0.31          | 0.01            | 0.56          | -0.24           | 0.11          | 0.13            | 0.47          | Apoptosis inhibitor 5                                                            | O35841     |
| Ap1p1   | 0.0020                           | 0.34            | 0.65          | 0.16            | 0.64          | 0.59            | 0.23          | 0.51            | 0.4           | Amyloid-like protein 1                                                           | A0A0R4IZZ1 |
| Apoa1   | 0.0178                           | -0.76           | 0.57          | -0.31           | 0.49          | -0.79           | 0.29          | -1.07           | 0.29          | Apolipoprotein A-I                                                               | Q00623     |
| Apoe    | 0.0198                           | -0.10           | 0.5           | -0.36           | <u>0.0150</u> | 0.19            | 0.47          | -0.46           | <u>0.0390</u> | Apolipoprotein E                                                                 | P08226     |
| Apoo    | -0.0256                          | 0.52            | 0.32          | -0.33           | 0.5           | -1.22           | 0.35          | 0.20            | 0.84          | MICOS complex subunit Mic26                                                      | Q9DCZ4     |
| App     | 0.0004                           | 0.23            | 0.94          | 0.42            | 0.7           | 1.45            | 0.3           | 0.65            | 0.69          | Amyloid-beta A4 protein                                                          | A0A2I3BPT1 |
| Ap1l1   | 0.0078                           | 0.28            | 0.12          | 0.11            | 0.53          | 0.13            | 0.6           | 0.39            | <u>0.0320</u> | DCC-interacting protein 13-alpha                                                 | Q8K3H0     |
| Ap1l2   | 0.0436                           | 0.22            | 0.34          | 0.30            | <u>0.0390</u> | 0.87            | <u>0.0004</u> | 0.52            | <u>0.0190</u> | DCC-interacting protein 13-beta                                                  | Q8K3G9     |
| Aqp4    | -0.0001                          | -0.23           | 0.12          | 0.02            | 0.95          | -0.43           | 0.19          | -0.21           | <u>0.094</u>  | Aquaporin-4                                                                      | A0A0R4J0Z3 |
| Arap2   | -59.2207                         | 7.16            | 0.12          | -8.47           | 0.087         | -1.24           | 0.58          | -1.31           | 0.52          | Arf-GAP with Rho-GAP domain, ANK<br>repeat and PH domain-containing protein<br>2 | E9QP44     |
| Arc     | -0.2436                          | 0.75            | 0.45          | -1.34           | 0.2           | 0.35            | 0.54          | -0.59           | 0.32          | Activity-regulated cytoskeleton-associated<br>protein                            | Q9WV31     |
| Arcn1   | 0.0480                           | 0.51            | <u>0.0330</u> | 0.56            | 0.77          | 0.38            | 0.16          | 1.08            | 0.064         | Coatomer subunit delta                                                           | Q5XJY5     |
| Arf4    | 0.0036                           | -0.05           | 0.8           | -0.45           | <u>0.0220</u> | -0.23           | 0.25          | -0.50           | <u>0.0150</u> | ADP-ribosylation factor 4                                                        | P61750     |
| Arfgap1 | -0.0222                          | 0.25            | 0.26          | -0.21           | 0.19          | 0.34            | 0.88          | 0.04            | 0.75          | ADP-ribosylation factor<br>GTPase-activating protein 1                           | Q3TGS9     |
| Arfgap2 | -9.9405                          | 2.38            | 0.14          | -3.15           | <u>0.0280</u> | 1.82            | 0.46          | -0.78           | 0.82          | ADP-ribosylation factor<br>GTPase-activating protein 2                           | Q99K28     |
| Arfgef2 | 0.0016                           | 0.32            | 0.48          | 0.09            | 0.67          | 0.34            | 0.33          | 0.41            | 0.27          | Brefeldin A-inhibited guanine<br>nucleotide-exchange protein 2                   | A2A5R2     |

Table S2: Differentially expressed proteins in cerebral cortex (*continued*)

| gene     | $\pi_{TW/EW} \times \pi_{TF/TW}$ | log2FC<br>TW/EW | padj<br>TW/EW | log2FC<br>TF/TW | padj<br>TF/TW | log2FC<br>EF/EW | padj<br>EF/EW | log2FC<br>TF/EW | padj<br>TF/EW | description                                                 | accession  |
|----------|----------------------------------|-----------------|---------------|-----------------|---------------|-----------------|---------------|-----------------|---------------|-------------------------------------------------------------|------------|
| Arfgef3  | -0.0004                          | 0.11            | 0.58          | -0.12           | 0.73          | 0.04            | 0.85          | 0.00            | 0.98          | Brefeldin A-inhibited guanine nucleotide-exchange protein 3 | Q3UGY8     |
| Arhgap12 | 0.1429                           | 1.25            | 0.14          | 0.31            | 0.37          | -2.57           | 0.34          | 1.56            | <u>0.0160</u> | Rho GTPase-activating protein 12                            | A0A0A0MQ95 |
| Arhgap17 | -0.0984                          | 0.32            | 0.16          | -0.34           | 0.073         | 0.02            | 0.94          | -0.02           | 0.92          | Rho GTPase-activating protein 17                            | E9QAJ9     |
| Arhgap21 | -0.0176                          | 1.92            | 0.34          | -0.62           | 0.93          | 0.47            | 0.86          | 1.30            | 0.16          | Rho GTPase-activating protein 21                            | A0A0A0MQE8 |
| Arhgap23 | -0.0001                          | 0.11            | 0.76          | -0.13           | 0.86          | -0.53           | 0.33          | -0.02           | 0.97          | Rho GTPase-activating protein 23                            | B1AQY2     |
| Arhgap26 | 0.0186                           | 0.30            | <u>0.0020</u> | 0.38            | 0.87          | 0.45            | 0.12          | 0.69            | <u>0.0470</u> | Rho GTPase-activating protein 26                            | E9QAQ3     |
| Arhgap32 | -2.0184                          | 0.88            | 0.088         | -1.21           | <u>0.0160</u> | -0.31           | 0.45          | -0.33           | 0.64          | Rho GTPase-activating protein 32                            | Q811P8     |
| Arhgap35 | -0.0559                          | 0.19            | 0.17          | -0.34           | 0.075         | -0.09           | 0.97          | -0.15           | 0.84          | Rho GTPase-activating protein 35                            | Q91YM2     |
| Arhgap39 | -2.0322                          | 0.83            | 0.46          | -2.42           | <u>0.0010</u> | -0.48           | 0.34          | -1.59           | <u>0.0030</u> | Rho GTPase-activating protein 39                            | H7BX46     |
| Arhgap44 | -0.2421                          | 0.30            | <u>0.0250</u> | -0.34           | <u>0.0330</u> | -0.27           | 0.27          | -0.04           | 0.98          | Rho GTPase-activating protein 44                            | Q5SSM3     |
| Arhgdia  | -0.0018                          | -0.48           | <u>0.0002</u> | 0.02            | 0.89          | -0.22           | 0.11          | -0.46           | <u>0.0001</u> | Rho GDP-dissociation inhibitor 1                            | Q99PT1     |
| Arhgef11 | 0.0011                           | -0.15           | 0.74          | -0.33           | 0.67          | 0.41            | 0.67          | -0.49           | 0.49          | Rho guanine nucleotide exchange factor (GEF) 11 (Fragment)  | E9Q0A3     |
| Arhgef12 | 0.0893                           | -0.87           | 0.53          | -3.45           | 0.78          | 0.67            | 0.83          | -4.32           | 0.32          | Rho guanine nucleotide exchange factor 12                   | F8VQN6     |
| Arhgef2  | -2.4190                          | 0.72            | 0.065         | -1.23           | <u>0.0050</u> | -0.31           | 0.37          | -0.51           | 0.23          | Guanine nucleotide exchange factor H1                       | H3BKH9     |
| Arhgef26 | -0.7939                          | 2.06            | 0.22          | -1.69           | 0.45          | -0.07           | 0.93          | 0.38            | 0.8           | Rho guanine nucleotide exchange factor (GEF) 26             | D3YYY8     |
| Arhgef7  | -0.1834                          | 1.78            | 0.12          | -0.22           | 0.31          | 1.59            | 0.21          | 1.56            | 0.17          | Rho guanine nucleotide exchange factor 7                    | Q9ES28     |
| Arhgef9  | -0.1215                          | 0.51            | 0.25          | -0.62           | 0.23          | -0.01           | 0.97          | -0.11           | 0.57          | Collybistin                                                 | B1AXI6     |
| Arid1b   | 0.0000                           | 0.30            | 0.6           | 0.07            | 1             | 0.20            | 0.7           | 0.37            | 0.46          | AT-rich interactive domain-containing protein 1B            | A0A338P6U8 |
| Arl8b    | -0.0039                          | 0.36            | 0.2           | -0.08           | 0.64          | 0.32            | 0.52          | 0.28            | 0.43          | ADP-ribosylation factor-like protein 8B                     | Q9CQW2     |
| Armc1    | -0.5358                          | -0.59           | 0.052         | 0.54            | <u>0.0490</u> | -0.61           | 0.25          | -0.05           | 0.91          | Armado repeat-containing protein 1                          | Q9D7A8     |
| Armc10   | -0.0006                          | -1.00           | 0.34          | 0.27            | 0.99          | 0.20            | 0.62          | -0.74           | 0.47          | Armado repeat-containing protein 10                         | Q9D0L7     |
| Armc6    | 0.0000                           | 0.04            | 0.88          | -0.08           | 0.9           | 0.15            | 0.47          | -0.03           | 0.93          | Armado repeat-containing protein 6                          | Q8BNU0     |
| Armcx3   | -0.0301                          | 0.84            | 0.59          | -0.55           | 0.52          | -0.45           | 0.6           | 0.29            | 0.93          | Armado repeat-containing X-linked protein 3                 | Q8BHS6     |
| Arpc1a   | -0.0140                          | -0.34           | <u>0.0160</u> | 0.07            | 0.47          | 0.06            | 0.62          | -0.28           | 0.052         | Actin-related protein 2/3 complex subunit 1A                | Q9R0Q6     |
| Arpc2    | 0.0010                           | -0.26           | 0.051         | -0.02           | 0.7           | 0.06            | 0.58          | -0.29           | <u>0.0048</u> | Actin-related protein 2/3 complex subunit 2                 | Q9CVB6     |
| Arpc3    | -0.0835                          | -0.36           | <u>0.0240</u> | 0.18            | 0.16          | 0.03            | 0.92          | -0.18           | 0.21          | Actin-related protein 2/3 complex subunit 3                 | Q9JM76     |
| Arpc4    | -0.0057                          | -0.32           | 0.11          | 0.07            | 0.54          | -0.06           | 0.73          | -0.25           | <u>0.0070</u> | Actin-related protein 2/3 complex subunit 4                 | P59999     |
| Arpc5    | -0.0001                          | -0.31           | 0.79          | 0.04            | 0.82          | -0.05           | 0.79          | -0.27           | 0.5           | Actin-related protein 2/3 complex subunit 5                 | Q9CPW4     |



Table S2: Differentially expressed proteins in cerebral cortex (*continued*)

| gene   | $\frac{\pi_{TW/EW} \times \pi_{TF/TW}}$ | log2FC<br>TW/EW | padj<br>TW/EW | log2FC<br>TF/TW | padj<br>TF/TW | log2FC<br>EF/EW | padj<br>EF/EW | log2FC<br>TF/EW | padj<br>TF/EW | description                                                             | accession  |
|--------|-----------------------------------------|-----------------|---------------|-----------------|---------------|-----------------|---------------|-----------------|---------------|-------------------------------------------------------------------------|------------|
| Arpc5l | 0.0005                                  | -0.22           | <u>0.0030</u> | -0.01           | 0.81          | 0.02            | 0.97          | -0.23           | <u>0.0030</u> | Actin-related protein 2/3 complex subunit 5-like protein                | Q9D898     |
| Arrb1  | -0.0016                                 | 2.53            | 0.98          | -2.65           | 0.94          | -0.16           | 0.87          | -0.12           | 0.8           | Beta-arrestin-1                                                         | J3QNU6     |
| Arsb   | -0.0013                                 | -0.85           | 0.58          | 0.09            | 0.85          | -2.50           | 0.16          | -0.76           | 0.62          | Arylsulfatase B                                                         | A0A0R4J138 |
| Arvcf  | 0.0016                                  | 0.57            | 0.8           | 0.57            | 0.89          | 1.10            | 0.42          | 1.14            | 0.5           | Armadillo repeat protein deleted in velo-cardio-facial syndrome homolog | P98203     |
| Arxes2 | 0.0201                                  | 0.15            | 0.62          | 0.61            | 0.087         | -0.09           | 0.85          | 0.75            | <u>0.0280</u> | Adipocyte-related X-chromosome expressed sequence 2                     | C0HK80     |
| Asap1  | 0.0072                                  | 0.76            | <u>0.0460</u> | 0.05            | 0.72          | 0.56            | 0.39          | 0.81            | 0.14          | Arf-GAP with SH3 domain, ANK repeat and PH domain-containing protein 1  | E9QN63     |
| Asap2  | -0.1366                                 | -0.50           | 0.22          | 0.54            | 0.17          | -0.83           | 0.12          | 0.04            | 0.79          | Arf-GAP with SH3 domain, ANK repeat and PH domain-containing protein 2  | E9PX52     |
| Asrgl1 | 0.0000                                  | -0.22           | 1             | -0.16           | 0.1           | -0.09           | 0.7           | -0.38           | <u>0.0015</u> | Isospartyl peptidase/L-asparaginase                                     | Q8C0M9     |
| Ass1   | -0.0003                                 | 0.04            | 0.74          | -0.17           | 0.47          | -0.23           | 0.11          | -0.13           | 0.26          | Argininosuccinate synthase                                              | P16460     |
| Astn1  | -0.0046                                 | -0.23           | 0.45          | 0.25            | 0.59          | 0.15            | 0.76          | 0.02            | 0.9           | Astrotactin-1                                                           | Q61137     |
| Astn2  | 0.0000                                  | -0.01           | 0.87          | 0.13            | 0.59          | -0.06           | 0.83          | 0.12            | 0.72          | Astrotactin-2                                                           | Q80Z10     |
| Atad1  | -0.1533                                 | -0.39           | 0.35          | 0.64            | <u>0.0450</u> | 0.17            | 0.8           | 0.25            | 0.18          | Outer mitochondrial transmembrane helix translocase                     | A0A494B9L7 |
| Atad3  | -1.8814                                 | 0.47            | <u>0.0190</u> | -0.74           | <u>0.0007</u> | -0.23           | 0.44          | -0.27           | 0.17          | ATPase family AAA domain-containing protein 3                           | Q925I1     |
| Atat1  | -0.0129                                 | 0.14            | 0.47          | -0.51           | 0.28          | 0.38            | 0.38          | -0.37           | 0.67          | Alpha-tubulin N-acetyltransferase 1                                     | Q8K341     |
| Atg2b  | -0.8207                                 | 0.58            | <u>0.0300</u> | -0.58           | <u>0.0250</u> | 0.12            | 0.51          | 0.00            | 0.98          | Autophagy-related protein 2 homolog B                                   | Q80XK6     |
| Atg3   | -0.2542                                 | -1.18           | 0.38          | 1.22            | 0.38          | 0.39            | 0.55          | 0.04            | 1             | Ubiquitin-like-conjugating enzyme ATG3                                  | Q9CPX6     |
| Atic   | -0.0004                                 | -0.41           | 0.45          | 0.07            | 0.91          | -0.43           | 0.25          | -0.34           | 0.17          | Bifunctional purine biosynthesis protein ATIC                           | Q9CWJ9     |
| Atp1a3 | -0.0114                                 | -0.23           | <u>0.0140</u> | 0.12            | 0.6           | -0.12           | <u>0.0070</u> | -0.10           | <u>0.0014</u> | Sodium/potassium-transporting ATPase subunit alpha                      | A0A0G2JGX4 |
| Atp1b1 | 0.0038                                  | -0.16           | 0.34          | -0.06           | 0.14          | -0.14           | 0.28          | -0.22           | <u>0.0110</u> | Sodium/potassium-transporting ATPase subunit beta-1                     | P14094     |
| Atp1b2 | -0.0048                                 | -0.47           | <u>0.0270</u> | 0.05            | 0.74          | -0.45           | 0.14          | -0.42           | <u>0.0046</u> | Sodium/potassium-transporting ATPase subunit beta-2                     | P14231     |
| Atp1b3 | 0.0175                                  | -0.29           | 0.19          | -0.39           | 0.61          | -0.23           | 0.31          | -0.67           | 0.13          | Sodium/potassium-transporting ATPase subunit beta-3                     | P97370     |
| Atp2a2 | -0.0407                                 | 0.21            | 0.15          | -0.19           | 0.058         | -0.09           | 0.43          | 0.03            | 0.92          | Sarcoplasmic/endoplasmic reticulum calcium ATPase 2                     | O55143     |
| Atp2b1 | 0.0025                                  | -0.08           | 0.29          | -0.04           | <u>0.0350</u> | -0.07           | 0.44          | -0.13           | 0.41          | Plasma membrane calcium-transporting ATPase 1                           | G5E829     |
| Atp2b4 | 0.0039                                  | -0.25           | 0.17          | -0.07           | 0.51          | -0.32           | 0.053         | -0.32           | <u>0.0020</u> | Calcium-transporting ATPase                                             | E9Q828     |
| Atp5c1 | -21.0505                                | 1.08            | <u>0.0005</u> | -1.48           | <u>0.0001</u> | -0.12           | 0.76          | -0.40           | 0.37          | ATP synthase subunit gamma                                              | A2AKU9     |

Table S2: Differentially expressed proteins in cerebral cortex (*continued*)

| gene     | $\pi_{TW/EW} \times \pi_{TF/TW}$ | log2FC<br>TW/EW | padj<br>TW/EW | log2FC<br>TF/TW | padj<br>TF/TW | log2FC<br>EF/EW | padj<br>EF/EW | log2FC<br>TF/EW | padj<br>TF/EW | description                                            | accession  |
|----------|----------------------------------|-----------------|---------------|-----------------|---------------|-----------------|---------------|-----------------|---------------|--------------------------------------------------------|------------|
| Atp5flb  | -2.1888                          | 0.38            | <u>0.0001</u> | -0.36           | <u>0.0001</u> | -0.07           | 0.056         | 0.01            | 0.34          | ATP synthase subunit beta, mitochondrial               | P56480     |
| Atp5fld  | -0.0076                          | 0.25            | 0.5           | -0.24           | 0.38          | 0.27            | 0.18          | 0.01            | 0.89          | ATP synthase subunit delta,<br>mitochondrial           | Q9D3D9     |
| Atp5fle  | 0.0000                           | -0.09           | 0.81          | 0.03            | 0.93          | -0.01           | 0.48          | -0.07           | 0.81          | ATP synthase subunit epsilon,<br>mitochondrial         | P56382     |
| Atp5me   | -0.7023                          | 0.47            | <u>0.0020</u> | -0.33           | <u>0.0210</u> | 0.17            | 0.95          | 0.14            | 0.17          | ATP synthase subunit e, mitochondrial                  | Q06185     |
| Atp5mf   | -0.2560                          | 0.47            | 0.083         | -0.41           | 0.059         | 0.23            | 0.48          | 0.06            | 0.77          | ATP synthase subunit f, mitochondrial                  | P56135     |
| Atp5mg   | -0.0649                          | 0.30            | 0.088         | -0.24           | 0.14          | 0.16            | 0.77          | 0.05            | 0.71          | ATP synthase subunit g, mitochondrial                  | Q9CPQ8     |
| Atp5pb   | -0.0868                          | 0.16            | 0.11          | -0.30           | <u>0.0130</u> | 0.00            | 0.7           | -0.14           | 0.26          | ATP synthase F(0) complex subunit B1,<br>mitochondrial | Q9CQQ7     |
| Atp5pd   | -0.0264                          | 0.18            | 0.13          | -0.18           | 0.12          | 0.15            | 0.17          | 0.00            | 0.8           | ATP synthase subunit d, mitochondrial                  | Q9DCX2     |
| Atp5po   | -9.7920                          | 0.72            | <u>0.0001</u> | -0.85           | <u>0.0001</u> | -0.04           | 0.32          | -0.14           | 0.43          | ATP synthase subunit O, mitochondrial                  | Q9DB20     |
| Atp6ap2  | -0.0004                          | -0.09           | 0.76          | 0.16            | 0.6           | 0.13            | 0.7           | 0.06            | 0.83          | Renin receptor                                         | Q9CYN9     |
| Atp6v0a1 | -0.0449                          | -0.42           | 0.057         | 0.21            | 0.39          | 0.06            | 0.55          | -0.22           | 0.25          | V-type proton ATPase subunit a                         | K3W4T3     |
| Atp6v0d1 | -0.5401                          | -0.29           | <u>0.0210</u> | 0.37            | <u>0.0010</u> | 0.09            | 0.95          | 0.08            | 0.24          | V-type proton ATPase subunit d 1                       | P51863     |
| Atp6v1a  | -0.0115                          | -0.39           | 0.29          | 0.13            | 0.38          | 0.10            | 0.66          | -0.25           | 0.086         | V-type proton ATPase catalytic subunit A               | P50516     |
| Atp6v1b2 | -0.0331                          | -0.31           | 0.23          | 0.32            | 0.3           | 0.13            | 0.81          | 0.01            | 0.79          | V-type proton ATPase subunit B, brain<br>isoform       | P62814     |
| Atp6v1c1 | -0.3705                          | -0.41           | <u>0.0044</u> | 0.40            | 0.11          | 0.17            | 0.6           | -0.01           | 0.45          | V-type proton ATPase subunit C 1                       | Q9Z1G3     |
| Atp6v1d  | -0.0012                          | 0.03            | 0.4           | -0.10           | 0.095         | -0.03           | 0.8           | -0.07           | 0.4           | V-type proton ATPase subunit D                         | P57746     |
| Atp6v1e1 | -0.5518                          | -0.27           | <u>0.0030</u> | 0.27            | <u>0.0010</u> | 0.24            | 0.8           | 0.00            | 0.98          | V-type proton ATPase subunit E 1                       | P50518     |
| Atp6v1f  | -0.2578                          | -0.48           | 0.074         | 0.42            | 0.074         | 0.12            | 0.46          | -0.06           | 0.64          | V-ATPase 14 kDa subunit                                | A0A0N4SVE1 |
| Atp6v1g1 | -0.0003                          | -0.36           | 0.88          | 0.34            | 0.91          | 0.34            | 0.51          | -0.02           | 0.77          | V-type proton ATPase subunit G 1                       | Q9CR51     |
| Atp6v1g2 | -0.0005                          | -0.15           | 0.56          | 0.12            | 0.79          | 0.28            | 0.46          | -0.03           | 0.36          | V-type proton ATPase subunit G 2                       | Q9WTT4     |
| Atp6v1h  | -0.0195                          | -0.36           | <u>0.0310</u> | 0.13            | 0.53          | -0.08           | 0.23          | -0.23           | <u>0.0006</u> | V-type proton ATPase subunit H                         | A0A0A6YX18 |
| Atp8a1   | -1.5390                          | -0.45           | <u>0.0010</u> | 0.38            | <u>0.0010</u> | 0.06            | 1             | -0.07           | 0.53          | Phospholipid-transporting ATPase 1A                    | P70704     |
| Atpif1   | 0.0041                           | 0.12            | 0.25          | 0.13            | 0.37          | 0.17            | 0.73          | 0.25            | <u>0.0010</u> | ATP synthase F1 subunit epsilon                        | E9PV44     |
| Atxn2    | -0.0011                          | 0.56            | <u>0.0200</u> | -0.02           | 0.88          | -0.05           | 0.53          | 0.54            | <u>0.0070</u> | Ataxin-2                                               | E9QM77     |
| Atxn2l   | 0.0147                           | 0.34            | 0.13          | 0.22            | 0.6           | -0.03           | 0.73          | 0.56            | 0.73          | Ataxin-2-like protein                                  | A0A0U1RPL0 |
| Auh      | 0.0530                           | 0.37            | <u>0.0100</u> | 0.18            | 0.4           | 0.66            | <u>0.0001</u> | 0.55            | <u>0.0002</u> | Methylglutaconyl-CoA hydratase,<br>mitochondrial       | Q9JLZ3     |
| Avl9     | 0.0030                           | -0.51           | 0.38          | -0.34           | 0.91          | -0.60           | 0.2           | -0.85           | <u>0.0280</u> | Late secretory pathway protein AVL9<br>homolog         | Q80U56     |
| Bag2     | -0.2976                          | 0.48            | 0.38          | -0.95           | <u>0.0280</u> | 0.02            | 1             | -0.47           | 0.094         | BAG family molecular chaperone<br>regulator 2          | Q91YN9     |
| Bag4     | 0.0109                           | 0.12            | 0.52          | 0.32            | 0.1           | 0.24            | 0.29          | 0.44            | 0.06          | BAG family molecular chaperone<br>regulator 4          | Q8CI61     |
| Bag6     | -2.9946                          | 2.25            | 0.33          | -4.46           | 0.24          | 1.37            | 0.56          | -2.21           | 0.62          | BCL2-associated athanogene 6                           | Q3UF95     |

Table S2: Differentially expressed proteins in cerebral cortex (*continued*)

| gene    | $\pi_{TW/EW} \times \pi_{TF/TW}$ | log2FC<br>TW/EW | padj<br>TW/EW | log2FC<br>TF/TW | padj<br>TF/TW | log2FC<br>EF/EW | padj<br>EF/EW | log2FC<br>TF/EW | padj<br>TF/EW | description                                                  | accession  |
|---------|----------------------------------|-----------------|---------------|-----------------|---------------|-----------------|---------------|-----------------|---------------|--------------------------------------------------------------|------------|
| Baiap2  | -2.8224                          | 0.56            | <u>0.0010</u> | -0.56           | <u>0.0010</u> | 0.55            | <u>0.0002</u> | 0.00            | 1             | Brain-specific angiogenesis inhibitor 1-associated protein 2 | B1AZ46     |
| Basp1   | -0.0014                          | 0.03            | 0.88          | -0.37           | <u>0.0055</u> | -0.03           | 0.27          | -0.34           | <u>0.0030</u> | Brain acid soluble protein 1                                 | Q91XV3     |
| Bcan    | 0.3615                           | -0.51           | <u>0.0001</u> | -0.20           | 0.13          | -0.91           | <u>0.0009</u> | -0.71           | <u>0.0010</u> | Brevican core protein                                        | Q61361     |
| Bcap29  | -0.0322                          | -0.08           | 0.56          | 0.63            | <u>0.0029</u> | 0.22            | 0.09          | 0.55            | <u>0.0010</u> | B-cell receptor-associated protein 29                        | Q61334     |
| Bcar1   | -0.0004                          | 0.25            | 0.69          | -0.12           | 0.81          | -0.37           | 0.56          | 0.13            | 0.84          | Breast cancer anti-estrogen resistance protein 1             | Q61140     |
| Bcas1   | -0.0602                          | 0.78            | <u>0.0011</u> | -0.23           | 0.77          | 0.20            | 0.61          | 0.56            | <u>0.0003</u> | Breast carcinoma-amplified sequence 1 homolog                | Q80YN3     |
| Bcas2   | -0.3374                          | 2.08            | 0.73          | -3.15           | 0.42          | -1.57           | 0.52          | -1.07           | 0.53          | Pre-mRNA-splicing factor SPF27                               | Q9D287     |
| Bcas3   | -0.0522                          | 0.32            | 0.17          | -0.23           | 0.12          | 0.03            | 0.75          | 0.09            | 0.7           | Bcas3 protein                                                | Q0VF62     |
| Bckdha  | -0.0006                          | -0.18           | 0.54          | 0.08            | 0.69          | -0.22           | 0.52          | -0.10           | 0.78          | 2-oxoisovalerate dehydrogenase subunit alpha, mitochondrial  | P50136     |
| Bckdk   | -0.2471                          | 0.28            | 0.26          | -0.70           | <u>0.0070</u> | 0.36            | 0.095         | -0.41           | <u>0.0062</u> | Protein-serine/threonine kinase                              | A0A0U1RNL7 |
| Bcl2l13 | -0.4107                          | 0.37            | 0.32          | -1.90           | 0.066         | -0.73           | 0.38          | -1.53           | 0.13          | Bcl-2-like protein 13                                        | P59017     |
| Bcr     | -0.0415                          | 0.19            | 0.51          | -0.57           | <u>0.0490</u> | -0.40           | 0.25          | -0.39           | 0.21          | Breakpoint cluster region protein                            | Q6PAJ1     |
| Bdh1    | -0.0077                          | 0.26            | 0.16          | -0.12           | 0.49          | 0.03            | 0.86          | 0.13            | 0.3           | D-beta-hydroxybutyrate dehydrogenase, mitochondrial          | Q80XN0     |
| Begain  | -0.4486                          | 0.79            | 0.49          | -1.57           | 0.068         | -0.42           | 0.69          | -0.78           | 0.2           | Brain-enriched guanylate kinase-associated protein           | F8WIG2     |
| Blvrb   | -0.5537                          | -0.74           | <u>0.0030</u> | 0.36            | 0.15          | 0.19            | 0.35          | -0.38           | <u>0.0360</u> | Flavin reductase (NADPH)                                     | Q923D2     |
| Bola2   | -0.0372                          | -0.50           | <u>0.0040</u> | 0.14            | 0.6           | -0.19           | 0.41          | -0.36           | <u>0.0040</u> | Bola-like protein 2                                          | Q8BGS2     |
| Bphl    | -3.7806                          | 0.65            | <u>0.0390</u> | -1.37           | <u>0.0010</u> | -0.46           | 0.35          | -0.73           | 0.26          | Valacyclovir hydrolase                                       | Q8R164     |
| Bpnt1   | 0.0003                           | -0.30           | 0.22          | -0.02           | 0.86          | -1.16           | 0.052         | -0.32           | <u>0.0440</u> | 3'(2'),5'-bisphosphate nucleotidase 1                        | A0A1B0GRV0 |
| Brinp1  | 0.0000                           | 0.01            | 0.72          | -0.06           | 0.62          | 0.30            | 0.092         | -0.05           | 0.73          | BMP/retinoic acid-inducible neural-specific protein 1        | Q920P3     |
| Brk1    | 0.0000                           | -0.06           | 0.36          | 0.00            | 0.9           | 0.02            | 0.8           | -0.05           | 0.37          | Protein BRICK1                                               | Q91VR8     |
| Brsk1   | -1.8558                          | 0.94            | <u>0.0310</u> | -0.78           | <u>0.0210</u> | -0.38           | 0.36          | 0.16            | 0.71          | Serine/threonine-protein kinase BRSK1                        | D3Z5P0     |
| Brsk2   | -9.1398                          | 2.01            | 0.24          | -6.04           | 0.061         | -3.16           | 0.15          | -4.03           | 0.056         | Serine/threonine-protein kinase BRSK2 (Fragment)             | G3UXM5     |
| Bsg     | -0.0073                          | -0.17           | 0.26          | 0.14            | 0.3           | -0.11           | 0.6           | -0.03           | 0.81          | Basigin                                                      | K3W4Q8     |
| Bsn     | -40.2529                         | 1.28            | <u>0.0001</u> | -2.04           | <u>0.0001</u> | -0.53           | <u>0.0010</u> | -0.77           | <u>0.0001</u> | Protein bassoon                                              | O88737     |
| Btbd17  | -0.0005                          | 0.35            | 0.32          | -0.01           | 0.53          | 0.76            | <u>0.0240</u> | 0.34            | 0.7           | BTB/POZ domain-containing protein 17                         | Q9DB72     |
| Btbd8   | -0.0504                          | 0.63            | 0.26          | -0.30           | 0.35          | 0.26            | 0.59          | 0.33            | 0.82          | BTB/POZ domain-containing protein 8                          | A0A1D5RL96 |
| Bub3    | -2.4435                          | -3.56           | 0.47          | 4.23            | 0.32          | -3.14           | 0.62          | 0.67            | 0.76          | Mitotic checkpoint protein BUB3                              | A0A140LHA2 |
| C1qc    | -0.0212                          | 0.45            | 0.73          | -0.80           | 0.37          | -0.20           | 0.48          | -0.34           | 0.55          | Complement C1q subcomponent subunit C                        | Q02105     |
| C1qtnf4 | -0.2373                          | 1.29            | 0.31          | -0.55           | 0.22          | 0.93            | 0.53          | 0.74            | 0.78          | Complement C1q tumor necrosis factor-related protein 4       | Q8R066     |

Table S2: Differentially expressed proteins in cerebral cortex (*continued*)

| gene     | $\pi_{TW/EW} \times \pi_{TF/TW}$ | log2FC<br>TW/EW | padj<br>TW/EW | log2FC<br>TF/TW | padj<br>TF/TW | log2FC<br>EF/EW | padj<br>EF/EW | log2FC<br>TF/EW | padj<br>TF/EW | description                                                            | accession  |
|----------|----------------------------------|-----------------|---------------|-----------------|---------------|-----------------|---------------|-----------------|---------------|------------------------------------------------------------------------|------------|
| C2cd2l   | 0.0002                           | -0.03           | 0.9           | -0.23           | 0.27          | -0.15           | 0.23          | -0.26           | 0.067         | Phospholipid transfer protein C2CD2L                                   | Q80X80     |
| C2cd4c   | 0.0021                           | -0.07           | 0.37          | -0.30           | 0.58          | -0.56           | <u>0.0400</u> | -0.37           | 0.089         | C2 calcium-dependent domain-containing protein 4C                      | Q5HZI2     |
| Ca2      | 0.0007                           | -0.25           | 0.14          | -0.04           | 0.83          | -0.68           | <u>0.0001</u> | -0.28           | <u>0.0100</u> | Carbonic anhydrase 2                                                   | P00920     |
| Cab39    | -0.0008                          | 0.17            | 0.14          | -0.03           | 0.67          | -0.36           | 0.061         | 0.14            | 0.13          | Calcium-binding protein 39                                             | Q06138     |
| Cacna1a  | -1.9055                          | 0.92            | 0.23          | -1.91           | <u>0.0200</u> | -0.54           | 0.19          | -0.98           | <u>0.0190</u> | Voltage-dependent P/Q-type calcium channel subunit alpha               | A0A571BET0 |
| Cacna1b  | 0.0002                           | 0.10            | 0.86          | 0.18            | 0.69          | -0.02           | 0.94          | 0.28            | 0.45          | Voltage-dependent N-type calcium channel subunit alpha                 | A2AIR7     |
| Cacna1e  | -0.5197                          | 0.58            | 0.19          | -0.98           | 0.054         | -0.16           | 0.76          | -0.40           | 0.4           | Voltage-dependent R-type calcium channel subunit alpha                 | A0A087WS83 |
| Cacna2d1 | -0.0082                          | 0.17            | 0.71          | -0.38           | 0.14          | -0.03           | 0.27          | -0.21           | 0.19          | Voltage-dependent calcium channel subunit alpha-2/delta-1              | E9Q1X8     |
| Cacna2d2 | -0.0034                          | 0.11            | 0.8           | -1.11           | 0.52          | -5.07           | 0.087         | -1.00           | 0.63          | Voltage-dependent calcium channel subunit alpha-2/delta-2              | E9Q683     |
| Cacna2d3 | -0.1189                          | 0.94            | 0.21          | -0.62           | 0.5           | 0.39            | 0.24          | 0.32            | 0.54          | Voltage-dependent calcium channel subunit alpha-2/delta-3              | Q9Z1L5     |
| Cacnb3   | -1.6155                          | 5.40            | <u>0.0280</u> | -0.32           | 0.25          | 5.32            | <u>0.0280</u> | 5.08            | 0.15          | Calcium channel voltage-dependent subunit beta 3                       | A0A2U3TZ49 |
| Cacnb4   | -0.0253                          | 0.27            | 0.94          | -1.45           | <u>0.0039</u> | -0.52           | 0.26          | -1.18           | <u>0.0010</u> | Voltage-dependent L-type calcium channel subunit beta-4                | Q8R0S4     |
| Cacng2   | 0.0000                           | 0.03            | 0.62          | 0.03            | 0.86          | 0.32            | <u>0.0260</u> | 0.06            | 0.53          | Voltage-dependent calcium channel gamma-2 subunit                      | O88602     |
| Cacng3   | 0.0050                           | -0.19           | 0.23          | -0.11           | 0.42          | 0.17            | 0.22          | -0.31           | <u>0.0070</u> | Voltage-dependent calcium channel gamma-3 subunit                      | Q9JJV5     |
| Cacng8   | 0.0001                           | -0.15           | 0.96          | -0.15           | 0.73          | 0.00            | 0.96          | -0.29           | 0.69          | Voltage-dependent calcium channel gamma-8 subunit                      | F7CZ64     |
| Cacybp   | -0.0513                          | 0.36            | 0.2           | -0.31           | 0.22          | 0.15            | 0.6           | 0.06            | 0.93          | Calcyclin-binding protein                                              | Q9CXW3     |
| Cad      | -0.0016                          | 0.59            | 0.52          | -0.08           | 0.76          | -0.49           | 0.72          | 0.51            | 1             | CAD protein                                                            | B2RQC6     |
| Cadm2    | 0.0040                           | -0.48           | <u>0.0007</u> | -0.04           | 0.86          | -0.09           | 0.53          | -0.51           | <u>0.0020</u> | Cell adhesion molecule 2 (Fragment)                                    | G3UZM4     |
| Cadm3    | -0.0389                          | -0.38           | 0.59          | 0.72            | 0.24          | 0.87            | 0.51          | 0.34            | 0.65          | Cell adhesion molecule 3                                               | K4DI58     |
| Cadm4    | -0.0050                          | 0.04            | 0.83          | -1.49           | 0.09          | 0.55            | 0.51          | -1.45           | 0.21          | Cell adhesion molecule 4                                               | Q8R464     |
| Cadps    | -0.0115                          | 0.37            | 0.28          | -0.12           | 0.34          | 0.18            | 0.65          | 0.25            | 0.73          | Calcium-dependent secretion activator 1                                | K4DI76     |
| Cadps2   | -0.0191                          | 0.45            | 0.088         | -0.15           | 0.54          | 0.20            | 0.37          | 0.30            | 0.18          | Calcium-dependent secretion activator 2                                | E9Q5C0     |
| Calcoco1 | -0.0047                          | 0.85            | <u>0.0130</u> | -0.03           | 0.8           | 0.77            | <u>0.0100</u> | 0.82            | <u>0.0280</u> | Calcium-binding and coiled-coil domain-containing protein 1 (Fragment) | A0A2R8VHU8 |
| Cald1    | -0.2261                          | 0.19            | 0.19          | -0.55           | <u>0.0010</u> | 0.17            | 0.41          | -0.36           | <u>0.0390</u> | Caldesmon 1                                                            | Q8VCQ8     |
| Calm2    | 0.0083                           | -0.29           | 0.47          | -0.73           | 0.76          | -0.43           | 0.97          | -1.02           | 0.56          | Calmodulin-2                                                           | P0DP27     |
| Calr     | -0.0264                          | -0.19           | 0.13          | 0.17            | 0.12          | -0.22           | <u>0.0170</u> | -0.02           | 0.98          | Calreticulin                                                           | P14211     |

Table S2: Differentially expressed proteins in cerebral cortex (*continued*)

| gene    | $\pi_{TW/EW} \times \pi_{TF/TW}$ | log2FC<br>TW/EW | padj<br>TW/EW | log2FC<br>TF/TW | padj<br>TF/TW | log2FC<br>EF/EW | padj<br>EF/EW | log2FC<br>TF/EW | padj<br>TF/EW | description                                                       | accession  |
|---------|----------------------------------|-----------------|---------------|-----------------|---------------|-----------------|---------------|-----------------|---------------|-------------------------------------------------------------------|------------|
| Camk1d  | 0.0085                           | -0.49           | 0.44          | -0.26           | 0.65          | -0.70           | <u>0.0220</u> | -0.74           | 0.06          | Calcium/calmodulin-dependent protein kinase type 1D               | Q8BW96     |
| Camk2a  | -11.2102                         | 1.31            | 0.17          | -2.78           | <u>0.0001</u> | -0.66           | <u>0.0040</u> | -1.47           | <u>0.0001</u> | Calcium/calmodulin-dependent protein kinase type II subunit alpha | P11798     |
| Camk2b  | -23.9830                         | 2.72            | 0.21          | -4.82           | <u>0.0020</u> | -1.63           | 0.051         | -2.10           | <u>0.0010</u> | Calcium/calmodulin-dependent protein kinase type II subunit beta  | P28652     |
| Camk2d  | -1.5364                          | 0.85            | 0.5           | -2.38           | <u>0.0030</u> | -0.86           | <u>0.0140</u> | -1.54           | <u>0.0010</u> | Calcium/calmodulin-dependent protein kinase                       | E9Q1W0     |
| Camk4   | -0.0140                          | 0.08            | 0.44          | -0.30           | <u>0.0230</u> | 0.12            | 0.43          | -0.23           | 0.11          | Calcium/calmodulin-dependent protein kinase type IV               | P08414     |
| Camkk1  | -0.0035                          | 0.09            | 0.94          | -1.68           | 0.14          | -1.11           | 0.25          | -1.59           | <u>0.0430</u> | Calcium/calmodulin-dependent protein kinase kinase 1 (Fragment)   | B1AUD3     |
| Camkk2  | -0.0150                          | 0.09            | 0.15          | -0.18           | 0.075         | -0.02           | 0.55          | -0.09           | 0.48          | Calcium/calmodulin-dependent protein kinase kinase 2 (Fragment)   | A0A0G2JET2 |
| Camkv   | 0.0001                           | -0.05           | 0.98          | -0.42           | 0.47          | -0.36           | 0.53          | -0.47           | 0.34          | CaM kinase-like vesicle-associated protein                        | A0A0A6YW88 |
| Camsap2 | -0.1825                          | 0.74            | 0.17          | -0.63           | 0.31          | -0.18           | 0.7           | 0.11            | 0.53          | Calmodulin-regulated spectrin-associated protein 2                | A0A0A6YY67 |
| Camsap3 | -1.0946                          | 1.27            | <u>0.0440</u> | -0.69           | 0.12          | 0.69            | 0.14          | 0.58            | 0.4           | Calmodulin-regulated spectrin-associated protein 3                | Q80VC9     |
| Cand1   | -0.0005                          | -0.27           | <u>0.0110</u> | 0.21            | 0.99          | 0.10            | 0.35          | -0.06           | 0.46          | Cullin-associated NEDD8-dissociated protein 1                     | Q6ZQ38     |
| Cand2   | -0.2046                          | 0.28            | 0.24          | -0.90           | <u>0.0490</u> | -0.43           | 0.087         | -0.62           | 0.07          | Cullin-associated NEDD8-dissociated protein 2                     | Q6ZQ73     |
| Canx    | -0.0026                          | -0.25           | 0.19          | 0.09            | 0.69          | -0.16           | 0.61          | -0.15           | 0.22          | Calnexin                                                          | P35564     |
| Cap1    | 0.0000                           | -0.08           | 0.94          | 0.13            | 0.71          | 0.30            | <u>0.0190</u> | 0.04            | 0.77          | Adenylyl cyclase-associated protein 1                             | P40124     |
| Cap2    | 0.0017                           | -0.20           | 0.59          | -0.09           | 0.39          | 0.10            | 0.81          | -0.29           | 0.14          | Adenylyl cyclase-associated protein 2                             | Q9CYT6     |
| Capn5   | -0.0027                          | -0.09           | 0.86          | 0.39            | 0.069         | 0.47            | <u>0.0260</u> | 0.31            | 0.17          | Calpain-5                                                         | O08688     |
| Caprin1 | 0.0358                           | 0.21            | 0.3           | 0.34            | 0.11          | 0.28            | <u>0.0280</u> | 0.55            | <u>0.0090</u> | Caprin-1                                                          | Q60865     |
| Capza2  | 0.0005                           | -0.24           | 0.91          | -0.19           | 0.54          | 0.62            | <u>0.0240</u> | -0.44           | 0.45          | F-actin-capping protein subunit alpha-2                           | P47754     |
| Capzb   | -0.0001                          | 0.17            | 0.92          | -0.32           | 0.86          | 0.59            | <u>0.0390</u> | -0.15           | 0.78          | F-actin-capping protein subunit beta                              | P47757     |
| Carmil2 | -0.0089                          | 0.24            | 0.52          | -0.28           | 0.34          | -2.43           | <u>0.0490</u> | -0.04           | 0.76          | Capping protein, Arp2/3 and myosin-I linker protein 2             | Q3V3V9     |
| Cars1   | -0.0413                          | 0.23            | 0.21          | -0.31           | 0.14          | 0.10            | 0.29          | -0.09           | 0.63          | Cysteine-tRNA ligase, cytoplasmic                                 | Q9ER72     |
| Cask    | -0.0006                          | 0.10            | 0.83          | -0.30           | 0.57          | 0.22            | 0.35          | -0.19           | 0.7           | Peripheral plasma membrane protein CASK (Fragment)                | A0A067XG53 |
| Caskin1 | -4.6711                          | 0.85            | <u>0.0160</u> | -1.02           | <u>0.0010</u> | 0.11            | 0.94          | -0.17           | 0.28          | Caskin-1                                                          | Q6P9K8     |
| Cat     | -0.6058                          | -0.53           | <u>0.0040</u> | 0.31            | <u>0.0290</u> | 0.23            | 0.2           | -0.22           | 0.069         | Catalase                                                          | P24270     |
| Cbr1    | -0.0290                          | 0.19            | 0.23          | -0.23           | 0.091         | -0.32           | 0.13          | -0.05           | 0.72          | Carbonyl reductase [NADPH] 1                                      | P48758     |
| Cbr2    | 0.0020                           | -0.15           | 0.3           | -0.12           | 0.61          | 0.48            | 0.051         | -0.27           | 0.23          | Carbonyl reductase [NADPH] 2                                      | P08074     |

Table S2: Differentially expressed proteins in cerebral cortex (*continued*)

| gene     | $\pi_{TW/EW} \times \pi_{TF/TW}$ | log2FC<br>TW/EW | padj<br>TW/EW | log2FC<br>TF/TW | padj<br>TF/TW | log2FC<br>EF/EW | padj<br>EF/EW | log2FC<br>TF/EW | padj<br>TF/EW | description                                           | accession  |
|----------|----------------------------------|-----------------|---------------|-----------------|---------------|-----------------|---------------|-----------------|---------------|-------------------------------------------------------|------------|
| Cbr3     | -0.0034                          | -0.18           | 0.84          | 0.31            | 0.16          | -0.24           | 0.52          | 0.13            | 0.33          | Carbonyl reductase [NADPH] 3                          | Q8K354     |
| Cbr4     | -0.0043                          | 0.29            | 0.66          | -0.38           | 0.61          | -0.03           | 0.99          | -0.09           | 0.98          | Carbonyl reductase family member 4                    | Q91VT4     |
| Cc2d1a   | -1.1515                          | 0.69            | 0.097         | -1.05           | <u>0.0270</u> | 0.74            | 0.11          | -0.36           | 0.47          | Coiled-coil and C2 domain-containing protein 1A       | Q8K1A6     |
| Ccar1    | -0.0604                          | -0.15           | 0.72          | 1.01            | <u>0.0016</u> | -0.50           | 0.57          | 0.87            | <u>0.0024</u> | Cell division cycle and apoptosis regulator protein 1 | Q8CH18     |
| Ccar2    | 0.0000                           | -0.04           | 0.95          | 0.08            | 0.82          | 0.11            | 0.79          | 0.04            | 0.78          | Cell cycle and apoptosis regulator protein 2          | Q8VDP4     |
| Ccdc124  | -0.0128                          | 0.38            | 0.22          | -0.17           | 0.5           | 0.13            | 0.63          | 0.22            | 0.44          | Coiled-coil domain-containing protein 124             | Q9D8X2     |
| Ccdc127  | 0.0065                           | 0.10            | 0.57          | 0.22            | 0.061         | 0.27            | <u>0.0280</u> | 0.32            | <u>0.0050</u> | Coiled-coil domain-containing protein 127 (Fragment)  | E0CYX9     |
| Ccdc158  | -0.2890                          | -0.77           | <u>0.0490</u> | 0.36            | 0.16          | 0.58            | 0.13          | -0.41           | 0.11          | Coiled-coil domain-containing protein 158             | Q8CDI6     |
| Ccdc177  | -1.9484                          | 1.29            | 0.18          | -1.65           | 0.059         | -0.11           | 0.74          | -0.37           | 0.4           | Coiled-coil domain-containing protein 177             | Q3UHB8     |
| Ccdc22   | -0.7900                          | 1.35            | <u>0.0015</u> | -0.55           | 0.42          | 0.02            | 0.84          | 0.80            | 0.58          | Coiled-coil domain-containing protein 22              | Q9JIG7     |
| Ccdc6    | -1.4142                          | 1.50            | 0.09          | -1.25           | 0.19          | 0.24            | 0.93          | 0.26            | 0.96          | Coiled-coil domain-containing protein 6               | D3YZP9     |
| Ccdc88a  | -0.2416                          | 3.18            | 0.71          | -3.05           | 0.68          | -1.23           | 0.56          | 0.13            | 0.97          | Girdin                                                | A0A6I8MX08 |
| Ccdc92   | -0.0384                          | 0.40            | 0.26          | -0.36           | 0.35          | -1.07           | 0.27          | 0.04            | 0.88          | Coiled-coil domain-containing protein 92              | Q8VDN4     |
| Ccdc93   | -0.0671                          | 0.80            | <u>0.0110</u> | -0.17           | 0.56          | -0.12           | 0.64          | 0.63            | <u>0.0050</u> | Coiled-coil domain-containing protein 93              | E9QAD4     |
| Cck      | 0.0013                           | -0.10           | 0.77          | -0.20           | 0.27          | -0.01           | 0.82          | -0.30           | 0.21          | Cholecystokinin                                       | P09240     |
| Ccm2     | -0.4826                          | 0.92            | <u>0.0280</u> | -0.41           | 0.15          | 0.04            | 0.82          | 0.51            | 0.17          | Cerebral cavernous malformations protein 2 homolog    | F7AVU1     |
| CcnY     | -0.0002                          | -0.26           | 0.77          | 0.07            | 0.76          | 0.27            | 0.79          | -0.19           | 0.85          | Cyclin-Y                                              | Q8BGU5     |
| Cct2     | -0.0403                          | -0.30           | 0.45          | 0.47            | 0.15          | 0.01            | 0.95          | 0.17            | 0.54          | T-complex protein 1 subunit beta                      | P80314     |
| Cct3     | -0.0002                          | -0.02           | 0.95          | 0.25            | <u>0.0083</u> | 0.00            | 0.23          | 0.23            | <u>0.0180</u> | T-complex protein 1 subunit gamma                     | P80318     |
| Cct4     | -0.2715                          | -0.15           | 0.061         | 0.38            | <u>0.0001</u> | -0.11           | 0.091         | 0.23            | <u>0.0030</u> | T-complex protein 1 subunit delta                     | P80315     |
| Cct5     | -0.0130                          | -0.39           | 0.21          | 0.33            | 0.71          | -0.12           | 0.48          | -0.07           | 0.38          | T-complex protein 1 subunit epsilon                   | P80316     |
| Cct6a    | 0.0003                           | 0.01            | 0.22          | 0.20            | 0.57          | 0.05            | 0.58          | 0.20            | 0.5           | T-complex protein 1 subunit zeta                      | P80317     |
| Cct7     | -0.0009                          | -0.13           | 0.65          | 0.36            | 0.79          | 0.17            | 1             | 0.23            | 0.56          | T-complex protein 1 subunit eta                       | P80313     |
| Cct8     | -0.1625                          | -0.25           | 0.27          | 0.42            | <u>0.0019</u> | 0.12            | 0.51          | 0.18            | 0.17          | T-complex protein 1 subunit theta                     | P42932     |
| Ccz1     | 0.0000                           | 0.18            | 1             | -3.56           | 1             | 1.23            | 0.51          | -3.38           | 0.71          | Vacuolar fusion protein CCZ1 homolog                  | Q8C1Y8     |
| Cd200    | -0.0086                          | -0.17           | 0.23          | 0.16            | 0.32          | -0.07           | 0.37          | -0.01           | 0.92          | OX-2 membrane glycoprotein                            | E9PZ19     |
| Cd47     | 0.0000                           | -0.28           | 1             | 0.47            | 0.47          | 0.30            | 0.22          | 0.18            | 0.39          | Integrin-associated protein                           | A0A2R8VK70 |
| Cdc23    | -0.0004                          | -0.49           | 0.5           | 0.09            | 0.94          | 0.40            | 0.57          | -0.39           | 0.38          | Cell division cycle protein 23 homolog                | A0A0R4J1W7 |
| Cdc42    | 0.0040                           | -0.17           | 0.24          | -0.09           | 0.38          | -0.01           | 0.7           | -0.26           | <u>0.0160</u> | Cell division control protein 42 homolog              | P60766     |
| Cdc42bpb | -0.4174                          | 0.74            | 0.16          | -0.83           | 0.14          | 0.03            | 0.9           | -0.09           | 0.84          | Serine/threonine-protein kinase MRCK beta             | Q7TT50     |
| Cdc42ep4 | -0.2346                          | 0.27            | 0.054         | -0.35           | <u>0.0110</u> | -0.08           | 0.71          | -0.08           | 0.41          | Cdc42 effector protein 4                              | Q9JM96     |
| Cdc5l    | -18.0636                         | 4.25            | 0.061         | -3.80           | 0.12          | -0.10           | 0.71          | 0.45            | 0.33          | Cell division cycle 5-like protein                    | Q6A068     |

Table S2: Differentially expressed proteins in cerebral cortex (*continued*)

| gene     | $\pi_{TW/EW} \times \pi_{TF/TW}$ | log2FC<br>TW/EW | padj<br>TW/EW | log2FC<br>TF/TW | padj<br>TF/TW | log2FC<br>EF/EW | padj<br>EF/EW | log2FC<br>TF/EW | padj<br>TF/EW | description                                            | accession  |
|----------|----------------------------------|-----------------|---------------|-----------------|---------------|-----------------|---------------|-----------------|---------------|--------------------------------------------------------|------------|
| Cdh10    | -0.0013                          | -0.26           | 0.4           | 0.05            | 0.57          | -0.13           | 0.88          | -0.21           | 0.69          | Cadherin-10                                            | P70408     |
| Cdh11    | -0.0086                          | 0.24            | 0.48          | -0.29           | 0.41          | 0.25            | 0.14          | -0.04           | 0.8           | Cadherin-11                                            | P55288     |
| Cdh13    | 0.0000                           | -0.06           | 0.94          | -0.06           | 0.51          | 0.19            | 0.78          | -0.11           | 0.63          | Cadherin-13                                            | Q9WTR5     |
| Cdh2     | -9.3455                          | 2.27            | <u>0.0410</u> | -2.40           | 0.058         | 0.65            | 0.4           | -0.13           | 0.9           | Cadherin-2                                             | D3YYT0     |
| Cdh6     | -63.9443                         | 7.95            | 0.084         | -7.80           | 0.11          | 1.72            | 0.3           | 0.15            | 0.63          | Cadherin-6                                             | P97326     |
| Cdk5     | -0.0010                          | 0.21            | 0.34          | -0.03           | 0.47          | -0.28           | 0.63          | 0.18            | 0.88          | Cyclin-dependent-like kinase 5                         | P49615     |
| Cdk5r1   | -0.3870                          | 0.55            | 0.13          | -0.65           | 0.06          | -0.41           | 0.2           | -0.10           | 0.6           | Cyclin-dependent kinase 5 activator 1                  | P61809     |
| Cdk5rap3 | -0.0064                          | -0.19           | 0.79          | 0.97            | 0.46          | -0.40           | 0.7           | 0.77            | 0.48          | CDK5 regulatory subunit-associated protein 3           | Q99LM2     |
| Cdkl5    | -0.9441                          | 0.75            | 0.11          | -1.10           | 0.064         | -0.77           | 0.13          | -0.35           | 0.58          | Cyclin-dependent kinase-like 5                         | A0A0G2JF79 |
| Cdkn2aip | 0.0005                           | 0.49            | 0.87          | 0.11            | 0.72          | 1.73            | 0.36          | 0.60            | 0.72          | CDKN2A-interacting protein                             | Q8BI72     |
| Cdv3     | -0.0310                          | 0.53            | 0.37          | -0.39           | 0.45          | 0.21            | 0.65          | 0.14            | 0.76          | Protein CDV3                                           | A0A087WNP6 |
| Celf2    | -0.0011                          | -0.28           | 0.96          | 0.39            | 0.28          | -0.23           | 0.83          | 0.11            | 0.66          | CUGBP Elav-like family member 2                        | Q9Z0H4     |
| Celsr2   | 0.0000                           | 0.00            | 0.51          | -0.16           | 0.22          | 0.35            | 0.25          | -0.16           | 0.48          | Cadherin EGF LAG seven-pass G-type receptor 2          | Q9R0M0     |
| Cend1    | 0.0001                           | 0.10            | 0.82          | 0.08            | 0.65          | 0.38            | 0.47          | 0.17            | 0.31          | Cell cycle exit and neuronal differentiation protein 1 | Q9JKC6     |
| Cenpv    | -7.9217                          | 1.42            | <u>0.0410</u> | -1.49           | <u>0.0020</u> | -0.32           | 0.62          | -0.07           | 0.94          | Centromere protein V                                   | Q9CXS4     |
| Cep162   | -0.1327                          | 0.61            | <u>0.0280</u> | -0.17           | 0.15          | -0.09           | 0.61          | 0.44            | <u>0.0280</u> | Centrosomal protein of 162 kDa                         | Q6ZQ06     |
| Cep170   | -0.0338                          | 0.72            | 0.55          | -0.79           | 0.59          | -0.30           | 0.66          | -0.07           | 0.97          | Centrosomal protein of 170 kDa                         | H7BX26     |
| Cep170b  | -0.1046                          | 0.75            | 0.48          | -1.10           | 0.4           | -0.33           | 0.75          | -0.35           | 0.8           | AW555464 protein                                       | B9EIX2     |
| Cfh      | -0.0088                          | -0.57           | 0.49          | 0.24            | 0.62          | 0.51            | 0.35          | -0.33           | 0.55          | Complement factor H                                    | D6RGQ0     |
| Cfl2     | -0.0002                          | -0.15           | 0.65          | 0.06            | 0.78          | 0.28            | 0.5           | -0.09           | 0.99          | Cofilin-2                                              | P45591     |
| Chchd3   | 0.0529                           | 0.50            | <u>0.0009</u> | 0.08            | 0.37          | 0.25            | 0.46          | 0.59            | <u>0.0130</u> | MICOS complex subunit Mic19                            | Q9CRB9     |
| Chchd6   | -0.0099                          | 0.41            | 0.31          | -0.13           | 0.43          | 0.17            | 0.25          | 0.28            | 0.84          | MICOS complex subunit Mic25                            | Q91VN4     |
| Cherp    | 0.0015                           | -0.27           | 0.34          | -0.05           | 0.58          | -0.19           | 0.43          | -0.32           | 0.088         | Calcium homeostasis endoplasmic reticulum protein      | A0A1D5RL92 |
| Chid1    | -0.1270                          | -0.14           | 0.22          | 0.46            | <u>0.0010</u> | 0.07            | 0.52          | 0.32            | <u>0.0130</u> | Chitinase domain-containing protein 1                  | A0A0R4J242 |
| Chl1     | -0.3924                          | -0.77           | 0.11          | 0.60            | 0.13          | 0.21            | 0.62          | -0.17           | 0.57          | Neural cell adhesion molecule L1-like protein          | P70232     |
| Chmp1a   | -0.5392                          | 0.52            | 0.31          | -1.20           | <u>0.0200</u> | -0.30           | 0.15          | -0.68           | <u>0.0008</u> | Charged multivesicular body protein 1a                 | Q921W0     |
| Chmp1b2  | 0.0156                           | -0.78           | 0.15          | -0.32           | 0.84          | 0.63            | 0.093         | -1.09           | 0.25          | Charged multivesicular body protein 1b-2               | Q9CQD4     |
| Chmp2a   | -0.2139                          | 0.43            | 0.35          | -0.97           | 0.075         | -0.28           | 0.66          | -0.55           | 0.32          | Charged multivesicular body protein 2a                 | Q9DB34     |
| Chmp2b   | -0.5020                          | 0.54            | 0.35          | -1.20           | <u>0.0200</u> | -0.28           | 0.18          | -0.67           | 0.065         | Charged multivesicular body protein 2b                 | Q8BJF9     |
| Chmp4b   | -0.0100                          | 0.52            | 0.22          | -0.32           | 0.81          | 0.11            | 0.44          | 0.20            | 0.16          | Charged multivesicular body protein 4b                 | Q9D8B3     |
| Chmp6    | 0.0000                           | -0.03           | 0.65          | -0.15           | 0.88          | -0.47           | 0.36          | -0.18           | 0.78          | Charged multivesicular body protein 6                  | P0C0A3     |
| Cirbp    | -0.0950                          | 0.40            | 0.13          | -0.36           | 0.18          | -0.01           | 0.83          | 0.04            | 0.92          | Cold-inducible RNA-binding protein                     | P60824     |
| Cisd1    | -0.0816                          | 0.47            | 0.23          | -0.33           | 0.15          | 0.60            | 0.26          | 0.14            | 0.98          | CDGSH iron-sulfur domain-containing protein 1          | Q91WS0     |

Table S2: Differentially expressed proteins in cerebral cortex (*continued*)

| gene   | $\pi_{TW/EW} \times \pi_{TF/TW}$ | log2FC<br>TW/EW | padj<br>TW/EW | log2FC<br>TF/TW | padj<br>TF/TW | log2FC<br>EF/EW | padj<br>EF/EW | log2FC<br>TF/EW | padj<br>TF/EW | description                                                             | accession  |
|--------|----------------------------------|-----------------|---------------|-----------------|---------------|-----------------|---------------|-----------------|---------------|-------------------------------------------------------------------------|------------|
| Cisd3  | -0.5255                          | 0.60            | 0.39          | -0.92           | <u>0.0047</u> | 0.05            | 0.82          | -0.33           | 0.23          | CDGSH iron-sulfur domain-containing protein 3, mitochondrial            | B1AR13     |
| Cit    | -31.9783                         | 1.88            | <u>0.0460</u> | -3.18           | <u>0.0001</u> | -0.82           | 0.19          | -1.30           | <u>0.0460</u> | Citron Rho-interacting kinase                                           | E9QL53     |
| Ckap4  | 0.0365                           | 0.49            | <u>0.0160</u> | 0.17            | 0.57          | 0.43            | <u>0.0320</u> | 0.66            | <u>0.0040</u> | Cytoskeleton-associated protein 4                                       | Q8BMK4     |
| Ckap5  | -0.0008                          | 0.26            | 0.082         | -0.01           | 0.53          | 0.16            | 0.67          | 0.25            | 0.25          | Cytoskeleton-associated protein 5                                       | A0A0R4J0K2 |
| Ckb    | 0.0203                           | -0.36           | 0.72          | -0.26           | <u>0.0300</u> | -0.25           | 0.16          | -0.62           | <u>0.0001</u> | Creatine kinase B-type                                                  | Q04447     |
| Ckmt1  | 0.0000                           | -0.35           | 0.055         | 0.16            | 1             | 0.24            | <u>0.0001</u> | -0.19           | <u>0.0480</u> | Creatine kinase U-type, mitochondrial                                   | P30275     |
| Clasp2 | -6.5565                          | 1.08            | <u>0.0002</u> | -0.88           | <u>0.0140</u> | 0.43            | <u>0.0270</u> | 0.20            | 0.13          | CLIP-associating protein 2                                              | E9Q8N5     |
| Clcn2  | 0.7692                           | 1.38            | 0.12          | 0.56            | 0.083         | -1.07           | 0.78          | 1.95            | <u>0.0100</u> | Chloride channel protein                                                | A0A338P673 |
| Clcn3  | 0.0000                           | 0.02            | 0.96          | -0.09           | 0.59          | -0.61           | 0.15          | -0.07           | 0.69          | Chloride channel protein                                                | Q790S0     |
| Clcn6  | -0.0015                          | -0.08           | 0.81          | 0.29            | 0.2           | 0.71            | <u>0.0280</u> | 0.21            | 0.33          | Chloride channel protein                                                | A2A7F6     |
| Cldn11 | -0.8703                          | 0.37            | 0.42          | -2.81           | <u>0.0060</u> | -0.09           | 0.84          | -2.45           | 0.17          | Claudin-11                                                              | Q60771     |
| Clec4f | -0.0065                          | -0.19           | 0.69          | 0.49            | 0.37          | -0.44           | 0.93          | 0.30            | 0.38          | C-type lectin domain family 4 member F                                  | A0A0R4IZZ5 |
| Clint1 | 0.1711                           | 0.52            | 0.19          | 0.38            | 0.063         | 0.45            | 0.51          | 0.90            | <u>0.0021</u> | Clathrin interactor 1                                                   | Q5SUH7     |
| Clip1  | -0.0001                          | -0.19           | 0.46          | 0.04            | 0.88          | 0.42            | 0.081         | -0.15           | 0.57          | CAP-Gly domain-containing linker protein 1                              | D3Z2Z1     |
| Clip2  | -0.3697                          | 0.66            | <u>0.0008</u> | -0.19           | 0.11          | 0.07            | 0.93          | 0.47            | 0.23          | CAP-Gly domain-containing linker protein 2                              | Q9Z0H8     |
| Clip3  | 0.0066                           | 0.71            | 0.88          | 0.31            | 0.29          | -0.47           | 0.84          | 1.03            | 0.44          | CAP-Gly domain-containing linker protein 3                              | B9EHT4     |
| Clmn   | -2.6798                          | 3.41            | 0.52          | -4.73           | 0.26          | -1.25           | 0.58          | -1.33           | 0.52          | Calmin                                                                  | Q8C5W0     |
| Clpb   | -0.0013                          | 0.04            | 0.92          | -1.45           | 0.23          | -0.19           | 0.81          | -1.40           | 0.15          | Caseinolytic peptidase B protein homolog                                | E9PY58     |
| Clpp   | 0.0042                           | -0.16           | 0.33          | -0.17           | 0.48          | -0.46           | 0.1           | -0.33           | <u>0.0300</u> | ATP-dependent Clp protease proteolytic subunit, mitochondrial           | O88696     |
| Clpx   | -0.0893                          | 2.92            | <u>0.0260</u> | -0.17           | 0.77          | 0.08            | 0.86          | 2.75            | 0.083         | ATP-dependent Clp protease ATP-binding subunit clpX-like, mitochondrial | Q6P8N8     |
| Clstn1 | -0.0075                          | -0.06           | 0.52          | 0.32            | <u>0.0420</u> | -0.14           | 0.28          | 0.26            | 0.056         | Calsynenin-1                                                            | Q9EPL2     |
| Clta   | -0.0158                          | -0.05           | 0.81          | 1.15            | <u>0.0010</u> | -0.01           | 0.95          | 1.10            | <u>0.0010</u> | Clathrin light chain                                                    | B1AWD8     |
| Cltb   | -0.0345                          | -0.06           | 0.75          | 1.31            | <u>0.0003</u> | 0.18            | 0.11          | 1.25            | <u>0.0008</u> | Clathrin light chain B                                                  | Q6IRU5     |
| Cltc   | 0.4466                           | 0.10            | 0.13          | 1.26            | <u>0.0001</u> | 0.08            | 1             | 1.36            | <u>0.0001</u> | Clathrin heavy chain 1                                                  | Q68FD5     |
| Clu    | -0.3310                          | -0.45           | <u>0.0030</u> | 0.24            | 0.061         | 0.20            | 0.28          | -0.21           | 0.1           | Clusterin                                                               | Q06890     |
| Clybl  | -0.0847                          | 0.10            | 0.052         | -0.33           | <u>0.0100</u> | 0.06            | 0.37          | -0.23           | 0.64          | Citramalyl-CoA lyase, mitochondrial                                     | Q8R4N0     |
| Cmpk1  | 0.0021                           | -0.44           | 0.76          | -0.29           | 0.73          | -0.55           | 0.57          | -0.73           | 0.57          | UMP-CMP kinase                                                          | A0A0R4J093 |
| Cmpk2  | 0.0174                           | -0.20           | 0.6           | -0.46           | 0.14          | -1.04           | 0.34          | -0.66           | 0.16          | UMP-CMP kinase 2, mitochondrial                                         | Q3U5Q7     |
| Cndp2  | 0.0038                           | -0.30           | 0.32          | -0.06           | 0.37          | -0.41           | 0.4           | -0.35           | <u>0.0130</u> | Cytosolic non-specific dipeptidase                                      | Q9D1A2     |
| Cnksr2 | -0.4588                          | 0.69            | 0.87          | -3.97           | <u>0.0017</u> | -0.47           | 0.77          | -3.28           | <u>0.0001</u> | Connector enhancer of kinase suppressor of ras 2                        | Q80YA9     |
| Cnn3   | -5.0098                          | 1.15            | 0.11          | -1.67           | <u>0.0019</u> | 0.33            | 0.62          | -0.52           | 0.67          | Calponin                                                                | A0A0G2JDV8 |
| Cnnm1  | -0.0003                          | -0.05           | 0.92          | 0.39            | 0.4           | 0.49            | <u>0.0280</u> | 0.34            | 0.4           | Metal transporter CNNM1                                                 | Q0GA42     |



Table S2: Differentially expressed proteins in cerebral cortex (*continued*)

| gene    | $\pi_{TW/EW} \times \pi_{TF/TW}$ | log2FC<br>TW/EW | padj<br>TW/EW | log2FC<br>TF/TW | padj<br>TF/TW | log2FC<br>EF/EW | padj<br>EF/EW | log2FC<br>TF/EW | padj<br>TF/EW | description                                                   | accession  |
|---------|----------------------------------|-----------------|---------------|-----------------|---------------|-----------------|---------------|-----------------|---------------|---------------------------------------------------------------|------------|
| Cnm3    | -0.4927                          | -3.91           | 0.17          | 0.56            | 0.51          | 1.71            | 0.052         | -3.35           | 0.85          | Metal transporter CNNM3                                       | Q32NY4     |
| Cnot1   | 0.0000                           | 0.02            | 0.81          | -0.01           | 0.96          | -0.29           | 0.58          | 0.01            | 0.82          | CCR4-NOT transcription complex subunit 1                      | A0A1D5RMJ8 |
| Cnot3   | 0.0011                           | -0.04           | 0.9           | -1.25           | 0.34          | -0.28           | 0.57          | -1.28           | 0.27          | CCR4-NOT transcription complex subunit 3                      | Q8K0V4     |
| Cnot9   | -0.0002                          | 0.50            | <u>0.0230</u> | -0.01           | 0.95          | -0.12           | 0.86          | 0.49            | 0.073         | CCR4-NOT transcription complex subunit 9                      | Q9JKY0     |
| Cnp     | 0.0159                           | -0.09           | 0.85          | -0.93           | <u>0.0020</u> | -0.23           | 0.52          | -1.02           | <u>0.0039</u> | 2',3'-cyclic-nucleotide 3'-phosphodiesterase                  | P16330     |
| Cnrip1  | 0.0477                           | -0.17           | 0.57          | -0.38           | <u>0.0009</u> | -0.16           | 0.38          | -0.54           | <u>0.0001</u> | CB1 cannabinoid receptor-interacting protein 1                | Q5M8N0     |
| Cntn1   | 0.0148                           | 0.26            | <u>0.0040</u> | 0.19            | 0.75          | 0.37            | 0.16          | 0.45            | <u>0.0150</u> | Contactin-1                                                   | P12960     |
| Cntn2   | -0.0056                          | 0.09            | 0.56          | -0.27           | 0.12          | 0.03            | 0.92          | -0.18           | <u>0.091</u>  | Contactin-2                                                   | Q61330     |
| Cntn4   | 0.0023                           | -0.64           | <u>0.0013</u> | -0.04           | 0.93          | 0.26            | 0.15          | -0.68           | <u>0.0004</u> | Contactin-4                                                   | Q69Z26     |
| Cntnap1 | -0.0533                          | 0.12            | 0.42          | -0.59           | <u>0.0100</u> | 0.18            | 0.59          | -0.46           | 0.11          | Contactin-associated protein 1                                | O54991     |
| Cntnap2 | 0.0000                           | -0.24           | 0.73          | 0.25            | 0.99          | -0.06           | 0.52          | 0.01            | 0.8           | Contactin-associated protein-like 2                           | E9QNF7     |
| Coa3    | -0.0036                          | 0.25            | 0.2           | -0.10           | 0.62          | 0.48            | 0.35          | 0.15            | 0.37          | Cytochrome c oxidase assembly factor 3 homolog, mitochondrial | Q9D2R6     |
| Coasy   | 0.0036                           | 0.51            | 0.36          | 0.08            | 0.63          | 1.82            | <u>0.0130</u> | 0.58            | 0.12          | Bifunctional coenzyme A synthase                              | Q9DBL7     |
| Cobl    | -0.0035                          | -0.37           | 0.38          | 0.19            | 0.76          | -0.16           | 0.67          | -0.18           | 0.44          | Protein cordon-bleu                                           | G3UWY3     |
| Comm1   | 0.0004                           | 0.03            | 0.97          | 0.92            | 0.061         | -0.14           | 0.64          | 0.95            | <u>0.0280</u> | COMM domain-containing protein 1 (Fragment)                   | G8JL54     |
| Comm2   | -0.0026                          | -0.03           | 0.91          | 0.89            | <u>0.0040</u> | -0.05           | 0.82          | 0.85            | <u>0.0010</u> | COMM domain-containing protein 2                              | Q8BXC6     |
| Comm3   | 0.0080                           | 0.04            | 0.83          | 0.98            | <u>0.0030</u> | 0.29            | 0.45          | 1.02            | <u>0.0030</u> | COMM domain-containing protein 3                              | Q63829     |
| Comm9   | 0.2037                           | 0.15            | 0.36          | 1.02            | <u>0.0010</u> | 0.26            | 0.16          | 1.17            | <u>0.0010</u> | COMM domain-containing protein 9                              | Q8K2Q0     |
| Comtd1  | -2.5440                          | 2.30            | 0.14          | -2.09           | 0.24          | 1.49            | 0.46          | 0.21            | 0.82          | Catechol O-methyltransferase domain-containing protein 1      | Q8BIG7     |
| Copa    | -0.0173                          | 1.01            | 0.24          | -0.32           | 0.82          | 0.26            | 0.42          | 0.70            | 0.22          | Coatomer subunit alpha                                        | F8WHL2     |
| Copb2   | 0.1361                           | 0.18            | 0.27          | 0.65            | <u>0.0090</u> | -0.10           | 0.45          | 0.83            | <u>0.0002</u> | Coatomer subunit beta'                                        | O55029     |
| Cope    | -0.2288                          | -0.25           | 0.25          | 0.82            | <u>0.0140</u> | 0.43            | <u>0.0280</u> | 0.56            | <u>0.0420</u> | Coatomer subunit epsilon                                      | O89079     |
| Copg2   | 0.0000                           | 0.10            | 0.93          | 0.23            | 0.99          | 0.17            | 0.77          | 0.33            | 1             | Coatomer subunit gamma-2                                      | Q9QXK3     |
| Cops2   | -0.0006                          | 0.20            | 0.37          | -0.06           | 0.76          | 0.33            | 0.18          | 0.14            | 0.51          | COP9 signalosome complex subunit 2                            | P61202     |
| Cops4   | 0.0011                           | 0.04            | 0.49          | 0.13            | 0.22          | 0.24            | <u>0.0440</u> | 0.17            | 0.12          | COP9 signalosome complex subunit 4                            | O88544     |
| Cops6   | 0.0206                           | 0.73            | 0.14          | 0.11            | 0.5           | 0.90            | <u>0.0380</u> | 0.84            | 0.067         | COP9 signalosome complex subunit 6                            | D3Z0F5     |
| Cops7a  | -0.0101                          | 0.35            | 0.34          | -0.21           | 0.51          | -0.19           | 0.56          | 0.14            | 0.78          | COP9 signalosome complex subunit 7a                           | Q9CZ04     |
| Cops8   | 0.0071                           | 0.22            | 0.56          | 0.28            | 0.35          | 0.47            | 0.15          | 0.50            | 0.11          | COP9 signalosome complex subunit 8                            | Q8VBV7     |
| Coq6    | -0.0216                          | 0.44            | 0.79          | -1.24           | 0.41          | -0.25           | 0.85          | -0.79           | 0.52          | Ubiquinone biosynthesis monooxygenase COQ6, mitochondrial     | Q8R1S0     |
| Coro1a  | 0.0102                           | -0.15           | 0.84          | -0.30           | <u>0.0010</u> | -0.10           | 0.056         | -0.45           | <u>0.0001</u> | Coronin-1A                                                    | O89053     |

Table S2: Differentially expressed proteins in cerebral cortex (*continued*)

| gene    | $\pi_{TW/EW} \times \pi_{TF/TW}$ | log2FC<br>TW/EW | padj<br>TW/EW | log2FC<br>TF/TW | padj<br>TF/TW | log2FC<br>EF/EW | padj<br>EF/EW | log2FC<br>TF/EW | padj<br>TF/EW | description                                                    | accession  |
|---------|----------------------------------|-----------------|---------------|-----------------|---------------|-----------------|---------------|-----------------|---------------|----------------------------------------------------------------|------------|
| Coro1b  | 0.8370                           | -0.31           | <u>0.0010</u> | -0.30           | <u>0.0010</u> | 0.28            | <u>0.0010</u> | -0.61           | <u>0.0001</u> | Coronin-1B                                                     | Q9WUM3     |
| Coro1c  | -0.0015                          | -0.16           | 0.42          | 0.07            | 0.44          | 0.34            | <u>0.0010</u> | -0.09           | 0.79          | Coronin-1C                                                     | Q9WUM4     |
| Coro2a  | 0.3454                           | -1.16           | 0.66          | -4.38           | 0.42          | 1.55            | 0.38          | -5.54           | 0.18          | Coronin                                                        | B1AVH5     |
| Coro2b  | -3.7832                          | 0.93            | 0.2           | -1.94           | <u>0.0010</u> | 0.13            | 0.62          | -1.01           | <u>0.0280</u> | Coronin-2B                                                     | Q8BH44     |
| Coro6   | 0.0015                           | -0.44           | <u>0.0260</u> | -0.02           | 0.78          | 0.24            | 0.11          | -0.46           | <u>0.0009</u> | Coronin-6                                                      | Q920M5     |
| Coro7   | 0.0003                           | -0.08           | 0.89          | -0.19           | 0.46          | -0.39           | 0.5           | -0.27           | 1             | Coronin-7                                                      | Q9D2V7     |
| Cotl1   | 0.0025                           | -0.01           | 0.84          | -0.98           | <u>0.0004</u> | -0.29           | 0.49          | -0.99           | 0.08          | Coactosin-like protein                                         | Q9CQI6     |
| Cox4i1  | -0.1988                          | 0.35            | 0.11          | -0.44           | <u>0.0450</u> | 0.27            | 0.73          | -0.09           | 0.46          | Cytochrome c oxidase subunit 4 isoform 1, mitochondrial        | P19783     |
| Cox5a   | -0.1194                          | 0.17            | 0.18          | -0.50           | <u>0.0130</u> | 0.36            | 0.51          | -0.33           | 0.13          | Cytochrome c oxidase subunit 5A, mitochondrial                 | P12787     |
| Cox5b   | -0.2283                          | 0.31            | 0.085         | -0.41           | <u>0.0210</u> | 0.32            | 0.1           | -0.10           | 0.69          | Cytochrome c oxidase subunit 5B, mitochondrial                 | P19536     |
| Cox6b1  | -0.1605                          | 0.36            | 0.29          | -0.62           | <u>0.0460</u> | 0.12            | 0.49          | -0.26           | 0.2           | Cytochrome c oxidase subunit 6B1                               | P56391     |
| Cox6c   | -0.0075                          | 0.19            | 0.64          | -0.38           | 0.29          | 0.42            | 0.62          | -0.19           | 0.35          | Cytochrome c oxidase subunit 6C                                | Q9CPQ1     |
| Cox7a2  | -0.0096                          | 0.30            | 0.41          | -0.26           | 0.48          | 0.55            | 0.1           | 0.04            | 0.87          | Cytochrome c oxidase subunit 7A2, mitochondrial                | P48771     |
| Cox7a2l | -0.0234                          | -0.54           | 0.85          | 0.85            | 0.19          | -1.00           | 0.58          | 0.31            | 0.4           | Cytochrome c oxidase subunit 7A-related protein, mitochondrial | Q61387     |
| Cox7c   | -0.2151                          | 0.58            | 0.073         | -0.41           | 0.16          | 0.22            | 0.61          | 0.17            | 0.49          | Cytochrome c oxidase subunit 7C, mitochondrial                 | P17665     |
| Cpe     | -0.6180                          | 1.47            | 0.094         | -0.68           | 0.25          | 0.32            | 0.69          | 0.79            | 0.62          | Carboxypeptidase E                                             | Q00493     |
| Cpeb3   | -0.2099                          | 0.98            | 0.38          | -1.03           | 0.32          | -0.89           | 0.41          | -0.05           | 0.85          | Cytoplasmic polyadenylation element-binding protein 3          | A0A0R4J102 |
| Cplx1   | -0.0095                          | -0.10           | 0.44          | 0.29            | 0.12          | -0.16           | 0.24          | 0.19            | 0.2           | Complexin-1                                                    | P63040     |
| Cpne1   | -0.0004                          | -0.50           | 0.059         | 0.04            | 0.96          | 0.18            | 0.39          | -0.46           | 0.17          | Copine-1                                                       | Q8C166     |
| Cpne6   | 0.0036                           | -0.84           | 0.49          | -0.27           | 0.89          | 0.01            | 0.38          | -1.10           | 0.41          | Copine-6                                                       | Q9Z140     |
| Cpsf7   | -0.0007                          | -0.16           | 0.84          | 0.31            | 0.66          | -0.19           | 0.8           | 0.15            | 0.76          | Cleavage and polyadenylation specificity factor subunit 7      | Q8BTV2     |
| Cracd   | -0.0199                          | 0.31            | 0.73          | -0.55           | 0.14          | -0.48           | 0.56          | -0.25           | 0.71          | RIKEN cDNA C530008M17 gene                                     | E9Q5L4     |
| Cracd1  | -0.1841                          | 0.52            | 0.11          | -0.28           | <u>0.0480</u> | 0.26            | 0.97          | 0.25            | 1             | Capping protein-inhibiting regulator of actin-like             | E9Q3M9     |
| Crat    | 0.0035                           | 0.28            | <u>0.0320</u> | 0.03            | 0.53          | 0.38            | 0.57          | 0.30            | 0.17          | Carnitine O-acetyltransferase                                  | P47934     |
| Creld1  | -0.0004                          | -0.05           | 0.85          | 0.27            | 0.35          | -0.10           | 0.34          | 0.22            | 0.41          | Protein disulfide isomerase Creld1                             | Q91XD7     |
| Crip2   | -0.9990                          | 1.16            | 0.32          | -1.89           | 0.12          | -0.19           | 0.96          | -0.73           | 0.45          | Cysteine-rich protein 2                                        | Q9DCT8     |
| Crk     | -0.0310                          | 1.17            | 0.53          | -0.99           | 0.8           | 1.85            | <u>0.0280</u> | 0.18            | 0.77          | Adapter molecule crk                                           | Q64010     |
| Crmp1   | -0.0048                          | -0.12           | 0.42          | 0.18            | 0.26          | 0.09            | 0.46          | 0.07            | 0.62          | Crmp1 protein                                                  | Q6P1J1     |
| Crocc   | -0.0053                          | 0.10            | 0.91          | -1.51           | 0.14          | 0.61            | 0.52          | -1.41           | 0.12          | Rootletin                                                      | Q8CJ40     |
| Crtac1  | 0.0000                           | 0.04            | 0.72          | -0.02           | 0.93          | 0.29            | 0.28          | 0.02            | 0.69          | Cartilage acidic protein 1                                     | A0A571BE99 |

Table S2: Differentially expressed proteins in cerebral cortex (*continued*)

| gene          | $\pi_{TW/EW} \times \pi_{TF/TW}$ | log2FC<br>TW/EW | padj<br>TW/EW | log2FC<br>TF/TW | padj<br>TF/TW | log2FC<br>EF/EW | padj<br>EF/EW | log2FC<br>TF/EW | padj<br>TF/EW | description                                | accession  |
|---------------|----------------------------------|-----------------|---------------|-----------------|---------------|-----------------|---------------|-----------------|---------------|--------------------------------------------|------------|
| Cryab         | 0.0000                           | 0.07            | 0.85          | -0.02           | 0.89          | 0.21            | 0.49          | 0.05            | 0.81          | Alpha-crystallin B chain                   | P23927     |
| Crym          | 0.0114                           | -0.55           | <u>0.0001</u> | -0.02           | 0.55          | -0.32           | <u>0.0060</u> | -0.57           | <u>0.0001</u> | Ketimine reductase mu-crystallin           | O54983     |
| Cryz          | 1.8467                           | 0.67            | 0.14          | 0.92            | <u>0.0003</u> | -0.50           | 0.68          | 1.59            | <u>0.0010</u> | Quinone oxidoreductase (Fragment)          | A0A0A6YXR4 |
| Cryzl1        | 0.0006                           | -0.04           | 0.57          | -0.13           | 0.34          | 0.22            | 0.43          | -0.18           | 0.82          | Quinone oxidoreductase-like protein 1      | Q921W4     |
| Cs            | 0.0962                           | -0.24           | 0.13          | -0.30           | <u>0.0310</u> | 0.14            | 0.87          | -0.54           | <u>0.0017</u> | Citrate synthase, mitochondrial            | Q9CZU6     |
| Csde1         | 0.0000                           | -0.15           | 0.64          | 0.01            | 1             | -0.02           | 0.81          | -0.14           | 0.37          | Cold shock domain-containing protein E1    | A0A0G2JF72 |
| Csnk1a1       | -0.3246                          | 0.56            | 0.51          | -1.78           | 0.077         | 0.02            | 0.68          | -1.22           | 0.11          | Casein kinase I isoform alpha              | E9Q2U6     |
| Csnk1e        | -0.0285                          | 0.22            | 0.86          | -1.74           | 0.073         | -0.70           | 0.33          | -1.52           | 0.11          | Casein kinase I isoform epsilon            | Q9JMK2     |
| Csnk1g3       | -20.2042                         | 4.00            | 0.29          | -8.65           | 0.082         | -2.99           | 0.82          | -4.65           | 0.077         | Casein kinase I isoform gamma-3            | Q8C4X2     |
| Cspg4         | -0.0951                          | 3.52            | 0.72          | -3.13           | 0.87          | 0.69            | 0.86          | 0.39            | 0.75          | Chondroitin sulfate proteoglycan 4         | Q8VHY0     |
| Cspg5         | -0.0122                          | -0.20           | 0.52          | 0.41            | 0.3           | -0.17           | 0.59          | 0.21            | 0.66          | Chondroitin sulfate proteoglycan 5         | Q71M36     |
| Cst3          | -0.0185                          | 0.26            | 0.27          | -0.26           | 0.33          | 0.23            | 0.27          | 0.00            | 0.74          | Cystatin-C                                 | P21460     |
| Cstf2         | -0.2516                          | 0.34            | 0.54          | -2.25           | 0.059         | -0.71           | 0.57          | -1.92           | 0.21          | Cleavage stimulation factor subunit 2      | Q8BIQ5     |
| Ctbp1         | -0.0016                          | -0.05           | 0.53          | 0.27            | 0.38          | -0.03           | 0.37          | 0.22            | 0.087         | C-terminal-binding protein 1               | O88712     |
| Ctnna2        | -0.2391                          | 0.44            | 0.17          | -0.65           | 0.082         | 0.34            | 0.5           | -0.20           | 0.95          | Alpha N-catenin                            | E0CXB9     |
| Ctnnb1        | -0.2644                          | 0.38            | 0.12          | -0.64           | 0.066         | 0.21            | 0.69          | -0.26           | 0.96          | Catenin beta-1                             | Q02248     |
| Ctnnd2        | -0.0004                          | 0.45            | 0.82          | -0.63           | 0.96          | 0.18            | 0.63          | -0.18           | 0.76          | Catenin delta-2                            | B7ZNF6     |
| Ctsd          | -0.0090                          | -0.33           | <u>0.0270</u> | 0.10            | 0.67          | -0.30           | 0.065         | -0.23           | 0.071         | Cathepsin D                                | F8WIR1     |
| Cttn          | 0.0009                           | -0.16           | 0.95          | -0.16           | <u>0.0260</u> | 0.22            | <u>0.0005</u> | -0.32           | <u>0.0430</u> | Src substrate cortactin                    | Q60598     |
| Cttnbp2       | -0.0004                          | 0.07            | 0.94          | -0.38           | 0.27          | 0.22            | 0.51          | -0.31           | 0.27          | Cortactin-binding protein 2                | B9EJA2     |
| Cul1          | -0.0186                          | 0.33            | 0.13          | -0.16           | 0.4           | -0.03           | 0.76          | 0.16            | 0.32          | Cullin-1 (Fragment)                        | Q3TPM3     |
| Cul3          | 0.0001                           | -0.02           | 0.99          | -1.46           | 0.16          | -0.96           | 0.26          | -1.49           | 0.14          | Cullin-3                                   | Q9JLV5     |
| Cul5          | -0.0001                          | 0.03            | 0.85          | -0.23           | 0.77          | 0.19            | 0.89          | -0.20           | 0.91          | Cullin-5                                   | E9PV12     |
| Cyb5a         | -0.2363                          | -1.38           | 0.34          | 1.25            | 0.51          | -1.22           | 0.52          | -0.13           | 0.78          | Cytochrome b5                              | G5E850     |
| Cyb5b         | -0.0004                          | 0.06            | 0.84          | -0.53           | 0.68          | 0.38            | 0.66          | -0.48           | 0.54          | Cytochrome b5 type B                       | Q9CQX2     |
| Cyb5r3        | -1.0101                          | 0.42            | 0.061         | -0.66           | <u>0.0010</u> | -0.02           | 0.74          | -0.25           | 0.62          | NADH-cytochrome b5 reductase               | F2Z456     |
| Cyc1          | -3.7422                          | 0.58            | <u>0.0020</u> | -0.65           | <u>0.0002</u> | 0.18            | 0.98          | -0.07           | 0.89          | Cytochrome c1, heme protein, mitochondrial | Q9D0M3     |
| Cycs          | -0.0003                          | 0.05            | 0.94          | -0.55           | 0.43          | 0.51            | 0.36          | -0.50           | 0.46          | Cytochrome c, somatic                      | P62897     |
| Cyfp2         | 0.0002                           | 0.13            | 0.38          | 0.15            | 0.94          | 0.01            | 0.78          | 0.27            | 0.43          | Cytoplasmic FMR1-interacting protein 2     | Q5SQX6     |
| Cyld          | -0.7121                          | 0.58            | 0.25          | -1.30           | <u>0.0270</u> | 0.47            | 0.52          | -0.72           | 0.14          | Ubiquitin carboxyl-terminal hydrolase CYLD | Q80TQ2     |
| Cyp46a1       | 0.0000                           | 0.40            | <u>0.0010</u> | 0.00            | 0.9           | 0.19            | 0.97          | 0.40            | <u>0.0160</u> | Cholesterol 24-hydroxylase                 | Q9WVK8     |
| Cyrib         | 0.0000                           | -0.06           | 0.92          | 0.01            | 0.98          | -0.41           | 0.76          | -0.05           | 0.97          | CYFIP-related Rac1 interactor B            | Q921M7     |
| Cyth2         | -0.0270                          | 0.69            | 0.4           | -0.61           | 0.69          | 0.31            | 0.66          | 0.08            | 0.51          | Cytohesin-2                                | A0A1B0GRX7 |
| D430041D05Rik | -0.0210                          | 0.27            | 0.52          | -0.60           | 0.35          | 0.15            | 0.62          | -0.33           | 0.93          | RIKEN cDNA D430041D05 gene                 | A0A2R8VKG2 |
| D630045J12Rik | -0.1228                          | 0.16            | 0.5           | -0.85           | <u>0.0010</u> | 0.05            | 0.87          | -0.69           | <u>0.0001</u> | RIKEN cDNA D630045J12 gene                 | D3YTS3     |

Table S2: Differentially expressed proteins in cerebral cortex (*continued*)

| gene    | $\pi_{TW/EW} \times \pi_{TF/TW}$ | log2FC<br>TW/EW | padj<br>TW/EW | log2FC<br>TF/TW | padj<br>TF/TW | log2FC<br>EF/EW | padj<br>EF/EW | log2FC<br>TF/EW | padj<br>TF/EW | description                                                                                                | accession  |
|---------|----------------------------------|-----------------|---------------|-----------------|---------------|-----------------|---------------|-----------------|---------------|------------------------------------------------------------------------------------------------------------|------------|
| Daam1   | -0.5297                          | 0.49            | <u>0.0001</u> | -0.25           | 0.083         | -0.14           | 0.38          | 0.24            | 0.11          | Disheveled-associated activator of morphogenesis 1                                                         | Q8BPM0     |
| Daam2   | -0.8254                          | 1.10            | <u>0.0280</u> | -0.67           | 0.19          | 0.13            | 0.53          | 0.43            | 0.24          | Disheveled-associated activator of morphogenesis 2                                                         | Q80U19     |
| Dagla   | -0.0002                          | 0.03            | 0.74          | -0.10           | 0.31          | 0.28            | 0.86          | -0.07           | 0.5           | Diacylglycerol lipase-alpha                                                                                | Q6WQJ1     |
| Dap3    | -1.0736                          | 0.88            | 0.1           | -1.22           | 0.1           | 0.53            | 0.22          | -0.34           | 0.67          | 28S ribosomal protein S29, mitochondrial                                                                   | G3X9M0     |
| Dapk1   | -0.0160                          | 0.16            | 0.81          | -1.09           | 0.1           | 0.71            | 0.19          | -0.93           | 0.1           | Death-associated protein kinase 1                                                                          | Q80YE7     |
| Dars1   | 0.0000                           | -0.08           | 0.63          | 0.07            | 0.91          | 0.04            | 0.6           | -0.01           | 0.58          | Aspartate-tRNA ligase, cytoplasmic                                                                         | Q922B2     |
| Dars2   | -1.0995                          | 7.83            | 0.052         | -2.67           | 0.91          | 8.64            | <u>0.0280</u> | 5.16            | 0.12          | Aspartate-tRNA ligase, mitochondrial                                                                       | Q8BIP0     |
| Dbn1    | -4.6948                          | 0.72            | <u>0.0130</u> | -1.03           | <u>0.0004</u> | 1.42            | <u>0.0020</u> | -0.31           | 0.24          | Drebrin                                                                                                    | A0A0R4J1E3 |
| Dbnl    | 0.2740                           | -0.27           | 0.23          | -0.53           | <u>0.0010</u> | 0.04            | 0.95          | -0.80           | <u>0.0002</u> | Drebrin-like protein                                                                                       | Q62418     |
| Dbt     | -0.4508                          | 0.68            | 0.14          | -0.81           | 0.11          | -0.11           | 0.55          | -0.13           | 0.9           | Lipoamide acyltransferase component of branched-chain alpha-keto acid dehydrogenase complex, mitochondrial | P53395     |
| Dclk1   | -1.7059                          | 0.80            | <u>0.0170</u> | -0.65           | <u>0.0140</u> | -0.19           | 0.55          | 0.15            | 0.58          | Serine/threonine-protein kinase DCLK1                                                                      | A0A0G2JGQ6 |
| Dclk2   | -140.6945                        | 7.85            | <u>0.0260</u> | -7.70           | <u>0.0340</u> | 1.54            | 0.45          | 0.15            | 0.8           | Serine/threonine-protein kinase DCLK2                                                                      | A0A0A6YX71 |
| Dctn1   | -0.2190                          | 0.39            | 0.26          | -0.49           | <u>0.0110</u> | 0.05            | 0.54          | -0.10           | 0.17          | Dynactin subunit 1                                                                                         | E9Q3M3     |
| Dctn2   | -0.0033                          | -0.06           | 0.1           | 0.23            | 0.58          | 0.27            | 0.069         | 0.17            | <u>0.0210</u> | Dynactin subunit 2                                                                                         | Q99KJ8     |
| Dctn3   | -1.6800                          | -0.28           | <u>0.0010</u> | 0.50            | <u>0.0001</u> | 0.36            | 0.91          | 0.22            | <u>0.0450</u> | Dynactin subunit 3                                                                                         | Q9Z0Y1     |
| Dctn4   | -0.9070                          | 0.92            | 0.15          | -1.08           | 0.078         | 0.18            | 0.55          | -0.16           | 0.65          | Dynactin subunit 4                                                                                         | Q8C8Y8     |
| Dcun1d1 | -2.0393                          | 1.02            | 0.73          | -9.42           | <u>0.0280</u> | -3.27           | 0.55          | -8.41           | 0.077         | DCN1-like protein 1                                                                                        | Q9QZ73     |
| Ddah1   | 0.0081                           | -0.32           | 0.51          | -0.28           | 0.49          | -0.44           | 0.15          | -0.60           | <u>0.0380</u> | N(G),N(G)-dimethylarginine dimethylaminohydrolase 1                                                        | Q9CWS0     |
| Ddb1    | 0.0000                           | -0.28           | 1             | 0.34            | 0.51          | 0.16            | 0.97          | 0.06            | 0.58          | DNA damage-binding protein 1                                                                               | Q3U1J4     |
| Ddc     | 0.0002                           | -0.12           | 0.82          | -0.09           | 0.69          | -0.03           | 0.95          | -0.21           | 0.45          | Aromatic-L-amino-acid decarboxylase                                                                        | O88533     |
| Ddost   | 0.6083                           | 0.21            | 0.083         | 0.67            | <u>0.0001</u> | 0.28            | 0.25          | 0.88            | <u>0.0001</u> | Dolichyl-diphosphooligosaccharide-protein glycosyltransferase 48 kDa subunit                               | O54734     |
| Ddx1    | -0.3829                          | 0.58            | <u>0.0026</u> | -0.31           | 0.15          | 0.17            | 0.25          | 0.28            | <u>0.0300</u> | ATP-dependent RNA helicase DDX1                                                                            | Q91VR5     |
| Ddx17   | -0.0147                          | 0.32            | 0.29          | -0.22           | 0.41          | -0.43           | 0.096         | 0.10            | 0.73          | RNA helicase                                                                                               | Q3U741     |
| Ddx19b  | -0.0002                          | 0.04            | 0.92          | -0.29           | 0.34          | -0.01           | 1             | -0.25           | 0.33          | RNA helicase                                                                                               | Q8BZY3     |
| Ddx39b  | -0.0021                          | -0.21           | 0.74          | 0.32            | 0.58          | -0.24           | 0.72          | 0.11            | 0.98          | Spliceosome RNA helicase Ddx39b                                                                            | Q9Z1N5     |
| Ddx46   | 0.0019                           | 0.13            | 0.46          | 0.13            | 0.46          | 0.11            | 0.59          | 0.27            | 0.76          | RNA helicase                                                                                               | F8WHR6     |
| Ddx5    | -0.0070                          | 0.70            | 0.88          | -0.93           | 0.64          | -0.43           | 0.53          | -0.23           | 0.64          | Probable ATP-dependent RNA helicase DDX5                                                                   | Q61656     |
| Ddx6    | 0.0002                           | 0.51            | 0.18          | 0.02            | 0.93          | 0.32            | 0.62          | 0.54            | 0.23          | Probable ATP-dependent RNA helicase DDX6                                                                   | P54823     |
| Decr1   | 0.5659                           | 0.36            | <u>0.0120</u> | 0.40            | <u>0.0090</u> | 0.18            | 0.44          | 0.76            | <u>0.0001</u> | 2,4-dienoyl-CoA reductase [(3E)-enoyl-CoA-producing], mitochondrial                                        | Q9CQ62     |

Table S2: Differentially expressed proteins in cerebral cortex (*continued*)

| gene    | $\pi_{TW/EW} \times \pi_{TF/TW}$ | log2FC<br>TW/EW | padj<br>TW/EW | log2FC<br>TF/TW | padj<br>TF/TW | log2FC<br>EF/EW | padj<br>EF/EW | log2FC<br>TF/EW | padj<br>TF/EW | description                                                                                              | accession  |
|---------|----------------------------------|-----------------|---------------|-----------------|---------------|-----------------|---------------|-----------------|---------------|----------------------------------------------------------------------------------------------------------|------------|
| Dennd1a | -0.0101                          | -0.11           | 0.57          | 0.28            | <u>0.0450</u> | -0.06           | 0.75          | 0.16            | 0.25          | DENN domain-containing protein 1A                                                                        | Q8K382     |
| Denr    | 0.0008                           | -0.05           | 0.46          | -0.11           | 0.36          | 0.14            | 0.31          | -0.16           | 0.98          | Density-regulated protein (Fragment)                                                                     | E9Q0G1     |
| Derpc   | -0.1117                          | -0.37           | <u>0.0160</u> | 0.16            | 0.089         | 0.13            | 0.21          | -0.22           | 0.19          | Decreased expression in renal and prostate cancer protein                                                | P0CG14     |
| Dgkb    | -2.0151                          | 1.38            | <u>0.0240</u> | -0.87           | 0.092         | 0.48            | 0.36          | 0.51            | 0.49          | Diacylglycerol kinase beta                                                                               | Q6NS52     |
| Dgkd    | -0.0011                          | 0.15            | 0.69          | -0.23           | 0.63          | -0.80           | 0.57          | -0.08           | 0.76          | Diacylglycerol kinase delta                                                                              | E9PUQ8     |
| Dgke    | 0.0015                           | -0.09           | 0.97          | -4.14           | 0.49          | -4.51           | 0.19          | -4.23           | 0.45          | Diacylglycerol kinase (ATP)                                                                              | F2Z490     |
| Dgki    | 0.0030                           | -0.06           | 0.82          | -0.61           | 0.11          | -0.09           | 0.87          | -0.67           | 0.095         | Diacylglycerol kinase iota                                                                               | D3YWQ0     |
| Dgkz    | -0.0623                          | 0.63            | 0.28          | -0.53           | 0.46          | 0.35            | 0.48          | 0.10            | 0.37          | Diacylglycerol kinase                                                                                    | A2AHJ7     |
| Dhrs1   | 0.0000                           | -0.01           | 0.99          | 0.06            | 0.76          | -0.06           | 0.52          | 0.04            | 0.75          | Dehydrogenase/reductase SDR family member 1                                                              | Q99L04     |
| Dhrs4   | -0.0031                          | -0.07           | 0.62          | 0.24            | 0.13          | 0.28            | <u>0.0220</u> | 0.17            | <u>0.0360</u> | Dehydrogenase/reductase SDR family member 4                                                              | Q99LB2     |
| Dhrs7b  | -0.1038                          | 0.47            | 0.2           | -0.51           | 0.24          | -0.05           | 0.85          | -0.04           | 0.91          | Dehydrogenase/reductase SDR family member 7B                                                             | Z4YKT6     |
| Dhx15   | -0.7105                          | 0.88            | 0.26          | -1.38           | 0.1           | 0.32            | 0.7           | -0.50           | 0.49          | Pre-mRNA-splicing factor ATP-dependent RNA helicase DHX15                                                | O35286     |
| Dhx30   | -4.9320                          | 1.91            | 0.22          | -2.72           | <u>0.0360</u> | -0.81           | 0.41          | -0.81           | 0.34          | RNA helicase                                                                                             | A0A0G2JGL8 |
| Dhx36   | 0.0045                           | 0.41            | 0.76          | 0.95            | 0.8           | -2.11           | 0.88          | 1.37            | 0.44          | ATP-dependent DNA/RNA helicase DHX36                                                                     | Q8VHK9     |
| Dhx9    | -0.0033                          | 0.16            | 0.59          | -0.43           | 0.62          | -0.55           | 0.28          | -0.27           | 0.94          | DEAH box protein 9                                                                                       | A0A087WPL5 |
| Dip2a   | -0.0154                          | 0.38            | 0.6           | -0.59           | 0.49          | -1.00           | 0.64          | -0.21           | 0.83          | Disco-interacting protein 2 homolog A                                                                    | D3Z7D3     |
| Dip2b   | -0.9227                          | 0.63            | <u>0.0010</u> | -0.39           | 0.056         | 0.13            | 0.56          | 0.24            | 0.27          | Disco-interacting protein 2 homolog B                                                                    | Q3UH60     |
| Diras2  | -0.2782                          | 0.61            | <u>0.0290</u> | -0.36           | 0.15          | 0.27            | 0.54          | 0.24            | 0.48          | GTP-binding protein Di-Ras2                                                                              | Q5PR73     |
| Dis3l2  | -0.5469                          | 0.52            | 0.12          | -0.75           | <u>0.0300</u> | 0.43            | 0.12          | -0.22           | 0.31          | DIS3-like exonuclease 2                                                                                  | Q8CI75     |
| Dlat    | 0.0000                           | 0.00            | 0.77          | -0.17           | 0.057         | -0.37           | 0.072         | -0.17           | 0.11          | Dihydrolipoyllysine-residue acetyltransferase component of pyruvate dehydrogenase complex, mitochondrial | Q8BMF4     |
| Dld     | -0.0094                          | -0.19           | <u>0.0210</u> | 0.07            | 0.38          | -0.08           | 0.097         | -0.12           | 0.079         | Dihydrolipoyl dehydrogenase, mitochondrial                                                               | O08749     |
| Dlg1    | -0.0005                          | 0.07            | 0.69          | -0.14           | 0.5           | 0.03            | 0.87          | -0.07           | 0.57          | Disks large homolog 1                                                                                    | E9Q9H0     |
| Dlg2    | -15.2308                         | 1.24            | <u>0.0180</u> | -1.76           | <u>0.0001</u> | -0.35           | 0.33          | -0.52           | <u>0.0310</u> | Disks large homolog 2                                                                                    | A0A571BEK3 |
| Dlg3    | -0.0191                          | 0.53            | 0.61          | -0.59           | 0.52          | -0.31           | 0.17          | -0.06           | 0.87          | Disks large homolog 3                                                                                    | A2BEE9     |
| Dlg4    | -18.8026                         | 1.55            | 0.071         | -2.64           | <u>0.0001</u> | -0.55           | 0.066         | -1.09           | <u>0.0001</u> | Disks large homolog 4                                                                                    | A0A338P6E5 |
| Dlgap1  | -1.2602                          | 3.36            | 0.67          | -4.86           | <u>0.36</u>   | -1.73           | 0.32          | -1.49           | <u>0.54</u>   | Disks large-associated protein 1                                                                         | Q9D415     |
| Dlgap2  | -1.0300                          | 0.73            | 0.35          | -1.58           | <u>0.0110</u> | -0.41           | 0.37          | -0.85           | 0.072         | Disks large-associated protein 2                                                                         | Q0VF59     |
| Dlgap3  | -30.3718                         | 2.28            | 0.076         | -3.48           | <u>0.0004</u> | -0.20           | 0.35          | -1.20           | <u>0.0110</u> | Disks large-associated protein 3                                                                         | B1AS06     |
| Dlgap4  | -74.2828                         | 9.38            | 0.2           | -10.38          | 0.081         | 3.91            | 0.94          | -1.01           | 0.51          | Disks large-associated protein 4                                                                         | B1AZP2     |

Table S2: Differentially expressed proteins in cerebral cortex (*continued*)

| gene     | $\pi_{TW/EW} \times \pi_{TF/TW}$ | log2FC<br>TW/EW | padj<br>TW/EW | log2FC<br>TF/TW | padj<br>TF/TW | log2FC<br>EF/EW | padj<br>EF/EW | log2FC<br>TF/EW | padj<br>TF/EW | description                                                                                                      | accession  |
|----------|----------------------------------|-----------------|---------------|-----------------|---------------|-----------------|---------------|-----------------|---------------|------------------------------------------------------------------------------------------------------------------|------------|
| Dlst     | -2.0555                          | -0.34           | <u>0.0020</u> | 0.56            | <u>0.0001</u> | 0.11            | 0.86          | 0.22            | <u>0.0180</u> | Dihydrolipoyllysine-residue succinyltransferase component of 2-oxoglutarate dehydrogenase complex, mitochondrial | Q9D2G2     |
| Dmac2l   | -0.1469                          | 0.26            | 0.39          | -0.89           | <u>0.0280</u> | -0.15           | 0.72          | -0.63           | 0.16          | ATP synthase subunit s, mitochondrial                                                                            | Q9CRA7     |
| Dmtn     | -0.5252                          | 0.29            | 0.2           | -0.96           | <u>0.0020</u> | 0.71            | <u>0.0440</u> | -0.67           | <u>0.0410</u> | Dematin                                                                                                          | Q9WV69     |
| Dmwd     | -0.0001                          | 0.06            | 0.71          | -0.09           | 0.67          | -0.03           | 0.7           | -0.03           | 0.89          | Dystrophia myotonica WD repeat-containing protein                                                                | E9Q6J8     |
| Dmx1l    | 0.0000                           | 0.00            | 0.49          | 0.29            | 0.48          | -0.39           | 0.14          | 0.29            | 0.054         | DmX-like protein 1                                                                                               | F8WGX5     |
| Dmx12    | -0.0749                          | -0.27           | 0.63          | 0.77            | <u>0.0160</u> | 0.06            | 0.97          | 0.49            | <u>0.0250</u> | DmX-like protein 2                                                                                               | B0V2P5     |
| Dnah8    | -0.0262                          | 0.85            | 0.85          | -1.63           | 0.54          | -1.22           | 0.28          | -0.79           | 0.74          | Dynein heavy chain 8, axonemal                                                                                   | Q91XQ0     |
| Dnaja1   | -0.0036                          | 0.55            | 0.53          | -0.22           | 0.78          | -1.03           | 0.32          | 0.33            | 0.64          | DnaJ homolog subfamily A member 1                                                                                | P63037     |
| Dnaja2   | 0.0000                           | 0.12            | 1             | -0.06           | 0.97          | -0.39           | 0.11          | 0.06            | 0.49          | DnaJ homolog subfamily A member 2                                                                                | Q9QYJ0     |
| Dnaja3   | -4.8340                          | 1.04            | <u>0.0190</u> | -1.32           | <u>0.0090</u> | -0.05           | 0.81          | -0.29           | 0.93          | DnaJ homolog subfamily A member 3, mitochondrial                                                                 | Q99M87     |
| Dnaja4   | -0.0247                          | 0.29            | <u>0.0400</u> | -0.13           | 0.34          | 0.08            | 0.57          | 0.16            | 0.16          | DnaJ homolog subfamily A member 4                                                                                | Q9JMC3     |
| Dnajib1  | -0.1740                          | -0.44           | 0.63          | 1.33            | <u>0.0330</u> | -0.06           | 0.91          | 0.89            | 0.11          | DnaJ homolog subfamily B member 1                                                                                | Q3TYL7     |
| Dnajib11 | -0.0216                          | -0.10           | 0.43          | 0.46            | 0.052         | 0.23            | 0.88          | 0.36            | 0.075         | DnaJ homolog subfamily B member 11                                                                               | Q99KV1     |
| Dnajib14 | -0.2976                          | 0.61            | 0.19          | -0.85           | 0.16          | -0.58           | 0.18          | -0.24           | 0.65          | DnaJ homolog subfamily B member 14                                                                               | Q149L6     |
| Dnajib2  | 0.0022                           | -0.41           | 0.37          | -0.12           | 0.79          | -0.05           | 0.97          | -0.53           | 0.052         | DnaJ homolog subfamily B member 2                                                                                | Q9QYI5     |
| Dnajib4  | -1.1734                          | 2.53            | 0.065         | -1.82           | 0.61          | 2.03            | 0.081         | 0.71            | 0.38          | DnaJ homolog subfamily B member 4                                                                                | Q9D832     |
| Dnajib5  | -0.1063                          | 0.33            | 0.67          | -1.82           | 0.096         | -0.18           | 0.93          | -1.49           | 0.094         | DnaJ homolog subfamily B member 5                                                                                | A2AG30     |
| Dnajc10  | -0.0099                          | 0.61            | 0.64          | -0.67           | 0.75          | 0.89            | 0.089         | -0.06           | 0.68          | DnaJ homolog subfamily C member 10                                                                               | Q9DC23     |
| Dnajc11  | 0.0811                           | 0.29            | 0.2           | 0.40            | 0.1           | 0.17            | 1             | 0.70            | <u>0.0080</u> | DnaJ homolog subfamily C member 11                                                                               | Q5U458     |
| Dnajc13  | -0.4381                          | 0.35            | <u>0.0440</u> | -0.55           | <u>0.0210</u> | 0.14            | 0.83          | -0.20           | 0.38          | DnaJ heat shock protein family (Hsp40) member C13                                                                | D4AFX7     |
| Dnajc19  | 0.0004                           | 0.24            | 0.055         | 0.03            | 0.9           | 0.20            | 0.51          | 0.27            | 0.47          | Mitochondrial import inner membrane translocase subunit TIM14                                                    | D3Z5K6     |
| Dnajc3   | 0.0000                           | 0.00            | 0.48          | 0.51            | <u>0.0001</u> | 0.06            | 0.32          | 0.50            | <u>0.0001</u> | DnaJ homolog subfamily C member 3                                                                                | Q91YW3     |
| Dnajc6   | -0.1403                          | -0.12           | 0.44          | 0.82            | <u>0.0001</u> | 0.13            | 0.55          | 0.70            | <u>0.0060</u> | Putative tyrosine-protein phosphatase auxilin                                                                    | Q80TZ3     |
| Dnajc8   | -152.7034                        | 9.65            | <u>0.0280</u> | -8.09           | 0.055         | 0.23            | 0.66          | 1.57            | 0.22          | DnaJ homolog subfamily C member 8                                                                                | A2ALF3     |
| Dner     | 0.0007                           | 0.04            | 0.87          | 0.48            | 0.26          | 0.11            | 0.6           | 0.52            | 0.16          | Delta and Notch-like epidermal growth factor-related receptor                                                    | Q8JZM4     |
| Dnm1     | 0.0917                           | 0.28            | 0.14          | 0.40            | 0.11          | -0.13           | 0.87          | 0.68            | <u>0.0036</u> | Dynamin GTPase                                                                                                   | A0A0J9YUN4 |
| Dnm1l    | 0.0281                           | 0.37            | 0.19          | 0.18            | 0.26          | 0.20            | 0.47          | 0.55            | 0.088         | Dynamin-1-like protein                                                                                           | Q8K1M6     |
| Dnm3     | 0.0000                           | 0.48            | <u>0.0002</u> | 0.13            | 1             | -0.06           | 0.81          | 0.61            | <u>0.0001</u> | Dynamin-3                                                                                                        | Q8BZ98     |
| Dock1    | 0.0055                           | -0.30           | 0.69          | -0.21           | 0.29          | 0.01            | 0.76          | -0.51           | 0.22          | Dedicator of cytokinesis protein 1                                                                               | Q8BUR4     |
| Dock3    | -0.4464                          | 0.46            | 0.066         | -0.49           | <u>0.0210</u> | -0.10           | 0.8           | -0.03           | 0.82          | Dedicator of cytokinesis protein 3                                                                               | Q8CIQ7     |

Table S2: Differentially expressed proteins in cerebral cortex (*continued*)

| gene     | $\pi_{TW/EW} \times \pi_{TF/TW}$ | log2FC<br>TW/EW | padj<br>TW/EW | log2FC<br>TF/TW | padj<br>TF/TW | log2FC<br>EF/EW | padj<br>EF/EW | log2FC<br>TF/EW | padj<br>TF/EW | description                                                | accession  |
|----------|----------------------------------|-----------------|---------------|-----------------|---------------|-----------------|---------------|-----------------|---------------|------------------------------------------------------------|------------|
| Dock5    | -0.0226                          | 0.40            | 0.92          | -2.16           | 0.19          | -0.09           | 0.88          | -1.76           | 0.12          | Dedicator of cytokinesis protein 5                         | B2RY04     |
| Dock9    | 0.0014                           | 0.04            | 0.83          | 0.51            | 0.15          | -0.16           | 0.81          | 0.55            | 0.15          | Dedicator of cytokinesis protein 9                         | E9QMR2     |
| Dpp10    | -0.0393                          | -0.20           | 0.29          | 0.24            | <u>0.0300</u> | 0.09            | 0.81          | 0.04            | 0.5           | Inactive dipeptidyl peptidase 10                           | A0A5F8MPK1 |
| Dpp6     | -0.0891                          | -0.53           | 0.23          | 0.45            | 0.26          | -0.05           | 0.74          | -0.08           | 0.77          | Dipeptidyl aminopeptidase-like protein 6                   | Q5U4C2     |
| Dpysl2   | -0.0002                          | -0.03           | 0.54          | 0.08            | 0.49          | 0.08            | 0.69          | 0.04            | 0.98          | Dihydropyrimidinase-related protein 2                      | O08553     |
| Dpysl3   | -0.0049                          | 0.15            | <u>0.0280</u> | -0.02           | 0.088         | 0.02            | 1             | 0.13            | 0.43          | Dihydropyrimidinase-related protein 3                      | E9PWE8     |
| Dpysl4   | -0.0057                          | -0.06           | 0.31          | 0.33            | 0.27          | -0.09           | 0.44          | 0.28            | <u>0.0053</u> | Dihydropyrimidinase-related protein 4                      | O35098     |
| Dpysl5   | 0.0016                           | 0.26            | 0.2           | 0.02            | 0.36          | 0.07            | 0.77          | 0.28            | 0.52          | Dihydropyrimidinase-related protein 5                      | Q9EQF6     |
| Dsp      | -0.0021                          | -1.39           | <u>0.0230</u> | 0.21            | 0.99          | -0.63           | 0.25          | -1.18           | <u>0.0200</u> | Desmoplakin                                                | E9Q557     |
| Dtna     | -1.9005                          | 0.86            | <u>0.0260</u> | -0.81           | <u>0.0190</u> | 0.10            | 0.93          | 0.05            | 1             | Dystrobrevin                                               | A0A1Y7VL34 |
| Dtymk    | 0.0760                           | -0.20           | 0.8           | -3.15           | 0.057         | -0.53           | 0.68          | -3.35           | <u>0.0220</u> | Thymidylate kinase                                         | P97930     |
| Dync1h1  | -0.0010                          | -0.01           | <u>0.0030</u> | 0.12            | 0.47          | 0.06            | 0.43          | 0.11            | 0.076         | Cytoplasmic dynein 1 heavy chain 1                         | Q9JHU4     |
| Dync1i1  | 0.0039                           | 0.22            | 0.17          | 0.33            | 0.85          | 0.34            | 0.19          | 0.55            | <u>0.0310</u> | Cytoplasmic dynein 1 intermediate chain 1                  | D3Z0M6     |
| Dync1i2  | -0.0125                          | -0.13           | 0.43          | 0.34            | 0.17          | 0.23            | 0.2           | 0.22            | 0.41          | Cytoplasmic dynein 1 intermediate chain 2                  | A2BFF8     |
| Dync1li1 | -0.0017                          | -0.09           | 0.71          | 0.23            | 0.28          | 0.03            | 0.76          | 0.14            | 0.14          | Cytoplasmic dynein 1 light intermediate chain 1            | Q8R1Q8     |
| Dync1li2 | 0.0000                           | -0.05           | 0.82          | 0.17            | 0.92          | 0.20            | 0.57          | 0.11            | 0.71          | Cytoplasmic dynein 1 light intermediate chain 2            | Q6PDL0     |
| Dynlrb1  | 0.0007                           | -0.28           | 0.3           | -0.02           | 0.57          | -0.12           | 0.9           | -0.31           | 0.17          | Dynein light chain roadblock                               | A2AVR9     |
| Dyrk1a   | -0.0989                          | 0.59            | 0.17          | -0.44           | 0.32          | 0.13            | 0.48          | 0.15            | 0.5           | Dual-specificity kinase                                    | F6U6X3     |
| Dzank1   | -0.4138                          | 0.97            | 0.4           | -1.21           | 0.13          | 0.02            | 0.9           | -0.25           | 0.58          | Double zinc ribbon and ankyrin repeat-containing protein 1 | E9Q4Z6     |
| Ech1     | 0.0010                           | -0.09           | 0.55          | -0.12           | 0.43          | -0.28           | 0.079         | -0.21           | 0.15          | Delta(3,5)-Delta(2,4)-dienoyl-CoA isomerase, mitochondrial | O35459     |
| Echs1    | 0.0000                           | 0.06            | 0.44          | 0.16            | 0.97          | -1.04           | <u>0.0001</u> | 0.22            | 1             | Enoyl-CoA hydratase, mitochondrial                         | Q8BH95     |
| Eci1     | -0.1525                          | -0.55           | 0.081         | 0.33            | 0.17          | 0.26            | 0.26          | -0.22           | 0.32          | Enoyl-CoA delta isomerase 1, mitochondrial                 | P42125     |
| Eci2     | -0.0349                          | 0.69            | 0.28          | -0.19           | 0.33          | -1.12           | 0.5           | 0.50            | 0.38          | Enoyl-CoA delta isomerase 2                                | Q3TCD4     |
| Ecpas    | -0.1627                          | 0.78            | 0.25          | -0.70           | 0.32          | -0.71           | 0.62          | 0.08            | 0.92          | Proteasome adapter and scaffold protein ECM29              | Q6PDI5     |
| Edc4     | -0.0031                          | 0.83            | 0.2           | -0.24           | 0.95          | 0.79            | 0.16          | 0.58            | 0.15          | Enhancer of mRNA-decapping protein 4                       | A0A0R4J1Q0 |
| Edf1     | 0.0662                           | 0.21            | 0.16          | 0.26            | <u>0.0300</u> | 0.40            | <u>0.0470</u> | 0.47            | <u>0.0044</u> | Endothelial differentiation-related factor 1               | Q9JMG1     |
| Eea1     | -0.0062                          | -0.25           | 0.64          | 0.45            | 0.52          | 0.29            | 0.54          | 0.20            | 0.6           | Early endosome antigen 1                                   | Q8BL66     |
| Eef1a2   | 0.0012                           | 0.18            | 0.48          | 0.07            | 0.5           | 0.15            | 0.096         | 0.24            | 0.96          | Elongation factor 1-alpha 2                                | P62631     |
| Eef1b    | -0.0304                          | -0.08           | 0.29          | 0.28            | <u>0.0030</u> | 0.04            | 0.87          | 0.20            | <u>0.0070</u> | Elongation factor 1-beta                                   | O70251     |
| Eef1d    | -1.4808                          | 1.67            | 0.087         | -1.31           | 0.23          | -7.10           | 0.17          | 0.36            | 0.5           | Elongation factor 1-delta                                  | A0A0R4J1E2 |
| Eef1g    | 0.0029                           | 0.05            | 0.4           | 0.26            | 0.28          | 0.07            | 0.85          | 0.31            | 0.11          | Elongation factor 1-gamma                                  | Q9D8N0     |
| Eef2     | 0.0019                           | -0.12           | 0.63          | -0.10           | 0.17          | -0.18           | <u>0.0100</u> | -0.21           | <u>0.0018</u> | Elongation factor 2                                        | P58252     |

Table S2: Differentially expressed proteins in cerebral cortex (*continued*)

| gene    | $\pi_{TW/EW} \times \pi_{TF/TW}$ | log2FC<br>TW/EW | padj<br>TW/EW | log2FC<br>TF/TW | padj<br>TF/TW | log2FC<br>EF/EW | padj<br>EF/EW | log2FC<br>TF/EW | padj<br>TF/EW | description                                                    | accession  |
|---------|----------------------------------|-----------------|---------------|-----------------|---------------|-----------------|---------------|-----------------|---------------|----------------------------------------------------------------|------------|
| Efh2d   | 0.0103                           | -0.06           | 0.39          | -0.27           | <u>0.0280</u> | 0.51            | 0.17          | -0.33           | 0.4           | EF-hand domain-containing protein D2                           | Q8C845     |
| Ef1     | -0.0020                          | -0.74           | 0.25          | 0.11            | 0.91          | -0.37           | 0.76          | -0.63           | 0.37          | Elongation factor-like GTPase 1                                | Q8C0D5     |
| Efr3a   | -0.5220                          | 0.71            | 0.11          | -0.80           | 0.11          | 0.32            | 0.44          | -0.10           | 0.8           | Protein EFR3 homolog A                                         | A0A1D5RLL3 |
| Efr3b   | -0.3320                          | -0.50           | <u>0.0280</u> | 0.35            | 0.06          | 0.13            | 0.47          | -0.15           | 0.49          | Protein EFR3 homolog B                                         | Q6ZQ18     |
| Ehbp1   | -0.4057                          | 1.26            | 0.17          | -0.49           | 0.14          | 0.72            | 0.76          | 0.77            | 0.75          | EH domain-binding protein 1                                    | Q69ZW3     |
| Ehd1    | -0.0071                          | -0.17           | 0.34          | 0.20            | 0.36          | -0.15           | 0.3           | 0.03            | 0.91          | EH domain-containing protein 1                                 | Q9WVK4     |
| Ehd2    | -0.2395                          | 0.98            | 0.12          | -0.48           | 0.28          | -0.16           | 0.62          | 0.50            | 0.26          | EH domain-containing protein 2                                 | Q8BH64     |
| Ehd3    | -0.0283                          | 0.70            | 0.31          | -0.37           | 0.61          | 0.63            | 0.26          | 0.33            | 0.49          | EH domain-containing protein 3                                 | Q9QXY6     |
| Ehd4    | 0.1558                           | 0.60            | 0.11          | 0.45            | 0.25          | -0.16           | 0.93          | 1.04            | <u>0.0120</u> | EH domain-containing protein 4                                 | Q9EQP2     |
| Eif2a   | 0.0168                           | 0.38            | 0.48          | 0.33            | 0.38          | 0.55            | 0.19          | 0.71            | 0.11          | Eukaryotic translation initiation factor 2A                    | Q8BJW6     |
| Eif2s1  | -0.1147                          | 0.27            | <u>0.0300</u> | -0.21           | <u>0.0470</u> | 0.05            | 0.55          | 0.06            | 0.77          | Eukaryotic translation initiation factor 2 subunit 1           | Q6ZWX6     |
| Eif2s2  | -0.0661                          | 0.41            | 0.18          | -0.30           | 0.19          | -0.12           | 0.57          | 0.11            | 0.71          | Eukaryotic translation initiation factor 2 subunit 2           | Q99L45     |
| Eif2s3x | -0.0148                          | 0.57            | 0.87          | -0.89           | 0.33          | -0.25           | 0.86          | -0.32           | 0.45          | Eukaryotic translation initiation factor 2 subunit 3, X-linked | Q9Z0N1     |
| Eif3a   | 0.0006                           | 0.24            | 0.29          | 0.20            | 0.95          | -0.47           | 0.44          | 0.44            | 0.34          | Eukaryotic translation initiation factor 3 subunit A           | P23116     |
| Eif3b   | -0.0005                          | -0.15           | 0.94          | 0.38            | 0.5           | 0.20            | 0.59          | 0.23            | 0.57          | Eukaryotic translation initiation factor 3 subunit B           | Q8JZQ9     |
| Eif3c   | -0.0008                          | -0.01           | 0.73          | 0.54            | 0.073         | -0.95           | <u>0.0290</u> | 0.53            | 0.064         | Eukaryotic translation initiation factor 3 subunit C           | Q8R1B4     |
| Eif3d   | -0.9017                          | 0.91            | 0.051         | -0.62           | 0.058         | -0.37           | 0.69          | 0.29            | 0.86          | Eukaryotic translation initiation factor 3 subunit D           | O70194     |
| Eif3e   | -0.2729                          | -0.28           | 0.16          | 0.73            | <u>0.0210</u> | -0.09           | 0.64          | 0.45            | 0.19          | Eukaryotic translation initiation factor 3 subunit E           | P60229     |
| Eif3f   | -0.0339                          | 0.82            | 0.19          | -0.17           | 0.46          | 0.69            | 0.24          | 0.65            | 0.55          | Eukaryotic translation initiation factor 3 subunit F           | Q9DCH4     |
| Eif3g   | -0.1939                          | -0.40           | 0.093         | 0.42            | 0.076         | -0.19           | 0.66          | 0.02            | 0.85          | Eukaryotic translation initiation factor 3 subunit G           | Q9Z1D1     |
| Eif3h   | -4.5465                          | -1.55           | <u>0.0160</u> | 1.23            | <u>0.0470</u> | -0.61           | 0.37          | -0.32           | 0.7           | Eukaryotic translation initiation factor 3 subunit H           | Q91WK2     |
| Eif3i   | -0.0799                          | -0.18           | 0.29          | 0.51            | <u>0.0240</u> | -0.11           | 0.65          | 0.32            | 0.23          | Eukaryotic translation initiation factor 3 subunit I           | Q9QZD9     |
| Eif3l   | -1.5462                          | -0.32           | <u>0.0210</u> | 0.72            | <u>0.0001</u> | -0.25           | 0.054         | 0.41            | <u>0.0010</u> | Eukaryotic translation initiation factor 3 subunit L           | Q8QZY1     |
| Eif4a2  | -0.0047                          | 0.41            | 0.92          | -1.14           | 0.53          | -1.15           | 0.59          | -0.73           | 0.63          | Eukaryotic initiation factor 4A-II                             | P10630     |
| Eif4a3  | -0.0035                          | 0.38            | 0.22          | -0.13           | 0.78          | -0.30           | 0.69          | 0.26            | 0.2           | Eukaryotic initiation factor 4A-III                            | Q91VC3     |
| Eif4b   | -0.0695                          | -0.19           | 0.59          | 0.94            | <u>0.0200</u> | -0.12           | 0.91          | 0.75            | <u>0.0330</u> | Eukaryotic translation initiation factor 4B                    | Q8BGD9     |



Table S2: Differentially expressed proteins in cerebral cortex (*continued*)

| gene   | $\pi_{TW/EW} \times \pi_{TF/TW}$ | log2FC<br>TW/EW | padj<br>TW/EW | log2FC<br>TF/TW | padj<br>TF/TW | log2FC<br>EF/EW | padj<br>EF/EW | log2FC<br>TF/EW | padj<br>TF/EW | description                                               | accession  |
|--------|----------------------------------|-----------------|---------------|-----------------|---------------|-----------------|---------------|-----------------|---------------|-----------------------------------------------------------|------------|
| Eif4e  | -0.0868                          | -0.29           | 0.11          | 0.30            | 0.091         | -0.50           | 0.25          | 0.00            | 0.96          | Eukaryotic translation initiation factor 4E               | P63073     |
| Eif4g1 | 0.0364                           | 0.16            | 0.36          | 0.33            | <u>0.0280</u> | 0.45            | 0.17          | 0.50            | 0.095         | Eukaryotic translation initiation factor 4<br>gamma 1     | Q6NZJ6     |
| Eif4g2 | 0.0000                           | 0.02            | 0.99          | 0.15            | 0.59          | 0.22            | 0.71          | 0.17            | 0.69          | Eukaryotic translation initiation factor 4<br>gamma 2     | F7CBP1     |
| Eif4g3 | -0.0013                          | -0.84           | 0.78          | 0.07            | 0.62          | 0.63            | 0.28          | -0.77           | 0.9           | Eukaryotic translation initiation factor 4<br>gamma 3     | A0A0N4SVL0 |
| Eif4h  | 0.0000                           | -0.11           | 0.68          | -0.04           | 0.94          | -0.30           | 0.67          | -0.15           | 0.64          | Eukaryotic translation initiation factor 4H               | Q9WUK2     |
| Eif5   | 0.0000                           | 0.04            | 0.66          | -0.01           | 0.96          | 0.31            | 0.12          | 0.03            | 0.85          | Eukaryotic translation initiation factor 5                | Q8BVV6     |
| Eif5a  | -0.0010                          | -0.10           | 0.47          | 0.25            | 0.75          | -0.28           | 0.19          | 0.15            | 0.92          | Eukaryotic translation initiation factor 5A<br>(Fragment) | A0A0A0MQM0 |
| Eif6   | -5.7090                          | -4.50           | 0.3           | 4.03            | 0.25          | -0.22           | 0.97          | -0.47           | 0.98          | Eukaryotic translation initiation factor 6                | O55135     |
| Eipr1  | 0.0001                           | 0.20            | 0.38          | 0.26            | 0.99          | 0.42            | 0.24          | 0.46            | 0.26          | EARP and GARP complex-interacting<br>protein 1            | Q8K0G5     |
| Elav1  | -0.0372                          | 0.15            | 0.69          | -0.94           | <u>0.0230</u> | -0.60           | 0.22          | -0.78           | <u>0.0180</u> | ELAV-like protein 1                                       | P70372     |
| Elav13 | -0.0441                          | 0.50            | 0.62          | -1.01           | 0.38          | -0.50           | 0.85          | -0.51           | 0.72          | ELAV-like protein 3                                       | Q60900     |
| Elfn1  | 0.0000                           | 1.05            | 0.46          | 0.06            | 1             | 0.36            | 0.87          | 1.11            | 0.25          | Protein ELFN1                                             | Q8C8T7     |
| Elfn2  | -2.4443                          | 1.12            | 0.079         | -1.47           | <u>0.0450</u> | -0.62           | 0.51          | -0.35           | 0.63          | Protein phosphatase 1 regulatory subunit<br>29            | Q68FM6     |
| Elmo1  | -0.0123                          | -0.94           | 0.41          | 0.37            | 0.81          | 0.14            | 0.77          | -0.57           | 0.66          | Engulfment and cell motility protein 1                    | Q8BPU7     |
| Elmo2  | -0.0004                          | 0.07            | 0.85          | -0.30           | 0.57          | 0.40            | 0.27          | -0.23           | 0.65          | Engulfment and cell motility protein 2                    | Q8BHL5     |
| Elob   | 0.0018                           | 0.09            | 0.81          | 0.19            | 0.075         | 0.48            | <u>0.0110</u> | 0.29            | 0.16          | Elongin-B                                                 | A0A3B2WBM3 |
| Eloc   | -0.0010                          | -0.10           | 0.55          | 0.13            | 0.52          | -0.39           | 0.31          | 0.02            | 1             | Elongin-C (Fragment)                                      | A0A087WQE6 |
| Elp2   | 0.0615                           | -0.44           | 0.34          | -0.73           | 0.39          | -0.05           | 0.98          | -1.17           | 0.19          | Elongator complex protein 2                               | Q91WG4     |
| Emb    | 0.0609                           | 0.52            | 0.4           | 0.37            | 0.16          | 0.71            | 0.19          | 0.89            | 0.081         | Embigin                                                   | P21995     |
| Emc1   | -0.0026                          | -0.06           | 0.72          | 0.89            | 0.46          | 0.58            | <u>0.0019</u> | 0.83            | 0.47          | ER membrane protein complex subunit 1                     | Q8C7X2     |
| Emc10  | -0.0084                          | 1.17            | 0.058         | -0.06           | 0.8           | 1.30            | <u>0.0060</u> | 1.11            | 0.066         | ER membrane protein complex subunit 10                    | A0A0X1KG67 |
| Emc4   | -0.0513                          | -0.30           | 0.74          | 1.42            | 0.12          | -0.31           | 0.78          | 1.12            | 0.16          | ER membrane protein complex subunit 4                     | Q9CZX9     |
| Emc7   | -0.0001                          | -0.02           | 0.93          | 0.62            | 0.47          | -0.21           | 0.68          | 0.60            | 0.43          | ER membrane protein complex subunit 7                     | Q9EP72     |
| Emd    | 0.0027                           | -0.09           | 0.82          | -0.96           | 0.43          | -1.23           | <u>0.0430</u> | -1.04           | 0.2           | Emerin                                                    | B7FAU5     |
| Eml1   | -7.8310                          | 4.08            | <u>0.0270</u> | -1.59           | 0.17          | 1.97            | 0.44          | 2.49            | 0.46          | Echinoderm microtubule-associated<br>protein-like 1       | D3Z4J9     |
| Eml2   | 0.0000                           | 0.09            | 0.73          | 0.01            | 1             | 0.26            | 0.42          | 0.10            | 0.55          | Echinoderm microtubule-associated<br>protein-like 2       | E9QK48     |
| Eml5   | 0.0002                           | 0.20            | 0.58          | 0.08            | 0.88          | 0.26            | 0.47          | 0.28            | 0.21          | Echinoderm microtubule-associated<br>protein-like 5       | A0A217FL67 |
| Eml6   | -0.0319                          | -3.62           | 0.27          | 0.18            | 0.82          | -3.13           | 0.58          | -3.44           | 0.61          | Echinoderm microtubule-associated<br>protein-like 6       | Q5SQM0     |
| Enah   | -0.0965                          | 0.65            | 0.79          | -2.48           | 0.26          | -0.62           | 1             | -1.83           | 0.3           | Protein enabled homolog                                   | E9QKR1     |

Table S2: Differentially expressed proteins in cerebral cortex (*continued*)

| gene    | $\pi_{TW/EW} \times \pi_{TF/TW}$ | log2FC<br>TW/EW | padj<br>TW/EW | log2FC<br>TF/TW | padj<br>TF/TW | log2FC<br>EF/EW | padj<br>EF/EW | log2FC<br>TF/EW | padj<br>TF/EW | description                                                                | accession  |
|---------|----------------------------------|-----------------|---------------|-----------------|---------------|-----------------|---------------|-----------------|---------------|----------------------------------------------------------------------------|------------|
| Endod1  | -22.5662                         | 7.67            | <u>0.0490</u> | -6.30           | 0.44          | 0.23            | 0.66          | 1.37            | 0.4           | Endonuclease domain-containing 1 protein                                   | Q8C522     |
| Endog   | 0.0005                           | 0.14            | 0.64          | 0.08            | 0.57          | 0.19            | 0.67          | 0.23            | 0.17          | Endonuclease G, mitochondrial                                              | O08600     |
| Eno1    | -0.0439                          | -0.37           | <u>0.0001</u> | 0.06            | 0.32          | -0.41           | <u>0.0001</u> | -0.31           | <u>0.0001</u> | Alpha-enolase                                                              | P17182     |
| Eno2    | -0.0021                          | -0.64           | <u>0.0050</u> | 0.16            | 0.98          | -0.23           | 0.27          | -0.48           | <u>0.0048</u> | Gamma-enolase                                                              | P17183     |
| Enpp6   | -0.0027                          | 0.08            | 0.78          | -0.98           | 0.48          | -0.61           | 0.19          | -0.89           | 0.2           | Glycerophosphocholine<br>cholinephosphodiesterase ENPP6                    | Q8BGN3     |
| Ensa    | 0.0133                           | -0.43           | 0.3           | -0.18           | 0.47          | -0.09           | 0.65          | -0.60           | 0.053         | Alpha-endosulfine                                                          | P60840     |
| Eny2    | 0.0000                           | 0.00            | 0.85          | 0.10            | 0.48          | 0.39            | 0.27          | 0.11            | 0.91          | Transcription and mRNA export factor<br>ENY2                               | A0A2I3BRK6 |
| Epb41   | -0.0052                          | 0.20            | 0.59          | -0.31           | 0.43          | 0.00            | 0.77          | -0.11           | 0.77          | Band 4.1                                                                   | A2A841     |
| Epb41l2 | -0.0019                          | -0.08           | 0.69          | 0.25            | 0.25          | 0.30            | 0.093         | 0.17            | 0.2           | Band 4.1-like protein 2                                                    | O70318     |
| Epb41l3 | -11.6063                         | 1.96            | 0.23          | -4.83           | <u>0.0120</u> | 0.32            | 0.9           | -2.87           | 0.085         | Band 4.1-like protein 3                                                    | A0A5F8MPE1 |
| Epdr1   | 0.0317                           | 0.87            | <u>0.0130</u> | 0.07            | 0.53          | 0.36            | 0.76          | 0.93            | 0.1           | Mammalian ependymin-related protein 1                                      | Q99M71     |
| Epha4   | -0.0001                          | -0.78           | 0.76          | 0.05            | 0.97          | 0.19            | 0.68          | -0.73           | 0.69          | Ephrin type-A receptor 4                                                   | Q03137     |
| Epn2    | 0.0029                           | 0.08            | 0.56          | 0.43            | 0.46          | 0.40            | 0.4           | 0.51            | 0.27          | Epsin-2                                                                    | J3QNT7     |
| Eprs1   | 0.0001                           | 0.11            | 0.87          | 0.11            | 0.85          | -0.07           | 0.85          | 0.22            | 0.95          | Bifunctional glutamate/proline-tRNA<br>ligase                              | Q8CGC7     |
| Eps15l1 | 0.0010                           | 0.12            | 0.27          | 0.34            | 0.91          | 0.35            | <u>0.0200</u> | 0.46            | <u>0.0120</u> | Epidermal growth factor receptor<br>substrate 15-like 1                    | Q60902     |
| Eps8    | -0.6339                          | 0.88            | 0.11          | -0.88           | 0.14          | 0.34            | 0.89          | 0.00            | 0.75          | Epidermal growth factor receptor kinase<br>substrate 8                     | Q08509     |
| ErbB4   | -0.0078                          | -0.10           | 0.72          | 0.52            | 0.089         | 0.01            | 1             | 0.42            | 0.17          | Receptor tyrosine-protein kinase erbB-4                                    | Q61527     |
| Erbin   | -0.0064                          | 0.23            | 0.5           | -0.22           | 0.38          | 0.65            | 0.062         | 0.01            | 0.98          | ErbB2ip protein                                                            | B2RUJ2     |
| Erc1    | -0.9740                          | 0.97            | 0.083         | -0.83           | 0.076         | 0.24            | 0.97          | 0.14            | 0.73          | ELKS/Rab6-interacting/CAST family<br>member 1                              | V9GXP8     |
| Erc2    | -2.9009                          | 1.05            | 0.53          | -3.34           | <u>0.0010</u> | -1.65           | <u>0.0010</u> | -2.29           | <u>0.0002</u> | ERC protein 2                                                              | Q3UHT7     |
| Ergic1  | -0.6551                          | -0.70           | 0.34          | 1.44            | <u>0.0410</u> | -1.14           | 0.19          | 0.74            | <u>0.0370</u> | Endoplasmic reticulum-Golgi intermediate<br>compartment protein 1          | A0A494BAK4 |
| Erlec1  | -0.0612                          | -0.46           | 0.62          | 0.86            | 0.18          | -1.00           | 0.46          | 0.40            | 0.65          | Endoplasmic reticulum lectin 1                                             | Q8VEH8     |
| Erlin2  | -0.0562                          | 0.41            | 0.31          | -0.35           | 0.17          | 0.03            | 0.86          | 0.06            | 0.85          | Erlin-2                                                                    | Q8BFZ9     |
| Erp29   | 0.0243                           | -0.21           | 0.29          | -0.28           | 0.17          | -0.39           | 0.37          | -0.49           | <u>0.0190</u> | Endoplasmic reticulum resident protein 29                                  | P57759     |
| Erp44   | -0.0015                          | -0.08           | 0.9           | 0.42            | 0.1           | 0.02            | 0.62          | 0.34            | 0.087         | Endoplasmic reticulum resident protein 44                                  | Q9D1Q6     |
| Esyt2   | 0.0032                           | -0.08           | 0.75          | -0.41           | 0.17          | -0.68           | 0.19          | -0.49           | 0.088         | Extended synaptotagmin-2                                                   | Q3TZZ7     |
| Etfa    | -0.0609                          | 0.29            | 0.38          | -0.50           | 0.1           | -0.09           | 0.79          | -0.21           | 0.27          | Electron transfer flavoprotein subunit<br>alpha, mitochondrial             | Q99LC5     |
| Etfb    | -0.1256                          | 0.89            | 0.28          | -0.53           | 0.33          | 0.57            | 0.57          | 0.36            | 0.84          | Electron transfer flavoprotein subunit beta                                | Q9DCW4     |
| Etfldh  | -0.1190                          | 0.24            | 0.29          | -0.68           | <u>0.0440</u> | -0.29           | 0.2           | -0.43           | 0.12          | Electron transfer flavoprotein-ubiquinone<br>oxidoreductase, mitochondrial | Q921G7     |
| Etl4    | -16.2843                         | 1.23            | <u>0.0270</u> | -2.11           | <u>0.0001</u> | -0.72           | 0.12          | -0.88           | <u>0.0200</u> | Enhancer trap locus 4                                                      | E9QAU4     |

Table S2: Differentially expressed proteins in cerebral cortex (*continued*)

| gene     | $\pi_{TW/EW} \times \pi_{TF/TW}$ | log2FC<br>TW/EW | padj<br>TW/EW | log2FC<br>TF/TW | padj<br>TF/TW | log2FC<br>EF/EW | padj<br>EF/EW | log2FC<br>TF/EW | padj<br>TF/EW | description                                             | accession  |
|----------|----------------------------------|-----------------|---------------|-----------------|---------------|-----------------|---------------|-----------------|---------------|---------------------------------------------------------|------------|
| Eva1a    | -2.4235                          | 1.39            | 0.25          | -4.95           | 0.26          | -7.14           | 0.36          | -3.56           | 0.64          | Protein eva-1 homolog A                                 | Q91WM6     |
| Evl      | -0.0247                          | 0.17            | 0.46          | -0.45           | 0.11          | -0.45           | 0.75          | -0.28           | 0.9           | Ena/VASP-like protein (Fragment)                        | A0A1Y7VJA2 |
| Exoc1    | 0.1826                           | 0.22            | 0.2           | 0.44            | <u>0.0020</u> | -0.18           | 0.42          | 0.66            | <u>0.0001</u> | Exocyst complex component 1                             | Q5PPR2     |
| Exoc2    | 0.3476                           | 1.02            | 0.18          | 0.37            | 0.058         | 1.11            | 0.11          | 1.38            | <u>0.0010</u> | Exocyst complex component 2                             | Q9D4H1     |
| Exoc3    | -0.0707                          | -0.14           | 0.52          | 0.58            | <u>0.0009</u> | 0.13            | 0.18          | 0.44            | <u>0.0050</u> | Exocyst complex component 3                             | Q6KAR6     |
| Exoc4    | 0.0000                           | 0.07            | 0.79          | 0.23            | 1             | 0.05            | 0.92          | 0.30            | <u>0.0130</u> | Exocyst complex component 4                             | O35382     |
| Exoc5    | 0.0717                           | 0.25            | 0.26          | 0.49            | 0.1           | 0.16            | 0.68          | 0.74            | <u>0.0200</u> | Exocyst complex component 5                             | Q3TPX4     |
| Exoc6b   | 0.0001                           | 0.12            | 0.62          | 0.04            | 0.76          | -0.02           | 0.96          | 0.15            | 0.54          | Exocyst complex component 6B                            | A6H5Z3     |
| Exoc7    | 0.0000                           | -0.06           | 0.34          | 0.33            | 1             | 0.13            | 0.2           | 0.27            | 1             | Exocyst complex component 7                             | A2AAN0     |
| Exoc8    | 0.0363                           | 0.20            | 0.35          | 0.35            | 0.073         | -0.25           | 0.18          | 0.55            | <u>0.0003</u> | Exocyst complex component 8                             | Q6PGF7     |
| Exog     | 0.0005                           | 2.29            | 0.5           | 0.03            | 0.95          | 0.03            | 0.9           | 2.32            | 0.46          | Nuclease EXOG, mitochondrial                            | Q8C163     |
| Ezr      | -0.0648                          | 0.52            | 0.28          | -0.19           | 0.065         | 0.44            | 0.26          | 0.33            | 0.87          | Ezrin                                                   | P26040     |
| F8a1     | -0.0102                          | 0.44            | 0.79          | -0.90           | 0.56          | 1.41            | <u>0.0430</u> | -0.46           | 0.81          | 40-kDa huntingtin-associated protein                    | Q00558     |
| Fabp3    | 0.0002                           | -0.30           | 0.97          | -0.25           | 0.64          | -0.90           | 0.56          | -0.55           | 0.49          | Fatty acid-binding protein, heart                       | P11404     |
| Fahd2a   | -0.1292                          | 0.33            | 0.15          | -0.37           | 0.052         | -0.44           | 0.33          | -0.05           | 0.9           | Fumarylacetoacetate hydrolase domain-containing 2A      | A0A0R4J094 |
| Fam117b  | -0.1544                          | 1.66            | <u>0.0150</u> | -0.16           | 0.48          | 0.13            | 0.97          | 1.50            | <u>0.0200</u> | Protein FAM117B                                         | Q3U3E2     |
| FAM120A  | -0.0264                          | 0.36            | 0.58          | -0.53           | 0.26          | -0.07           | 0.98          | -0.17           | 0.47          | Constitutive coactivator of PPAR-gamma-like protein 1   | Q6A0A9     |
| Fam120c  | -0.1559                          | 0.72            | 0.53          | -1.23           | 0.23          | 0.31            | 0.4           | -0.51           | 0.49          | Constitutive coactivator of PPAR-gamma-like protein 2   | Q8C3F2     |
| Fam126b  | 0.0008                           | 0.15            | 0.38          | 0.04            | 0.5           | 0.05            | 0.91          | 0.19            | 0.98          | Protein FAM126B                                         | Q8C729     |
| Fam131b  | 0.0097                           | -0.10           | 0.71          | -1.32           | 0.32          | 0.66            | 0.28          | -1.42           | 0.26          | Protein FAM131B                                         | E9Q8P8     |
| Fam171a1 | -0.0877                          | 0.22            | 0.28          | -0.45           | <u>0.0250</u> | -0.62           | 0.14          | -0.23           | 0.05          | Family with sequence similarity 171, member A1          | A2ATK9     |
| Fam171a2 | 0.0000                           | -0.17           | 0.5           | 0.12            | 1             | 0.20            | 0.07          | -0.05           | 0.64          | Protein FAM171A2                                        | A2A699     |
| Fam171b  | -0.0069                          | 0.36            | 0.59          | -0.40           | 0.62          | 0.33            | 0.33          | -0.04           | 0.93          | Protein FAM171B                                         | Q14CH0     |
| Fam193a  | 0.0021                           | 0.23            | 0.83          | 0.71            | 0.69          | 0.42            | 0.75          | 0.94            | 0.46          | Protein FAM193A                                         | M0QWZ1     |
| Fam81a   | -1.5417                          | 1.28            | 0.46          | -2.18           | <u>0.0230</u> | -0.87           | <u>0.0460</u> | -0.90           | <u>0.0210</u> | Protein FAM81A                                          | Q3UXZ6     |
| Fam98b   | -0.0313                          | 0.39            | 0.39          | -0.43           | 0.35          | -0.07           | 0.94          | -0.04           | 0.77          | Protein FAM98B                                          | Q80VD1     |
| Farp1    | -0.9271                          | 0.35            | 0.13          | -0.98           | <u>0.0009</u> | -0.24           | 0.5           | -0.63           | <u>0.0011</u> | FERM, ARHGEF and pleckstrin domain-containing protein 1 | F8VPU2     |
| Farsa    | -0.0499                          | 0.07            | 0.41          | -0.46           | <u>0.0001</u> | -0.24           | <u>0.0210</u> | -0.39           | <u>0.0020</u> | Phenylalanine-tRNA ligase alpha subunit                 | Q8C0C7     |
| Farsb    | -0.0226                          | 0.12            | 0.092         | -0.16           | 0.073         | -0.13           | 0.83          | -0.04           | 0.77          | Phenylalanine-tRNA ligase beta subunit                  | Q9WUA2     |
| Fasn     | -0.0005                          | -0.17           | 0.68          | 0.04            | 0.35          | 0.00            | 0.54          | -0.14           | 0.14          | Fatty acid synthase                                     | P19096     |
| Fbxl16   | -0.0045                          | 0.19            | 0.48          | -0.22           | 0.46          | 0.21            | 0.57          | -0.04           | 0.9           | F-box/LRR-repeat protein 16                             | A2RT62     |
| Fbxo2    | -0.0254                          | 0.25            | 0.51          | -0.61           | 0.27          | -0.40           | 0.17          | -0.37           | 0.42          | F-box only protein 2                                    | Q80UW2     |
| Fbxo41   | -0.0063                          | 0.30            | 0.97          | -1.17           | <u>0.0430</u> | -0.17           | 0.77          | -0.87           | <u>0.0280</u> | F-box only protein 41                                   | Q6NS60     |

Table S2: Differentially expressed proteins in cerebral cortex (*continued*)

| gene    | $\pi_{TW/EW} \times \pi_{TF/TW}$ | log2FC<br>TW/EW | padj<br>TW/EW | log2FC<br>TF/TW | padj<br>TF/TW | log2FC<br>EF/EW | padj<br>EF/EW | log2FC<br>TF/EW | padj<br>TF/EW | description                                                   | accession  |
|---------|----------------------------------|-----------------|---------------|-----------------|---------------|-----------------|---------------|-----------------|---------------|---------------------------------------------------------------|------------|
| Fbxo6   | -0.0232                          | -0.78           | 0.082         | 0.20            | 0.73          | 0.52            | 0.27          | -0.58           | 0.23          | F-box only protein 6                                          | Q9QZN4     |
| Fcho2   | -0.0374                          | -0.19           | 0.8           | 0.78            | <u>0.0025</u> | 0.29            | 0.54          | 0.59            | 0.062         | F-BAR domain only protein 2                                   | Q3UQN2     |
| Fdxr    | -17.9045                         | 8.26            | 0.089         | -4.65           | 0.36          | 3.70            | 0.38          | 3.60            | 0.53          | NADPH:adrenodoxin oxidoreductase, mitochondrial               | Q61578     |
| Fech    | -0.2937                          | 0.51            | 0.19          | -0.32           | <u>0.0032</u> | 0.77            | 0.1           | 0.20            | 0.8           | Ferrochelatase                                                | A0A494BAI5 |
| Fer     | -0.1238                          | 3.42            | 0.72          | -3.35           | 0.84          | -3.50           | 0.47          | 0.06            | 0.89          | Tyrosine-protein kinase Fer                                   | P70451     |
| Fga     | 0.0000                           | 0.09            | 0.5           | 0.02            | 0.9           | 0.16            | 0.49          | 0.11            | 0.65          | Fibrinogen alpha chain                                        | E9PV24     |
| Fh      | 0.0010                           | -0.07           | 0.81          | -0.23           | 0.2           | -0.10           | 0.5           | -0.30           | 0.2           | Fumarate hydratase, mitochondrial                             | P97807     |
| Fibp    | 0.0032                           | 0.26            | 0.37          | 0.12            | 0.58          | 0.04            | 0.76          | 0.38            | <u>0.0280</u> | Acidic fibroblast growth factor intracellular-binding protein | Q8K2D8     |
| Fkbp3   | -0.0054                          | -0.04           | 0.85          | 0.48            | <u>0.0001</u> | 0.21            | <u>0.0060</u> | 0.44            | <u>0.0001</u> | Peptidyl-prolyl cis-trans isomerase FKBP3                     | Q62446     |
| Fkbp8   | 0.0002                           | 0.05            | 0.77          | 0.11            | 0.55          | -0.02           | 0.92          | 0.16            | 0.27          | Peptidyl-prolyl cis-trans isomerase FKBP8                     | Q35465     |
| Flii    | -0.3251                          | 1.11            | 0.23          | -0.83           | 0.28          | 1.34            | <u>0.0012</u> | 0.28            | 0.75          | Protein flightless-1 homolog                                  | Q9JJ28     |
| Flna    | -1.2092                          | 0.36            | 0.22          | -1.45           | <u>0.0003</u> | -0.19           | 0.91          | -1.09           | 0.055         | Filamin, alpha                                                | B7FAU9     |
| Flot1   | -0.0024                          | -0.26           | 0.62          | 0.22            | 0.63          | 0.44            | 0.058         | -0.04           | 0.93          | Flotillin-1                                                   | O08917     |
| Flot2   | -0.0049                          | -0.48           | 0.19          | 0.28            | 0.89          | 0.38            | 0.064         | -0.20           | <u>0.0430</u> | Flotillin                                                     | Q5SS83     |
| Flrt2   | 0.0000                           | 0.63            | <u>0.0170</u> | 0.00            | 0.83          | 0.27            | 0.17          | 0.63            | <u>0.0320</u> | Leucine-rich repeat transmembrane protein FLRT2               | Q8BLU0     |
| Fmn2    | -0.0104                          | 0.32            | 0.46          | -0.33           | 0.51          | 0.48            | 0.47          | 0.00            | 0.88          | Formin-2                                                      | Q9JL04     |
| Fmnl2   | -0.0973                          | 0.43            | 0.37          | -0.75           | 0.2           | 0.80            | <u>0.0360</u> | -0.32           | 0.6           | Formin-like protein 2                                         | A2APV2     |
| Fmr1    | -223.2321                        | 6.23            | <u>0.0410</u> | -8.61           | <u>0.0010</u> | -2.04           | 0.26          | -2.38           | 0.12          | Synaptic functional regulator FMR1                            | D3Z6U8     |
| Fn3k    | 0.0155                           | -0.18           | 0.059         | -0.13           | 0.29          | 0.23            | <u>0.0300</u> | -0.32           | <u>0.0010</u> | Fructosamine-3-kinase                                         | Q9ER35     |
| Foxred1 | -0.0015                          | 0.07            | 0.75          | -0.39           | 0.37          | 0.43            | <u>0.0370</u> | -0.32           | 0.41          | FAD-dependent oxidoreductase domain-containing protein 1      | Q3TQB2     |
| Frmpd3  | -0.0002                          | 0.22            | 0.96          | -0.76           | 0.88          | 0.14            | 0.85          | -0.53           | 0.93          | FERM and PDZ domain-containing 3                              | A0A140LIW3 |
| Fry     | -0.0362                          | 0.31            | 0.46          | -0.72           | 0.33          | -0.35           | 0.71          | -0.40           | 0.79          | Protein furry homolog                                         | A0A5F8MPN1 |
| Fscn1   | 0.0066                           | -0.05           | 0.39          | -0.20           | <u>0.0250</u> | -0.04           | 0.94          | -0.25           | 0.5           | Fascin                                                        | Q61553     |
| Fsd1    | 0.0001                           | 0.08            | 0.8           | 0.06            | 0.67          | -0.29           | 0.63          | 0.14            | 0.64          | Fibronectin type III and SPRY domain-containing protein 1     | Q7TPM6     |
| Fsd1l   | 0.0000                           | -0.02           | 0.92          | -0.02           | 0.84          | 0.33            | 0.17          | -0.04           | 0.7           | FSD1-like protein                                             | J3QM95     |
| Fsip2   | -0.0074                          | 0.23            | 0.32          | -0.21           | 0.49          | -0.06           | 0.85          | 0.03            | 0.87          | Fibrous sheath-interacting protein 2                          | A2ARZ3     |
| Fubp1   | -0.0985                          | -0.36           | 0.47          | 0.45            | <u>0.0140</u> | -0.10           | 0.85          | 0.09            | 0.56          | Far upstream element-binding protein 1                        | Q3UUU2     |
| Fubp3   | -0.0011                          | -0.11           | 0.75          | 0.19            | 0.38          | 0.19            | 0.42          | 0.08            | 0.67          | Far upstream element (FUSE)-binding protein 3                 | A2AJ72     |
| Fxr1    | -0.0066                          | 0.28            | 0.27          | -0.15           | 0.53          | -0.06           | 0.84          | 0.13            | 0.48          | Fragile X mental retardation syndrome-related protein 1       | Q61584     |
| Fyn     | 0.0000                           | -0.05           | 0.83          | 0.00            | 0.89          | 0.19            | 0.49          | -0.05           | 0.93          | Tyrosine-protein kinase Fyn                                   | P39688     |
| G3bp1   | -0.0008                          | 0.22            | 0.87          | -0.38           | 0.71          | 0.85            | 0.54          | -0.16           | 0.78          | Ras GTPase-activating protein-binding protein 1               | P97855     |

Table S2: Differentially expressed proteins in cerebral cortex (*continued*)

| gene      | $\pi_{TW/EW} \times \pi_{TF/TW}$ | log2FC<br>TW/EW | padj<br>TW/EW | log2FC<br>TF/TW | padj<br>TF/TW | log2FC<br>EF/EW | padj<br>EF/EW | log2FC<br>TF/EW | padj<br>TF/EW | description                                                                         | accession  |
|-----------|----------------------------------|-----------------|---------------|-----------------|---------------|-----------------|---------------|-----------------|---------------|-------------------------------------------------------------------------------------|------------|
| G3bp2     | 0.0063                           | 0.85            | 0.25          | 0.55            | 0.95          | 0.15            | 0.64          | 1.40            | 0.28          | Ras GTPase-activating protein-binding protein 2                                     | P97379     |
| G6pdx     | -0.0550                          | -0.28           | <u>0.0280</u> | 0.17            | 0.18          | 0.27            | 0.34          | -0.11           | 0.51          | Glucose-6-phosphate 1-dehydrogenase X                                               | Q00612     |
| Gabarapl2 | -0.0108                          | 0.10            | 0.53          | -0.29           | <u>0.0450</u> | 0.16            | 0.34          | -0.19           | 0.27          | Gamma-aminobutyric acid receptor-associated protein-like 2                          | P60521     |
| Gabbr1    | 0.0000                           | -0.11           | 0.7           | 0.01            | 0.86          | -0.15           | 0.62          | -0.11           | 0.76          | Gamma-aminobutyric acid type B receptor subunit 1                                   | Q9WV18     |
| Gabbr2    | -0.0068                          | -0.24           | 0.63          | 0.24            | 0.26          | 0.22            | 0.29          | 0.00            | 0.66          | Gamma-aminobutyric acid type B receptor subunit 2                                   | Q80T41     |
| Gabra1    | -0.0002                          | 0.14            | 0.34          | -0.06           | 0.88          | 0.08            | 0.44          | 0.08            | 0.26          | Gamma-aminobutyric acid receptor subunit alpha-1                                    | P62812     |
| Gabrb2    | -0.0444                          | 0.59            | 0.33          | -0.49           | 0.48          | 0.03            | 0.44          | 0.10            | 0.73          | Gamma-aminobutyric acid receptor subunit beta-2                                     | P63137     |
| Gabrg2    | -0.0111                          | 0.13            | 0.077         | -0.11           | 0.2           | -0.05           | 0.77          | 0.02            | 0.52          | Gamma-aminobutyric acid receptor subunit gamma-2                                    | P22723     |
| Gad1      | -0.0228                          | 0.28            | 0.15          | -0.20           | 0.32          | 0.09            | 0.83          | 0.09            | 0.93          | Glutamate decarboxylase 1                                                           | P48318     |
| Gad2      | 0.0000                           | 0.01            | 0.99          | -0.26           | 0.057         | 0.00            | 0.94          | -0.25           | <u>0.0300</u> | Glutamate decarboxylase 2                                                           | P48320     |
| Gak       | -0.0040                          | -0.09           | 0.87          | 0.52            | <u>0.0390</u> | -0.15           | 0.21          | 0.43            | 0.08          | Cyclin-G-associated kinase                                                          | A0A0R4J0F6 |
| Galnt2    | 0.0110                           | 0.13            | 0.68          | 0.77            | 0.22          | -0.18           | 0.95          | 0.91            | 0.12          | Polypeptide N-acetylgalactosaminyltransferase 2                                     | Q6PB93     |
| Ganab     | -0.0007                          | -0.14           | 0.32          | 0.06            | 0.67          | 0.02            | 0.93          | -0.08           | 0.56          | Neutral alpha-glucosidase AB                                                        | Q8BHN3     |
| Gap43     | 0.0002                           | -0.04           | 0.83          | -0.22           | 0.5           | -0.02           | 0.51          | -0.27           | 0.39          | Neuromodulin                                                                        | P06837     |
| Gapdh     | 0.0667                           | -0.28           | 0.66          | -0.44           | <u>0.0010</u> | -0.09           | 0.88          | -0.71           | <u>0.0060</u> | Glyceraldehyde-3-phosphate dehydrogenase                                            | A0A0A0MQF6 |
| Gapvd1    | -0.0142                          | 1.05            | 0.67          | -0.90           | 0.82          | 0.23            | 0.64          | 0.15            | 0.62          | GTPase-activating protein and VPS9 domain-containing protein 1                      | Q6PAR5     |
| Gars1     | 0.0010                           | -0.08           | 0.93          | -0.38           | 0.09          | -0.08           | 0.71          | -0.45           | 0.09          | Glycine-tRNA ligase                                                                 | Q9CZD3     |
| Gart      | 0.0146                           | 0.23            | <u>0.0080</u> | 0.07            | 0.37          | 0.01            | 0.69          | 0.31            | <u>0.0020</u> | Trifunctional purine biosynthetic protein adenosine-3                               | Q64737     |
| Gas7      | -0.0001                          | 0.01            | 0.89          | -0.33           | 0.21          | -0.06           | 0.68          | -0.32           | 0.068         | Growth arrest-specific protein 7                                                    | F6QB26     |
| Gatad2b   | -0.0067                          | 0.21            | 0.87          | -1.90           | 0.53          | -1.75           | 0.71          | -1.69           | 0.7           | Gatad2b protein                                                                     | A1L3S7     |
| Gatd1     | 0.0000                           | -0.13           | 0.88          | 0.03            | 0.72          | 0.14            | 0.82          | -0.10           | 0.98          | Glutamine amidotransferase-like class 1 domain-containing protein 1                 | Q8BFQ8     |
| Gatd3a    | -0.8435                          | 0.29            | <u>0.0290</u> | -0.57           | <u>0.0005</u> | -0.24           | 0.23          | -0.28           | <u>0.0180</u> | Glutamine amidotransferase-like class 1 domain-containing protein 3A, mitochondrial | Q9D172     |
| Gcdh      | -0.0020                          | 0.99            | 0.15          | -0.09           | 0.94          | -0.09           | 0.97          | 0.90            | 0.16          | Glutaryl-CoA dehydrogenase, mitochondrial                                           | Q60759     |
| Gcn1      | -0.0803                          | 0.53            | <u>0.0260</u> | -0.30           | 0.48          | 0.21            | 0.5           | 0.23            | 0.48          | eIF-2-alpha kinase activator GCN1                                                   | E9PVA8     |

Table S2: Differentially expressed proteins in cerebral cortex (*continued*)

| gene    | $\pi_{TW/EW} \times \pi_{TF/TW}$ | log2FC<br>TW/EW | padj<br>TW/EW | log2FC<br>TF/TW | padj<br>TF/TW | log2FC<br>EF/EW | padj<br>EF/EW | log2FC<br>TF/EW | padj<br>TF/EW | description                                                      | accession  |
|---------|----------------------------------|-----------------|---------------|-----------------|---------------|-----------------|---------------|-----------------|---------------|------------------------------------------------------------------|------------|
| Gda     | -0.0066                          | -0.33           | 0.47          | 0.25            | 0.57          | -0.36           | 0.14          | -0.09           | 0.94          | Guanine deaminase                                                | Q9R111     |
| Gdap1   | -0.1222                          | 1.01            | 0.068         | -0.24           | 0.37          | -1.33           | 0.41          | 0.76            | 0.2           | Ganglioside-induced differentiation-associated protein 1         | O88741     |
| Gdap11l | -0.0002                          | -0.17           | 0.79          | 0.10            | 0.76          | -0.06           | 0.87          | -0.06           | 0.99          | Ganglioside-induced differentiation-associated protein 1-like 1  | Q3USC7     |
| Gdi1    | 0.0002                           | -0.21           | 0.48          | -0.10           | 0.93          | -0.21           | 0.23          | -0.31           | 0.3           | Rab GDP dissociation inhibitor alpha                             | P50396     |
| Gemin5  | -0.0060                          | 0.19            | 0.38          | -0.14           | 0.29          | 0.05            | 0.88          | 0.05            | 0.86          | Gem-associated protein 5                                         | A2AFQ9     |
| Get3    | -0.0002                          | 0.01            | 0.53          | -0.16           | 0.4           | 0.24            | 0.5           | -0.16           | 0.98          | ATPase GET3                                                      | O54984     |
| Gfod1   | 0.0754                           | 1.06            | 0.65          | 0.93            | 0.39          | 0.85            | 0.62          | 1.99            | 0.15          | Glucose-fructose oxidoreductase domain-containing protein 1      | Q3UHD2     |
| Ggt7    | 0.1031                           | -0.30           | 0.73          | -4.55           | 0.28          | 0.38            | 0.75          | -4.85           | 0.25          | Glutathione hydrolase 7                                          | Q99JP7     |
| Gigyf2  | -1.4396                          | 2.20            | 0.64          | -6.28           | 0.29          | 0.25            | 0.9           | -4.08           | 0.48          | GRB10-interacting GYF protein 2                                  | G3UYG6     |
| Gipcl   | -0.0140                          | 0.50            | 0.35          | -0.26           | 0.58          | -0.05           | 0.5           | 0.24            | 0.54          | PDZ domain-containing protein GIPC1                              | Q9Z0G0     |
| Git1    | -1.9683                          | 0.78            | <u>0.0300</u> | -0.81           | <u>0.0090</u> | -0.08           | 0.59          | -0.04           | 0.75          | ARF GTPase-activating protein GIT1                               | Q5F258     |
| Gjal    | -0.0022                          | 0.37            | 0.97          | -0.74           | 0.24          | 0.10            | 0.88          | -0.37           | 0.11          | Gap junction alpha-1 protein                                     | P23242     |
| Gk      | 0.0070                           | 0.24            | 0.26          | 0.25            | 0.63          | -0.01           | 0.59          | 0.49            | 0.2           | Glycerol kinase                                                  | Q64516     |
| Glg1    | -0.0103                          | -0.10           | 0.88          | 0.69            | <u>0.0020</u> | 0.33            | 0.52          | 0.59            | <u>0.0002</u> | Golgi apparatus protein 1 (Fragment)                             | F8WHM5     |
| Glo1    | -0.0312                          | -0.48           | <u>0.0020</u> | 0.09            | 0.54          | -0.60           | <u>0.0080</u> | -0.39           | 0.067         | Lactoylglutathione lyase                                         | Q9CPU0     |
| Gls     | -0.0074                          | 0.09            | 0.44          | -0.23           | 0.1           | -0.23           | 0.14          | -0.14           | 0.25          | Glutaminase kidney isoform, mitochondrial                        | D3Z7P3     |
| Glud1   | -0.0028                          | -0.02           | 0.87          | 0.78            | <u>0.0010</u> | 0.08            | 0.95          | 0.76            | <u>0.0020</u> | Glutamate dehydrogenase 1, mitochondrial                         | P26443     |
| Glul    | -0.2474                          | -0.31           | 0.17          | 0.54            | <u>0.0120</u> | -0.02           | 0.36          | 0.22            | 0.54          | Glutamine synthetase                                             | P15105     |
| Gm49804 | 0.0000                           | 7.02            | 0.45          | -2.95           | 1             | 0.57            | 0.85          | 4.07            | 0.43          | Predicted gene, 49804                                            | A0A3B2W864 |
| Gmfb    | -0.0155                          | -0.15           | 0.23          | 0.21            | 0.17          | -0.15           | 0.2           | 0.05            | 0.66          | Glia maturation factor beta                                      | Q9CQI3     |
| Gmps    | 0.0000                           | -0.12           | 0.97          | 0.05            | 0.92          | 0.04            | 0.66          | -0.07           | 0.64          | GMP synthase [glutamine-hydrolyzing]                             | Q3THK7     |
| Gna11   | -0.0095                          | -0.30           | 0.15          | 0.22            | 0.67          | 0.15            | 0.32          | -0.08           | 0.38          | Guanine nucleotide-binding protein subunit alpha-11              | P21278     |
| Gna13   | 0.0035                           | -0.17           | 0.67          | -0.24           | 0.32          | -0.08           | 0.77          | -0.41           | 0.17          | Guanine nucleotide-binding protein subunit alpha-13              | P27601     |
| Gnao1   | -0.0011                          | -0.25           | 0.83          | 0.13            | 0.37          | 0.33            | 0.12          | -0.12           | 0.54          | Guanine nucleotide-binding protein G(o) subunit alpha            | P18872     |
| Gnaq    | -0.0002                          | -0.24           | 0.65          | 0.06            | 0.86          | 0.23            | 0.99          | -0.18           | 0.58          | Guanine nucleotide-binding protein G(q) subunit alpha            | P21279     |
| Gnaz    | -0.0183                          | 0.19            | 0.13          | -0.16           | 0.21          | 0.27            | 0.56          | 0.03            | 0.83          | Guanine nucleotide-binding protein G(z) subunit alpha            | O70443     |
| Gnb2    | 0.0000                           | -0.35           | 0.99          | 0.12            | 0.58          | 0.22            | 0.52          | -0.22           | 0.99          | Guanine nucleotide-binding protein G(I)/G(S)/G(T) subunit beta-2 | D3YZX3     |

Table S2: Differentially expressed proteins in cerebral cortex (*continued*)

| gene    | $\pi_{TW/EW} \times \pi_{TF/TW}$ | log2FC<br>TW/EW | padj<br>TW/EW | log2FC<br>TF/TW | padj<br>TF/TW | log2FC<br>EF/EW | padj<br>EF/EW | log2FC<br>TF/EW | padj<br>TF/EW | description                                                        | accession  |
|---------|----------------------------------|-----------------|---------------|-----------------|---------------|-----------------|---------------|-----------------|---------------|--------------------------------------------------------------------|------------|
| Gnb5    | -0.0026                          | 0.13            | 0.71          | -0.27           | 0.32          | 0.53            | 0.74          | -0.14           | 0.65          | Guanine nucleotide-binding protein subunit beta-5                  | P62881     |
| Gng10   | 0.0000                           | 0.02            | 1             | 0.28            | 0.41          | 0.30            | 0.46          | 0.30            | 0.14          | Guanine nucleotide-binding protein G(I)/G(S)/G(O) subunit gamma-10 | Q9CXP8     |
| Gng12   | -0.0371                          | -0.78           | <u>0.0001</u> | 0.29            | 0.91          | 0.31            | 0.051         | -0.49           | <u>0.0270</u> | Guanine nucleotide-binding protein subunit gamma (Fragment)        | A0A0N4SVT3 |
| Gng13   | -0.0332                          | -0.65           | <u>0.0010</u> | 0.15            | 0.77          | 0.33            | 0.23          | -0.50           | <u>0.0120</u> | Guanine nucleotide-binding protein G(I)/G(S)/G(O) subunit gamma-13 | Q9JMF3     |
| Gng2    | -0.0003                          | -0.40           | 0.52          | 0.11            | 0.95          | 0.02            | 0.82          | -0.28           | 0.5           | Guanine nucleotide-binding protein G(I)/G(S)/G(O) subunit gamma-2  | P63213     |
| Gng5    | -0.3609                          | -0.83           | 0.11          | 0.57            | 0.16          | 0.45            | 0.23          | -0.26           | 0.18          | Guanine nucleotide-binding protein G(I)/G(S)/G(O) subunit gamma-5  | Q80SZ7     |
| Gnl1    | 0.0003                           | 0.20            | 0.26          | 0.02            | 0.77          | -0.35           | 0.13          | 0.22            | <u>0.0300</u> | Guanine nucleotide-binding protein-like 1                          | P36916     |
| Golga2  | 0.0405                           | 0.17            | 0.22          | 0.30            | 0.062         | 0.31            | 0.061         | 0.47            | <u>0.0010</u> | Golgin subfamily A member 2                                        | A0A6I8MX07 |
| Golga3  | -0.0483                          | 0.31            | 0.22          | -0.36           | 0.22          | 0.35            | 0.065         | -0.05           | 0.94          | Golgin subfamily A member 3                                        | A0A0R4J1H6 |
| GOLGA7B | 0.0000                           | -0.13           | 0.59          | 0.02            | 0.92          | 0.36            | 0.094         | -0.11           | 0.67          | Golgin subfamily A member 7B                                       | Q9D428     |
| Golgb1  | -0.0898                          | -0.11           | 0.6           | 0.92            | <u>0.0001</u> | 0.49            | 0.36          | 0.81            | <u>0.0010</u> | Golgi autoantigen, golgin subfamily b, macrogolgin 1               | E9PVZ8     |
| Got1    | 0.2686                           | -0.44           | <u>0.0001</u> | -0.13           | 0.067         | -0.21           | <u>0.0028</u> | -0.56           | <u>0.0010</u> | Aspartate aminotransferase, cytoplasmic                            | P05201     |
| Got2    | -0.3490                          | 0.14            | 0.06          | -0.51           | <u>0.0001</u> | -0.16           | 0.45          | -0.37           | 0.2           | Aspartate aminotransferase, mitochondrial                          | P05202     |
| Gpc1    | -0.0116                          | 0.45            | 0.23          | -0.16           | 0.56          | 0.05            | 0.85          | 0.28            | 0.42          | Glypican-1                                                         | Q9QZF2     |
| Gpc4    | -0.0033                          | 0.35            | 0.4           | -0.18           | 0.74          | -0.31           | 0.61          | 0.17            | 0.74          | Glypican-4                                                         | P51655     |
| Gpd1    | 0.0000                           | -0.02           | 0.88          | 0.17            | 0.72          | -0.89           | 0.13          | 0.16            | 0.76          | Glycerol-3-phosphate dehydrogenase [NAD(+)]                        | E0CXN5     |
| Gpd1l   | 0.0064                           | -0.32           | 0.17          | -0.11           | 0.58          | -0.57           | <u>0.0190</u> | -0.43           | 0.14          | Glycerol-3-phosphate dehydrogenase 1-like protein                  | Q3ULJ0     |
| Gpd2    | -0.0002                          | 0.01            | 0.22          | -0.03           | 0.1           | -0.01           | 0.46          | -0.02           | 0.96          | Glycerol-3-phosphate dehydrogenase, mitochondrial                  | Q64521     |
| Gphn    | -0.0590                          | 0.41            | 0.15          | -0.29           | 0.25          | 0.01            | 0.37          | 0.12            | 0.21          | Gephyrin                                                           | Q8BUV3     |
| Gpi     | 0.0002                           | -0.34           | 0.49          | -0.03           | 0.89          | -0.32           | 0.49          | -0.37           | 0.49          | Glucose-6-phosphate isomerase                                      | P06745     |
| Gpm6a   | -0.9876                          | 1.18            | 0.17          | -1.32           | 0.15          | -1.59           | 0.47          | -0.14           | 0.87          | Neuronal membrane glycoprotein M6-a                                | P35802     |
| Gpm6b   | -0.0003                          | -0.18           | 0.65          | 0.08            | 0.78          | 0.00            | 1             | -0.10           | 0.56          | Neuronal membrane glycoprotein M6-b                                | A2AEG6     |
| Gpr158  | -0.0334                          | -0.20           | 0.63          | 0.33            | <u>0.0030</u> | 0.02            | 0.89          | 0.13            | <u>0.0430</u> | Probable G-protein coupled receptor 158                            | Q8C419     |
| Gpr162  | -0.0423                          | 0.42            | 0.17          | -0.25           | 0.3           | 0.28            | 0.49          | 0.18            | 0.5           | Probable G-protein coupled receptor 162                            | Q3UN16     |
| Gprasp1 | -0.9802                          | 1.90            | 0.41          | -2.41           | 0.28          | 0.99            | 0.63          | -0.52           | 0.51          | G-protein coupled receptor-associated sorting protein 1            | Q5U4C1     |
| Gprc5b  | -0.0897                          | -0.46           | <u>0.0200</u> | 0.47            | 0.57          | 0.20            | 0.88          | 0.01            | 0.38          | G protein-coupled receptor family C group 5 member B variant 2     | D2DFA9     |

Table S2: Differentially expressed proteins in cerebral cortex (*continued*)

| gene     | $\pi_{TW/EW} \times \pi_{TF/TW}$ | log2FC<br>TW/EW | padj<br>TW/EW | log2FC<br>TF/TW | padj<br>TF/TW | log2FC<br>EF/EW | padj<br>EF/EW | log2FC<br>TF/EW | padj<br>TF/EW | description                                        | accession  |
|----------|----------------------------------|-----------------|---------------|-----------------|---------------|-----------------|---------------|-----------------|---------------|----------------------------------------------------|------------|
| Gprin1   | -0.0094                          | -0.50           | 0.38          | 0.30            | 0.71          | 0.18            | 0.65          | -0.20           | 0.26          | G protein-regulated inducer of neurite outgrowth 1 | Q3UNH4     |
| Gprin3   | -0.1925                          | -0.40           | 0.29          | 0.66            | <u>0.0440</u> | 0.62            | 0.12          | 0.26            | 0.36          | G protein-regulated inducer of neurite outgrowth 3 | Q8BWS5     |
| Gps1     | -0.0532                          | -0.32           | 0.063         | 0.28            | 0.32          | -0.20           | 0.2           | -0.04           | 0.69          | COP9 signalosome complex subunit 1                 | A0A140LJB7 |
| Gpsm1    | -5.5338                          | 0.91            | 0.3           | -7.78           | <u>0.0320</u> | -0.84           | 0.87          | -6.87           | 0.2           | G-protein-signaling modulator 1 (Fragment)         | F6SX81     |
| Gpx1     | 0.1571                           | -0.91           | 0.25          | -1.04           | 0.53          | -0.03           | 0.92          | -1.95           | <u>0.0470</u> | Glutathione peroxidase 1                           | P11352     |
| Grb2     | 0.0220                           | -0.24           | 0.16          | -0.26           | 0.36          | -0.62           | <u>0.0040</u> | -0.50           | 0.095         | Growth factor receptor-bound protein 2             | B1AT92     |
| Grc10    | 0.0000                           | 0.03            | 0.98          | -0.28           | 0.36          | 0.39            | 0.22          | -0.24           | 0.33          | Protein C10                                        | O35127     |
| Gria1    | 0.0000                           | 0.00            | 0.75          | 0.06            | 0.89          | 0.02            | 0.47          | 0.06            | 0.93          | Glutamate receptor                                 | F6YNQ1     |
| Gria2    | 0.0000                           | -0.16           | 0.96          | 0.02            | 0.25          | 0.22            | 0.7           | -0.15           | 0.2           | Glutamate receptor                                 | E9QKC0     |
| Gria4    | -0.0619                          | -0.27           | <u>0.0070</u> | 0.12            | 0.13          | 0.29            | <u>0.0010</u> | -0.15           | 0.1           | Glutamate receptor                                 | G5E863     |
| Grid2    | 0.0246                           | -0.63           | 0.6           | -0.48           | 0.43          | -0.46           | 0.56          | -1.11           | 0.087         | Glutamate receptor ionotropic, delta-2             | Q61625     |
| Grin1    | -0.0395                          | 0.34            | 0.95          | -1.74           | <u>0.0010</u> | -0.19           | 0.48          | -1.41           | <u>0.0001</u> | Glutamate receptor                                 | A2AI21     |
| Grin2a   | -15.5557                         | 1.47            | <u>0.0290</u> | -2.23           | <u>0.0008</u> | 0.11            | 0.98          | -0.75           | <u>0.0170</u> | Glutamate receptor ionotropic, NMDA 2A             | P35436     |
| Grin2b   | -0.2257                          | 0.27            | 0.29          | -0.96           | <u>0.0240</u> | -0.14           | 0.28          | -0.68           | 0.12          | Glutamate receptor                                 | G3X9V4     |
| Grip1    | -0.7186                          | 1.35            | 0.44          | -1.94           | 0.17          | -1.16           | 0.44          | -0.59           | 0.59          | Glutamate receptor-interacting protein 1           | D3YWY4     |
| Grip2    | -17.4458                         | 3.82            | 0.27          | -5.12           | <u>0.0270</u> | -0.57           | 0.65          | -1.30           | 0.22          | Glutamate receptor-interacting protein 2           | E0CXE0     |
| Gripap1  | -0.3263                          | 0.91            | 0.12          | -0.61           | 0.23          | 0.37            | 0.41          | 0.30            | 0.47          | GRIP1-associated protein 1                         | A2AEW8     |
| Grk2     | 0.0000                           | 0.14            | 0.36          | 0.00            | 0.56          | 0.00            | 0.59          | 0.14            | 0.78          | Beta-adrenergic receptor kinase 1                  | Q99MK8     |
| Grm1     | 0.0000                           | -0.40           | 0.62          | 0.00            | 0.8           | 0.16            | 0.9           | -0.40           | 0.77          | Metabotropic glutamate receptor 1                  | P97772     |
| Grm2     | -0.1767                          | -0.77           | <u>0.0001</u> | 0.18            | 0.48          | 0.12            | 0.32          | -0.58           | <u>0.0001</u> | Metabotropic glutamate receptor 2                  | Q14BI2     |
| Grm3     | -0.0016                          | -0.39           | 0.092         | 0.07            | 0.88          | 0.15            | 0.27          | -0.32           | 0.45          | Metabotropic glutamate receptor 3                  | Q9QYS2     |
| Grm5     | -0.0023                          | -0.37           | 0.55          | 0.12            | 0.63          | -0.07           | 0.76          | -0.24           | 0.78          | Metabotropic glutamate receptor 5                  | Q3UVX5     |
| Grm7     | 0.0005                           | -0.05           | 0.93          | -0.39           | 0.18          | 0.04            | 0.97          | -0.44           | <u>0.0150</u> | Metabotropic glutamate receptor 7                  | Q68ED2     |
| Grpel1   | -0.0001                          | 0.03            | 0.79          | -0.20           | 0.73          | -0.26           | 0.051         | -0.17           | 0.41          | GrpE protein homolog 1, mitochondrial              | Q99LP6     |
| Gsk3b    | -0.0001                          | -0.15           | 0.95          | 0.21            | 0.73          | -0.05           | 0.56          | 0.05            | 0.74          | Glycogen synthase kinase-3 beta                    | E9QAQ5     |
| Gsn      | 0.0000                           | -0.02           | 0.85          | -0.02           | 0.55          | 0.32            | 0.2           | -0.04           | 0.47          | Gelsolin                                           | P13020     |
| Gsta4    | -0.4967                          | -0.63           | <u>0.0002</u> | 0.29            | 0.19          | -0.75           | <u>0.0001</u> | -0.35           | <u>0.0280</u> | Glutathione S-transferase A4                       | P24472     |
| Gstm1    | -0.0005                          | 0.03            | 0.85          | -0.47           | 0.34          | -0.76           | 0.38          | -0.44           | 0.43          | Glutathione transferase                            | A2AE89     |
| Gstp1    | -0.1279                          | -0.31           | 0.082         | 0.37            | 0.094         | -0.38           | 0.065         | 0.06            | 0.7           | Glutathione S-transferase P 1                      | P19157     |
| Gstz1    | 0.0001                           | -0.07           | 0.61          | -0.09           | 0.81          | -0.29           | 0.53          | -0.16           | 0.52          | Maleylacetoacetate isomerase                       | A0A1Y7VNC1 |
| Gtf2i    | 0.5874                           | 4.24            | 0.35          | 1.07            | 0.52          | 5.35            | 0.084         | 5.31            | 0.16          | General transcription factor II-I                  | Q3UHU8     |
| Gtpbp1   | -0.0970                          | 0.41            | 0.11          | -0.31           | 0.16          | -0.24           | 0.21          | 0.10            | 0.66          | GTP-binding protein 1                              | O08582     |
| Gucyl1a2 | 0.0012                           | -0.17           | 0.3           | -0.09           | 0.71          | -0.01           | 0.42          | -0.26           | 0.29          | Guanylate cyclase                                  | F8VQK3     |
| H1-0     | -0.4741                          | 0.93            | 0.39          | -1.62           | 0.17          | -0.26           | 0.65          | -0.69           | 0.73          | Histone H1.0                                       | P10922     |
| H1-4     | -0.5940                          | 1.03            | 0.13          | -0.79           | 0.15          | -0.03           | 0.97          | 0.23            | 0.87          | Histone H1.4                                       | P43274     |



Table S2: Differentially expressed proteins in cerebral cortex (*continued*)

| gene    | $\pi_{TW/EW} \times \pi_{TF/TW}$ | log2FC<br>TW/EW | padj<br>TW/EW | log2FC<br>TF/TW | padj<br>TF/TW | log2FC<br>EF/EW | padj<br>EF/EW | log2FC<br>TF/EW | padj<br>TF/EW | description                                                                    | accession  |
|---------|----------------------------------|-----------------|---------------|-----------------|---------------|-----------------|---------------|-----------------|---------------|--------------------------------------------------------------------------------|------------|
| H2ax    | -0.1928                          | 1.09            | 0.45          | -1.60           | 0.48          | -0.27           | 0.87          | -0.51           | 0.93          | Histone H2AX                                                                   | P27661     |
| H2az2   | -0.0001                          | 0.05            | 0.71          | -0.27           | 0.9           | 0.28            | 0.61          | -0.22           | 0.87          | Histone H2A.V                                                                  | Q3THW5     |
| H3f3a   | -0.2981                          | 0.85            | 0.33          | -1.01           | 0.19          | -0.19           | 0.68          | -0.16           | 0.9           | Histone H3                                                                     | F8WI35     |
| H4c1    | -2.5667                          | 0.71            | 0.13          | -1.36           | <u>0.0010</u> | 0.12            | 0.53          | -0.65           | 0.2           | Histone H4                                                                     | P62806     |
| Hacd3   | -0.1049                          | 0.60            | 0.25          | -0.54           | 0.29          | 0.00            | 0.63          | 0.06            | 0.87          | Very-long-chain (3R)-3-hydroxyacyl-CoA dehydratase 3                           | Q8K2C9     |
| Hadh    | -0.0519                          | -0.20           | 0.19          | 0.32            | 0.075         | -0.23           | 0.3           | 0.13            | 0.58          | Hydroxyacyl-coenzyme A dehydrogenase, mitochondrial                            | Q61425     |
| Hadha   | 0.0024                           | 0.09            | 0.47          | 0.08            | 0.1           | 0.07            | 0.24          | 0.17            | <u>0.0001</u> | Trifunctional enzyme subunit alpha, mitochondrial                              | Q8BMS1     |
| Hadhb   | -0.3029                          | 0.35            | 0.078         | -0.55           | <u>0.0380</u> | 0.02            | 0.88          | -0.20           | 0.61          | Trifunctional enzyme subunit beta, mitochondrial                               | Q99JY0     |
| Hagh    | 0.0003                           | 0.02            | 0.66          | 0.17            | 0.27          | -0.07           | 0.44          | 0.19            | 0.078         | Hydroxyacylglutathione hydrolase, mitochondrial                                | A0A0R4J052 |
| Hapln1  | 0.0061                           | -0.21           | 0.11          | -0.07           | 0.37          | -0.20           | 0.086         | -0.28           | <u>0.0020</u> | Hyaluronan and proteoglycan link protein 1                                     | Q9QUP5     |
| Hapln4  | 0.0004                           | 0.06            | 0.84          | 0.26            | 0.46          | 0.19            | 0.65          | 0.32            | 0.41          | Hyaluronan and proteoglycan link protein 4                                     | Q80WM4     |
| Hars1   | 0.0004                           | -0.32           | 0.68          | -0.04           | 0.66          | -0.01           | 0.73          | -0.36           | 0.39          | Histidine-tRNA ligase, cytoplasmic                                             | Q61035     |
| Hba     | -2.0843                          | -0.57           | <u>0.0006</u> | 0.38            | <u>0.0010</u> | -0.56           | <u>0.0010</u> | -0.19           | 0.24          | Hemoglobin subunit alpha                                                       | P01942     |
| Hbb-bs  | 0.0003                           | 0.02            | 0.41          | 0.17            | 0.64          | -0.14           | 0.92          | 0.19            | 0.16          | Beta-globin                                                                    | A8DUK4     |
| Hcfc1   | -0.0002                          | -0.15           | 0.97          | 0.24            | 0.36          | 0.16            | 0.57          | 0.09            | 0.4           | Host cell factor 1                                                             | B1AUX2     |
| Hcn2    | -0.0010                          | 0.15            | 0.6           | -0.19           | 0.69          | 0.17            | 0.59          | -0.04           | 0.84          | Potassium/sodium hyperpolarization-activated cyclic nucleotide-gated channel 2 | O88703     |
| Hdac6   | 0.0006                           | 0.14            | 0.69          | 0.10            | 0.52          | 0.21            | 0.47          | 0.24            | 0.5           | Histone deacetylase 6 (Fragment)                                               | A0A1B0GX25 |
| Hdgf3   | -5.8693                          | 1.15            | <u>0.0180</u> | -1.29           | <u>0.0054</u> | -0.20           | 0.6           | -0.14           | 0.98          | Hepatoma-derived growth factor-related protein 3                               | Q9JMG7     |
| Hdhd3   | -0.0524                          | 0.34            | 0.28          | -0.45           | 0.24          | -0.66           | 0.66          | -0.11           | 0.91          | Haloacid dehalogenase-like hydrolase domain-containing protein 3               | Q9CYW4     |
| Hdlbp   | -0.0579                          | -0.10           | 0.52          | 0.51            | <u>0.0001</u> | 0.14            | 0.83          | 0.42            | <u>0.0001</u> | Vigilin                                                                        | Q8VDJ3     |
| Heatr1  | 0.0554                           | 1.21            | 0.44          | 0.36            | 0.44          | -3.80           | 0.44          | 1.57            | 0.21          | HEAT repeat-containing protein 1                                               | G3X9B1     |
| Hectd1  | 0.0031                           | -0.10           | 0.54          | -0.19           | 0.25          | 0.04            | 0.95          | -0.29           | 0.12          | HECT-type E3 ubiquitin transferase                                             | F8WIE5     |
| Hectd3  | 0.0116                           | 0.38            | 0.4           | 0.24            | 0.48          | 0.29            | 0.42          | 0.62            | 0.2           | E3 ubiquitin-protein ligase HECTD3                                             | Q3U487     |
| Hectd4  | 0.0000                           | 0.23            | 0.19          | 0.00            | 0.36          | 0.12            | 0.56          | 0.22            | 0.76          | HECT domain E3 ubiquitin protein ligase 4                                      | E9Q2E4     |
| Hecw1   | -0.0029                          | 0.18            | 0.62          | -0.30           | 0.55          | 0.16            | 0.66          | -0.12           | 0.8           | E3 ubiquitin-protein ligase HECW1                                              | Q8K4P8     |
| Hecw2   | -0.0004                          | 0.02            | 0.74          | -0.20           | 0.2           | 0.21            | 0.37          | -0.18           | 0.33          | E3 ubiquitin-protein ligase HECW2                                              | Q6I6G8     |
| Hepacam | 0.0004                           | 0.14            | 0.3           | 0.08            | 0.86          | -0.25           | 0.2           | 0.22            | 0.11          | Hepatocyte cell adhesion molecule                                              | Q640R3     |

Table S2: Differentially expressed proteins in cerebral cortex (*continued*)

| gene      | $\pi_{TW/EW} \times \pi_{TF/TW}$ | log2FC<br>TW/EW | padj<br>TW/EW | log2FC<br>TF/TW | padj<br>TF/TW | log2FC<br>EF/EW | padj<br>EF/EW | log2FC<br>TF/EW | padj<br>TF/EW | description                                                                | accession |
|-----------|----------------------------------|-----------------|---------------|-----------------|---------------|-----------------|---------------|-----------------|---------------|----------------------------------------------------------------------------|-----------|
| Herc1     | -1.2933                          | 2.14            | 0.14          | -1.47           | 0.33          | 1.52            | 0.17          | 0.67            | 0.46          | HECT and RLD domain-containing E3 ubiquitin protein ligase family member 1 | E9PZP8    |
| Hexa      | -0.1102                          | -1.14           | 0.45          | 0.90            | 0.49          | 0.91            | 0.12          | -0.23           | 0.93          | Beta-hexosaminidase subunit alpha                                          | P29416    |
| Hexb      | 0.0000                           | -0.07           | 0.55          | 0.22            | 1             | 0.42            | 0.24          | 0.15            | 0.54          | Beta-hexosaminidase subunit beta                                           | P20060    |
| Hibch     | -0.0268                          | 0.40            | 0.59          | -0.56           | 0.3           | -0.49           | 0.86          | -0.16           | 0.99          | 3-hydroxyisobutyryl-CoA hydrolase, mitochondrial                           | Q8QZS1    |
| Hid1      | -0.0039                          | -0.20           | 0.5           | 0.22            | 0.51          | 0.12            | 0.51          | 0.01            | 0.83          | Protein HID1                                                               | Q8R1F6    |
| Hint2     | 0.0171                           | -0.22           | 0.62          | -0.57           | 0.22          | 0.05            | 0.8           | -0.78           | 0.19          | Histidine triad nucleotide-binding protein 2, mitochondrial                | Q9D0S9    |
| Hip1      | -0.0943                          | -0.26           | 0.78          | 0.84            | <u>0.0001</u> | 0.23            | 0.18          | 0.58            | <u>0.0003</u> | Huntingtin-interacting protein 1                                           | Q8VD75    |
| Hip1r     | 0.1112                           | 0.35            | 0.2           | 0.63            | 0.19          | 0.35            | 0.22          | 0.98            | <u>0.0270</u> | Huntingtin-interacting protein 1-related protein                           | Q9JKY5    |
| Hist2h2bb | -1.0808                          | 1.48            | 0.33          | -2.17           | 0.2           | -10.20          | 0.17          | -0.69           | 0.57          | Histone H2B type 2-B                                                       | Q64525    |
| Hk1       | 0.0003                           | 0.02            | 0.37          | 0.11            | 0.54          | -0.14           | <u>0.0040</u> | 0.13            | 0.052         | Hexokinase                                                                 | G3UVV4    |
| Hmgb1     | 0.0000                           | -0.05           | 1             | 0.01            | 0.92          | -0.09           | 0.77          | -0.04           | 0.91          | High mobility group protein B1                                             | P63158    |
| Hmgcl     | 0.0676                           | 0.36            | 0.063         | 0.21            | 0.18          | -0.65           | 0.29          | 0.57            | <u>0.0130</u> | Hydroxymethylglutaryl-CoA lyase, mitochondrial                             | P38060    |
| Hnrnpa0   | -0.0006                          | 0.61            | 0.91          | -0.58           | 0.91          | -0.63           | 0.19          | 0.03            | 0.94          | Heterogeneous nuclear ribonucleoprotein A0                                 | Q9CX86    |
| Hnrnpa1   | -0.0010                          | 0.21            | 0.75          | -0.26           | 0.72          | -1.04           | <u>0.0410</u> | -0.05           | 0.98          | Heterogeneous nuclear ribonucleoprotein A1                                 | P49312    |
| Hnrnpa2b1 | -0.0078                          | 0.16            | 0.66          | -0.46           | 0.26          | -0.74           | <u>0.0310</u> | -0.30           | 0.26          | Heterogeneous nuclear ribonucleoproteins A2/B1                             | O88569    |
| Hnrnpa3   | -3.1680                          | 2.60            | 0.3           | -2.63           | 0.13          | -0.53           | 0.4           | -0.03           | 0.8           | Heterogeneous nuclear ribonucleoprotein A3                                 | A2AL12    |
| Hnrnpab   | 0.0000                           | -0.13           | 0.96          | -0.07           | 0.59          | -0.36           | 0.7           | -0.20           | 0.98          | Heterogeneous nuclear ribonucleoprotein A/B                                | Q99020    |
| Hnrnpc    | -0.0012                          | 0.24            | 0.74          | -0.43           | 0.82          | -1.68           | <u>0.0120</u> | -0.19           | 0.86          | Heterogeneous nuclear ribonucleoproteins C1/C2                             | Q9Z204    |
| Hnrnpd    | 0.0013                           | -0.18           | 0.71          | -0.08           | 0.25          | -0.56           | <u>0.0440</u> | -0.26           | 0.093         | Heterogeneous nuclear ribonucleoprotein D0 (Fragment)                      | F6ZV59    |
| Hnrnpdl   | 0.0003                           | 0.25            | 0.72          | 0.06            | 0.76          | -0.19           | 0.75          | 0.30            | 0.38          | Heterogeneous nuclear ribonucleoprotein D-like                             | D3YTD3    |
| Hnrnpf    | -0.0016                          | 0.19            | 0.79          | -0.36           | 0.59          | -0.43           | 0.089         | -0.17           | 0.52          | Heterogeneous nuclear ribonucleoprotein F                                  | Q9Z2X1    |
| Hnrnph1   | 0.0000                           | 0.00            | 1             | -0.57           | 0.24          | -0.30           | 0.16          | -0.57           | 0.091         | Heterogeneous nuclear ribonucleoprotein H                                  | O35737    |
| Hnrnph3   | -0.1600                          | 0.35            | 0.32          | -0.80           | 0.07          | -0.20           | 0.21          | -0.44           | 0.089         | Heterogeneous nuclear ribonucleoprotein H3                                 | D3YWT1    |
| Hnrnpk    | 0.0000                           | 0.00            | 0.88          | -0.04           | 0.85          | -0.17           | 0.59          | -0.03           | 0.93          | Heterogeneous nuclear ribonucleoprotein K                                  | P61979    |

Table S2: Differentially expressed proteins in cerebral cortex (*continued*)

| gene     | $\pi_{TW/EW} \times \pi_{TF/TW}$ | log2FC<br>TW/EW | padj<br>TW/EW | log2FC<br>TF/TW | padj<br>TF/TW | log2FC<br>EF/EW | padj<br>EF/EW | log2FC<br>TF/EW | padj<br>TF/EW | description                                              | accession  |
|----------|----------------------------------|-----------------|---------------|-----------------|---------------|-----------------|---------------|-----------------|---------------|----------------------------------------------------------|------------|
| Hnrnpl   | -0.1948                          | 0.67            | 0.24          | -0.63           | 0.18          | -0.51           | 0.25          | 0.04            | 0.96          | Heterogeneous nuclear ribonucleoprotein L (Fragment)     | G5E924     |
| Hnrnp1l  | -0.0722                          | 0.55            | 0.097         | -0.30           | 0.37          | 0.28            | 0.44          | 0.25            | 0.45          | Heterogeneous nuclear ribonucleoprotein L-like           | Q921F4     |
| Hnrnpm   | -0.0006                          | 0.41            | 0.95          | -1.11           | 0.88          | -1.59           | <u>0.0022</u> | -0.70           | 0.069         | Heterogeneous nuclear ribonucleoprotein M                | Q9D0E1     |
| Hnrnpu   | -0.0042                          | 0.11            | 0.38          | -0.28           | 0.47          | -0.47           | 0.54          | -0.17           | 0.8           | Heterogeneous nuclear ribonucleoprotein U                | Q8VEK3     |
| Hnrnpul2 | -0.0130                          | -0.26           | 0.55          | 0.40            | 0.33          | -0.02           | 0.63          | 0.14            | 0.55          | Heterogeneous nuclear ribonucleoprotein U-like protein 2 | Q00PI9     |
| Homer1   | -16.0534                         | 1.23            | <u>0.0130</u> | -1.73           | <u>0.0001</u> | 0.10            | 0.6           | -0.50           | 0.068         | Homer protein homolog 1                                  | Q9Z2Y3     |
| Homer2   | -2.5984                          | 0.60            | <u>0.073</u>  | -1.27           | <u>0.0010</u> | -0.39           | 0.5           | -0.67           | 0.13          | Homer protein homolog 2                                  | Q9QWW1     |
| Homer3   | -0.0009                          | 0.59            | 0.68          | -0.43           | 0.95          | -1.50           | 0.49          | 0.16            | 0.92          | Homer protein homolog 3                                  | Q99JP6     |
| Hook3    | -0.0431                          | -0.36           | 0.58          | 0.68            | 0.18          | 0.18            | 0.58          | 0.32            | 0.39          | Protein Hook homolog 3                                   | Q8BUK6     |
| Hprt1    | -0.1389                          | -0.54           | 0.14          | 0.30            | 0.099         | -0.29           | 0.86          | -0.24           | 0.68          | Hypoxanthine-guanine phosphoribosyltransferase           | P00493     |
| Hsd17b10 | -0.0031                          | 0.13            | 0.43          | -0.14           | 0.34          | 0.53            | 0.16          | -0.01           | 0.83          | 3-hydroxyacyl-CoA dehydrogenase type-2                   | A2AFQ2     |
| Hsd17b11 | -0.0421                          | 0.11            | 0.73          | -2.18           | 0.052         | -0.29           | 0.69          | -2.07           | 0.093         | Estradiol 17-beta-dehydrogenase 11                       | Q9EQ06     |
| Hsd17b4  | 0.0205                           | 0.19            | <u>0.0290</u> | 0.15            | 0.34          | 0.43            | 0.16          | 0.34            | 0.16          | Peroxisomal multifunctional enzyme type 2                | P51660     |
| Hsd17b8  | -0.0010                          | 0.10            | 0.95          | -0.73           | 0.26          | -0.78           | 0.17          | -0.62           | 0.29          | Estradiol 17-beta-dehydrogenase 8                        | P50171     |
| Hsd1l    | -0.0002                          | 0.06            | 0.83          | -0.12           | 0.48          | 0.25            | 0.2           | -0.06           | 0.58          | Inactive hydroxysteroid dehydrogenase-like protein 1     | A0A1D5RLG0 |
| Hsd12    | -0.2519                          | 0.37            | <u>0.0310</u> | -0.31           | <u>0.0350</u> | 0.40            | 0.77          | 0.06            | 0.63          | Hydroxysteroid dehydrogenase-like protein 2              | Q2TPA8     |
| Hsp90aa1 | 0.0010                           | 0.05            | 0.39          | 0.08            | 0.25          | 0.12            | 0.15          | 0.13            | <u>0.0200</u> | Heat shock protein HSP 90-alpha                          | P07901     |
| Hsp90ab1 | 0.0006                           | 0.08            | 0.35          | 0.03            | 0.26          | 0.06            | 0.76          | 0.10            | 0.98          | Heat shock protein HSP 90-beta                           | P11499     |
| Hsp90b1  | -0.0236                          | -0.19           | <u>0.0180</u> | 0.14            | 0.31          | -0.08           | 0.17          | -0.05           | 0.11          | Endoplasmic reticulum chaperone BiP                      | P08113     |
| Hspa12a  | -0.0106                          | 0.02            | 0.56          | -0.70           | <u>0.0010</u> | 0.06            | 0.77          | -0.69           | <u>0.0230</u> | Heat shock 70 kDa protein 12A                            | Q8K0U4     |
| Hspa12b  | -0.9831                          | 0.53            | 0.35          | -1.15           | <u>0.0003</u> | -0.04           | 0.91          | -0.63           | 0.47          | Heat shock 70 kDa protein 12B                            | Q9CZJ2     |
| Hspa1b   | -0.0070                          | 0.26            | <u>0.0250</u> | -0.04           | 0.38          | 0.10            | 0.96          | 0.22            | 0.28          | Heat shock 70 kDa protein 1B                             | P17879     |
| Hspa4    | -0.0027                          | -0.18           | 0.44          | 0.13            | 0.48          | 0.03            | 0.66          | -0.05           | 1             | Heat shock 70 kDa protein 4                              | Q3U2G2     |
| Hspa4l   | -0.0003                          | -0.07           | 0.54          | 0.05            | 0.5           | 0.09            | 0.62          | -0.03           | 0.96          | Heat shock 70 kDa protein 4L                             | P48722     |
| Hspa5    | 0.0352                           | 0.13            | 0.25          | 0.45            | 0.1           | 0.06            | 0.95          | 0.58            | <u>0.0008</u> | Endoplasmic reticulum chaperone BiP                      | P20029     |
| Hspa8    | 0.0005                           | 0.07            | 0.33          | 0.08            | 0.63          | -0.04           | 0.72          | 0.16            | 0.15          | Heat shock cognate 71 kDa protein                        | P63017     |
| Hspa9    | 0.0051                           | -0.12           | 0.38          | -0.14           | 0.19          | -0.02           | 0.68          | -0.25           | <u>0.0290</u> | Stress-70 protein, mitochondrial                         | P38647     |
| Hspb1    | -0.0139                          | 0.08            | 0.84          | -1.77           | 0.051         | -0.90           | 0.56          | -1.69           | <u>0.0280</u> | Heat shock protein beta-1                                | D3YZ06     |
| Hspd1    | -0.4295                          | 0.20            | <u>0.0300</u> | -0.47           | <u>0.0010</u> | -0.12           | 0.33          | -0.27           | 0.32          | 60 kDa heat shock protein, mitochondrial                 | P63038     |
| Hsph1    | -0.0001                          | -0.02           | 0.62          | 0.13            | 0.57          | 0.00            | 0.67          | 0.10            | 0.31          | Heat shock protein 105 kDa                               | E9Q0U7     |
| Htra2    | 0.7001                           | 1.00            | 0.45          | 1.30            | <u>0.0280</u> | 1.60            | <u>0.0490</u> | 2.31            | <u>0.0280</u> | Serine protease HTRA2, mitochondrial                     | Q9JIY5     |

Table S2: Differentially expressed proteins in cerebral cortex (*continued*)

| gene     | $\frac{\pi_{TW/EW} \times \pi_{TF/TW}}$ | log2FC<br>TW/EW | padj<br>TW/EW | log2FC<br>TF/TW | padj<br>TF/TW | log2FC<br>EF/EW | padj<br>EF/EW | log2FC<br>TF/EW | padj<br>TF/EW | description                                                      | accession  |
|----------|-----------------------------------------|-----------------|---------------|-----------------|---------------|-----------------|---------------|-----------------|---------------|------------------------------------------------------------------|------------|
| Htt      | -0.0019                                 | 0.10            | 0.91          | -0.91           | 0.31          | -0.80           | 0.37          | -0.81           | 0.31          | Huntingtin                                                       | G3X9H5     |
| Huwe1    | 0.0004                                  | -0.11           | 0.93          | -0.26           | 0.34          | 0.00            | 0.9           | -0.37           | 0.37          | HECT-type E3 ubiquitin transferase                               | A2AFQ0     |
| Hyou1    | -0.0035                                 | -0.13           | 0.25          | 0.11            | 0.39          | -0.01           | 0.71          | -0.02           | 0.7           | Hypoxia up-regulated protein 1                                   | Q9JKR6     |
| Iap      | 0.0000                                  | 0.28            | 0.96          | -0.68           | 0.98          | 0.09            | 0.79          | -0.40           | 0.16          | IgE-binding protein                                              | P03975     |
| Iars1    | -0.3731                                 | 1.05            | <u>0.0160</u> | -0.31           | 0.23          | 0.52            | 0.29          | 0.73            | 0.34          | Isoleucine-tRNA ligase, cytoplasmic                              | Q8BU30     |
| Iars2    | -0.0849                                 | 0.38            | 0.57          | -1.52           | 0.25          | -1.03           | 0.57          | -1.13           | 0.49          | Isoleucine-tRNA ligase, mitochondrial                            | Q8BIJ6     |
| Icam5    | -0.0027                                 | -0.21           | 0.31          | 0.05            | 0.31          | 0.18            | 1             | -0.16           | 0.1           | Intercellular adhesion molecule 5                                | Q60625     |
| Idh1     | 0.8646                                  | -0.43           | <u>0.0470</u> | -1.04           | <u>0.0350</u> | -0.53           | 0.16          | -1.47           | <u>0.0110</u> | Isocitrate dehydrogenase [NADP]<br>cytoplasmic                   | O88844     |
| Idh2     | -0.0021                                 | 0.09            | 0.68          | -0.47           | 0.5           | -0.70           | 0.18          | -0.37           | 0.81          | Isocitrate dehydrogenase [NADP],<br>mitochondrial                | P54071     |
| Idh3a    | -0.0079                                 | 0.06            | 0.47          | -0.29           | <u>0.0420</u> | -0.13           | 0.33          | -0.23           | 0.31          | Isocitrate dehydrogenase [NAD] subunit,<br>mitochondrial         | A0A1L1STE6 |
| Idh3b    | -3.5528                                 | 0.64            | <u>0.0008</u> | -0.50           | <u>0.0003</u> | 0.08            | 0.89          | 0.14            | 0.6           | Isocitrate dehydrogenase [NAD] subunit,<br>mitochondrial         | Q91VA7     |
| Idh3g    | -0.0049                                 | 0.08            | 0.69          | -0.29           | <u>0.0480</u> | -0.08           | 0.9           | -0.22           | 0.1           | Isocitrate dehydrogenase [NAD] subunit<br>gamma 1, mitochondrial | P70404     |
| Igdcc4   | -0.1690                                 | -0.89           | 0.098         | 0.36            | 0.3           | -1.74           | 0.15          | -0.52           | 0.44          | Immunoglobulin superfamily DCC<br>subclass member 4              | Q9EQS9     |
| Ighm     | 0.0031                                  | -0.56           | 0.76          | -0.11           | 0.38          | -0.35           | 0.54          | -0.68           | 0.2           | Immunoglobulin heavy constant mu<br>(Fragment)                   | A0A075B5P6 |
| Iglon5   | 3.9016                                  | -4.52           | 0.44          | -4.63           | 0.3           | -1.68           | 0.056         | -9.15           | <u>0.0280</u> | IgLON family member 5                                            | Q8HW98     |
| Igsf21   | -0.4110                                 | 0.58            | 0.1           | -0.86           | 0.15          | 0.56            | 0.41          | -0.28           | 0.98          | Immunoglobulin superfamily member 21                             | Q7TNR6     |
| Igsf8    | -0.0020                                 | -0.16           | 0.79          | 0.31            | 0.4           | 0.28            | 0.15          | 0.15            | 0.28          | Immunoglobulin superfamily member 8                              | Q8R366     |
| Igsf9b   | -0.7633                                 | 0.87            | 0.16          | -1.15           | 0.11          | -0.58           | 0.67          | -0.28           | 0.36          | Protein turtle homolog B                                         | A0A1L1SR84 |
| Ik       | -0.5857                                 | 1.31            | 0.31          | -1.46           | 0.25          | 0.23            | 0.48          | -0.15           | 0.47          | Protein Red                                                      | Q9Z1M8     |
| Il1rapl1 | -1.1915                                 | 3.29            | 0.74          | -4.60           | 0.25          | -1.24           | 0.57          | -1.31           | 0.52          | Interleukin-1 receptor accessory<br>protein-like 1               | B1ASU0     |
| Illdr2   | -0.0001                                 | 0.32            | 0.53          | -0.27           | 0.99          | 0.18            | 0.35          | 0.06            | 0.76          | Immunoglobulin-like domain-containing<br>receptor 2              | A0A0A6YVY9 |
| Ilf2     | -0.0043                                 | -0.20           | 0.73          | 0.44            | 0.44          | -4.17           | 0.059         | 0.24            | 0.61          | Interleukin enhancer-binding factor 2                            | Q9CXY6     |
| Ilf3     | -0.0301                                 | 0.50            | 0.65          | -0.52           | 0.24          | -0.55           | 0.083         | -0.02           | 0.32          | Interleukin enhancer-binding factor 3                            | A0A1L1STE4 |
| Ilk      | -1.5951                                 | 0.42            | 0.12          | -1.72           | <u>0.0040</u> | -0.97           | 0.072         | -1.30           | <u>0.0470</u> | Integrin-linked protein kinase (Fragment)                        | D3YZA5     |
| Immt     | -0.0005                                 | 0.51            | 0.5           | -0.13           | 0.94          | -0.04           | 0.7           | 0.38            | 0.48          | MICOS complex subunit Mic60                                      | Q8CAQ8     |
| Impa1    | 0.0000                                  | -0.26           | 0.83          | 0.12            | 0.97          | -0.54           | 0.35          | -0.14           | 0.83          | Inositol monophosphatase 1                                       | O55023     |
| Ina      | -48.6318                                | 1.80            | <u>0.0060</u> | -3.04           | <u>0.0001</u> | -0.50           | 0.09          | -1.24           | <u>0.0001</u> | Alpha-internexin                                                 | P46660     |
| Inpp4a   | 0.0008                                  | 0.20            | 0.1           | 0.06            | 0.86          | -0.04           | 0.7           | 0.26            | 0.36          | Phosphatidylinositol-3,4-bisphosphate<br>4-phosphatase           | D3YUL8     |
| Inpp5a   | 0.0000                                  | -0.04           | 0.96          | 0.47            | 1             | 0.31            | 0.51          | 0.43            | 0.49          | Inositol-polyphosphate 5-phosphatase                             | Q3TZT4     |

Table S2: Differentially expressed proteins in cerebral cortex (*continued*)

| gene    | $\pi_{TW/EW} \times \pi_{TF/TW}$ | log2FC<br>TW/EW | padj<br>TW/EW | log2FC<br>TF/TW | padj<br>TF/TW | log2FC<br>EF/EW | padj<br>EF/EW | log2FC<br>TF/EW | padj<br>TF/EW | description                                                      | accession  |
|---------|----------------------------------|-----------------|---------------|-----------------|---------------|-----------------|---------------|-----------------|---------------|------------------------------------------------------------------|------------|
| Inpp5j  | 0.0004                           | 0.15            | 0.43          | 0.07            | 0.8           | -0.21           | 0.26          | 0.22            | 0.66          | Phosphatidylinositol 4,5-bisphosphate 5-phosphatase A            | P59644     |
| Ipo7    | 0.0138                           | -0.34           | <u>0.0150</u> | -0.07           | 0.48          | -0.03           | 0.46          | -0.41           | 0.18          | Importin-7                                                       | Q9EPL8     |
| Iqgap2  | -15.3717                         | 4.24            | 0.38          | -9.00           | 0.11          | -4.68           | 0.17          | -4.76           | 0.077         | Ras GTPase-activating-like protein IQGAP2                        | Q3UQ44     |
| Iqsec1  | -77.0556                         | 4.09            | 0.1           | -6.28           | <u>0.0010</u> | 0.54            | 0.99          | -2.19           | 0.092         | IQ motif and SEC7 domain-containing protein 1                    | A0A1D5RM83 |
| Iqsec2  | -9.7040                          | 1.73            | 0.13          | -2.64           | <u>0.0040</u> | 0.19            | 0.9           | -0.91           | 0.066         | ARF6 guanine nucleotide exchange factor IQArfGEF                 | A4GZ26     |
| Iqsec3  | -0.0760                          | 0.72            | 0.74          | -1.38           | 0.26          | -0.09           | 0.81          | -0.65           | 0.28          | IQ motif and SEC7 domain-containing protein 3                    | Q3TES0     |
| Irgq    | -0.2074                          | -0.84           | 0.05          | 0.28            | 0.21          | -0.23           | 0.8           | -0.56           | 0.18          | Immunity-related GTPase family Q protein                         | Q8VIM9     |
| Isca2   | -1.8343                          | 1.50            | 0.36          | -2.45           | 0.075         | 1.22            | 0.23          | -0.94           | 0.32          | Iron-sulfur cluster assembly 2 homolog, mitochondrial (Fragment) | A0A1Y7VK19 |
| Ist1    | -0.0035                          | 0.11            | 0.26          | -0.09           | 0.25          | 0.05            | 0.54          | 0.02            | 0.91          | IST1 homolog                                                     | Q9CX00     |
| Isyna1  | 0.0000                           | -0.02           | 0.99          | -0.30           | 0.69          | -0.03           | 0.89          | -0.32           | 0.59          | Inositol-3-phosphate synthase 1                                  | Q9JHU9     |
| Itch    | -0.1890                          | 0.64            | 0.26          | -0.70           | 0.19          | 0.05            | 0.75          | -0.06           | 0.78          | E3 ubiquitin-protein ligase Itchy                                | Q8C863     |
| Itpka   | -0.5374                          | 1.17            | 0.23          | -1.23           | 0.26          | 0.98            | 0.37          | -0.06           | 0.95          | Inositol-trisphosphate 3-kinase A                                | Q8R071     |
| Itpr1   | 0.0039                           | 0.24            | 0.68          | 0.36            | 0.54          | -0.39           | 0.83          | 0.60            | 0.34          | Inositol 1,4,5-trisphosphate receptor type 1                     | P11881     |
| Itsn1   | 0.0006                           | 0.24            | <u>0.0008</u> | 0.20            | 0.99          | 0.30            | <u>0.0180</u> | 0.44            | <u>0.0001</u> | Intersectin-1                                                    | E9Q0N0     |
| Ivd     | 0.1457                           | -0.58           | 0.051         | -0.45           | 0.37          | -0.58           | 0.11          | -1.03           | <u>0.0010</u> | Isovaleryl-CoA dehydrogenase, mitochondrial                      | Q9JHI5     |
| Jak1    | -9.9356                          | 1.89            | 0.093         | -2.88           | <u>0.0170</u> | -1.14           | 0.42          | -1.00           | 0.45          | Tyrosine-protein kinase                                          | B1ASP2     |
| Jakmip2 | -0.0088                          | 0.43            | 0.61          | -0.43           | 0.6           | 0.07            | 0.94          | 0.00            | 1             | Janus kinase and microtubule-interacting protein 2               | D3YXK0     |
| Jam3    | -0.0371                          | -0.36           | 0.83          | 1.49            | 0.14          | 0.36            | 0.87          | 1.13            | 0.4           | Junctional adhesion molecule C                                   | Q9D8B7     |
| Jph4    | -0.0913                          | 0.69            | 0.64          | -1.07           | 0.23          | -0.82           | <u>0.0280</u> | -0.37           | 0.36          | Junctophilin-4                                                   | Q80WT0     |
| Jup     | 0.0023                           | -0.26           | 0.92          | -0.35           | 0.2           | -0.15           | 0.93          | -0.61           | 0.21          | Junction plakoglobin                                             | Q02257     |
| Kars    | -0.0800                          | -0.11           | 0.35          | 0.42            | <u>0.0002</u> | 0.07            | 0.41          | 0.30            | <u>0.0010</u> | Lysine-tRNA ligase                                               | Q8R2P8     |
| Kbtbd11 | -0.0002                          | -0.21           | 0.45          | 0.02            | 0.7           | 0.18            | 0.8           | -0.19           | 0.19          | Kelch repeat and BTB domain-containing protein 11                | Q8BNW9     |
| Kcna1   | 0.0375                           | 1.30            | 0.41          | 0.57            | 0.74          | 0.46            | 0.84          | 1.87            | 0.19          | Potassium voltage-gated channel subfamily A member 1             | P16388     |
| Kcnab2  | -0.1138                          | 0.28            | 0.13          | -0.38           | 0.062         | -0.36           | 0.17          | -0.09           | 0.6           | K(+) channel subunit beta-2                                      | A0A571BGH0 |
| Kcnb1   | -13.5061                         | 1.54            | <u>0.0450</u> | -2.83           | <u>0.0050</u> | 1.02            | 0.16          | -1.29           | 0.47          | Potassium voltage-gated channel subfamily B member 1             | Q03717     |
| Kcnd2   | -0.0776                          | 0.46            | 0.28          | -0.45           | 0.21          | 1.05            | 0.25          | 0.00            | 0.91          | Potassium voltage-gated channel subfamily D member 2             | Q9Z0V2     |

Table S2: Differentially expressed proteins in cerebral cortex (*continued*)

| gene     | $\pi_{TW/EW} \times \pi_{TF/TW}$ | log2FC<br>TW/EW | padj<br>TW/EW | log2FC<br>TF/TW | padj<br>TF/TW | log2FC<br>EF/EW | padj<br>EF/EW | log2FC<br>TF/EW | padj<br>TF/EW | description                                                                 | accession  |
|----------|----------------------------------|-----------------|---------------|-----------------|---------------|-----------------|---------------|-----------------|---------------|-----------------------------------------------------------------------------|------------|
| Kcnip4   | -0.0008                          | -0.12           | 0.92          | 0.61            | 0.49          | 1.98            | <u>0.0020</u> | 0.49            | 0.19          | Kv channel-interacting protein 4                                            | Q3UFC0     |
| Kcnq2    | -0.0001                          | -0.37           | 0.94          | 0.39            | 0.92          | 0.33            | 0.79          | 0.02            | 0.99          | Potassium voltage-gated channel subfamily KQT member 2                      | A0A0G2JFQ2 |
| Kcnq3    | -70.5264                         | 6.66            | 0.093         | -7.17           | <u>0.0370</u> | 1.70            | 0.4           | -0.52           | 0.82          | Potassium voltage-gated channel subfamily KQT member 3                      | Q8K3F6     |
| Kctd12   | -0.0413                          | -0.34           | <u>0.0140</u> | 0.14            | 0.34          | 0.15            | 0.16          | -0.20           | 0.12          | BTB/POZ domain-containing protein KCTD12                                    | A0A0R4J2B2 |
| Kctd16   | -0.0577                          | 0.39            | 0.19          | -0.53           | 0.41          | 0.16            | 0.81          | -0.14           | 0.85          | BTB/POZ domain-containing protein KCTD16                                    | Q5DTY9     |
| Kctd8    | 0.0023                           | -0.13           | 0.77          | -0.72           | 0.61          | 0.37            | 0.76          | -0.85           | 0.28          | BTB/POZ domain-containing protein KCTD8                                     | Q50H33     |
| Khdrbs1  | -0.1279                          | 0.75            | 0.18          | -0.56           | 0.39          | -0.17           | 0.64          | 0.19            | 0.38          | KH domain-containing, RNA-binding, signal transduction-associated protein 1 | Q60749     |
| Khdrbs3  | -0.2200                          | 0.63            | 0.19          | -0.65           | 0.18          | -0.12           | 0.72          | -0.02           | 0.98          | KH domain-containing, RNA-binding, signal transduction-associated protein 3 | Q9R226     |
| Khsrp    | -0.0835                          | -0.46           | 0.26          | 0.43            | 0.19          | -0.46           | 0.081         | -0.03           | 0.97          | Far upstream element-binding protein 2                                      | A0A3B2WCD8 |
| Kiaa1109 | 0.0180                           | -0.13           | 0.56          | -0.94           | 0.26          | -0.67           | 0.12          | -1.07           | 0.13          | Transmembrane protein KIAA1109                                              | A2AAE1     |
| Kif1a    | -0.0035                          | -0.08           | 0.67          | 0.34            | 0.18          | -0.07           | 0.97          | 0.26            | 0.27          | Kinesin-like protein KIF1A                                                  | A0A087WQE8 |
| Kif21a   | -6.3559                          | 2.07            | 0.11          | -2.20           | <u>0.0350</u> | 0.97            | 0.24          | -0.13           | 0.78          | Kinesin-like protein KIF21A                                                 | F8WGN6     |
| Kif21b   | 0.0043                           | -3.73           | 0.82          | -0.24           | 0.88          | -3.75           | 0.47          | -3.98           | 0.51          | Kinesin-like protein KIF21B                                                 | E9Q0A4     |
| Kif2a    | -2.3818                          | 0.71            | 0.29          | -1.56           | <u>0.0001</u> | -0.37           | 0.095         | -0.85           | <u>0.0007</u> | Kinesin-like protein                                                        | E0CZ72     |
| Kif3a    | -0.0020                          | 0.13            | 0.49          | -0.14           | 0.45          | -0.22           | 0.64          | -0.01           | 0.98          | Kinesin-like protein                                                        | B1AQZ2     |
| Kif5c    | -1.0853                          | 1.02            | <u>0.0010</u> | -0.37           | 0.11          | 0.16            | 0.63          | 0.65            | <u>0.0210</u> | Kinesin heavy chain isoform 5C                                              | P28738     |
| Klc1     | -0.1041                          | 0.53            | 0.17          | -0.40           | 0.23          | 0.07            | 0.99          | 0.13            | 0.94          | Kinesin light chain                                                         | Q7TNF4     |
| Klc2     | 0.0059                           | 0.19            | 0.18          | 0.06            | 0.2           | -0.50           | 0.08          | 0.25            | 0.82          | Kinesin light chain                                                         | D3YXZ3     |
| Kpnb1    | -0.0439                          | -0.35           | <u>0.0020</u> | 0.12            | 0.41          | -0.11           | 0.23          | -0.23           | <u>0.0120</u> | Importin subunit beta-1                                                     | P70168     |
| Kras     | 0.0011                           | -0.31           | 0.98          | -0.28           | <u>0.0380</u> | 0.07            | 0.5           | -0.59           | 0.98          | GTPase KRas                                                                 | P32883     |
| Ksr1     | -0.1664                          | -0.63           | 0.11          | 0.37            | 0.18          | 0.26            | 0.57          | -0.25           | 0.41          | Kinase suppressor of Ras 1                                                  | Q61097     |
| Ktn1     | 0.0004                           | -0.16           | 0.87          | -0.23           | 0.68          | -0.13           | 0.6           | -0.39           | 0.69          | Kinectin                                                                    | Q61595     |
| L1cam    | -0.0001                          | 0.08            | 0.31          | -0.08           | 0.93          | 0.48            | 0.17          | 0.00            | 0.34          | Neural cell adhesion molecule L1                                            | A2AFG7     |
| Lactb    | -1.0841                          | 0.52            | <u>0.0006</u> | -0.47           | <u>0.0420</u> | 0.40            | <u>0.0020</u> | 0.05            | 1             | Serine beta-lactamase-like protein LACTB, mitochondrial                     | Q9EP89     |
| Lamb2    | 0.0045                           | -0.18           | 0.83          | -0.51           | 0.25          | 0.25            | 0.57          | -0.69           | 0.49          | Laminin subunit beta-2                                                      | Q61292     |
| Lamc1    | -0.8249                          | 0.72            | 0.75          | -9.01           | 0.096         | 1.19            | 0.35          | -8.29           | 0.23          | Laminin subunit gamma-1                                                     | P02468     |
| Lamtor1  | -0.0118                          | 0.55            | 0.83          | -1.09           | 0.57          | -0.87           | 0.9           | -0.54           | 0.97          | Ragulator complex protein LAMTOR1                                           | Q9CQ22     |
| Lancl1   | -0.0315                          | -0.08           | 0.69          | 0.61            | <u>0.0001</u> | 0.33            | <u>0.0020</u> | 0.53            | <u>0.0002</u> | Glutathione S-transferase LANCL1                                            | O89112     |
| Lancl2   | 0.0000                           | -0.03           | 0.75          | 0.11            | 0.8           | 0.44            | 0.065         | 0.08            | 0.71          | LanC-like protein 2 (Fragment)                                              | F6RJV6     |
| Lap3     | -0.0002                          | 0.11            | 0.75          | -0.19           | 0.81          | 0.15            | 0.64          | -0.08           | 1             | Cytosol aminopeptidase                                                      | Q9CPY7     |
| Larp4b   | -0.6215                          | -0.80           | 0.079         | 0.62            | 0.073         | 0.16            | 0.75          | -0.18           | 0.5           | La-related protein 4B                                                       | Q6A0A2     |

Table S2: Differentially expressed proteins in cerebral cortex (*continued*)

| gene   | $\pi_{\text{TF}/\text{EW}} \times \pi_{\text{TF}/\text{TW}}$ | log2FC<br>TW/EW | padj<br>TW/EW | log2FC<br>TF/TW | padj<br>TF/TW | log2FC<br>EF/EW | padj<br>EF/EW | log2FC<br>TF/EW | padj<br>TF/EW | description                                                                                       | accession  |
|--------|--------------------------------------------------------------|-----------------|---------------|-----------------|---------------|-----------------|---------------|-----------------|---------------|---------------------------------------------------------------------------------------------------|------------|
| Larp6  | 0.0000                                                       | 0.83            | 0.46          | -0.14           | 1             | -0.37           | 0.98          | 0.68            | 0.91          | La-related protein 6                                                                              | Q8BN59     |
| Lars1  | 0.0000                                                       | -0.01           | 0.94          | 0.03            | 0.83          | -0.18           | 0.34          | 0.02            | 0.89          | Leucine-tRNA ligase, cytoplasmic                                                                  | Q8BMJ2     |
| Lars2  | 0.0376                                                       | 0.31            | 0.42          | 0.49            | 0.22          | -0.33           | 0.38          | 0.80            | 0.056         | Probable leucine-tRNA ligase, mitochondrial                                                       | Q8VDC0     |
| Lasp1  | -2.3290                                                      | 0.60            | 0.057         | -1.04           | <u>0.0010</u> | 0.04            | 0.93          | -0.44           | 0.22          | LIM and SH3 domain protein 1                                                                      | Q61792     |
| Ldha   | -0.0058                                                      | -0.52           | <u>0.0017</u> | 0.05            | 0.83          | -0.08           | 0.14          | -0.47           | <u>0.0001</u> | L-lactate dehydrogenase                                                                           | A0A1B0GSX0 |
| Ldhb   | -0.0451                                                      | -0.41           | <u>0.0003</u> | 0.06            | 0.31          | -0.20           | 0.19          | -0.35           | <u>0.0180</u> | L-lactate dehydrogenase                                                                           | A0A6I8MX27 |
| Lemd3  | -0.0005                                                      | -0.13           | 0.88          | 0.43            | 0.68          | 0.37            | 0.51          | 0.31            | 0.6           | Inner nuclear membrane protein Man1                                                               | D3YU56     |
| Letm1  | 0.0003                                                       | 0.54            | 0.2           | 0.19            | 0.99          | -0.02           | 0.77          | 0.73            | 0.07          | Mitochondrial proton/calcium exchanger protein                                                    | Q9Z2I0     |
| Letmd1 | -0.3994                                                      | 0.46            | 0.14          | -0.89           | 0.072         | 0.00            | 1             | -0.43           | 0.41          | LETM1 domain-containing protein 1                                                                 | Q924L1     |
| Lgals1 | 0.0885                                                       | 0.80            | 0.11          | 0.26            | 0.36          | -0.30           | 0.9           | 1.06            | <u>0.0016</u> | Galectin-1                                                                                        | P16045     |
| Lgals8 | 0.0000                                                       | 0.02            | 0.83          | -0.06           | 0.41          | 0.27            | 0.14          | -0.04           | 0.53          | Galectin                                                                                          | A8DIL0     |
| Lgi1   | 0.0011                                                       | 0.21            | 0.22          | 0.01            | 0.17          | 0.18            | 0.32          | 0.22            | 0.72          | Leucine-rich glioma-inactivated protein 1                                                         | A0A0G2JGE8 |
| Lgi2   | -0.0021                                                      | 0.13            | 0.62          | -0.20           | 0.41          | 0.30            | 0.26          | -0.07           | 0.67          | Leucine-rich repeat LGI family member 2                                                           | Q8K4Z0     |
| Lgi3   | -0.0867                                                      | 0.59            | 0.52          | -0.91           | 0.27          | 0.53            | 0.43          | -0.32           | 0.56          | Leucine-rich repeat LGI family member 3                                                           | Q8K406     |
| Lima1  | -2.1769                                                      | 4.72            | 0.13          | -3.23           | 0.69          | 5.62            | 0.088         | 1.49            | 0.26          | LIM domain and actin-binding protein 1                                                            | Q9ERG0     |
| Lin7a  | -0.0043                                                      | -0.20           | 0.86          | 0.44            | 0.18          | 0.06            | 0.98          | 0.24            | 0.37          | Protein lin-7 homolog A                                                                           | Q8JZS0     |
| Lin7b  | -0.0088                                                      | 0.08            | 0.38          | -0.21           | 0.057         | 0.08            | 0.97          | -0.13           | 0.6           | Protein lin-7 homolog B                                                                           | O88951     |
| Lingo1 | -0.0909                                                      | -0.31           | 0.51          | 0.70            | <u>0.0370</u> | -0.02           | 0.88          | 0.39            | 0.27          | Leucine-rich repeat and immunoglobulin-like domain-containing nogo receptor-interacting protein 1 | A9DA50     |
| Llgl1  | -0.0068                                                      | -0.29           | 0.45          | 0.27            | 0.56          | -0.39           | 0.41          | -0.02           | 0.75          | Lethal(2) giant larvae protein homolog 1                                                          | A0A0R4J0S4 |
| Lman1  | 0.0000                                                       | 0.02            | 1             | 0.11            | 0.56          | 0.16            | 0.55          | 0.13            | 0.66          | Protein ERGIC-53                                                                                  | Q9D0F3     |
| Lmna   | -0.0425                                                      | 0.14            | 0.8           | -1.22           | <u>0.0027</u> | -0.21           | 0.51          | -1.08           | <u>0.0018</u> | Prelamin-A/C                                                                                      | P48678     |
| Lmnb1  | -0.1343                                                      | 0.34            | 0.67          | -1.37           | <u>0.0220</u> | -0.36           | 0.34          | -1.02           | <u>0.0064</u> | Lamin-B1                                                                                          | P14733     |
| Lmnb2  | -3.6479                                                      | 1.01            | 0.33          | -3.26           | <u>0.0050</u> | 0.41            | 0.42          | -2.24           | <u>0.0330</u> | Lamin-B2                                                                                          | A0A0R4J0Q5 |
| Lmo7   | -0.1402                                                      | -0.79           | 0.14          | 0.42            | 0.32          | 0.31            | 0.59          | -0.37           | 0.17          | LIM domain only 7                                                                                 | E9PYF4     |
| Lmtk2  | 0.0002                                                       | -0.20           | 0.49          | -0.03           | 0.81          | 0.31            | 0.18          | -0.24           | 0.52          | Serine/threonine-protein kinase LMTK2                                                             | Q3TYD6     |
| Lmtk3  | -3.5248                                                      | 1.24            | 0.15          | -2.13           | <u>0.0240</u> | 0.48            | 0.4           | -0.89           | 0.41          | Serine/threonine-protein kinase LMTK3                                                             | A0A1B0GSR5 |
| Lonp1  | -0.0002                                                      | -0.04           | 0.95          | 0.51            | 0.46          | -0.67           | 0.89          | 0.47            | 0.28          | Lon protease homolog, mitochondrial                                                               | Q8CGK3     |
| Lrfn4  | -0.0058                                                      | 2.23            | 0.12          | -0.32           | 0.98          | 1.47            | 0.44          | 1.91            | 0.45          | Leucine-rich repeat and fibronectin type-III domain-containing protein 4                          | Q80XU8     |
| Lrfn5  | -17.1799                                                     | 5.92            | <u>0.0280</u> | -4.57           | 0.39          | 3.07            | 0.26          | 1.34            | 0.76          | Leucine-rich repeat and fibronectin type-III domain-containing protein 5                          | Q8BXA0     |
| Lrp1   | -0.0019                                                      | -0.02           | 0.48          | 0.44            | 0.21          | 0.15            | 0.4           | 0.41            | 0.068         | Prolow-density lipoprotein receptor-related protein 1                                             | A0A0R4J0I9 |
| Lrp1b  | -5.4040                                                      | 4.78            | 0.08          | -2.59           | 0.4           | 6.29            | 0.074         | 2.18            | 0.32          | Low-density lipoprotein receptor-related protein 1B                                               | A2API5     |

Table S2: Differentially expressed proteins in cerebral cortex (*continued*)

| gene   | $\pi_{TW/EW} \times \pi_{TF/TW}$ | log2FC<br>TW/EW | padj<br>TW/EW | log2FC<br>TF/TW | padj<br>TF/TW | log2FC<br>EF/EW | padj<br>EF/EW | log2FC<br>TF/EW | padj<br>TF/EW | description                                              | accession  |
|--------|----------------------------------|-----------------|---------------|-----------------|---------------|-----------------|---------------|-----------------|---------------|----------------------------------------------------------|------------|
| Lrpap1 | 0.0449                           | 0.08            | 0.65          | 0.75            | <u>0.0001</u> | 0.13            | 0.94          | 0.83            | <u>0.0006</u> | Alpha-2-macroglobulin receptor-associated protein        | P55302     |
| Lrpprc | -0.0028                          | 0.14            | 0.39          | -0.11           | 0.36          | -0.17           | 0.47          | 0.03            | 0.97          | Leucine-rich PPR motif-containing protein, mitochondrial | Q6PB66     |
| Lrrc40 | -0.0001                          | 0.04            | 0.79          | -0.07           | 0.63          | -0.25           | 0.39          | -0.04           | 0.85          | Leucine-rich repeat-containing protein 40                | Q9CRC8     |
| Lrrc47 | 0.0004                           | 0.12            | 0.39          | 0.23            | 0.92          | -0.33           | 0.42          | 0.35            | 0.41          | Leucine-rich repeat-containing protein 47                | E9PV22     |
| Lrrc4b | 0.0000                           | 0.06            | 0.88          | -0.10           | 0.84          | -0.53           | 0.25          | -0.04           | 0.81          | Leucine-rich repeat-containing protein 4B                | P0C192     |
| Lrrc4c | -0.0064                          | 0.46            | 0.36          | -0.11           | 0.52          | 0.43            | 0.4           | 0.35            | 0.56          | Leucine-rich repeat-containing protein 4C                | Q8C031     |
| Lrrc57 | -0.1721                          | -0.48           | <u>0.0004</u> | 0.15            | 0.2           | 0.03            | 0.54          | -0.32           | <u>0.0010</u> | Leucine rich repeat containing 57                        | Q8JZX5     |
| Lrrc59 | -2.6859                          | 0.82            | <u>0.0001</u> | -0.38           | <u>0.0070</u> | 0.24            | 0.8           | 0.45            | <u>0.069</u>  | Leucine-rich repeat-containing protein 59                | Q922Q8     |
| Lrrc7  | -5.5127                          | 1.44            | 0.24          | -2.54           | <u>0.0037</u> | -0.76           | <u>0.0410</u> | -1.10           | <u>0.0005</u> | Leucine-rich repeat-containing protein 7 (Fragment)      | A0A0G2JFZ5 |
| Lrrc73 | -0.6074                          | 0.32            | 0.33          | -1.41           | <u>0.0016</u> | -0.17           | 0.4           | -1.09           | <u>0.0005</u> | Gm88 protein                                             | B2RWC4     |
| Lrrc8a | -0.5715                          | 0.70            | 0.093         | -0.70           | 0.074         | -0.24           | 0.97          | 0.00            | 0.86          | Volume-regulated anion channel subunit LRRC8A            | Q80WG5     |
| Lrrc8c | -0.0014                          | 0.23            | 0.36          | -0.09           | 0.71          | -0.15           | 0.42          | 0.13            | 0.47          | Volume-regulated anion channel subunit LRRC8C            | Q8R502     |
| Lrrc8d | 0.0004                           | 0.06            | 0.7           | 0.15            | 0.56          | 0.33            | 0.22          | 0.22            | 0.35          | Volume-regulated anion channel subunit LRRC8D            | Q8BGR2     |
| Lrriq1 | -0.0027                          | 0.28            | <u>0.0270</u> | -0.05           | 0.75          | 0.00            | 0.98          | 0.23            | 0.19          | Leucine-rich repeat and IQ domain-containing protein 1   | Q0P5X1     |
| Lrrtm1 | -16.3379                         | 1.97            | <u>0.0230</u> | -2.20           | <u>0.0050</u> | -0.11           | 0.57          | -0.23           | 0.25          | Leucine-rich repeat transmembrane neuronal protein 1     | Q8K377     |
| Lrrtm4 | 0.0067                           | -0.33           | 0.77          | -0.58           | 0.49          | -0.66           | 0.19          | -0.90           | 0.05          | Leucine-rich repeat transmembrane neuronal protein 4     | A0A0R4J1T4 |
| Lsamp  | -0.0079                          | 0.23            | 0.93          | -0.81           | <u>0.0460</u> | -0.24           | 0.15          | -0.58           | <u>0.0020</u> | Limbic system-associated membrane protein                | Q8BLK3     |
| Lsm12  | 0.0003                           | -0.02           | 0.72          | -0.26           | 0.41          | 0.57            | 0.25          | -0.28           | 0.66          | Protein LSM12 homolog                                    | Q9D0R8     |
| Lsm14b | 0.0000                           | 0.07            | 0.64          | 0.00            | 1             | 0.06            | 0.31          | 0.07            | 0.53          | Protein LSM14 homolog B                                  | Q8BM41     |
| Lsm3   | -0.1282                          | -0.52           | 0.18          | 0.55            | 0.25          | -0.55           | 0.33          | 0.04            | 0.49          | U6 snRNA-associated Sm-like protein LSm3                 | P62311     |
| Lsm6   | -0.0029                          | -0.20           | 0.97          | 0.50            | <u>0.0070</u> | 0.01            | 0.91          | 0.30            | 0.35          | U6 snRNA-associated Sm-like protein LSm6                 | P62313     |
| Lsm7   | -0.1611                          | -0.41           | 0.19          | 0.54            | 0.098         | -0.33           | 0.22          | 0.14            | 0.67          | U6 snRNA-associated Sm-like protein LSm7                 | A0A1W2P6N1 |
| Lum    | 0.0101                           | 0.96            | 0.62          | 0.19            | 0.54          | 1.47            | 0.061         | 1.15            | 0.27          | Lumican                                                  | P51885     |
| Luzp1  | -0.0372                          | 0.50            | 0.15          | -0.24           | 0.42          | 0.17            | 0.97          | 0.26            | 0.35          | Leucine zipper protein 1                                 | Q8R4U7     |
| Ly6h   | 0.0000                           | -0.25           | 0.13          | 0.01            | 0.98          | -0.06           | 0.47          | -0.24           | 0.078         | Lymphocyte antigen 6 complex, locus H                    | Q8K356     |
| Lypla1 | -0.0067                          | 0.18            | 0.19          | -0.14           | 0.43          | 0.12            | 0.42          | 0.05            | 0.66          | Acyl-protein thioesterase 1                              | D3Z111     |



Table S2: Differentially expressed proteins in cerebral cortex (*continued*)

| gene      | $\pi_{TW/EW} \times \pi_{TF/TW}$ | log2FC<br>TW/EW | padj<br>TW/EW | log2FC<br>TF/TW | padj<br>TF/TW | log2FC<br>EF/EW | padj<br>EF/EW | log2FC<br>TF/EW | padj<br>TF/EW | description                                                                  | accession  |
|-----------|----------------------------------|-----------------|---------------|-----------------|---------------|-----------------|---------------|-----------------|---------------|------------------------------------------------------------------------------|------------|
| Lysmd1    | 0.0001                           | 0.09            | 0.86          | 0.16            | 0.88          | -0.76           | 0.44          | 0.25            | 0.91          | LysM and putative peptidoglycan-binding domain-containing protein 1          | Q9D0E3     |
| Lyz1      | -2.1148                          | -2.04           | <u>0.0280</u> | 0.53            | 0.055         | -0.91           | 0.29          | -1.51           | <u>0.0280</u> | Lysozyme C-1                                                                 | P17897     |
| Lzts1     | -28.6424                         | 2.21            | <u>0.0320</u> | -2.89           | <u>0.0010</u> | -0.07           | 0.88          | -0.68           | 0.12          | Leucine zipper putative tumor suppressor 1                                   | P60853     |
| Lzts3     | -0.0141                          | 0.44            | 0.95          | -2.12           | 0.21          | -0.06           | 0.97          | -1.68           | 0.23          | Leucine zipper putative tumor suppressor 3                                   | A2AHG0     |
| Macroh2a1 | -0.5292                          | 1.01            | 0.34          | -1.60           | 0.2           | -0.11           | 0.94          | -0.59           | 0.53          | Core histone macro-H2A.1                                                     | Q9QZQ8     |
| Macroh2a2 | -4.7109                          | 0.88            | <u>0.0290</u> | -1.38           | <u>0.0030</u> | -0.13           | 0.75          | -0.49           | 0.17          | Core histone macro-H2A.2                                                     | Q8CCK0     |
| Madd      | -0.0037                          | 0.13            | 0.33          | -0.15           | 0.4           | -0.05           | 0.61          | -0.02           | 0.91          | MAP kinase-activating death domain protein                                   | A0A0R4J1F4 |
| Mag       | -0.0001                          | -0.08           | 0.6           | 0.05            | 0.82          | 0.19            | 0.58          | -0.04           | 0.83          | Myelin-associated glycoprotein                                               | P20917     |
| Magi2     | -1.7365                          | 0.43            | 0.44          | -9.27           | 0.06          | -1.09           | 0.39          | -8.84           | 0.055         | Membrane-associated guanylate kinase, WW and PDZ domain-containing protein 2 | A0A0G2JE00 |
| Magi3     | -0.1430                          | 0.82            | 0.58          | -1.41           | 0.3           | -1.37           | 0.32          | -0.59           | 0.55          | Membrane-associated guanylate kinase inverted 3                              | G5E8T6     |
| Maip1     | 0.1683                           | -3.97           | 0.25          | -0.93           | 0.84          | -3.94           | 0.8           | -4.90           | 0.24          | m-AAA protease-interacting protein 1, mitochondrial                          | Q8BHE8     |
| Man2b1    | 0.0015                           | 0.46            | 0.75          | 0.27            | 0.8           | 0.69            | 0.5           | 0.73            | 0.62          | Lysosomal alpha-mannosidase                                                  | O09159     |
| Manf      | 0.0116                           | -0.14           | 0.56          | -0.53           | 0.24          | 0.36            | 0.17          | -0.67           | 0.11          | Mesencephalic astrocyte-derived neurotrophic factor                          | Q3TMX5     |
| Maoa      | -0.9085                          | 0.85            | <u>0.0270</u> | -0.74           | 0.12          | 0.67            | 0.16          | 0.11            | 0.47          | Amine oxidase [flavin-containing] A                                          | Q64133     |
| Maob      | 0.0003                           | 0.05            | 0.76          | 0.15            | 0.41          | 0.11            | 0.76          | 0.21            | 0.14          | Amine oxidase [flavin-containing] B                                          | Q8BW75     |
| Map1a     | -0.3692                          | 0.32            | <u>0.0005</u> | -0.19           | <u>0.0140</u> | 0.03            | <u>0.0180</u> | 0.13            | <u>0.0220</u> | Microtubule-associated protein 1A                                            | A2ARP8     |
| Map1b     | -0.4224                          | 0.35            | 0.1           | -0.56           | <u>0.0070</u> | -0.11           | 0.49          | -0.21           | 0.28          | Microtubule-associated protein 1B                                            | P14873     |
| Map1lc3b  | -0.0002                          | -0.03           | 0.95          | 0.49            | 0.23          | 0.54            | 0.11          | 0.46            | 0.22          | Microtubule-associated proteins 1A/1B light chain 3B                         | Q9CQV6     |
| Map1s     | -0.1386                          | 0.52            | 0.11          | -0.61           | 0.35          | 0.12            | 0.13          | -0.09           | 0.87          | Microtubule-associated protein 1S                                            | Q8C052     |
| Map2      | -0.0875                          | 0.42            | <u>0.0280</u> | -0.14           | 0.11          | 0.01            | 0.63          | 0.28            | 0.62          | Microtubule-associated protein                                               | A0A668KLC6 |
| Map2k1    | 0.0008                           | -0.06           | 0.28          | -0.06           | 0.38          | -0.13           | <u>0.0390</u> | -0.12           | 0.082         | Dual specificity mitogen-activated protein kinase kinase 1                   | P31938     |
| Map2k4    | 0.0000                           | -0.04           | 0.95          | -0.07           | 0.91          | -0.26           | 0.68          | -0.11           | 0.87          | Dual specificity mitogen-activated protein kinase kinase 4                   | P47809     |
| Map2k6    | -1.1151                          | 0.78            | 0.28          | -2.04           | 0.054         | -0.29           | 0.69          | -1.26           | 0.11          | Dual specificity mitogen-activated protein kinase kinase 6                   | P70236     |
| Map4      | -0.0006                          | 0.11            | 0.62          | -0.12           | 0.6           | -0.11           | 0.67          | 0.00            | 1             | Microtubule-associated protein                                               | A0A0G2JDN7 |
| Map4k3    | 0.0000                           | 0.17            | 0.95          | -0.07           | 0.97          | 0.18            | 0.62          | 0.10            | 0.88          | Mitogen-activated protein kinase kinase kinase kinase 3                      | A0A3Q4EGQ9 |

Table S2: Differentially expressed proteins in cerebral cortex (*continued*)

| gene     | $\pi_{TW/EW} \times \pi_{TF/TW}$ | log2FC<br>TW/EW | padj<br>TW/EW | log2FC<br>TF/TW | padj<br>TF/TW | log2FC<br>EF/EW | padj<br>EF/EW | log2FC<br>TF/EW | padj<br>TF/EW | description                                                             | accession  |
|----------|----------------------------------|-----------------|---------------|-----------------|---------------|-----------------|---------------|-----------------|---------------|-------------------------------------------------------------------------|------------|
| Map4k5   | -45.6741                         | 7.11            | 0.16          | -8.42           | 0.11          | 3.81            | 0.31          | -1.30           | 0.5           | Mitogen-activated protein kinase kinase kinase 5                        | E9Q1T3     |
| Map6     | -1.2421                          | 0.82            | <u>0.0004</u> | -0.36           | 0.06          | 0.21            | 0.86          | 0.46            | 0.26          | Microtubule-associated protein 6                                        | Q7TSJ2     |
| Map6d1   | -0.7202                          | 0.44            | 0.12          | -0.80           | <u>0.0060</u> | -0.17           | 0.2           | -0.36           | <u>0.0010</u> | MAP6 domain-containing protein 1                                        | Q14BB9     |
| Map7     | -0.0048                          | 0.04            | 0.69          | -0.59           | 0.056         | 0.26            | 0.26          | -0.55           | <u>0.0450</u> | Ensconsin                                                               | D3YWN7     |
| Map7d1   | -0.0771                          | 0.32            | 0.58          | -0.74           | <u>0.0420</u> | 0.41            | 0.75          | -0.42           | 0.34          | MAP7 domain-containing protein 1                                        | A2AJI0     |
| Map7d2   | 0.0001                           | 0.12            | 0.46          | 0.13            | 0.94          | -0.04           | 0.27          | 0.25            | 0.36          | MAP7 domain-containing protein 2                                        | A2AG50     |
| Mapk1    | -0.0085                          | -0.07           | 0.7           | 0.40            | <u>0.0110</u> | -0.27           | 0.064         | 0.32            | <u>0.0090</u> | Mitogen-activated protein kinase 1                                      | P63085     |
| Mapk10   | 0.0000                           | 0.04            | 1             | -0.71           | 0.33          | -0.33           | 0.6           | -0.67           | 0.25          | Mitogen-activated protein kinase                                        | A0A5F8MP75 |
| Mapk3    | -0.0148                          | -0.30           | 0.5           | 0.46            | 0.44          | -0.19           | 0.7           | 0.16            | 0.85          | Mitogen-activated protein kinase 3                                      | Q63844     |
| Mapk8ip3 | -0.0048                          | 0.33            | 0.18          | -0.12           | 0.69          | 0.20            | 0.52          | 0.21            | 0.45          | C-Jun-amino-terminal kinase-interacting protein 3                       | E9Q6B6     |
| Mapre2   | -0.3639                          | 1.12            | <u>0.0380</u> | -0.38           | 0.25          | -0.33           | 0.75          | 0.73            | 0.11          | Microtubule-associated protein RP/EB family member 2 (Fragment)         | D3YYK8     |
| Mapre3   | 0.0292                           | 0.38            | 0.17          | 0.28            | 0.44          | 0.08            | 0.74          | 0.66            | <u>0.0310</u> | Microtubule-associated protein RP/EB family member 3                    | Q6PER3     |
| Mapt     | -0.0079                          | 0.17            | 0.11          | -0.09           | 0.29          | 0.14            | 0.41          | 0.08            | 0.34          | Microtubule-associated protein                                          | A0A0A0MQC7 |
| Marcks   | 0.0005                           | -0.04           | 0.77          | -0.17           | 0.26          | 0.08            | 0.88          | -0.21           | 0.31          | Myristoylated alanine-rich C-kinase substrate                           | P26645     |
| Mark2    | -0.8489                          | 0.92            | <u>0.0460</u> | -0.69           | 0.1           | -0.04           | 0.96          | 0.24            | 0.47          | Non-specific serine/threonine protein kinase                            | A0A0R4J0B1 |
| Mark3    | -0.0060                          | 0.89            | 0.97          | -1.55           | 0.47          | -0.44           | 0.37          | -0.66           | 0.21          | Non-specific serine/threonine protein kinase                            | A0A1Y7VNZ6 |
| Mars1    | 0.0000                           | 0.47            | <u>0.0120</u> | 0.22            | 1             | 0.40            | 0.071         | 0.69            | 0.22          | Methionine-tRNA ligase, cytoplasmic                                     | Q68FL6     |
| Mast1    | -3.3661                          | 2.43            | 0.44          | -4.55           | 0.14          | 2.60            | 0.39          | -2.12           | 0.28          | Microtubule-associated serine/threonine-protein kinase 1                | Q9R1L5     |
| Mat2a    | -0.0865                          | 0.44            | 0.75          | -1.91           | 0.15          | 0.27            | 0.96          | -1.47           | 0.15          | S-adenosylmethionine synthase                                           | A0A0U1RKN6 |
| Matn4    | -0.0258                          | -0.95           | <u>0.0001</u> | 0.07            | 0.8           | -0.23           | 0.059         | -0.87           | <u>0.0001</u> | Matrilin-4                                                              | F2Z3U4     |
| Matr3    | -0.1564                          | 0.29            | 0.14          | -0.52           | 0.061         | -0.91           | <u>0.0020</u> | -0.23           | 0.48          | Matrin-3                                                                | Q8K310     |
| Mb21d2   | -0.2364                          | -0.29           | 0.15          | 0.43            | <u>0.0050</u> | 0.36            | 0.098         | 0.15            | 0.3           | Protein MB21D2                                                          | D3Z742     |
| Mblac2   | -9.3934                          | 4.93            | 0.11          | -4.73           | 0.38          | 5.36            | 0.055         | 0.20            | 0.76          | Metallo-beta-lactamase domain-containing protein 2                      | Q8BL86     |
| Mbp      | 0.0083                           | -0.20           | 0.82          | -1.00           | 0.33          | -0.57           | 0.16          | -1.20           | <u>0.0280</u> | Myelin basic protein                                                    | A0A498WGS3 |
| Mcat     | -0.6904                          | -1.01           | 0.087         | 0.70            | 0.12          | 0.23            | 0.57          | -0.31           | 0.23          | Malonyl-CoA-acyl carrier protein transacylase, mitochondrial (Fragment) | A0A2R8VHT7 |
| Mccc1    | 0.0020                           | 0.05            | 0.87          | 0.82            | 0.15          | -0.12           | 0.65          | 0.86            | <u>0.0360</u> | Methylcrotonoyl-CoA carboxylase subunit alpha, mitochondrial            | Q99MR8     |
| Mccc2    | 0.0132                           | 0.13            | 0.45          | 0.66            | 0.36          | 0.13            | 0.27          | 0.79            | 0.074         | Methylcrotonoyl-CoA carboxylase beta chain, mitochondrial               | Q3ULD5     |

Table S2: Differentially expressed proteins in cerebral cortex (*continued*)

| gene   | $\pi_{TW/EW} \times \pi_{TF/TW}$ | log2FC<br>TW/EW | padj<br>TW/EW | log2FC<br>TF/TW | padj<br>TF/TW | log2FC<br>EF/EW | padj<br>EF/EW | log2FC<br>TF/EW | padj<br>TF/EW | description                                                         | accession  |
|--------|----------------------------------|-----------------|---------------|-----------------|---------------|-----------------|---------------|-----------------|---------------|---------------------------------------------------------------------|------------|
| Mcee   | -0.0057                          | 0.02            | 0.65          | -0.86           | <u>0.0170</u> | 0.15            | 0.6           | -0.84           | <u>0.0140</u> | Methylmalonyl-CoA epimerase, mitochondrial                          | A0A0U1RQ27 |
| Mcts1  | 0.0061                           | -0.22           | 0.44          | -0.19           | 0.39          | 0.05            | 0.74          | -0.40           | <u>0.0180</u> | Malignant T-cell-amplified sequence 1                               | Q9DB27     |
| Mcu    | 0.0308                           | 0.45            | 0.43          | 0.47            | 0.4           | 0.36            | 0.9           | 0.92            | 0.14          | Calcium uniporter protein, mitochondrial                            | Q3UMR5     |
| Mdga2  | 0.0000                           | -0.39           | 0.26          | -0.01           | 1             | 0.10            | 0.71          | -0.41           | 0.07          | MAM domain-containing glycosylphosphatidylinositol anchor protein 2 | Q3UV20     |
| Mdh1   | 0.0007                           | -0.35           | <u>0.0028</u> | -0.06           | 0.97          | -0.27           | <u>0.0190</u> | -0.40           | <u>0.0005</u> | Malate dehydrogenase, cytoplasmic                                   | P14152     |
| Mdh2   | -0.0417                          | 0.04            | 0.38          | -0.62           | <u>0.0001</u> | -0.07           | 0.16          | -0.58           | <u>0.0006</u> | Malate dehydrogenase, mitochondrial                                 | P08249     |
| Mdn1   | -0.0083                          | 1.29            | 0.44          | -0.50           | 0.92          | -0.70           | 0.66          | 0.79            | 0.41          | Midasin                                                             | J3QMC5     |
| Me1    | -0.0011                          | -0.01           | 0.36          | 0.40            | 0.25          | 0.36            | 0.33          | 0.39            | 0.19          | Malic enzyme                                                        | Q3TQP6     |
| Me2    | 0.0487                           | 0.61            | 0.52          | 0.60            | 0.34          | 0.67            | 0.47          | 1.21            | <u>0.0190</u> | NAD-dependent malic enzyme, mitochondrial                           | Q99KE1     |
| Me3    | -0.0227                          | -0.34           | 0.94          | 0.83            | <u>0.0010</u> | -0.29           | 0.85          | 0.49            | <u>0.0360</u> | NADP-dependent malic enzyme, mitochondrial                          | Q8BMF3     |
| Mecp2  | -0.8042                          | 2.22            | 0.35          | -1.84           | 0.37          | 0.69            | 0.56          | 0.38            | 0.74          | Methyl-CpG-binding protein 2                                        | Q9Z2D6     |
| Mecr   | 0.0172                           | 0.22            | 0.49          | 0.42            | 0.25          | 0.28            | 0.12          | 0.64            | <u>0.0280</u> | Enoyl-[acyl-carrier-protein] reductase, mitochondrial               | Q9DCS3     |
| Mef2d  | -0.0457                          | 1.27            | 0.34          | -0.37           | 0.62          | 0.32            | 0.96          | 0.90            | 0.61          | Myocyte-specific enhancer factor 2D                                 | E9Q5E0     |
| Metap1 | 0.0560                           | 0.57            | 0.63          | 0.49            | 0.1           | 0.02            | 0.79          | 1.06            | 0.055         | Methionine aminopeptidase 1                                         | Q8BP48     |
| Metap2 | -0.0019                          | -0.02           | 0.44          | 0.21            | 0.058         | 0.03            | 0.95          | 0.20            | <u>0.0100</u> | Methionine aminopeptidase 2                                         | O08663     |
| Mfge8  | -3.8005                          | -0.58           | <u>0.0004</u> | 0.55            | <u>0.0003</u> | 0.49            | <u>0.0003</u> | -0.03           | 0.79          | Lactadherin                                                         | P21956     |
| Mia2   | 0.0486                           | 0.19            | 0.26          | 0.42            | 0.091         | 0.13            | 0.52          | 0.61            | <u>0.0110</u> | Melanoma inhibitory activity protein 2                              | A0A1W2P711 |
| Mia3   | 0.0013                           | 0.63            | 0.25          | 0.11            | 0.93          | -0.37           | 0.93          | 0.74            | 0.51          | Transport and Golgi organization protein 1 homolog                  | Q8BI84     |
| Mib2   | -0.1705                          | 0.53            | 0.73          | -1.88           | 0.056         | -0.77           | 0.31          | -1.35           | 0.058         | E3 ubiquitin-protein ligase MIB2                                    | Q8R516     |
| Mical3 | -0.6771                          | 1.28            | <u>0.0270</u> | -0.76           | 0.36          | 0.52            | 0.35          | 0.52            | 0.13          | F-actin monooxygenase                                               | A0A5F8MPF3 |
| Micu1  | -1.2603                          | 1.07            | <u>0.0007</u> | -0.47           | 0.16          | 0.28            | 0.3           | 0.59            | 0.59          | Calcium uptake protein 1, mitochondrial                             | Q8VCX5     |
| Micu3  | -0.0863                          | 0.90            | 0.051         | -0.15           | 0.32          | -0.05           | 0.72          | 0.76            | 0.35          | Calcium uptake protein 3, mitochondrial                             | Q9CTY5     |
| Mink1  | -6.4775                          | 1.04            | <u>0.0010</u> | -1.06           | <u>0.0110</u> | 0.39            | 0.12          | -0.02           | 0.85          | Misshapen-like kinase 1                                             | G3X9G2     |
| Mios   | 0.0003                           | 0.36            | 0.71          | 0.41            | 0.97          | 0.14            | 0.63          | 0.77            | 0.79          | GATOR complex protein MIOS                                          | Q8VE19     |
| Mipep  | -0.0025                          | 0.32            | 0.26          | -0.13           | 0.79          | -0.69           | 0.87          | 0.20            | 0.25          | Mitochondrial intermediate peptidase                                | A0A286YDC5 |
| Mlec   | 0.0343                           | 0.34            | 0.65          | 0.82            | 0.22          | 1.09            | <u>0.0070</u> | 1.16            | 0.1           | Malectin                                                            | Q6ZQI3     |
| Mlf2   | -0.1996                          | 0.26            | 0.45          | -1.13           | <u>0.0110</u> | 0.23            | 0.31          | -0.87           | <u>0.0047</u> | Myeloid leukemia factor 2                                           | Q99KX1     |
| Mlycd  | -0.0556                          | -0.43           | 0.12          | 0.22            | 0.23          | -0.04           | 0.91          | -0.21           | 0.32          | Malonyl-CoA decarboxylase, mitochondrial                            | Q99J39     |
| Mmaa   | -0.1384                          | 0.38            | 0.14          | -0.23           | <u>0.0140</u> | -0.02           | 0.96          | 0.15            | 0.55          | Methylmalonic aciduria type A homolog, mitochondrial                | Q8C7H1     |
| Mmab   | -0.0156                          | 0.29            | 0.34          | -0.28           | 0.39          | 0.05            | 0.85          | 0.02            | 0.87          | Corrinoid adenosyltransferase                                       | Q9D273     |

Table S2: Differentially expressed proteins in cerebral cortex (*continued*)

| gene   | $\pi_{TW/EW} \times \pi_{TF/TW}$ | log2FC<br>TW/EW | padj<br>TW/EW | log2FC<br>TF/TW | padj<br>TF/TW | log2FC<br>EF/EW | padj<br>EF/EW | log2FC<br>TF/EW | padj<br>TF/EW | description                                         | accession  |
|--------|----------------------------------|-----------------|---------------|-----------------|---------------|-----------------|---------------|-----------------|---------------|-----------------------------------------------------|------------|
| Mmut   | 0.0011                           | -0.04           | 0.85          | -0.49           | 0.15          | -0.81           | 0.069         | -0.53           | 0.062         | Methylmalonyl-CoA mutase, mitochondrial             | P16332     |
| Mobp   | -3.3975                          | 2.35            | 0.5           | -5.01           | 0.11          | 0.01            | 0.76          | -2.66           | 0.42          | Myelin-associated oligodendrocyte basic protein     | Q9D2P8     |
| Mog    | -0.0001                          | -0.37           | 0.87          | 0.11            | 0.92          | -0.27           | <u>0.0120</u> | -0.26           | <u>0.0010</u> | Myelin-oligodendrocyte glycoprotein                 | Q29ZQ5     |
| Mogs   | -0.0430                          | 0.36            | 0.31          | -0.39           | 0.25          | 0.01            | 0.63          | -0.03           | 0.71          | Mannosyl-oligosaccharide glucosidase                | Q80UM7     |
| Mon2   | 0.1603                           | -0.32           | 0.67          | -6.67           | 0.37          | 0.24            | 0.49          | -6.99           | 0.19          | Protein MON2 homolog                                | B9EKJ3     |
| Mpc1   | -0.0003                          | -0.08           | 0.85          | 0.18            | 0.54          | 0.37            | 0.18          | 0.10            | 0.65          | Mitochondrial pyruvate carrier 1                    | P63030     |
| Mpdz   | -0.0099                          | 0.26            | 0.54          | -0.40           | 0.44          | -0.13           | 0.69          | -0.14           | 0.67          | Mpdz protein                                        | B2RQR2     |
| Mpp1   | 2.7978                           | -1.40           | 0.075         | -1.30           | <u>0.0430</u> | -0.69           | 0.36          | -2.69           | <u>0.0020</u> | 55 kDa erythrocyte membrane protein                 | A2AN84     |
| Mpp2   | -0.0001                          | -0.21           | 0.76          | 0.20            | 0.94          | -0.12           | 0.31          | -0.02           | 0.74          | MAGUK p55 subfamily member 2                        | Q9WV34     |
| Mpp3   | 0.0000                           | 0.34            | 0.094         | 0.28            | 1             | 0.40            | 0.082         | 0.62            | <u>0.0010</u> | MAGUK p55 subfamily member 3                        | Q6XE40     |
| Mpp6   | 0.0000                           | -0.02           | 0.91          | -0.07           | 0.45          | -0.03           | 0.61          | -0.09           | 0.43          | MAGUK p55 subfamily member 6                        | Q9JLB0     |
| Mprip  | -9.1973                          | 2.12            | 0.1           | -3.03           | <u>0.0370</u> | 0.20            | 0.75          | -0.91           | 0.34          | Myosin phosphatase Rho-interacting protein          | Q5SWZ5     |
| Mpst   | -0.0066                          | -0.38           | 0.66          | 0.35            | 0.53          | -0.62           | 0.38          | -0.03           | 0.72          | 3-mercaptopyruvate sulfurtransferase                | Q99J99     |
| Mras   | -0.0311                          | 0.28            | 0.18          | -0.22           | 0.21          | -0.08           | 0.77          | 0.06            | 0.79          | Ras-related protein M-Ras                           | O08989     |
| Mrpl1  | -1.5951                          | 1.78            | <u>0.0440</u> | -0.83           | 0.16          | 1.86            | 0.07          | 0.95            | 0.56          | 39S ribosomal protein L1, mitochondrial             | Q99N96     |
| Mrpl11 | -0.2642                          | 0.92            | <u>0.0110</u> | -0.46           | 0.48          | 0.01            | 0.47          | 0.46            | 0.37          | 39S ribosomal protein L11, mitochondrial (Fragment) | A0A494B9H5 |
| Mrpl12 | -0.0038                          | 0.35            | 0.54          | -0.27           | 0.71          | 0.27            | 0.31          | 0.09            | 0.8           | 39S ribosomal protein L12, mitochondrial            | Q9DB15     |
| Mrpl19 | 0.0001                           | -0.17           | 0.84          | -0.09           | 0.83          | -0.64           | 0.71          | -0.26           | 0.63          | 39S ribosomal protein L19, mitochondrial            | Q9D338     |
| Mrpl2  | -0.4075                          | 0.41            | 0.1           | -0.64           | <u>0.0280</u> | -0.17           | 0.51          | -0.23           | <u>0.0280</u> | 39S ribosomal protein L2, mitochondrial             | B1B1D8     |
| Mrpl27 | 0.0046                           | 0.26            | 0.18          | 0.10            | 0.58          | 0.31            | 0.45          | 0.36            | 0.089         | 39S ribosomal protein L27, mitochondrial            | Q99N92     |
| Mrpl37 | -0.0760                          | 0.43            | 0.17          | -0.36           | 0.23          | -0.21           | 0.78          | 0.07            | 0.96          | 39S ribosomal protein L37, mitochondrial            | Q921S7     |
| Mrpl39 | 0.0000                           | 0.19            | 0.94          | -0.20           | 0.98          | -0.21           | 0.97          | -0.01           | 0.89          | 39S ribosomal protein L39, mitochondrial            | Q9JKF7     |
| Mrpl43 | -0.6108                          | 0.72            | <u>0.0100</u> | -0.40           | 0.087         | -0.39           | 0.47          | 0.33            | 0.23          | 39S ribosomal protein L43, mitochondrial            | Q5RL20     |
| Mrpl45 | -0.0036                          | 0.10            | 0.56          | -0.31           | 0.35          | 0.16            | 0.81          | -0.21           | 0.52          | 39S ribosomal protein L45, mitochondrial            | Q9D0Q7     |
| Mrpl53 | -0.0872                          | 0.85            | 0.26          | -0.55           | 0.48          | 0.43            | 0.58          | 0.29            | 0.7           | 39S ribosomal protein L53, mitochondrial            | Q9D1H8     |
| Mrps28 | -0.0748                          | 0.52            | 0.43          | -0.69           | 0.27          | 1.26            | 0.2           | -0.18           | 0.8           | 28S ribosomal protein S28, mitochondrial            | Q9CY16     |
| Mrps36 | -0.0071                          | 0.18            | 0.18          | -0.05           | 0.086         | -0.31           | 0.48          | 0.14            | 0.99          | 28S ribosomal protein S36, mitochondrial            | Q9CQX8     |
| Mrrf   | -0.0262                          | 0.62            | 0.23          | -0.28           | 0.58          | 0.33            | 0.99          | 0.35            | 0.79          | Ribosome-recycling factor, mitochondrial            | Q9D6S7     |
| Mrtfa  | -0.0174                          | 0.22            | 0.5           | -0.40           | 0.22          | 0.34            | 0.31          | -0.19           | 0.35          | Myocardin-related transcription factor A            | A0A5F8MQ33 |
| Msn    | -0.0162                          | -0.11           | 0.56          | 0.34            | <u>0.0190</u> | 0.42            | <u>0.0060</u> | 0.23            | 0.11          | Moesin                                              | P26041     |
| Msrb2  | -0.4210                          | 0.60            | <u>0.0440</u> | -0.37           | <u>0.0400</u> | 0.34            | 0.52          | 0.23            | 0.72          | Methionine-R-sulfoxide reductase B2, mitochondrial  | Q78J03     |
| Mtarc2 | -0.0008                          | 0.09            | 0.13          | -0.03           | 0.47          | -0.14           | 0.17          | 0.06            | 0.97          | Mitochondrial amidoxime reducing component 2        | Q922Q1     |

Table S2: Differentially expressed proteins in cerebral cortex (*continued*)

| gene    | $\pi_{TW/EW} \times \pi_{TF/TW}$ | log2FC<br>TW/EW | padj<br>TW/EW | log2FC<br>TF/TW | padj<br>TF/TW | log2FC<br>EF/EW | padj<br>EF/EW | log2FC<br>TF/EW | padj<br>TF/EW | description                                                 | accession  |
|---------|----------------------------------|-----------------|---------------|-----------------|---------------|-----------------|---------------|-----------------|---------------|-------------------------------------------------------------|------------|
| Mtatp8  | -0.0003                          | 0.01            | 0.75          | -0.32           | 0.17          | 0.11            | 0.91          | -0.31           | 0.096         | ATP synthase protein 8                                      | P03930     |
| Mtch1   | -0.0331                          | 0.90            | 0.44          | -0.48           | 0.61          | 1.47            | <u>0.0320</u> | 0.42            | 0.62          | Mitochondrial carrier homolog 1                             | Q791T5     |
| Mtch2   | -0.0006                          | 0.22            | 0.54          | -0.04           | 0.53          | 0.17            | 0.82          | 0.18            | 0.98          | Mitochondrial carrier homolog 2                             | A2AFW6     |
| Mtco2   | -0.7628                          | 0.92            | 0.17          | -1.17           | 0.12          | 1.03            | 0.095         | -0.25           | 0.83          | Cytochrome c oxidase subunit 2                              | P00405     |
| Mtdh    | 1.1084                           | 3.77            | 0.47          | 3.79            | 0.58          | 3.86            | 0.41          | 7.56            | 0.22          | Protein LYRIC                                               | Q80WJ7     |
| Mtfr1l  | -0.0652                          | 0.48            | 0.64          | -0.91           | 0.17          | -0.12           | 0.75          | -0.43           | 0.4           | Mitochondrial fission regulator 1-like                      | Q9CWE0     |
| Mthfd1  | 0.0028                           | -0.23           | 0.65          | -0.07           | 0.12          | 0.15            | 0.69          | -0.30           | 0.061         | C-1-tetrahydrofolate synthase, cytoplasmic                  | Q922D8     |
| Mthfd1l | 0.0484                           | -0.09           | 0.64          | -1.10           | <u>0.0030</u> | 0.27            | 0.19          | -1.19           | <u>0.0007</u> | Monofunctional C1-tetrahydrofolate synthase, mitochondrial  | Q3V3R1     |
| Mtmr1   | -2.7887                          | 1.74            | <u>0.0010</u> | -0.47           | 0.073         | -0.06           | 0.9           | 1.27            | <u>0.0320</u> | Phosphatidylinositol-3,5-bisphosphate 3-phosphatase         | I7HJQ9     |
| Mtmr12  | -0.0004                          | 1.29            | 0.92          | -1.06           | 0.98          | -0.20           | 0.95          | 0.22            | 0.62          | Myotubularin-related protein 12                             | Q80TA6     |
| Mtor    | -1.3641                          | 1.13            | <u>0.0160</u> | -0.73           | 0.12          | -0.06           | 0.93          | 0.40            | 0.61          | Serine/threonine-protein kinase mTOR                        | Q9JLN9     |
| Mtpap   | -1.9642                          | 1.05            | 0.051         | -1.26           | 0.071         | 0.90            | <u>0.0470</u> | -0.21           | 0.53          | Poly(A) RNA polymerase, mitochondrial                       | Q9D0D3     |
| Mtus2   | 0.0001                           | 0.81            | 0.15          | 0.01            | 0.95          | 0.62            | 0.47          | 0.82            | 0.15          | Microtubule-associated tumor suppressor candidate 2 homolog | Q3UHD3     |
| Mtx1    | -0.2070                          | 0.52            | 0.12          | -0.40           | 0.083         | 0.28            | 0.88          | 0.12            | 0.86          | Metaxin-1                                                   | A0A6I8MWZ8 |
| Mtx2    | 0.0000                           | -0.02           | 0.86          | 0.30            | 1             | 0.12            | 0.9           | 0.28            | 0.97          | Metaxin-2                                                   | O88441     |
| Mvp     | 0.0773                           | -0.24           | 0.1           | -0.35           | 0.12          | 0.09            | 0.52          | -0.59           | <u>0.0017</u> | Major vault protein                                         | E9Q3X0     |
| Mycbp2  | -0.0026                          | 0.15            | 0.94          | -1.18           | 0.28          | -0.61           | 0.2           | -1.03           | <u>0.0010</u> | E3 ubiquitin-protein ligase MYCBP2                          | Q7TPH6     |
| Myef2   | -0.2321                          | 0.58            | 0.4           | -0.88           | 0.072         | -0.68           | 0.19          | -0.30           | 0.45          | Myelin expression factor 2 (Fragment)                       | G8JL68     |
| Myh10   | -3.2086                          | 0.97            | 0.33          | -2.29           | <u>0.0010</u> | 0.05            | 0.72          | -1.31           | <u>0.0001</u> | Myosin-10                                                   | Q5SV64     |
| Myh14   | -4.7014                          | 1.59            | 0.097         | -1.60           | <u>0.0150</u> | 1.22            | 0.2           | -0.01           | 0.76          | Myosin-14                                                   | K3W4R2     |
| Myh9    | -3.6517                          | 0.81            | 0.45          | -3.25           | <u>0.0001</u> | -0.11           | 0.93          | -2.44           | <u>0.0001</u> | Myosin-9                                                    | Q8VDD5     |
| Myl12b  | -0.0732                          | 1.01            | 0.39          | -1.10           | 0.69          | 0.47            | 0.45          | -0.09           | 0.82          | Myosin regulatory light chain 12B                           | Q3THE2     |
| Myl6    | 0.0004                           | -0.20           | 0.59          | -0.09           | 0.8           | 0.45            | <u>0.0340</u> | -0.29           | 0.67          | Myosin light polypeptide 6                                  | A0A1W2P6F6 |
| Mylk    | -0.4344                          | 0.71            | 0.5           | -2.12           | 0.11          | 0.20            | 0.63          | -1.41           | 0.3           | Myosin light chain kinase, smooth muscle                    | B1B1A8     |
| Myo1b   | 0.0072                           | -0.06           | 0.48          | -0.44           | 0.14          | 0.26            | 0.54          | -0.50           | 0.45          | Myo1b protein                                               | Q7TQD7     |
| Myo1c   | -0.0680                          | 0.55            | 0.67          | -1.18           | 0.25          | 0.29            | 0.96          | -0.63           | 0.6           | Unconventional myosin-Ic                                    | Q9WTI7     |
| Myo1d   | -0.6315                          | 0.48            | 0.29          | -1.56           | <u>0.0270</u> | 0.60            | <u>0.0170</u> | -1.08           | 0.21          | Unconventional myosin-Id                                    | Q5SYD0     |
| Myo5a   | -18.6516                         | 0.99            | <u>0.0010</u> | -1.57           | <u>0.0001</u> | 0.45            | 0.069         | -0.58           | <u>0.0070</u> | Unconventional myosin-Va                                    | Q99104     |
| Myo6    | -0.3965                          | 0.83            | 0.56          | -1.58           | 0.063         | 1.21            | 0.29          | -0.75           | 0.35          | Unconventional myosin-6                                     | E9Q175     |
| Nap1l1  | -0.0009                          | -0.12           | 0.54          | 0.12            | 0.6           | -0.01           | 0.97          | 0.00            | 0.96          | Nucleosome assembly protein 1-like 1                        | Q3TF41     |
| Napa    | -0.0012                          | -0.45           | 0.082         | 0.09            | 0.94          | -0.31           | 0.18          | -0.37           | 0.088         | Alpha-soluble NSF attachment protein                        | Q9DB05     |
| Napb    | -0.3701                          | 0.44            | 0.069         | -0.51           | <u>0.0380</u> | -0.55           | 0.24          | -0.07           | 0.75          | Beta-soluble NSF attachment protein                         | P28663     |
| Napg    | 0.0000                           | -0.06           | 1             | 0.16            | 0.83          | -0.14           | 0.81          | 0.10            | 0.83          | Gamma-soluble NSF attachment protein (Fragment)             | D3Z4B2     |
| Nars    | -0.0007                          | -0.25           | 0.05          | 0.24            | 0.98          | 0.06            | 0.51          | -0.01           | 0.8           | Asparagine-tRNA ligase                                      | A0A498WGK2 |

Table S2: Differentially expressed proteins in cerebral cortex (*continued*)

| gene    | $\pi_{TW/EW} \times \pi_{TF/TW}$ | log2FC<br>TW/EW | padj<br>TW/EW | log2FC<br>TF/TW | padj<br>TF/TW | log2FC<br>EF/EW | padj<br>EF/EW | log2FC<br>TF/EW | padj<br>TF/EW | description                                                                  | accession  |
|---------|----------------------------------|-----------------|---------------|-----------------|---------------|-----------------|---------------|-----------------|---------------|------------------------------------------------------------------------------|------------|
| Nasp    | -0.0218                          | -0.38           | 0.35          | 0.50            | 0.56          | -0.19           | 0.54          | 0.12            | 0.82          | Nuclear autoantigenic sperm protein                                          | B1AU75     |
| Nav1    | -1.0974                          | 1.26            | 0.18          | -1.22           | 0.11          | -0.43           | 0.38          | 0.04            | 0.65          | Neuron navigator 1                                                           | Q8CH77     |
| Naxd    | 0.1349                           | 0.14            | 0.5           | 0.80            | <u>0.0001</u> | -0.14           | 0.6           | 0.95            | <u>0.0030</u> | ATP-dependent (S)-NAD(P)H-hydrate dehydratase                                | J3QMM7     |
| Nbea    | -0.0001                          | 0.04            | 0.62          | -0.04           | 0.58          | -0.02           | 0.94          | -0.01           | 0.9           | Neurobeachin                                                                 | Q9EPN1     |
| Ncam1   | 0.0006                           | -0.15           | 0.47          | -0.06           | 0.64          | 0.08            | 0.69          | -0.21           | 0.3           | Neural cell adhesion molecule 1 (Fragment)                                   | A0A0A6YY91 |
| Ncam2   | -0.0082                          | -0.45           | 0.44          | 0.23            | 0.6           | 0.19            | 0.74          | -0.23           | 0.33          | Neural cell adhesion molecule 2                                              | O35136     |
| Ncan    | -0.0025                          | -0.29           | 0.15          | 0.08            | 0.74          | -0.26           | <u>0.0040</u> | -0.21           | 0.16          | Neurocan core protein                                                        | A0A0R4IZX5 |
| Ncdn    | 0.0062                           | -0.33           | 0.37          | -0.19           | 0.59          | -0.39           | <u>0.057</u>  | -0.52           | 0.063         | Neurochondrin                                                                | Q9Z0E0     |
| Nceh1   | 0.0000                           | 0.05            | 0.86          | 0.02            | 0.92          | -0.15           | 0.9           | 0.07            | 0.66          | Neutral cholesterol ester hydrolase 1                                        | Q8BLF1     |
| Nck1    | 0.0036                           | 0.05            | 0.88          | 1.64            | 0.16          | 1.70            | 0.12          | 1.69            | 0.16          | Cytoplasmic protein NCK1                                                     | Q99M51     |
| Nck2    | -0.0034                          | 0.35            | 0.4           | -0.15           | 0.69          | -0.35           | 0.39          | 0.21            | 0.38          | Cytoplasmic protein NCK2                                                     | O55033     |
| Nckap1  | 0.0000                           | 0.00            | 0.63          | 0.23            | 0.83          | 0.10            | 0.54          | 0.22            | 0.55          | Nck-associated protein 1                                                     | A2AS98     |
| Nckipsd | -0.0003                          | -0.12           | 0.61          | 0.08            | 0.74          | -0.08           | 0.84          | -0.04           | 0.99          | NCK-interacting protein with SH3 domain                                      | Q9ESJ4     |
| Ncl     | -1.4811                          | 0.58            | <u>0.0005</u> | -0.32           | <u>0.0040</u> | -0.11           | 0.74          | 0.26            | 0.22          | Nucleolin                                                                    | P09405     |
| Ncln    | -0.0251                          | 0.40            | 0.62          | -0.78           | 0.41          | 0.59            | 0.4           | -0.38           | 0.78          | Nicalin                                                                      | D3YU17     |
| Ncoa7   | 0.0000                           | 0.02            | 0.89          | 0.28            | 0.93          | 0.36            | 0.19          | 0.30            | 0.95          | Nuclear receptor coactivator 7                                               | A0A1L1SSS4 |
| Ncstn   | -22.9110                         | 8.17            | 0.083         | -6.70           | 0.41          | 8.46            | <u>0.0280</u> | 1.47            | 0.3           | Nicastrin                                                                    | P57716     |
| Ndel1   | -0.1820                          | 0.89            | 0.22          | -0.74           | 0.38          | 0.96            | 0.23          | 0.16            | 0.68          | Nuclear distribution protein nudeE-like 1                                    | Q9ERR1     |
| Ndrp1   | -0.5551                          | 1.79            | 0.054         | -0.35           | 0.2           | 0.91            | 0.47          | 1.43            | 0.13          | Protein NDRG1                                                                | Q62433     |
| Ndrp2   | 0.0003                           | -0.05           | 0.73          | -0.13           | 0.51          | -0.08           | 0.5           | -0.18           | 0.41          | Protein NDRG2                                                                | Q9QYG0     |
| Ndrp3   | -0.0266                          | -0.26           | 0.54          | 0.48            | 0.16          | -0.19           | 0.41          | 0.22            | 0.32          | N-myc downstream-regulated gene 3 protein                                    | Q8VVCV2    |
| Ndufa10 | -0.0427                          | 0.15            | 0.49          | -0.77           | 0.064         | -0.26           | 0.76          | -0.62           | 0.13          | NADH dehydrogenase [ubiquinone] 1 alpha subcomplex subunit 10, mitochondrial | Q99LC3     |
| Ndufa12 | -1.4049                          | 0.43            | 0.28          | -1.97           | <u>0.0010</u> | -1.23           | 0.14          | -1.55           | <u>0.0480</u> | NADH dehydrogenase [ubiquinone] 1 alpha subcomplex subunit 12                | A0A0R4J275 |
| Ndufa13 | -1.4536                          | 0.61            | <u>0.0240</u> | -0.78           | <u>0.0130</u> | 0.08            | 0.65          | -0.17           | 0.59          | NADH dehydrogenase [ubiquinone] 1 alpha subcomplex subunit 13                | Q9ERS2     |
| Ndufa2  | -0.0023                          | 0.16            | 0.67          | -0.27           | 0.49          | 0.22            | 0.69          | -0.11           | 0.65          | NADH dehydrogenase [ubiquinone] 1 alpha subcomplex subunit 2                 | Q9CQ75     |
| Ndufa4  | -1.0978                          | 0.51            | <u>0.0110</u> | -0.51           | <u>0.0070</u> | 0.28            | 0.31          | 0.00            | 0.92          | Cytochrome c oxidase subunit NDUFA4                                          | Q62425     |
| Ndufa5  | -0.0839                          | 0.31            | 0.36          | -0.57           | 0.085         | -0.36           | 0.22          | -0.26           | 0.44          | NADH dehydrogenase [ubiquinone] 1 alpha subcomplex subunit 5                 | Q9CPP6     |
| Ndufa6  | -0.1352                          | 0.33            | 0.17          | -0.42           | 0.054         | 0.04            | 0.59          | -0.08           | 0.37          | NADH dehydrogenase [ubiquinone] 1 alpha subcomplex subunit 6                 | Q9CQZ5     |

Table S2: Differentially expressed proteins in cerebral cortex (*continued*)

| gene    | $\pi_{TW/EW} \times \pi_{TF/TW}$ | log2FC<br>TW/EW | padj<br>TW/EW | log2FC<br>TF/TW | padj<br>TF/TW | log2FC<br>EF/EW | padj<br>EF/EW | log2FC<br>TF/EW | padj<br>TF/EW | description                                                                 | accession  |
|---------|----------------------------------|-----------------|---------------|-----------------|---------------|-----------------|---------------|-----------------|---------------|-----------------------------------------------------------------------------|------------|
| Ndufa7  | -0.0010                          | 0.03            | 0.9           | -0.32           | <u>0.0050</u> | 0.08            | 0.73          | -0.29           | <u>0.0400</u> | NADH dehydrogenase [ubiquinone] 1 alpha subcomplex subunit 7                | Q9Z1P6     |
| Ndufa8  | -0.0469                          | 0.31            | 0.57          | -0.70           | 0.13          | -0.12           | 0.8           | -0.39           | 0.3           | NADH dehydrogenase [ubiquinone] 1 alpha subcomplex subunit 8                | Q9DCJ5     |
| Ndufa9  | -3.0458                          | 0.65            | 0.055         | -0.93           | <u>0.0001</u> | -0.03           | 0.85          | -0.28           | 0.1           | NADH dehydrogenase [ubiquinone] 1 alpha subcomplex subunit 9, mitochondrial | A0A0R3P9C8 |
| Ndufaf3 | -0.0426                          | 0.29            | 0.22          | -0.35           | 0.23          | 0.18            | 0.23          | -0.05           | 0.82          | NADH dehydrogenase [ubiquinone] 1 alpha subcomplex assembly factor 3        | Q9JKL4     |
| Ndufaf4 | -0.0037                          | -0.46           | 0.45          | 0.15            | 0.7           | -0.12           | 0.55          | -0.31           | 0.32          | NADH dehydrogenase [ubiquinone] 1 alpha subcomplex assembly factor 4        | Q9D1H6     |
| Ndufb1  | -0.0018                          | 0.28            | 0.59          | -0.17           | 0.69          | 0.40            | 0.34          | 0.10            | 0.74          | NADH dehydrogenase [ubiquinone] 1 beta subcomplex subunit 1                 | P0DN34     |
| Ndufb10 | -0.0158                          | 0.11            | 0.6           | -0.40           | <u>0.0240</u> | -0.04           | 0.72          | -0.29           | 0.19          | NADH dehydrogenase [ubiquinone] 1 beta subcomplex subunit 10                | Q9DCS9     |
| Ndufb11 | 0.0000                           | -0.18           | 0.61          | 0.02            | 0.96          | -0.04           | 0.73          | -0.16           | 0.38          | NADH dehydrogenase [ubiquinone] 1 beta subcomplex subunit 11, mitochondrial | O09111     |
| Ndufb3  | -0.0001                          | 0.03            | 0.77          | -0.10           | 0.58          | 0.33            | 0.59          | -0.07           | 0.76          | NADH dehydrogenase [ubiquinone] 1 beta subcomplex subunit 3                 | Q9CQZ6     |
| Ndufb4  | -0.6011                          | 0.83            | 0.1           | -0.91           | 0.16          | 0.08            | 0.78          | -0.08           | 0.8           | NADH dehydrogenase [ubiquinone] 1 beta subcomplex subunit 4                 | Q9CQC7     |
| Ndufb5  | -0.0016                          | 0.35            | 0.51          | -0.08           | 0.64          | 0.49            | 0.38          | 0.27            | 0.62          | Complex I-SGDH (Fragment)                                                   | D3YX99     |
| Ndufb6  | -0.0016                          | 0.25            | 0.72          | -0.24           | 0.65          | 0.13            | 0.96          | 0.01            | 0.93          | Complex I-B17                                                               | A2AP32     |
| Ndufb8  | -0.0004                          | 0.01            | 0.8           | -0.34           | 0.078         | 0.15            | 0.96          | -0.33           | 0.075         | NADH dehydrogenase [ubiquinone] 1 beta subcomplex subunit 8, mitochondrial  | Q9D6J5     |
| Ndufb9  | -0.0715                          | 0.36            | 0.19          | -0.37           | 0.18          | 0.30            | 0.25          | 0.00            | 0.98          | NADH dehydrogenase [ubiquinone] 1 beta subcomplex subunit 9                 | Q9CQJ8     |
| Ndufc2  | -0.0118                          | 0.18            | 0.65          | -0.50           | 0.2           | 0.32            | 0.59          | -0.32           | 0.23          | NADH dehydrogenase [ubiquinone] 1 subunit C2                                | Q9CQ54     |
| Ndufs1  | -0.2399                          | 0.32            | 0.14          | -0.51           | <u>0.0190</u> | 0.35            | 0.19          | -0.18           | 0.42          | NADH-ubiquinone oxidoreductase 75 kDa subunit, mitochondrial                | Q91VD9     |
| Ndufs2  | -0.0919                          | 0.39            | 0.61          | -0.86           | 0.053         | -0.91           | <u>0.0460</u> | -0.47           | 0.18          | Complex I-49kD                                                              | D3YXT0     |
| Ndufs3  | -3.1315                          | 0.84            | <u>0.0320</u> | -1.04           | <u>0.0040</u> | -0.13           | 0.79          | -0.20           | 0.8           | NADH dehydrogenase [ubiquinone] iron-sulfur protein 3, mitochondrial        | Q9DCT2     |
| Ndufs4  | -0.0038                          | 0.08            | 0.87          | -0.59           | <u>0.0470</u> | 0.04            | 0.67          | -0.52           | 0.051         | NADH dehydrogenase [ubiquinone] iron-sulfur protein 4, mitochondrial        | E9QPX3     |
| Ndufs7  | -2.0258                          | 0.53            | <u>0.0330</u> | -0.86           | <u>0.0010</u> | -0.77           | <u>0.0430</u> | -0.33           | 0.23          | NADH dehydrogenase [ubiquinone] iron-sulfur protein 7, mitochondrial        | Q9DC70     |
| Ndufs8  | -1.7125                          | 0.86            | 0.13          | -1.17           | <u>0.0120</u> | 0.25            | 0.67          | -0.31           | 0.71          | NADH dehydrogenase [ubiquinone] iron-sulfur protein 8, mitochondrial        | Q8K3J1     |

Table S2: Differentially expressed proteins in cerebral cortex (*continued*)

| gene     | $\pi_{TW/EW} \times \pi_{TF/TW}$ | log2FC<br>TW/EW | padj<br>TW/EW | log2FC<br>TF/TW | padj<br>TF/TW | log2FC<br>EF/EW | padj<br>EF/EW | log2FC<br>TF/EW | padj<br>TF/EW | description                                                      | accession  |
|----------|----------------------------------|-----------------|---------------|-----------------|---------------|-----------------|---------------|-----------------|---------------|------------------------------------------------------------------|------------|
| Ndufv1   | -0.0010                          | 0.12            | 0.7           | -0.21           | 0.54          | 0.02            | 0.81          | -0.09           | 0.74          | NADH dehydrogenase [ubiquinone]<br>flavoprotein 1, mitochondrial | D3YUM1     |
| Ndufv2   | -0.0667                          | 0.28            | 0.41          | -0.46           | <u>0.0460</u> | 0.16            | 0.66          | -0.19           | 0.17          | NADH dehydrogenase [ubiquinone]<br>flavoprotein 2, mitochondrial | Q9D6J6     |
| Ndufv3   | -0.0011                          | 0.11            | 0.43          | -0.09           | 0.5           | 0.33            | 0.091         | 0.02            | 0.79          | Complex I-9kD                                                    | Q3U422     |
| Nebi     | -4.2480                          | 0.49            | <u>0.0020</u> | -0.84           | <u>0.0001</u> | -0.01           | 0.89          | -0.35           | <u>0.0200</u> | LIM zinc-binding domain-containing<br>Nebulette                  | Q9DC07     |
| Necap1   | -0.0008                          | -0.10           | 0.93          | 0.78            | 0.47          | -0.27           | 0.53          | 0.68            | 0.48          | Adaptin ear-binding coat-associated<br>protein 1                 | Q9CR95     |
| Nectin1  | 0.0000                           | 0.01            | 1             | 0.34            | 0.14          | 0.23            | 0.089         | 0.35            | 0.059         | Nectin-1                                                         | Q9JKF6     |
| Nedd4    | -0.0001                          | -0.03           | 0.93          | 0.19            | 0.51          | 0.11            | 0.76          | 0.16            | 0.62          | E3 ubiquitin-protein ligase NEDD4                                | P46935     |
| Nefh     | -0.9549                          | 1.02            | 0.7           | -3.26           | <u>0.0140</u> | -0.24           | 0.82          | -2.24           | <u>0.0290</u> | Neurofilament heavy polypeptide                                  | P19246     |
| Nefl     | -47.1671                         | 1.97            | <u>0.0046</u> | -2.83           | <u>0.0002</u> | 0.16            | 0.67          | -0.85           | <u>0.0130</u> | Neurofilament light polypeptide                                  | P08551     |
| Nefm     | -10.6520                         | 1.20            | 0.12          | -2.41           | <u>0.0001</u> | 0.04            | 0.81          | -1.21           | <u>0.0001</u> | 160 kDa neurofilament protein                                    | A0A0R4J036 |
| Negr1    | -0.1388                          | 0.63            | 0.58          | -1.17           | 0.16          | -0.01           | 0.74          | -0.54           | 0.46          | Neuronal growth regulator 1                                      | A0A4W9     |
| Nell2    | 0.3622                           | 0.53            | 0.24          | 0.77            | <u>0.0370</u> | 0.09            | 0.74          | 1.30            | <u>0.0160</u> | Protein kinase C-binding protein NELL2                           | Q8BM06     |
| Nf1      | -0.0352                          | 0.55            | <u>0.0230</u> | -0.16           | 0.57          | 0.24            | 0.61          | 0.39            | 0.48          | Neurofibromin                                                    | Q04690     |
| Nfasc    | 0.0023                           | -0.12           | 0.44          | -0.07           | 0.17          | 0.42            | 0.096         | -0.19           | 0.66          | Neurofascin                                                      | A0A087WPX3 |
| Nfs1     | -0.3636                          | 0.59            | <u>0.0008</u> | -0.35           | 0.27          | -0.08           | 0.96          | 0.24            | 0.58          | Cysteine desulfurase, mitochondrial                              | Q9Z1J3     |
| Ngef     | -0.0048                          | -0.32           | 0.2           | 0.12            | 0.66          | -0.40           | 0.075         | -0.20           | 0.55          | Ephexin-1                                                        | E9QK62     |
| Nhs12    | -132.9397                        | 5.70            | <u>0.0480</u> | -7.01           | <u>0.0030</u> | 0.99            | 0.63          | -1.31           | 0.32          | NHS-like protein 2                                               | B1AXH1     |
| Niban2   | 0.0044                           | -0.22           | 0.42          | -0.23           | 0.59          | 0.03            | 0.83          | -0.45           | 0.11          | Protein Niban 2                                                  | Q8R1F1     |
| Nipsnap1 | 0.0499                           | 0.80            | <u>0.0066</u> | 0.07            | 0.39          | 0.09            | 0.88          | 0.87            | 0.077         | Protein NipSnap homolog 1                                        | O55125     |
| Nipsnap2 | 0.2199                           | 0.25            | <u>0.0230</u> | 0.56            | 0.11          | 0.32            | <u>0.0160</u> | 0.81            | <u>0.0001</u> | Protein NipSnap homolog 2                                        | O55126     |
| Nlgn2    | -0.0102                          | -0.17           | 0.43          | 0.25            | 0.22          | -0.55           | 0.32          | 0.09            | 0.59          | Neuroigin-2                                                      | Q69ZK9     |
| Nlgn3    | -0.7815                          | -3.16           | 0.2           | 1.21            | 0.51          | -1.53           | 0.54          | -1.95           | 0.49          | Neuroigin-3                                                      | A2AGI3     |
| Nln      | -0.0039                          | -0.38           | 0.077         | 0.06            | 0.7           | -0.07           | 0.67          | -0.31           | 0.14          | Neurolysin, mitochondrial                                        | Q91YP2     |
| Nme1     | -0.0004                          | -0.29           | 0.82          | 0.05            | 0.49          | -0.04           | 0.99          | -0.24           | 0.39          | Nucleoside diphosphate kinase A                                  | P15532     |
| Nme3     | -0.0024                          | -1.10           | 0.09          | 0.02            | 0.79          | -0.95           | 0.086         | -1.08           | 0.13          | Nucleoside diphosphate kinase 3                                  | Q9WV85     |
| Nme7     | 0.0000                           | 0.05            | 0.98          | 0.06            | 0.86          | 0.15            | 0.47          | 0.11            | 0.5           | Nucleoside diphosphate kinase 7                                  | Q3UMG6     |
| Nmral1   | 0.2160                           | -0.35           | <u>0.0220</u> | -0.50           | 0.18          | -0.51           | 0.063         | -0.85           | <u>0.0014</u> | NmrA-like family domain-containing<br>protein 1                  | D3YU12     |
| Nmt1     | -0.0028                          | -0.07           | 0.67          | 0.36            | 0.23          | 0.25            | 0.4           | 0.29            | 0.073         | Glycylpeptide N-tetradecanoyltransferase<br>1                    | O70310     |
| Nmt2     | -0.0083                          | -0.22           | 0.74          | 0.58            | 0.32          | -0.35           | 0.79          | 0.36            | 0.47          | Glycylpeptide N-tetradecanoyltransferase                         | A2AJH3     |
| Nnt      | -0.0428                          | 0.15            | 0.5           | -0.64           | <u>0.0330</u> | -0.44           | 0.06          | -0.48           | 0.089         | NAD(P) transhydrogenase, mitochondrial                           | Q61941     |
| Nolc1    | 0.0002                           | -0.35           | 0.7           | -0.20           | 0.96          | -0.21           | 0.78          | -0.55           | 0.55          | Nucleolar and coiled-body phosphoprotein<br>1                    | A0A286YDA2 |
| Nomo1    | 0.0001                           | 0.11            | 0.51          | 0.38            | 0.98          | -0.03           | 0.54          | 0.49            | 0.52          | Nodal modulator 1                                                | Q6GQT9     |



Table S2: Differentially expressed proteins in cerebral cortex (*continued*)

| gene   | $\pi_{TW/EW} \times \pi_{TF/TW}$ | log2FC<br>TW/EW | padj<br>TW/EW | log2FC<br>TF/TW | padj<br>TF/TW | log2FC<br>EF/EW | padj<br>EF/EW | log2FC<br>TF/EW | padj<br>TF/EW | description                                                          | accession  |
|--------|----------------------------------|-----------------|---------------|-----------------|---------------|-----------------|---------------|-----------------|---------------|----------------------------------------------------------------------|------------|
| Nono   | -0.0026                          | 0.80            | 0.82          | -0.75           | 0.89          | -0.13           | 0.29          | 0.05            | 0.64          | Non-POU domain-containing octamer-binding protein                    | Q99K48     |
| Nop56  | -54.5788                         | 7.56            | 0.14          | -8.82           | 0.11          | -1.18           | 0.59          | -1.26           | 0.54          | Nucleolar protein 56                                                 | Q9D6Z1     |
| Nos1   | -0.0034                          | -0.16           | 0.39          | 0.14            | 0.43          | -0.04           | 0.94          | -0.01           | 0.98          | Constitutive NOS                                                     | F8WGF2     |
| Nova1  | 0.0199                           | -0.32           | 0.64          | -0.43           | 0.18          | -0.40           | 0.48          | -0.75           | <u>0.0210</u> | RNA-binding protein Nova-1                                           | Q9JKN6     |
| Nova2  | -0.1194                          | -0.33           | <u>0.0190</u> | 0.20            | 0.089         | 0.09            | 0.85          | -0.13           | 0.22          | NOVA alternative-splicing regulator 2                                | A0A1W2P872 |
| Npepps | 0.0165                           | -0.13           | 0.33          | -0.22           | 0.063         | -0.03           | 0.61          | -0.35           | 0.43          | Puromycin-sensitive aminopeptidase                                   | Q11011     |
| Npm1   | 0.0000                           | 0.35            | <u>0.0300</u> | 0.02            | 0.99          | -0.21           | 0.2           | 0.37            | <u>0.0025</u> | Nucleophosmin                                                        | Q61937     |
| Nptn   | -2.5515                          | -0.63           | <u>0.0010</u> | 0.45            | <u>0.0010</u> | -0.19           | 0.081         | -0.18           | 0.13          | Neuroplastin                                                         | P97300     |
| Nptx1  | 0.0000                           | -0.02           | 0.76          | -0.05           | 0.45          | -0.19           | 0.58          | -0.07           | 0.68          | Neuronal pentraxin-1                                                 | Q62443     |
| Nptxr  | -0.0006                          | -0.04           | 0.82          | 0.29            | 0.25          | -0.25           | 0.34          | 0.25            | 0.28          | Neuronal pentraxin receptor                                          | E9PZM8     |
| Nras   | 0.0000                           | 0.00            | 0.77          | -0.61           | 0.11          | -0.27           | 0.98          | -0.61           | 0.18          | GTPase NRas                                                          | P08556     |
| Nrcam  | -0.3404                          | -0.33           | <u>0.0030</u> | 0.31            | <u>0.0480</u> | 0.00            | 0.65          | -0.02           | 0.3           | Neuronal cell adhesion molecule                                      | Q810U4     |
| Nrd1   | -0.4154                          | 1.69            | 0.2           | -0.86           | 0.39          | -6.23           | 0.16          | 0.83            | 0.56          | Nardilysin, N-arginine dibasic convertase, NRD convertase 1          | A2A9Q2     |
| Nrp1   | -0.0008                          | 0.88            | 0.84          | -0.53           | 0.95          | -0.55           | 0.69          | 0.35            | 0.78          | Neuropilin-1                                                         | P97333     |
| Nrxn1  | -1.2303                          | -0.71           | <u>0.0430</u> | 0.90            | <u>0.0390</u> | 0.67            | 0.15          | 0.19            | 0.63          | Neurexin-1                                                           | Q9CS84     |
| Nrxn2  | -0.0068                          | 0.36            | 0.6           | -0.79           | 0.78          | 2.75            | 0.29          | -0.43           | 0.65          | Neurexin-2                                                           | E9PUM9     |
| Nrxn3  | -0.1037                          | 0.62            | <u>0.0079</u> | -0.10           | 0.16          | 0.12            | 0.68          | 0.52            | 0.35          | Neurexin-3                                                           | Q6P9K9     |
| Nsf    | -0.0286                          | 0.08            | 0.13          | -0.16           | <u>0.0030</u> | -0.12           | 0.061         | -0.08           | 0.099         | Vesicle-fusing ATPase                                                | P46460     |
| Nsfl1c | 0.0013                           | -0.22           | 0.51          | -0.16           | 0.74          | -0.13           | 0.61          | -0.38           | 0.31          | NSFL1 cofactor p47                                                   | Q9CZ44     |
| Nsmf   | -9.9579                          | 2.25            | <u>0.0200</u> | -1.33           | <u>0.0110</u> | 0.90            | 0.51          | 0.92            | 0.52          | NMDA receptor synaptonuclear-signaling and neuronal migration factor | A2AJ92     |
| Nt5dc3 | -0.1433                          | 0.50            | 0.43          | -0.72           | 0.082         | -0.28           | 0.89          | -0.23           | 0.81          | 5'-nucleotidase domain-containing protein 3                          | Q3UHB1     |
| Ntm    | -1.9063                          | 0.57            | <u>0.0170</u> | -0.63           | <u>0.0010</u> | 0.12            | 0.66          | -0.06           | 0.95          | Neurotrimin                                                          | D3Z396     |
| Ntrk3  | -0.0873                          | 0.87            | 0.099         | -0.62           | 0.69          | 0.20            | 0.45          | 0.25            | 0.52          | Tyrosine-protein kinase receptor                                     | A0A0A6YWF9 |
| Nudc   | -0.0196                          | -0.28           | <u>0.0470</u> | 0.14            | 0.42          | 0.15            | 0.25          | -0.14           | 0.42          | Nuclear migration protein nudC                                       | O35685     |
| Nudcd3 | 0.0000                           | -0.01           | 1             | -0.23           | 0.73          | -0.27           | 0.47          | -0.25           | 0.61          | NudC domain-containing protein 3                                     | Q8R1N4     |
| Nudt16 | -0.0020                          | 0.01            | 0.64          | -0.75           | <u>0.0430</u> | 0.24            | 0.6           | -0.74           | 0.12          | U8 snoRNA-decapping enzyme (Fragment)                                | A0A087WRE5 |
| Nudt2  | -1.0738                          | 4.34            | 0.14          | -2.99           | 0.8           | 5.07            | 0.28          | 1.35            | 0.47          | Bis(5'-nucleosyl)-tetraphosphatase [asymmetrical]                    | P56380     |
| Nudt5  | -1.1209                          | 3.33            | 0.74          | -4.40           | 0.26          | 0.51            | 0.8           | -1.07           | 0.8           | ADP-sugar pyrophosphatase                                            | Q9JKX6     |
| Numb   | 0.0001                           | -0.13           | 0.69          | -0.26           | 0.95          | 0.29            | 0.49          | -0.39           | 0.93          | Protein numb homolog                                                 | Q9QZS3     |
| Numbl  | 0.0000                           | 0.01            | 0.98          | -0.20           | 0.2           | 0.05            | 0.94          | -0.20           | 0.19          | Numb-like protein                                                    | O08919     |
| Nup93  | -0.0001                          | -0.44           | 0.98          | 0.13            | 0.58          | -0.38           | 0.25          | -0.31           | 0.6           | Nuclear pore complex protein Nup93                                   | Q8BJ71     |
| Nup98  | -0.0038                          | -0.13           | 0.93          | 0.54            | <u>0.0200</u> | -0.03           | 0.98          | 0.41            | 0.21          | Nuclear pore complex protein Nup96                                   | A0A1B0GSX7 |

Table S2: Differentially expressed proteins in cerebral cortex (*continued*)

| gene   | $\pi_{TW/EW} \times \pi_{TF/TW}$ | log2FC<br>TW/EW | padj<br>TW/EW | log2FC<br>TF/TW | padj<br>TF/TW | log2FC<br>EF/EW | padj<br>EF/EW | log2FC<br>TF/EW | padj<br>TF/EW | description                                                                     | accession  |
|--------|----------------------------------|-----------------|---------------|-----------------|---------------|-----------------|---------------|-----------------|---------------|---------------------------------------------------------------------------------|------------|
| Nutf2  | 0.0108                           | -1.07           | <u>0.0280</u> | -0.06           | 0.78          | -0.22           | 0.27          | -1.13           | <u>0.0280</u> | Nuclear transport factor 2                                                      | P61971     |
| Nwd2   | 0.0000                           | -0.06           | 0.85          | -0.06           | 0.69          | 0.00            | 0.92          | -0.12           | 0.53          | NACHT and WD repeat domain-containing protein 2                                 | Q6P5U7     |
| Oat    | -0.0047                          | -0.93           | 0.1           | 0.03            | 0.68          | -0.50           | 0.33          | -0.91           | 0.12          | Ornithine aminotransferase, mitochondrial                                       | P29758     |
| Ociad1 | -0.0011                          | -0.30           | 0.59          | 0.14            | 0.77          | 0.32            | 0.28          | -0.16           | 0.73          | OCIA domain-containing protein 1                                                | Q9CRD0     |
| Ociad2 | -0.3337                          | -0.54           | 0.37          | 1.10            | 0.05          | 0.35            | 0.22          | 0.56            | <u>0.0300</u> | OCIA domain-containing protein 2                                                | Q9D8W7     |
| Ocr1   | -0.0420                          | -0.10           | 0.53          | 0.98            | <u>0.0280</u> | 0.09            | 0.62          | 0.89            | <u>0.0280</u> | Inositol polyphosphate 5-phosphatase OCRL                                       | Q6NVF0     |
| Oga    | 0.0007                           | 0.56            | <u>0.0450</u> | 0.10            | 0.98          | -0.06           | 0.93          | 0.66            | <u>0.0120</u> | Protein O-GlcNAcase                                                             | Q9EEQ9     |
| Ogdh   | -0.0360                          | -0.14           | 0.26          | 0.28            | <u>0.0270</u> | 0.13            | 0.66          | 0.13            | 0.26          | 2-oxoglutarate dehydrogenase, mitochondrial                                     | Q60597     |
| Ogdhl  | -0.0004                          | -0.05           | 0.89          | 0.20            | 0.2           | -0.07           | 0.25          | 0.16            | 0.25          | Ogdhl protein                                                                   | B2RXT3     |
| Ogt    | -0.3321                          | 0.22            | <u>0.0120</u> | -0.30           | <u>0.0024</u> | 0.01            | 0.64          | -0.08           | 0.87          | UDP-N-acetylglucosamine-peptide N-acetylglucosaminyltransferase 110 kDa subunit | Q8CGY8     |
| Ola1   | -0.0004                          | -0.07           | 0.89          | 0.15            | 0.2           | -0.16           | 0.24          | 0.08            | 0.35          | Obg-like ATPase 1                                                               | Q9CZ30     |
| Olfm1  | 0.0000                           | -0.37           | <u>0.0008</u> | 0.00            | 0.8           | 0.23            | 1             | -0.37           | <u>0.0010</u> | Noelin                                                                          | Q8R357     |
| Olfm2  | -0.0920                          | -0.38           | <u>0.0050</u> | 0.16            | 0.22          | 0.42            | <u>0.0001</u> | -0.22           | 0.095         | Noelin-2                                                                        | A0A1L1SV46 |
| Olfm3  | -1.7573                          | 0.63            | <u>0.0280</u> | -0.72           | <u>0.0032</u> | 0.51            | 0.17          | -0.10           | 0.65          | Noelin-3                                                                        | P63056     |
| Omg    | -0.0009                          | 0.18            | 0.95          | -0.59           | 0.4           | -0.18           | 0.56          | -0.41           | 0.26          | Oligodendrocyte-myelin glycoprotein                                             | G3XA53     |
| Opa1   | 0.0094                           | 0.17            | 0.58          | 0.50            | 0.34          | -0.01           | 0.88          | 0.67            | 0.079         | Dynamin-like 120 kDa protein, form S1                                           | H7BX01     |
| Opa3   | 0.2215                           | 1.05            | <u>0.0120</u> | 0.21            | 0.3           | 0.21            | 0.87          | 1.26            | <u>0.0070</u> | Optic atrophy 3 protein homolog                                                 | Q505D7     |
| Opcml  | -0.8103                          | 0.39            | <u>0.0200</u> | -0.51           | <u>0.0040</u> | -0.24           | 0.28          | -0.12           | 0.93          | Opioid-binding protein/cell adhesion molecule-like                              | G5E8G3     |
| Osbp   | -0.1355                          | 0.23            | 0.24          | -1.36           | 0.2           | -1.10           | 0.5           | -1.14           | 0.46          | Oxysterol-binding protein 1                                                     | Q3B7Z2     |
| Osbpl6 | 0.0015                           | -0.07           | 0.79          | -0.40           | 0.29          | -0.05           | 0.92          | -0.47           | 0.19          | Oxysterol-binding protein (Fragment)                                            | V9GXX3     |
| Osbpl8 | -0.0001                          | 0.05            | 0.97          | -0.94           | 0.64          | -2.25           | 0.34          | -0.89           | 0.68          | Oxysterol-binding protein                                                       | A0A0R4J150 |
| Oxct1  | 0.0081                           | -0.11           | 0.68          | -0.34           | 0.05          | 0.06            | 0.83          | -0.45           | <u>0.0070</u> | Succinyl-CoA:3-ketoacid coenzyme A transferase 1, mitochondrial                 | Q9D0K2     |
| Oxr1   | 0.0004                           | -0.03           | 0.91          | -0.24           | <u>0.0460</u> | 0.24            | 0.82          | -0.27           | <u>0.0190</u> | Oxidation resistance protein 1                                                  | Q4KMM3     |
| Oxsm   | 0.0266                           | -0.12           | 0.59          | -1.05           | 0.12          | -0.26           | 0.41          | -1.17           | <u>0.0067</u> | 3-oxoacyl-[acyl-carrier-protein] synthase, mitochondrial                        | Q9D404     |
| Oxsr1  | -0.8930                          | 0.26            | 0.32          | -5.51           | 0.055         | -4.91           | 0.1           | -5.25           | 0.11          | Serine/threonine-protein kinase OSR1                                            | Q6P9R2     |
| P4hb   | -0.0799                          | -0.49           | 0.26          | 0.49            | 0.27          | 0.25            | 0.54          | 0.00            | 1             | Protein disulfide-isomerase                                                     | P09103     |
| Pa2g4  | -0.0127                          | 0.17            | 0.19          | -0.13           | 0.16          | 0.04            | 0.91          | 0.04            | 0.68          | Proliferation-associated protein 2G4                                            | P50580     |
| Pabpc1 | -0.0583                          | 0.80            | <u>0.0054</u> | -0.12           | 0.54          | 0.07            | 0.82          | 0.68            | 0.11          | Polyadenylate-binding protein 1                                                 | P29341     |
| Pacs1  | 0.0004                           | 0.12            | 0.86          | 0.18            | 0.52          | 0.21            | 0.5           | 0.30            | 0.33          | Phosphofurin acidic cluster sorting protein 1                                   | Q8K212     |

Table S2: Differentially expressed proteins in cerebral cortex (*continued*)

| gene     | $\pi_{\text{TW/EW}} \times \pi_{\text{TF/TW}}$ | log2FC<br>TW/EW | padj<br>TW/EW | log2FC<br>TF/TW | padj<br>TF/TW | log2FC<br>EF/EW | padj<br>EF/EW | log2FC<br>TF/EW | padj<br>TF/EW | description                                                             | accession  |
|----------|------------------------------------------------|-----------------|---------------|-----------------|---------------|-----------------|---------------|-----------------|---------------|-------------------------------------------------------------------------|------------|
| Pacsin1  | -0.0090                                        | -0.01           | 0.34          | 0.63            | <u>0.0009</u> | -0.12           | 0.33          | 0.62            | <u>0.0010</u> | Protein kinase C and casein kinase substrate in neurons protein 1       | Q61644     |
| Pacsin2  | 0.0650                                         | 0.13            | 0.089         | 0.66            | 0.19          | -0.29           | 0.17          | 0.78            | <u>0.0001</u> | Protein kinase C and casein kinase substrate in neurons protein 2       | Q9WVE8     |
| Pacsin3  | -0.0001                                        | -0.06           | 0.7           | 0.06            | 0.6           | -0.46           | 0.56          | 0.00            | 1             | Protein kinase C and casein kinase II substrate protein 3               | Q99JB8     |
| Padi2    | -0.0436                                        | -0.74           | 0.089         | 0.27            | 0.62          | -1.20           | 0.082         | -0.47           | 0.12          | Protein-arginine deiminase type-2                                       | Q08642     |
| Pafah1b1 | -0.0001                                        | -0.05           | 0.82          | 0.08            | 0.66          | -0.32           | 0.15          | 0.03            | 0.81          | Platelet-activating factor acetylhydrolase IB subunit beta              | P63005     |
| Pafah1b2 | -0.0171                                        | -0.75           | <u>0.0280</u> | 0.06            | 0.57          | -0.04           | 0.93          | -0.68           | <u>0.0280</u> | Platelet-activating factor acetylhydrolase IB subunit alpha2 (Fragment) | A0A1L1SVK0 |
| Pafah1b3 | -0.0141                                        | 1.08            | 0.67          | -0.93           | 0.83          | 0.23            | 0.66          | 0.15            | 0.64          | Platelet-activating factor acetylhydrolase IB subunit alpha1            | Q61205     |
| Paics    | 0.1991                                         | -0.63           | 0.67          | -1.64           | 0.078         | -0.84           | 0.67          | -2.28           | <u>0.0060</u> | Multifunctional protein ADE2                                            | Q9DCL9     |
| Pak1     | -0.0004                                        | -0.24           | 0.095         | 0.18            | 0.98          | -0.09           | 0.42          | -0.06           | 0.37          | Serine/threonine-protein kinase PAK 1                                   | O88643     |
| Pak5     | -0.0051                                        | 0.26            | 0.73          | -0.48           | 0.5           | 0.51            | 0.32          | -0.22           | 0.45          | Serine/threonine-protein kinase PAK 5                                   | Q8C015     |
| Palm     | 0.0002                                         | -0.03           | 0.21          | -0.07           | 0.72          | 0.44            | 0.11          | -0.10           | 0.44          | Paralemmin-1                                                            | Q9Z0P4     |
| Palm2    | -2.2082                                        | 0.62            | 0.089         | -1.13           | <u>0.0010</u> | 0.50            | 0.95          | -0.50           | 0.14          | Paralemmin-2                                                            | Q8BR92     |
| Pam16    | 0.0000                                         | 0.01            | 1             | 0.06            | <u>0.6</u>    | 0.50            | <u>0.0280</u> | 0.08            | 0.78          | Mitochondrial import inner membrane translocase subunit TIM16           | Q9CQV1     |
| Park7    | -0.2772                                        | -0.46           | <u>0.0001</u> | 0.17            | 0.13          | -0.43           | <u>0.0002</u> | -0.29           | <u>0.0008</u> | Parkinson disease protein 7 homolog                                     | Q99LX0     |
| Pcbd2    | -0.0055                                        | 0.39            | 0.81          | -0.82           | 0.65          | -0.45           | 0.97          | -0.42           | 0.66          | 4a-hydroxytetrahydrobiopterin dehydratase                               | A0A0R4J1R7 |
| Pcbp1    | -0.0005                                        | -0.12           | 0.9           | 0.39            | 0.57          | -0.21           | 0.59          | 0.27            | 0.57          | Poly(rC)-binding protein 1                                              | P60335     |
| Pcca     | 0.0000                                         | 0.03            | 0.48          | 0.14            | 0.94          | -0.21           | 0.22          | 0.17            | 0.97          | Propionyl-CoA carboxylase alpha chain, mitochondrial                    | Q91ZA3     |
| Pccb     | 0.0015                                         | 0.29            | 0.51          | 0.14            | 0.75          | -0.80           | 0.4           | 0.43            | 0.32          | Propionyl-CoA carboxylase beta chain, mitochondrial                     | E9Q1J7     |
| Pcdh1    | 0.0000                                         | -0.06           | 0.97          | 0.17            | 0.62          | -0.08           | 0.89          | 0.10            | 0.61          | Protocadherin 1                                                         | Q8CFX3     |
| Pcdh10   | 0.0019                                         | -0.18           | 0.35          | -0.11           | 0.62          | 0.28            | 0.52          | -0.29           | 0.16          | Protocadherin 10                                                        | E9PX28     |
| Pcdh19   | -12.5675                                       | 1.50            | <u>0.0080</u> | -2.04           | <u>0.0110</u> | 0.74            | 0.39          | -0.53           | 0.68          | Protocadherin-19                                                        | E9Q5E1     |
| Pcdh7    | -0.0004                                        | 0.19            | 0.64          | -0.03           | 0.45          | 0.51            | 0.49          | 0.16            | 0.95          | Protocadherin 7                                                         | A0A0A6YY83 |
| Pcdh8    | 0.0046                                         | -0.19           | 0.67          | -3.06           | 0.9           | -2.99           | 0.83          | -3.25           | 0.77          | Protocadherin-8                                                         | Q7TSK3     |
| Pcdh9    | 0.0000                                         | 0.01            | 0.96          | 0.14            | 0.18          | 0.07            | 0.36          | 0.15            | <u>0.0130</u> | Protocadherin 9                                                         | A0A0A6YWY8 |
| Pcdhgb5  | -4.0490                                        | 1.46            | 0.13          | -5.35           | 0.26          | 0.08            | 0.73          | -3.90           | 0.7           | Protocadherin gamma B5                                                  | Q91XX5     |
| Pcdhgc5  | -0.0006                                        | 0.37            | 0.77          | -0.37           | 0.92          | -0.43           | 0.48          | 0.00            | 0.75          | Pcdhgc5 protein                                                         | Q91XW9     |
| Pclo     | -21.2808                                       | 1.12            | <u>0.0020</u> | -1.76           | <u>0.0001</u> | -0.17           | <u>0.0260</u> | -0.64           | <u>0.0001</u> | Protein piccolo                                                         | Q9QYX7     |
| Pcmt1    | -0.0041                                        | -0.47           | <u>0.0020</u> | 0.04            | 0.83          | -0.22           | 0.26          | -0.43           | <u>0.0005</u> | Protein-L-isoaspartate O-methyltransferase                              | E0CYV0     |

Table S2: Differentially expressed proteins in cerebral cortex (*continued*)

| gene    | $\pi_{TW/EW} \times \pi_{TF/TW}$ | log2FC<br>TW/EW | padj<br>TW/EW | log2FC<br>TF/TW | padj<br>TF/TW | log2FC<br>EF/EW | padj<br>EF/EW | log2FC<br>TF/EW | padj<br>TF/EW | description                                                                    | accession  |
|---------|----------------------------------|-----------------|---------------|-----------------|---------------|-----------------|---------------|-----------------|---------------|--------------------------------------------------------------------------------|------------|
| Pcnp    | -0.0078                          | 0.91            | 0.71          | -0.76           | 0.84          | 1.82            | 0.23          | 0.15            | 0.64          | PEST proteolytic signal-containing nuclear protein                             | F8WI88     |
| Pcsk1   | -0.0089                          | 0.12            | 0.73          | -0.52           | 0.091         | -0.69           | 0.22          | -0.40           | 0.25          | Neuroendocrine convertase 1                                                    | P63239     |
| Pcsk1n  | -0.0004                          | -0.40           | 0.88          | 0.04            | 0.36          | -0.15           | 0.91          | -0.36           | 0.48          | ProSAAS                                                                        | Q9QXV0     |
| Pcx     | -0.0051                          | 0.09            | 0.44          | -0.24           | 0.22          | 0.19            | 0.56          | -0.15           | 0.72          | Pyruvate carboxylase                                                           | G5E8R3     |
| Pcyt2   | 0.0345                           | 4.83            | 0.39          | 0.14            | 0.75          | 5.22            | 0.37          | 4.97            | 0.38          | Ethanolamine-phosphate cytidyltransferase                                      | A2ABY3     |
| Pdap1   | -0.1654                          | -1.02           | <u>0.0056</u> | 0.43            | 0.68          | -0.37           | 0.45          | -0.59           | 0.25          | 28 kDa heat- and acid-stable phosphoprotein                                    | Q3UHX2     |
| Pdcd10  | -0.0125                          | 0.30            | 0.46          | -0.27           | 0.35          | 0.19            | 0.63          | 0.03            | 0.76          | Programmed cell death protein 10                                               | Q8VE70     |
| Pdcd5   | 0.0091                           | -0.11           | 0.54          | -0.39           | 0.16          | -0.01           | 0.74          | -0.50           | 0.49          | Programmed cell death protein 5                                                | P56812     |
| Pdcd6ip | -0.0001                          | 0.02            | 0.82          | -0.08           | 0.4           | -0.03           | 0.49          | -0.06           | 0.53          | Programmed cell death 6-interacting protein                                    | Q9WU78     |
| Pdcl    | -0.0374                          | -0.73           | 0.43          | 0.63            | 0.6           | -1.60           | 0.38          | -0.10           | 0.89          | Phosducin-like protein                                                         | Q9DBX2     |
| Pde10a  | 0.0050                           | 0.92            | 0.38          | 0.14            | 0.81          | 0.94            | 0.11          | 1.06            | 0.29          | Phosphodiesterase                                                              | A0A384DV92 |
| Pde1a   | 0.0076                           | 0.19            | 0.34          | 0.22            | 0.41          | 0.15            | 0.44          | 0.41            | 0.27          | Phosphodiesterase                                                              | A2ASF9     |
| Pde4d   | -0.0064                          | 0.22            | 0.74          | -0.59           | 0.42          | -0.29           | 0.14          | -0.38           | 0.055         | Phosphodiesterase (Fragment)                                                   | F6QFD1     |
| Pde9a   | 0.0000                           | -0.49           | 0.11          | 0.27            | 1             | -0.17           | 0.55          | -0.22           | 0.38          | High affinity cGMP-specific 3',5'-cyclic phosphodiesterase 9A                  | A0A494BAI4 |
| Pdha1   | -0.0017                          | -0.06           | 0.17          | 0.07            | 0.29          | -0.05           | 1             | 0.01            | 0.89          | Pyruvate dehydrogenase E1 component subunit alpha, somatic form, mitochondrial | P35486     |
| Pdhb    | -0.0011                          | -0.10           | 0.55          | 0.12            | 0.43          | -0.17           | <u>0.0030</u> | 0.02            | 0.27          | Pyruvate dehydrogenase E1 component subunit beta, mitochondrial                | Q9D051     |
| Pdhx    | 0.0003                           | -0.14           | 0.93          | -0.09           | 0.2           | -0.37           | 0.081         | -0.23           | 0.31          | Pyruvate dehydrogenase protein X component, mitochondrial                      | Q8BKZ9     |
| Pdia3   | 0.0000                           | 0.00            | 0.99          | 0.13            | 0.15          | -0.17           | <u>0.0120</u> | 0.13            | 0.12          | Protein disulfide-isomerase A3                                                 | P27773     |
| Pdia4   | 0.0000                           | -0.10           | 0.38          | 0.02            | 0.94          | -0.12           | 0.49          | -0.08           | 0.66          | Protein disulfide-isomerase A4                                                 | A0A0R4J0Z1 |
| Pdia6   | 0.1832                           | 0.17            | 0.21          | 0.53            | <u>0.0010</u> | -0.05           | 0.48          | 0.69            | <u>0.0030</u> | Protein disulfide-isomerase A6                                                 | F7DBQ0     |
| Pdk1    | 0.0067                           | 0.60            | 0.35          | 0.14            | 0.67          | 0.22            | 0.91          | 0.74            | 0.24          | [Pyruvate dehydrogenase (acetyl-transferring)] kinase isozyme 1, mitochondrial | Q8BFP9     |
| Pdk2    | 0.0006                           | 0.06            | 0.65          | 0.16            | 0.44          | -0.21           | 0.31          | 0.21            | 0.27          | [Pyruvate dehydrogenase (acetyl-transferring)] kinase isozyme 2, mitochondrial | Q9JK42     |
| Pdk3    | -0.0106                          | 0.51            | 0.27          | -0.15           | 0.57          | 0.00            | 0.79          | 0.35            | 0.66          | [Pyruvate dehydrogenase (acetyl-transferring)] kinase isozyme 3, mitochondrial | Q922H2     |
| Pdlim5  | -7.1519                          | 6.04            | <u>0.0280</u> | -0.59           | 0.051         | 5.39            | 0.12          | 5.45            | 0.11          | ENH isoform 1d                                                                 | D9J301     |

Table S2: Differentially expressed proteins in cerebral cortex (*continued*)

| gene    | $\pi_{TW/EW} \times \pi_{TF/TW}$ | log2FC<br>TW/EW | padj<br>TW/EW | log2FC<br>TF/TW | padj<br>TF/TW | log2FC<br>EF/EW | padj<br>EF/EW | log2FC<br>TF/EW | padj<br>TF/EW | description                                                   | accession  |
|---------|----------------------------------|-----------------|---------------|-----------------|---------------|-----------------|---------------|-----------------|---------------|---------------------------------------------------------------|------------|
| Pdpk1   | 0.0000                           | -0.12           | 0.98          | 0.09            | 0.93          | 0.10            | 0.27          | -0.03           | 0.88          | 3-phosphoinositide-dependent protein kinase 1                 | F2Z3X6     |
| Pdxdc1  | 0.0034                           | -0.33           | 0.42          | -0.34           | 0.83          | 0.01            | 0.86          | -0.67           | 0.23          | Pyridoxal-dependent decarboxylase domain-containing protein 1 | A0A0R4J034 |
| Pdxk    | -0.0035                          | -0.41           | <u>0.0270</u> | 0.09            | 0.87          | -0.22           | 0.26          | -0.31           | 0.065         | Pyridoxal kinase                                              | Q8K183     |
| Pdxdp   | 0.0000                           | -0.16           | 0.41          | 0.00            | 1             | -0.88           | 0.65          | -0.16           | 0.51          | Pyridoxal phosphate phosphatase                               | P60487     |
| Pebp1   | -0.0157                          | 0.14            | 0.61          | -0.68           | 0.17          | -0.15           | 0.94          | -0.53           | 0.17          | Phosphatidylethanolamine-binding protein 1                    | P70296     |
| Pelo    | 0.0000                           | -0.20           | 0.63          | -0.03           | 0.98          | 0.26            | 0.67          | -0.23           | 0.57          | Protein pelota homolog                                        | Q80X73     |
| Pfdn1   | -0.0035                          | -0.20           | 0.35          | 0.14            | 0.53          | -0.15           | 0.37          | -0.06           | 0.69          | Prefoldin 1                                                   | Q9CQF7     |
| Pfdn2   | -0.0033                          | -0.45           | <u>0.0040</u> | 0.17            | 0.96          | -0.07           | 0.92          | -0.28           | 0.14          | Prefoldin subunit 2                                           | O70591     |
| Pfdn4   | -0.1808                          | -0.53           | <u>0.0280</u> | 0.17            | 0.051         | 0.13            | 0.43          | -0.36           | 0.055         | Prefoldin 4                                                   | Q6P0X1     |
| Pfkl    | 0.0021                           | 0.04            | 0.78          | 0.38            | 0.056         | 0.13            | 0.76          | 0.42            | 0.068         | ATP-dependent 6-phosphofructokinase, liver type               | P12382     |
| Pfkm    | 0.0092                           | 0.53            | <u>0.0170</u> | 0.44            | 0.95          | 0.46            | 0.14          | 0.97            | <u>0.0005</u> | ATP-dependent 6-phosphofructokinase, muscle type              | P47857     |
| Pfkp    | -0.1094                          | 0.37            | <u>0.0001</u> | -0.13           | 0.27          | 0.10            | 0.28          | 0.25            | <u>0.0004</u> | ATP-dependent 6-phosphofructokinase                           | Q8C605     |
| Pfn1    | 0.0203                           | -0.23           | 0.071         | -0.21           | 0.43          | -0.58           | <u>0.0390</u> | -0.44           | <u>0.0270</u> | Profilin-1                                                    | P62962     |
| Pfn2    | -1.0014                          | 0.44            | 0.083         | -0.67           | <u>0.0007</u> | 0.16            | 0.56          | -0.23           | 0.32          | Profilin-2                                                    | Q9JJV2     |
| Pgam1   | -0.0002                          | -0.30           | 0.99          | 0.28            | 0.32          | 0.22            | 0.73          | -0.02           | 0.99          | Phosphoglycerate mutase 1                                     | Q9DBJ1     |
| Pgam5   | -0.0066                          | 0.42            | <u>0.0029</u> | -0.04           | 0.7           | 0.39            | 0.15          | 0.37            | 0.23          | Serine/threonine-protein phosphatase PGAM5, mitochondrial     | Q8BX10     |
| Pgap1   | -0.0660                          | 1.18            | 0.14          | -0.35           | 0.65          | 0.61            | 0.14          | 0.83            | 0.24          | GPI inositol-deacylase                                        | Q3UUQ7     |
| Pgbd5   | -0.9667                          | 0.66            | 0.075         | -0.83           | <u>0.0270</u> | -0.09           | 0.94          | -0.17           | 0.67          | PiggyBac transposable element-derived protein 5               | D3YZI9     |
| Pgd     | -0.0364                          | -0.22           | 0.62          | 1.25            | 0.23          | 0.47            | 0.7           | 1.04            | 0.39          | 6-phosphogluconate dehydrogenase, decarboxylating             | Q9DCD0     |
| Pgk1    | 0.0253                           | -0.50           | <u>0.0003</u> | -0.12           | 0.76          | -0.36           | 0.08          | -0.62           | <u>0.0003</u> | Phosphoglycerate kinase 1                                     | P09411     |
| Pgls    | -0.0081                          | 0.25            | 0.69          | -0.65           | 0.49          | -0.70           | 0.46          | -0.39           | 0.66          | 6-phosphogluconolactonase                                     | Q9CQ60     |
| Pgm1    | -0.0153                          | -0.58           | <u>0.0280</u> | 0.11            | 0.7           | -0.48           | 0.055         | -0.47           | <u>0.0280</u> | Phosphoglucomutase-1                                          | Q9D0F9     |
| Pgm2l1  | 0.0022                           | -0.10           | 0.65          | -0.15           | 0.17          | -0.12           | 0.34          | -0.25           | 0.12          | Glucose 1,6-bisphosphate synthase                             | Q8CAA7     |
| Pgp     | 0.0121                           | -0.27           | <u>0.0190</u> | -0.10           | 0.55          | -0.43           | <u>0.0150</u> | -0.37           | <u>0.0200</u> | Glycerol-3-phosphate phosphatase                              | Q8CHP8     |
| Pgrmc1  | 0.0001                           | -0.26           | 0.7           | -0.11           | 0.96          | 0.03            | 0.48          | -0.37           | 0.68          | Membrane-associated progesterone receptor component 1         | O55022     |
| Pgrmc2  | -0.0150                          | -0.45           | <u>0.0010</u> | 0.05            | 0.6           | -0.37           | 0.13          | -0.40           | <u>0.0010</u> | Membrane-associated progesterone receptor component 2         | Q80UU9     |
| Phactr1 | -0.1444                          | 0.65            | 0.14          | -0.75           | 0.45          | 0.06            | 0.67          | -0.10           | 0.23          | Phosphatase and actin regulator 1                             | Q2M3X8     |
| Phb     | -0.0001                          | -0.02           | 0.7           | 0.28            | 0.75          | -0.18           | 0.22          | 0.26            | 0.96          | Prohibitin                                                    | P67778     |
| Phb2    | 0.0009                           | 0.04            | 0.65          | 0.17            | 0.18          | 0.03            | 0.88          | 0.21            | 0.38          | Prohibitin-2                                                  | O35129     |

Table S2: Differentially expressed proteins in cerebral cortex (*continued*)

| gene    | $\pi_{TW/EW} \times \pi_{TF/TW}$ | log2FC<br>TW/EW | padj<br>TW/EW | log2FC<br>TF/TW | padj<br>TF/TW | log2FC<br>EF/EW | padj<br>EF/EW | log2FC<br>TF/EW | padj<br>TF/EW | description                                                       | accession |
|---------|----------------------------------|-----------------|---------------|-----------------|---------------|-----------------|---------------|-----------------|---------------|-------------------------------------------------------------------|-----------|
| Phf24   | -0.0041                          | 0.10            | 0.76          | -0.39           | 0.13          | 0.08            | 0.73          | -0.29           | 0.2           | PHD finger protein 24                                             | Q80TL4    |
| Phgdh   | -0.0044                          | -0.06           | 0.9           | 0.45            | <u>0.0003</u> | -0.12           | 0.53          | 0.40            | <u>0.0008</u> | D-3-phosphoglycerate dehydrogenase                                | Q61753    |
| Phyhip  | -0.0010                          | -0.03           | 0.83          | 0.33            | 0.054         | -0.90           | 0.24          | 0.30            | 0.053         | Phytanoyl-CoA hydroxylase-interacting protein                     | Q8K0S0    |
| Pi4ka   | -0.0188                          | 0.36            | <u>0.0010</u> | -0.01           | <u>0.0180</u> | -0.03           | 0.67          | 0.35            | 0.53          | Phosphatidylinositol 4-kinase alpha                               | E9Q3L2    |
| Picalm  | 0.0554                           | 0.15            | 0.18          | 0.56            | 0.13          | -0.04           | 0.91          | 0.71            | <u>0.0070</u> | Phosphatidylinositol-binding clathrin assembly protein            | Q7M6Y3    |
| Pick1   | 0.0077                           | 0.55            | 0.88          | 0.51            | 0.32          | 0.85            | 0.59          | 1.05            | 0.41          | PRKCA-binding protein                                             | E9PUZ5    |
| Pigs    | 0.0630                           | 0.16            | 0.43          | 0.82            | <u>0.0490</u> | -0.29           | 0.74          | 0.98            | <u>0.0280</u> | GPI transamidase component PIG-S                                  | Q6PD26    |
| Pik3c3  | 0.0091                           | 0.50            | 0.54          | 0.35            | 0.64          | 0.03            | 0.95          | 0.85            | 0.16          | Phosphatidylinositol 3-kinase catalytic subunit type 3            | E9QLS6    |
| Pik3r1  | -0.0001                          | 0.08            | 0.86          | -0.17           | 0.75          | -0.13           | 0.92          | -0.10           | 0.83          | Phosphatidylinositol 3-kinase regulatory subunit alpha            | P26450    |
| Pik3r4  | -0.3432                          | 1.32            | <u>0.0010</u> | -0.18           | 0.33          | -0.50           | 0.66          | 1.15            | <u>0.0025</u> | Phosphoinositide 3-kinase regulatory subunit 4                    | Q8VD65    |
| Pin1    | 0.0001                           | -0.10           | 0.37          | -0.08           | 0.93          | -0.08           | 0.95          | -0.17           | 0.15          | Peptidyl-prolyl cis-trans isomerase NIMA-interacting 1            | Q9QUR7    |
| Pip4k2b | -0.0009                          | -0.09           | 0.44          | 0.05            | 0.27          | 0.21            | 0.75          | -0.04           | 0.68          | Phosphatidylinositol 5-phosphate 4-kinase type-2 beta             | Q80XI4    |
| Pip4k2c | -0.0022                          | -0.05           | 0.39          | 0.36            | 0.5           | -0.08           | 0.66          | 0.31            | 0.12          | Phosphatidylinositol 5-phosphate 4-kinase type-2 gamma            | Q91XU3    |
| Pip5k1c | -0.2701                          | 0.55            | 0.14          | -0.60           | 0.11          | 0.07            | 0.67          | -0.05           | 0.9           | Phosphatidylinositol 4-phosphate 5-kinase type-1 gamma            | F8WHW6    |
| Pisd    | -0.7485                          | 0.67            | 0.097         | -0.71           | <u>0.0280</u> | -0.23           | 0.36          | -0.05           | 0.69          | Phosphatidylserine decarboxylase proenzyme, mitochondrial         | E9PX91    |
| Pithd1  | 0.0001                           | 0.27            | 0.58          | 0.04            | 0.93          | -0.02           | 0.8           | 0.31            | 0.53          | PITH domain-containing protein 1                                  | Q8BWR2    |
| Pitpnm1 | -0.2051                          | 0.50            | 0.22          | -0.58           | 0.084         | -0.54           | 0.13          | -0.08           | 0.4           | Membrane-associated phosphatidylinositol transfer protein 1       | O35954    |
| Pitpnm2 | -1.8536                          | 1.61            | <u>0.0430</u> | -1.32           | 0.23          | -0.01           | 0.5           | 0.29            | 0.26          | Membrane-associated phosphatidylinositol transfer protein 2       | Q6ZPQ6    |
| Pitrm1  | -0.1881                          | 0.42            | <u>0.0190</u> | -0.25           | 0.091         | 0.16            | 0.53          | 0.17            | 0.44          | Presequence protease, mitochondrial                               | Q8K411    |
| Pkm     | -0.0009                          | -0.24           | 0.6           | 0.02            | 0.14          | -0.13           | 0.25          | -0.22           | 0.38          | Pyruvate kinase PKM                                               | P52480    |
| Pkp2    | -0.1003                          | 0.88            | 0.64          | -1.40           | 0.38          | -0.39           | 0.58          | -0.53           | 0.44          | Plakophilin 2                                                     | Q9CQ73    |
| Pkp4    | -37.0053                         | 2.31            | <u>0.0120</u> | -2.78           | <u>0.0010</u> | 0.15            | 0.94          | -0.47           | 0.23          | Plakophilin-4                                                     | Q68FH0    |
| Plaa    | -0.0015                          | 0.11            | 0.81          | -0.33           | 0.36          | -0.14           | 0.83          | -0.21           | 0.69          | Phospholipase A-2-activating protein                              | P27612    |
| Plcb1   | 0.0000                           | -0.02           | 0.91          | -0.01           | 0.93          | 0.08            | 0.55          | -0.03           | 0.9           | 1-phosphatidylinositol 4,5-bisphosphate phosphodiesterase beta-1  | Q9Z1B3    |
| Plcg1   | 0.0003                           | 0.59            | 0.39          | 0.01            | 0.72          | 0.25            | 0.35          | 0.60            | <u>0.0440</u> | 1-phosphatidylinositol 4,5-bisphosphate phosphodiesterase gamma-1 | Q62077    |

Table S2: Differentially expressed proteins in cerebral cortex (*continued*)

| gene    | $\pi_{TW/EW} \times \pi_{TF/TW}$ | log2FC<br>TW/EW | padj<br>TW/EW | log2FC<br>TF/TW | padj<br>TF/TW | log2FC<br>EF/EW | padj<br>EF/EW | log2FC<br>TF/EW | padj<br>TF/EW | description                                                         | accession  |
|---------|----------------------------------|-----------------|---------------|-----------------|---------------|-----------------|---------------|-----------------|---------------|---------------------------------------------------------------------|------------|
| Plch2   | 0.0001                           | -0.03           | 0.79          | -0.34           | 0.88          | -0.13           | 0.93          | -0.37           | 0.76          | 1-phosphatidylinositol 4,5-bisphosphate phosphodiesterase eta-2     | A2AP18     |
| Plcl2   | -0.0066                          | 0.18            | 0.7           | -0.37           | 0.23          | 0.02            | 0.89          | -0.20           | 0.28          | Inactive phospholipase C-like protein 2                             | Q8K394     |
| Plcxd2  | -0.8156                          | -3.62           | 0.5           | 3.73            | 0.63          | 0.89            | 0.73          | 0.11            | 1             | PI-PLC X domain-containing protein 2                                | B2RXA1     |
| Pld3    | 0.0096                           | 0.13            | 0.5           | 0.71            | 0.45          | 0.29            | 0.66          | 0.83            | 0.19          | 5'-3' exonuclease PLD3                                              | O35405     |
| Plec    | -36.1200                         | 1.29            | <u>0.0001</u> | -1.75           | <u>0.0001</u> | 0.57            | <u>0.0001</u> | -0.46           | <u>0.0016</u> | Plectin                                                             | E9Q3W4     |
| Plekha5 | -2.3325                          | 1.88            | 0.45          | -4.19           | 0.14          | -1.52           | 0.33          | -2.30           | 0.21          | Pleckstrin homology domain-containing, family A member 5 (Fragment) | A0A0N4SWD7 |
| Plekha6 | -13.5100                         | 4.97            | 0.34          | -9.09           | 0.23          | 4.03            | 0.24          | -4.12           | 0.43          | Pleckstrin homology domain-containing family A member 6             | A0A087WRB7 |
| Plekhl1 | 0.0000                           | 0.34            | 0.84          | -0.05           | 0.94          | 0.09            | 0.64          | 0.29            | 0.72          | Pleckstrin homology domain-containing family M member 1             | Q7TSI1     |
| Plg     | 0.0007                           | -0.67           | 0.55          | -0.02           | 0.65          | 0.42            | 0.65          | -0.69           | 0.53          | Plasminogen                                                         | P20918     |
| Plin4   | -0.0001                          | 0.05            | 0.96          | -0.30           | 0.41          | -0.22           | 0.66          | -0.25           | 0.42          | Perilipin-4                                                         | A0A571BEC9 |
| Plp1    | 0.3467                           | -0.28           | 0.27          | -0.55           | <u>0.0001</u> | -0.34           | <u>0.0410</u> | -0.82           | <u>0.0001</u> | Myelin proteolipid protein                                          | P60202     |
| Plpbbp  | -0.0011                          | -0.04           | 0.48          | 0.12            | 0.18          | -0.08           | 0.27          | 0.07            | 0.45          | Pyridoxal phosphate homeostasis protein (Fragment)                  | A0A1B0GRP7 |
| Plpp3   | 0.0000                           | -0.18           | 1             | 0.06            | 0.78          | 0.11            | 0.94          | -0.12           | 0.77          | Phospholipid phosphatase 3                                          | Q99JY8     |
| Plppr3  | 0.0000                           | 0.01            | 0.96          | -0.25           | 0.71          | -0.17           | 0.88          | -0.24           | 0.71          | Phospholipid phosphatase-related protein type 3                     | A0A0R3P9D0 |
| Plppr4  | -0.4023                          | 0.42            | 0.052         | -0.45           | <u>0.0220</u> | -0.09           | 0.9           | -0.03           | 0.94          | 2-lysophosphatidate phosphatase PLPPR4 (Fragment)                   | A0A0G2JGY9 |
| Pls3    | 0.1383                           | -0.65           | 0.079         | -0.33           | 0.26          | -0.94           | 0.084         | -0.99           | <u>0.0280</u> | Plastin-3                                                           | B1AX58     |
| Plxna1  | -0.0055                          | -0.04           | 0.83          | 0.63            | <u>0.0020</u> | -0.30           | 0.24          | 0.59            | <u>0.0007</u> | Plexin-A1                                                           | P70206     |
| Plxna4  | -0.0385                          | -0.26           | 0.15          | 0.44            | 0.39          | -0.25           | 0.23          | 0.18            | 0.64          | Plexin-A4                                                           | Q80UG2     |
| Plxnb1  | -0.0388                          | -0.20           | 0.4           | 0.44            | 0.078         | 0.25            | 0.31          | 0.25            | 0.33          | Plexin-B1                                                           | Q8CJH3     |
| Plxnb2  | 0.1308                           | -0.61           | 0.36          | -0.85           | 0.27          | -0.20           | 0.61          | -1.45           | 0.12          | Plexin-B2                                                           | B2RXS4     |
| Plxnc1  | -0.0881                          | -0.23           | 0.14          | 0.34            | <u>0.0480</u> | -0.41           | 0.25          | 0.11            | 0.33          | Plexin-C1                                                           | Q9QZC2     |
| Plxnd1  | -0.0259                          | -0.37           | 0.16          | 0.31            | 0.52          | -0.15           | 0.32          | -0.06           | 0.88          | Plexin-D1                                                           | Q3UH93     |
| Pmm1    | 0.1088                           | -0.35           | 0.78          | -4.65           | 0.24          | -3.54           | 0.57          | -5.00           | 0.25          | Phosphomannomutase 1                                                | O35621     |
| Pmpca   | -0.0045                          | -0.49           | 0.17          | 0.11            | 0.78          | -0.08           | 0.98          | -0.39           | 0.072         | Mitochondrial-processing peptidase subunit alpha                    | Q9DC61     |
| Pmpcb   | 0.0000                           | -0.01           | 0.95          | 0.03            | 0.83          | -0.21           | 0.8           | 0.02            | 0.83          | Mitochondrial-processing peptidase subunit beta                     | Q9CXT8     |
| Pnn     | -0.0023                          | -0.33           | 0.81          | 0.50            | 0.7           | -0.41           | 0.37          | 0.17            | 0.63          | Pinin                                                               | Q3TUQ5     |
| Pnpla8  | 0.0123                           | 0.09            | 0.46          | 0.25            | <u>0.0240</u> | 0.19            | 0.97          | 0.34            | <u>0.0008</u> | Calcium-independent phospholipase A2-gamma                          | Q8K1N1     |
| Pnpt1   | 0.0523                           | 0.12            | 0.15          | 0.39            | <u>0.0440</u> | 0.29            | 0.12          | 0.50            | <u>0.0007</u> | Polyribonucleotide nucleotidyltransferase 1, mitochondrial          | Q8K1R3     |

Table S2: Differentially expressed proteins in cerebral cortex (*continued*)

| gene     | $\pi_{TW/EW} \times \pi_{TF/TW}$ | log2FC<br>TW/EW | padj<br>TW/EW | log2FC<br>TF/TW | padj<br>TF/TW | log2FC<br>EF/EW | padj<br>EF/EW | log2FC<br>TF/EW | padj<br>TF/EW | description                                                                      | accession  |
|----------|----------------------------------|-----------------|---------------|-----------------|---------------|-----------------|---------------|-----------------|---------------|----------------------------------------------------------------------------------|------------|
| Podn     | 0.0115                           | -0.19           | 0.72          | -1.33           | 0.48          | -1.49           | 0.054         | -1.51           | 0.16          | Podn protein (Fragment)                                                          | Q6P3D8     |
| Poglut1  | 0.0001                           | 0.05            | 0.34          | 0.03            | 0.68          | 0.29            | 0.3           | 0.08            | 0.71          | Protein O-glucosyltransferase 1                                                  | Q8BYB9     |
| Poldip3  | -1.0026                          | 1.09            | <u>0.0390</u> | -0.63           | 0.092         | 0.41            | 0.51          | 0.45            | 0.42          | Polymerase delta-interacting protein 3                                           | Q8BG81     |
| Polr2a   | -0.0026                          | -0.29           | 0.42          | 0.14            | 0.68          | 0.10            | 0.85          | -0.15           | 0.57          | DNA-directed RNA polymerase subunit                                              | A0A0R4J0V5 |
| Pomgnt2  | -6.6063                          | 1.13            | <u>0.0010</u> | -0.71           | <u>0.0018</u> | -0.37           | 0.71          | 0.43            | 0.5           | Protein O-linked-mannose<br>beta-1,4-N-acetylglucosaminyltransferase 2           | Q8BW41     |
| Por      | -0.4020                          | 0.64            | 0.17          | -0.66           | 0.058         | -4.54           | <u>0.0330</u> | -0.02           | 0.88          | NADPH-hemoprotein reductase                                                      | Q05DV1     |
| Ppa1     | -0.0002                          | -0.19           | 0.71          | 0.13            | 0.91          | 0.00            | 0.84          | -0.06           | 0.8           | Inorganic pyrophosphatase                                                        | Q9D819     |
| Ppfia1   | -3.4624                          | 3.36            | 0.41          | -4.68           | 0.27          | -1.24           | 0.56          | -1.32           | 0.5           | Ppfia1 protein                                                                   | B2RXQ2     |
| Ppfia2   | -2.3608                          | 0.90            | 0.34          | -2.67           | <u>0.0080</u> | -0.65           | 0.45          | -1.77           | <u>0.0200</u> | Liprin-alpha-2                                                                   | B8QI34     |
| Ppfia3   | -0.1592                          | 0.38            | 0.24          | -0.61           | 0.078         | -0.20           | 0.52          | -0.23           | 0.69          | Liprin-alpha-3                                                                   | P60469     |
| Ppfia4   | 0.0000                           | 0.12            | 0.89          | -0.02           | 0.88          | -0.34           | 0.51          | 0.09            | 0.83          | Liprin-alpha 4                                                                   | B8QI36     |
| Ppia     | -0.0191                          | 0.05            | 0.45          | -0.46           | <u>0.0040</u> | -0.30           | 0.086         | -0.41           | <u>0.0250</u> | Peptidyl-prolyl cis-trans isomerase A                                            | P17742     |
| Ppid     | 0.0006                           | -0.23           | 0.92          | -0.14           | 0.29          | -0.06           | 0.67          | -0.37           | 0.26          | Peptidyl-prolyl cis-trans isomerase D                                            | Q9CR16     |
| Ppif     | 0.0027                           | -0.22           | 0.93          | -0.60           | 0.22          | -0.19           | 0.76          | -0.83           | 0.24          | Peptidyl-prolyl cis-trans isomerase F,<br>mitochondrial                          | Q99KR7     |
| Ppip5k1  | 0.0003                           | 0.27            | 0.45          | 0.05            | 0.87          | 0.04            | 0.92          | 0.32            | 0.28          | Inositol hexakisphosphate and<br>diphosphoinositol-pentakisphosphate<br>kinase 1 | A2ARP1     |
| Ppm1a    | 0.0000                           | 0.17            | 0.9           | -0.07           | 0.81          | 0.59            | 0.53          | 0.10            | 0.7           | Protein phosphatase 1A                                                           | P49443     |
| Ppm1b    | 0.0003                           | -0.20           | 0.33          | -0.06           | 0.87          | 0.16            | 0.63          | -0.26           | 0.35          | Protein-serine/threonine phosphatase                                             | Q99NF7     |
| Ppm1e    | 0.0340                           | -0.72           | 0.13          | -0.24           | 0.6           | -0.36           | 0.21          | -0.96           | 0.055         | Protein phosphatase 1E                                                           | Q80TL0     |
| Ppm1f    | -0.0141                          | -0.21           | 0.21          | 0.23            | 0.37          | -0.21           | 0.21          | 0.02            | 0.91          | Protein phosphatase 1F                                                           | Q8CGA0     |
| Ppm1g    | -0.1793                          | -0.24           | 0.32          | 0.72            | <u>0.0080</u> | -0.12           | 0.84          | 0.48            | 0.051         | Protein phosphatase 1G                                                           | A0A0J9YVG0 |
| Ppm1h    | -0.0183                          | 0.17            | 0.41          | -0.29           | 0.11          | 0.31            | 0.2           | -0.12           | 0.61          | Protein phosphatase 1H                                                           | Q3UYC0     |
| Ppme1    | 0.0007                           | -0.26           | 0.94          | -0.21           | 0.31          | -0.28           | 0.091         | -0.47           | 0.21          | Protein phosphatase methylesterase 1                                             | Q8BVQ5     |
| Ppp1ca   | -0.0469                          | 0.31            | 0.44          | -0.57           | 0.18          | -0.01           | 0.7           | -0.26           | 0.77          | Serine/threonine-protein phosphatase<br>PP1-alpha catalytic subunit              | P62137     |
| Ppp1cc   | 0.0099                           | -0.72           | 0.2           | -0.15           | 0.74          | 0.01            | 0.96          | -0.87           | 0.061         | Serine/threonine-protein phosphatase<br>(Fragment)                               | A0A0G2JFF1 |
| Ppp1r12a | -0.0754                          | 0.73            | 0.31          | -0.47           | 0.37          | 0.61            | 0.28          | 0.26            | 0.88          | Protein phosphatase 1 regulatory subunit<br>12A                                  | Q9DBR7     |
| Ppp1r12c | -0.0829                          | 1.13            | 0.092         | -0.21           | 0.46          | 0.70            | 0.28          | 0.93            | 0.16          | Protein phosphatase 1 regulatory subunit<br>12C                                  | Q3UMT1     |
| Ppp1r13b | -0.4346                          | 0.69            | <u>0.0280</u> | -0.32           | 0.054         | -0.11           | 0.67          | 0.37            | 0.15          | Apoptosis-stimulating of p53 protein 1<br>(Fragment)                             | A0A1Y7VJH3 |
| Ppp1r1b  | -0.0147                          | -0.66           | 0.75          | 0.73            | 0.57          | 0.30            | 0.73          | 0.07            | 0.93          | Protein phosphatase 1 regulatory subunit<br>1B                                   | Q60829     |



Table S2: Differentially expressed proteins in cerebral cortex (*continued*)

| gene    | $\pi_{TW/EW} \times \pi_{TF/TW}$ | log2FC<br>TW/EW | padj<br>TW/EW | log2FC<br>TF/TW | padj<br>TF/TW | log2FC<br>EF/EW | padj<br>EF/EW | log2FC<br>TF/EW | padj<br>TF/EW | description                                                                       | accession  |
|---------|----------------------------------|-----------------|---------------|-----------------|---------------|-----------------|---------------|-----------------|---------------|-----------------------------------------------------------------------------------|------------|
| Ppp1r21 | -0.0001                          | -0.14           | 0.42          | 0.10            | 0.97          | -0.05           | 0.86          | -0.03           | 0.56          | Protein phosphatase 1 regulatory subunit 21                                       | Q3TDD9     |
| Ppp1r7  | -0.0109                          | -0.40           | <u>0.0030</u> | 0.06            | 0.66          | -0.09           | 0.42          | -0.34           | <u>0.0200</u> | Protein phosphatase 1 regulatory subunit 7                                        | Q3UM45     |
| Ppp1r9a | -1.9345                          | 0.59            | 0.14          | -1.28           | <u>0.0010</u> | 0.81            | 0.1           | -0.70           | 0.085         | Protein phosphatase 1, regulatory subunit 9A                                      | H3BJD6     |
| Ppp1r9b | -9.3231                          | 1.11            | <u>0.0130</u> | -1.65           | <u>0.0020</u> | 0.96            | <u>0.0390</u> | -0.54           | 0.72          | Neurabin-2                                                                        | Q6R891     |
| Ppp2ca  | -0.0897                          | -0.37           | <u>0.0140</u> | 0.17            | 0.17          | 0.02            | 0.95          | -0.20           | 0.087         | Serine/threonine-protein phosphatase 2A catalytic subunit alpha isoform           | P63330     |
| Ppp2r1a | -0.1118                          | -0.30           | 0.059         | 0.23            | <u>0.0480</u> | 0.16            | 0.95          | -0.07           | 0.82          | Serine/threonine-protein phosphatase 2A 65 kDa regulatory subunit A alpha isoform | Q76MZ3     |
| Ppp2r2a | -0.0436                          | 0.49            | 0.069         | -0.27           | 0.52          | -0.12           | 0.99          | 0.22            | 0.59          | Serine/threonine-protein phosphatase 2A 55 kDa regulatory subunit B alpha isoform | Q6P1F6     |
| Ppp2r5a | 0.0560                           | -0.28           | 0.41          | -1.23           | 0.38          | 0.04            | 0.98          | -1.51           | 0.11          | Serine/threonine-protein phosphatase 2A 56 kDa regulatory subunit alpha isoform   | Q6PD03     |
| Ppp2r5b | -0.0008                          | 0.05            | 0.88          | -0.51           | 0.28          | 0.08            | 0.81          | -0.46           | 0.29          | Serine/threonine-protein phosphatase 2A 56 kDa regulatory subunit beta isoform    | Q6PD28     |
| Ppp2r5c | 0.0000                           | 0.17            | 1             | -0.14           | 0.98          | -0.91           | 0.12          | 0.03            | 0.89          | Serine/threonine-protein phosphatase 2A 56 kDa regulatory subunit gamma isoform   | Q60996     |
| Ppp2r5d | 0.0429                           | -0.66           | 0.41          | -0.33           | 0.31          | -0.12           | 0.66          | -0.99           | 0.088         | Serine/threonine-protein phosphatase 2A 56 kDa regulatory subunit                 | Q7TNL5     |
| Ppp2r5e | 0.0220                           | -0.09           | 0.47          | -0.46           | <u>0.0240</u> | -0.34           | <u>0.0310</u> | -0.55           | <u>0.0011</u> | Serine/threonine-protein phosphatase 2A 56 kDa regulatory subunit                 | Q3UZJ4     |
| Ppp3ca  | 0.0000                           | -0.15           | 0.95          | 0.03            | 0.57          | 0.03            | 0.65          | -0.13           | 0.56          | Serine/threonine-protein phosphatase 2B catalytic subunit alpha isoform           | P63328     |
| Ppp5c   | -0.5650                          | -0.66           | <u>0.0011</u> | 0.44            | 0.22          | -0.42           | 0.16          | -0.22           | 0.54          | Serine/threonine-protein phosphatase (Fragment)                                   | F7BX26     |
| Ppp6c   | 0.0001                           | 0.15            | 0.77          | 0.10            | 0.93          | 0.61            | 0.23          | 0.25            | 0.65          | Serine/threonine-protein phosphatase                                              | A0A0N4SVL9 |
| Ppt1    | 0.0000                           | -0.07           | 0.72          | 0.01            | 1             | 0.17            | 0.17          | -0.06           | 0.73          | Palmitoyl-protein thioesterase 1                                                  | O88531     |
| Praf2   | 0.0007                           | 0.14            | 0.49          | 0.08            | 0.63          | -0.84           | 0.24          | 0.23            | 0.22          | PRA1 family protein 2                                                             | Q9JIG8     |
| Prdx1   | 0.0001                           | 0.03            | 0.54          | 0.12            | 0.77          | 0.27            | 0.33          | 0.15            | 0.68          | Peroxisredoxin-1 (Fragment)                                                       | B1AXW5     |
| Prdx2   | 0.0000                           | 0.07            | 0.42          | 0.08            | 0.97          | 0.19            | 0.38          | 0.15            | 0.41          | Peroxisredoxin-2                                                                  | Q61171     |
| Prdx3   | 0.0008                           | -0.15           | 0.7           | -0.08           | 0.38          | -0.03           | 0.74          | -0.23           | 0.24          | Thioredoxin-dependent peroxide reductase, mitochondrial                           | P20108     |
| Prdx5   | -0.0153                          | 0.10            | 0.26          | -0.18           | <u>0.0350</u> | -0.07           | 0.089         | -0.09           | 0.23          | Peroxisredoxin-5                                                                  | H3BJQ7     |
| Prdx6   | -0.0491                          | -0.51           | <u>0.0010</u> | 0.09            | 0.44          | -1.07           | <u>0.0004</u> | -0.43           | 0.062         | Peroxisredoxin-6                                                                  | D3Z0Y2     |
| Preb    | -3.0469                          | 2.20            | 0.094         | -1.87           | 0.19          | 0.14            | 0.84          | 0.33            | 0.56          | Prolactin regulatory element-binding protein                                      | D3Z3S1     |
| Prepl   | -0.0207                          | 0.24            | 0.61          | -0.79           | 0.31          | -1.40           | 0.34          | -0.55           | 0.6           | Prolyl endopeptidase-like                                                         | Q8C167     |

Table S2: Differentially expressed proteins in cerebral cortex (*continued*)

| gene     | $\pi_{TW/EW} \times \pi_{TF/TW}$ | log2FC<br>TW/EW | padj<br>TW/EW | log2FC<br>TF/TW | padj<br>TF/TW | log2FC<br>EF/EW | padj<br>EF/EW | log2FC<br>TF/EW | padj<br>TF/EW | description                                                                | accession  |
|----------|----------------------------------|-----------------|---------------|-----------------|---------------|-----------------|---------------|-----------------|---------------|----------------------------------------------------------------------------|------------|
| Prex1    | -0.0001                          | 0.14            | 0.64          | -0.05           | 0.87          | -0.22           | 0.56          | 0.08            | 0.83          | Phosphatidylinositol 3,4,5-trisphosphate-dependent Rac exchanger 1 protein | Q69ZK0     |
| Prickle2 | -0.4340                          | 1.01            | 0.38          | -1.65           | 0.24          | -0.87           | 0.24          | -0.64           | 0.6           | Prickle-like 2 (Drosophila)                                                | A7YQ68     |
| Prkaa1   | 0.0119                           | -0.30           | 0.65          | -3.25           | 0.86          | -3.37           | 0.56          | -3.55           | 0.69          | Acetyl-CoA carboxylase kinase                                              | Q3TUQ7     |
| Prkacb   | 0.0034                           | -0.12           | 0.38          | -0.16           | 0.38          | 0.45            | 0.11          | -0.28           | 0.17          | cAMP-dependent protein kinase catalytic subunit beta                       | P68181     |
| Prkar1a  | 0.0017                           | -0.08           | 0.7           | -0.21           | 0.22          | 0.17            | 0.29          | -0.29           | <u>0.0490</u> | cAMP-dependent protein kinase type I-alpha regulatory subunit              | Q9DBC7     |
| Prkar2a  | 0.0001                           | 0.03            | 0.48          | 0.13            | 0.9           | -0.14           | 0.48          | 0.15            | 0.6           | Protein kinase, cAMP dependent regulatory, type II alpha                   | Q8K1M3     |
| Prkar2b  | 0.0000                           | -0.21           | 0.52          | 0.15            | 0.99          | 0.21            | 0.98          | -0.06           | 0.64          | cAMP-dependent protein kinase type II-beta regulatory subunit              | P31324     |
| Prkca    | -0.1633                          | 0.81            | 0.35          | -0.97           | 0.35          | -0.35           | 0.23          | -0.17           | 0.52          | Protein kinase C alpha type                                                | P20444     |
| Prkcb    | -0.3128                          | 0.22            | 0.2           | -0.67           | <u>0.0009</u> | -0.40           | <u>0.0080</u> | -0.45           | <u>0.0004</u> | Protein kinase C beta type                                                 | P68404     |
| Prkcg    | -0.4657                          | 0.21            | 0.31          | -1.09           | <u>0.0001</u> | -0.49           | <u>0.0001</u> | -0.88           | <u>0.0001</u> | Protein kinase C gamma type                                                | P63318     |
| Prkcsh   | 0.0000                           | -0.09           | 0.71          | 0.02            | 0.98          | 0.51            | 0.11          | -0.07           | 0.8           | Glucosidase 2 subunit beta                                                 | O08795     |
| Prkg2    | 0.0007                           | -0.02           | 0.9           | -0.45           | <u>0.0210</u> | -0.13           | 0.44          | -0.46           | <u>0.0050</u> | cGMP-dependent protein kinase                                              | E9QPH0     |
| Prmt1    | -0.0007                          | -0.25           | 0.45          | 0.05            | 0.7           | 0.12            | 0.94          | -0.20           | 0.87          | Protein arginine N-methyltransferase 1                                     | A0A171KXD3 |
| Prnp     | -0.4128                          | 1.17            | 0.27          | -1.22           | 0.31          | -0.46           | 0.33          | -0.04           | 0.9           | Major prion protein                                                        | P04925     |
| Prpf19   | -0.2999                          | 0.51            | 0.058         | -0.44           | 0.083         | 0.01            | 0.86          | 0.07            | 1             | Pre-mRNA-processing factor 19                                              | Q99KP6     |
| Prpf8    | -0.0032                          | 0.27            | 0.2           | -0.10           | 0.68          | -0.37           | 0.54          | 0.17            | 0.22          | Pre-mRNA-processing-splicing factor 8                                      | Q99PV0     |
| Prps1l3  | -0.0006                          | -0.01           | 0.93          | 0.71            | <u>0.0030</u> | -0.88           | <u>0.0030</u> | 0.69            | <u>0.0010</u> | Ribose-phosphate diphosphokinase                                           | G3UXL2     |
| Prpsap1  | 0.0005                           | 0.64            | 0.28          | 0.17            | 0.98          | 0.04            | 0.73          | 0.81            | 0.086         | Phosphoribosyl pyrophosphate synthase-associated protein 1                 | B1AT82     |
| Prpsap2  | -0.1599                          | -0.37           | 0.17          | 0.61            | 0.12          | -0.34           | 0.14          | 0.24            | 0.42          | Phosphoribosyl pyrophosphate synthase-associated protein 2                 | Q8R574     |
| Prr36    | 0.0005                           | 0.45            | 0.52          | 0.03            | 0.72          | 0.47            | 0.3           | 0.48            | 0.23          | Proline-rich 36                                                            | E9PV26     |
| Prrc2a   | 0.0109                           | 0.18            | 0.42          | 0.23            | 0.2           | -0.06           | 0.87          | 0.42            | 0.15          | Protein PRRC2A                                                             | Q7TSC1     |
| Prrc2c   | -0.5833                          | 0.93            | <u>0.0490</u> | -0.52           | 0.12          | 1.08            | <u>0.0140</u> | 0.40            | 0.52          | Protein PRRC2C                                                             | A0A0A0MQ79 |
| Prrt1    | -0.0001                          | -0.05           | 0.94          | 0.41            | 0.54          | -0.76           | 0.62          | 0.36            | 0.51          | Proline-rich transmembrane protein 1                                       | O35449     |
| Prrt2    | 0.1379                           | 0.86            | 0.14          | 0.22            | 0.14          | 1.45            | <u>0.0050</u> | 1.08            | 0.064         | Proline-rich transmembrane protein 2                                       | E9PUL5     |
| Prrt3    | -3.6121                          | 4.79            | 0.052         | -2.13           | 0.53          | 5.20            | <u>0.0280</u> | 2.65            | 0.16          | Proline-rich transmembrane protein 3                                       | A0A0N4SVB5 |
| Prss1    | -0.0432                          | -0.38           | 0.77          | 1.13            | 0.13          | 0.02            | 0.91          | 0.75            | 0.26          | Protease, serine 1 (trypsin 1)                                             | Q9Z1R9     |
| Prune1   | -6.7153                          | 2.45            | <u>0.0390</u> | -1.92           | 0.097         | 0.56            | 0.49          | 0.53            | 0.66          | Exopolyphosphatase PRUNE1                                                  | Q8BIW1     |
| Psat1    | 0.0057                           | -0.30           | <u>0.0190</u> | -0.04           | 0.53          | -0.18           | 0.11          | -0.34           | <u>0.0010</u> | Phosphoserine aminotransferase                                             | Q99K85     |
| Psd      | -0.0097                          | 0.52            | 0.87          | -1.02           | 0.5           | 0.06            | 0.27          | -0.50           | 0.18          | PH and SEC7 domain-containing protein 1                                    | Q5DTT2     |
| Psd3     | -0.6051                          | 0.65            | 0.17          | -0.99           | 0.06          | 0.16            | 0.88          | -0.34           | 0.55          | PH and SEC7 domain-containing protein 3                                    | E9PUC5     |
| Psmal    | -0.0005                          | -0.11           | 0.74          | 0.23            | 0.73          | 0.18            | 0.36          | 0.12            | 0.58          | Proteasome subunit alpha type-1                                            | Q9R1P4     |

Table S2: Differentially expressed proteins in cerebral cortex (*continued*)

| gene   | $\pi_{TW/EW} \times \pi_{TF/TW}$ | log2FC<br>TW/EW | padj<br>TW/EW | log2FC<br>TF/TW | padj<br>TF/TW | log2FC<br>EF/EW | padj<br>EF/EW | log2FC<br>TF/EW | padj<br>TF/EW | description                                     | accession  |
|--------|----------------------------------|-----------------|---------------|-----------------|---------------|-----------------|---------------|-----------------|---------------|-------------------------------------------------|------------|
| Psma2  | 0.0000                           | 0.13            | 0.42          | 0.32            | 1             | 0.38            | 0.6           | 0.45            | 0.38          | Proteasome subunit alpha type-2                 | P49722     |
| Psma3  | -0.0001                          | -0.23           | 0.96          | 0.27            | 0.84          | 0.07            | 1             | 0.03            | 0.75          | Proteasome subunit alpha type-3                 | O70435     |
| Psma4  | -0.0056                          | -0.23           | 0.29          | 0.11            | 0.39          | 0.17            | <u>0.0430</u> | -0.12           | 0.7           | Proteasome subunit alpha type-4                 | Q9R1P0     |
| Psma5  | -0.0075                          | -0.27           | 0.12          | 0.10            | 0.5           | 0.13            | 0.43          | -0.17           | 0.54          | Proteasome subunit alpha type-5                 | Q9Z2U1     |
| Psma6  | -0.7112                          | -0.38           | <u>0.0004</u> | 0.35            | <u>0.0270</u> | -0.01           | 0.65          | -0.03           | 0.45          | Proteasome subunit alpha type-6                 | Q9QUM9     |
| Psma7  | -0.0060                          | -0.14           | 0.47          | 0.20            | 0.22          | -0.17           | 0.089         | 0.06            | 0.52          | Proteasome subunit alpha type                   | A0A338P7D7 |
| Psmb1  | 0.0009                           | -0.49           | 0.57          | -0.10           | 0.84          | -1.09           | 0.29          | -0.59           | 0.56          | Proteasome subunit beta type-1                  | O09061     |
| Psmb2  | -0.0004                          | -0.65           | <u>0.0280</u> | 0.03            | 0.97          | -0.14           | 0.72          | -0.63           | 0.14          | Proteasome subunit beta type-2                  | Q9R1P3     |
| Psmb4  | -0.2486                          | -0.31           | <u>0.0140</u> | 0.27            | <u>0.0250</u> | 0.14            | 0.22          | -0.04           | 0.61          | Proteasome subunit beta type-4                  | P99026     |
| Psmb5  | -0.1327                          | -0.56           | <u>0.0110</u> | 0.33            | 0.43          | -0.06           | 0.41          | -0.23           | 0.076         | Proteasome subunit beta type-5                  | O55234     |
| Psmb6  | 0.0000                           | -0.23           | 1             | 0.02            | 0.52          | 0.22            | 0.68          | -0.21           | 0.066         | Proteasome subunit beta type-6                  | Q60692     |
| Psmc1  | -0.0024                          | -0.28           | <u>0.0030</u> | 0.04            | 0.82          | 0.04            | 0.69          | -0.24           | 0.087         | 26S proteasome regulatory subunit 4             | P62192     |
| Psmc2  | -0.0251                          | 0.39            | 0.63          | -0.58           | 0.28          | -0.29           | 0.56          | -0.19           | 0.52          | 26S proteasome regulatory subunit 7             | P46471     |
| Psmc3  | 0.0000                           | 0.01            | 0.85          | 0.05            | 0.71          | -0.06           | 0.61          | 0.06            | 0.52          | 26S proteasome regulatory subunit 6A            | A2AGN7     |
| Psmc4  | -0.0004                          | 0.10            | 0.32          | -0.02           | 0.42          | -0.24           | 0.12          | 0.08            | 0.77          | 26S proteasome regulatory subunit 6B            | P54775     |
| Psmc5  | -0.0060                          | 0.05            | 0.78          | -0.68           | <u>0.0230</u> | -0.39           | 0.48          | -0.63           | 0.11          | 26S proteasome regulatory subunit 8             | Q8K1K2     |
| Psmc6  | 0.0010                           | -0.02           | 0.62          | -0.40           | 0.25          | -0.12           | 0.52          | -0.41           | 0.34          | 26S proteasome regulatory subunit 10B           | P62334     |
| Psmc1  | 0.0000                           | -0.01           | 0.46          | 0.09            | 0.85          | 0.11            | 0.58          | 0.08            | 0.5           | 26S proteasome non-ATPase regulatory subunit 1  | Q3TXS7     |
| Psmc11 | -0.0475                          | -0.38           | 0.48          | 0.38            | 0.093         | 0.00            | 0.67          | 0.00            | 0.81          | 26S proteasome non-ATPase regulatory subunit 11 | Q8BG32     |
| Psmc13 | 0.0040                           | -0.34           | 0.52          | -0.15           | 0.53          | -0.03           | 0.99          | -0.49           | 0.13          | 26S proteasome non-ATPase regulatory subunit 13 | Q9WVJ2     |
| Psmc14 | -0.0125                          | -0.26           | 0.58          | 0.30            | 0.21          | -0.05           | 0.59          | 0.04            | 0.6           | 26S proteasome non-ATPase regulatory subunit 14 | O35593     |
| Psmc2  | -0.0005                          | 0.06            | 0.46          | -0.09           | 0.51          | -0.08           | 0.57          | -0.03           | 1             | 26S proteasome non-ATPase regulatory subunit 2  | Q8VDM4     |
| Psmc3  | -2.4447                          | 0.46            | <u>0.0190</u> | -0.88           | <u>0.0003</u> | 0.15            | 0.59          | -0.42           | 0.52          | 26S proteasome non-ATPase regulatory subunit 3  | P14685     |
| Psmc4  | -0.0267                          | -0.35           | <u>0.0280</u> | 0.15            | 0.47          | 0.05            | 0.66          | -0.20           | 0.24          | 26S proteasome non-ATPase regulatory subunit 4  | O35226     |
| Psmc5  | -0.0140                          | 0.14            | 0.68          | -0.65           | 0.12          | 0.15            | 0.78          | -0.51           | 0.19          | 26S proteasome non-ATPase regulatory subunit 5  | Q8BJY1     |
| Psmc6  | 0.5132                           | 3.84            | 0.38          | 0.97            | 0.47          | 5.31            | 0.056         | 4.81            | 0.087         | 26S proteasome non-ATPase regulatory subunit 6  | Q99JI4     |
| Psmc7  | 0.0000                           | 0.04            | 0.5           | 0.02            | 0.82          | -0.27           | 0.23          | 0.05            | 0.65          | 26S proteasome non-ATPase regulatory subunit 7  | P26516     |
| Psmc8  | -0.0652                          | -0.31           | 0.21          | 0.39            | 0.16          | 0.08            | 0.8           | 0.08            | 0.67          | 26S proteasome non-ATPase regulatory subunit 8  | Q9CX56     |

Table S2: Differentially expressed proteins in cerebral cortex (*continued*)

| gene   | $\pi_{TW/EW} \times \pi_{TF/TW}$ | log2FC<br>TW/EW | padj<br>TW/EW | log2FC<br>TF/TW | padj<br>TF/TW | log2FC<br>EF/EW | padj<br>EF/EW | log2FC<br>TF/EW | padj<br>TF/EW | description                                                       | accession  |
|--------|----------------------------------|-----------------|---------------|-----------------|---------------|-----------------|---------------|-----------------|---------------|-------------------------------------------------------------------|------------|
| Psmid9 | 0.0000                           | -0.32           | 1             | -0.28           | 0.94          | 0.02            | 0.85          | -0.61           | 0.48          | 26S proteasome non-ATPase regulatory subunit 9                    | Q9CR00     |
| Pspc1  | -0.6366                          | 0.33            | 0.058         | -0.52           | <u>0.0010</u> | -0.02           | 0.55          | -0.19           | <u>0.0410</u> | Paraspeckle component 1                                           | Q8R326     |
| Ptbp2  | -0.0975                          | 0.38            | 0.27          | -0.49           | 0.12          | -0.26           | 0.32          | -0.11           | 0.68          | Polypyrimidine tract-binding protein 2                            | Q91Z31     |
| Ptgds  | -0.1952                          | -0.79           | <u>0.0010</u> | 0.29            | 0.52          | -0.87           | <u>0.0011</u> | -0.51           | <u>0.0310</u> | Prostaglandin-H2 D-isomerase                                      | O09114     |
| Ptges3 | -0.0031                          | -0.06           | 0.65          | 0.26            | 0.088         | -0.17           | 0.88          | 0.20            | 0.059         | Prostaglandin E synthase 3                                        | D3Z7C6     |
| Ptk2   | 0.0007                           | 0.07            | 0.78          | 0.18            | 0.33          | -0.10           | 0.68          | 0.25            | 0.13          | Non-specific protein-tyrosine kinase                              | A0A5F8MPY3 |
| Ptk2b  | -0.0882                          | 1.03            | <u>0.0240</u> | -0.21           | 0.56          | 0.20            | 0.41          | 0.82            | 0.097         | Non-specific protein-tyrosine kinase                              | E9Q2A6     |
| Ptk7   | 0.0007                           | 3.79            | 0.44          | 0.06            | 0.98          | 0.43            | 0.69          | 3.85            | 0.49          | Inactive tyrosine-protein kinase 7                                | Q8BKG3     |
| Ptms   | -1.3375                          | -0.60           | <u>0.0020</u> | 0.43            | <u>0.0120</u> | -0.19           | 0.56          | -0.17           | 0.16          | Parathymosin                                                      | Q9D0J8     |
| Ptp4a2 | 0.0000                           | 0.06            | 0.9           | -0.19           | 0.93          | 0.05            | 0.9           | -0.12           | 0.62          | Protein tyrosine phosphatase type IVA 2                           | O70274     |
| Ptpa   | -1.2182                          | -0.91           | <u>0.0390</u> | 0.74            | 0.052         | -0.20           | 0.69          | -0.18           | 0.88          | Serine/threonine-protein phosphatase 2A activator                 | A2AWE9     |
| Ptpmt1 | -0.1779                          | 0.61            | <u>0.0230</u> | -0.38           | 0.34          | 0.15            | 0.51          | 0.23            | 0.65          | Phosphatidylglycerophosphatase and protein-tyrosine phosphatase 1 | A0A5F8MPX4 |
| Ptpn11 | 0.0000                           | -0.01           | 0.88          | 0.21            | 0.5           | -0.27           | 0.51          | 0.20            | 0.99          | Tyrosine-protein phosphatase non-receptor type 11                 | P35235     |
| Ptpn23 | -0.1585                          | 0.69            | 0.081         | -0.32           | 0.22          | 0.58            | 0.28          | 0.36            | 0.073         | Tyrosine-protein phosphatase non-receptor type 23                 | Q6PB44     |
| Ptptra | 0.0038                           | -0.13           | 0.73          | -3.25           | 0.86          | 0.92            | 0.45          | -3.38           | 0.8           | Receptor-type tyrosine-protein phosphatase alpha                  | Q91V35     |
| Ptprd  | -0.0243                          | 0.15            | 0.59          | -0.54           | <u>0.0490</u> | -0.03           | 0.69          | -0.40           | 0.2           | Receptor-type tyrosine-protein phosphatase delta                  | Q64487     |
| Ptprn2 | -0.1489                          | 0.42            | 0.077         | -0.40           | 0.16          | -0.10           | 0.71          | 0.03            | 0.84          | Receptor-type tyrosine-protein phosphatase N2                     | P80560     |
| Ptprs  | -0.0079                          | 0.13            | 0.42          | -0.23           | 0.2           | 0.25            | 0.7           | -0.10           | 0.61          | Receptor-type tyrosine-protein phosphatase S                      | B0V2N1     |
| Ptprz1 | 0.0159                           | 0.12            | 0.31          | 0.57            | 0.35          | -0.14           | 0.38          | 0.68            | <u>0.0420</u> | Receptor-type tyrosine-protein phosphatase zeta                   | B9EKR1     |
| Pthr2  | -0.0145                          | 1.06            | 0.67          | -0.91           | 0.82          | 0.23            | 0.68          | 0.15            | 0.62          | Peptidyl-tRNA hydrolase 2, mitochondrial                          | Q8R2Y8     |
| Pum1   | 0.0001                           | 0.13            | 0.61          | 0.06            | 0.84          | 0.26            | 0.31          | 0.19            | 0.37          | Pumilio homolog 1                                                 | Q80U78     |
| Pum2   | -0.0009                          | -0.22           | 0.4           | 0.10            | 0.79          | 0.14            | 0.74          | -0.13           | 0.48          | Pumilio homolog 2                                                 | Q3TQ29     |
| Pura   | -0.6428                          | 0.50            | <u>0.0003</u> | -0.28           | <u>0.0480</u> | -0.35           | <u>0.0260</u> | 0.23            | <u>0.0020</u> | Transcriptional activator protein Pur-alpha                       | P42669     |
| Purb   | -0.3488                          | 0.78            | 0.26          | -0.83           | 0.12          | 0.02            | 0.7           | -0.05           | 0.67          | Transcriptional activator protein Pur-beta                        | O35295     |
| Purg   | -1.5429                          | 0.79            | 0.065         | -0.84           | <u>0.0110</u> | -0.37           | 0.97          | -0.05           | 0.92          | Purine-rich element-binding protein gamma                         | Q8R4E6     |
| Pycr2  | 0.0197                           | -0.25           | 0.6           | -0.28           | 0.054         | 0.01            | 0.81          | -0.53           | 0.19          | Pyrroline-5-carboxylate reductase 2                               | Q922Q4     |
| Pycr3  | 0.1288                           | 0.14            | 0.39          | 0.75            | <u>0.0010</u> | -0.04           | 0.66          | 0.89            | <u>0.0020</u> | Pyrroline-5-carboxylate reductase 3                               | Q9DCC4     |

Table S2: Differentially expressed proteins in cerebral cortex (*continued*)

| gene      | $\pi_{TW/EW} \times \pi_{TF/TW}$ | log2FC<br>TW/EW | padj<br>TW/EW | log2FC<br>TF/TW | padj<br>TF/TW | log2FC<br>EF/EW | padj<br>EF/EW | log2FC<br>TF/EW | padj<br>TF/EW | description                                          | accession  |
|-----------|----------------------------------|-----------------|---------------|-----------------|---------------|-----------------|---------------|-----------------|---------------|------------------------------------------------------|------------|
| Pygb      | 0.0039                           | -0.25           | 0.45          | -0.09           | 0.32          | -0.12           | 0.94          | -0.35           | 0.11          | Glycogen phosphorylase, brain form                   | Q8CI94     |
| Pzp       | -0.0794                          | -0.62           | <u>0.0140</u> | 0.16            | 0.37          | -0.13           | 0.98          | -0.46           | 0.15          | Pregnancy zone protein                               | Q61838     |
| Q8K207    | -0.0001                          | -0.02           | 0.94          | 0.19            | 0.23          | -0.18           | 0.95          | 0.16            | 0.29          | Uncharacterized protein C1orf21 homolog              | Q8K207     |
| Qars1     | 0.0668                           | 0.53            | 0.27          | 0.25            | 0.13          | 0.42            | 0.5           | 0.79            | <u>0.0230</u> | Glutamine-tRNA ligase                                | Q8BML9     |
| Qdpr      | 0.0030                           | -0.35           | <u>0.0190</u> | -0.03           | 0.68          | -0.01           | 0.58          | -0.38           | <u>0.0320</u> | Dihydropteridine reductase                           | A0A0G2JGJ1 |
| Qki       | -0.2342                          | -0.58           | 0.23          | 0.53            | 0.064         | -0.31           | 0.57          | -0.05           | 0.88          | Protein quaking                                      | Q9QYS9     |
| Rab11b    | -0.0048                          | -0.36           | 0.12          | 0.18            | 0.83          | -0.09           | 0.56          | -0.18           | 0.47          | Ras-related protein Rab-11B                          | G3UY29     |
| Rab11fip2 | -0.4562                          | 1.34            | 0.3           | -1.28           | 0.31          | -1.00           | 0.23          | 0.06            | 0.79          | Rab11 family-interacting protein 2                   | G3XA57     |
| Rab11fip5 | -0.9556                          | 0.93            | 0.055         | -0.78           | 0.09          | 0.04            | 0.68          | 0.16            | 0.88          | Rab11 family-interacting protein 5                   | A0A0N4SW73 |
| Rab13     | 0.0000                           | -0.01           | 0.97          | -0.05           | 1             | 0.24            | 0.21          | -0.06           | 0.93          | Ras-related protein Rab-13                           | Q9DD03     |
| Rab18     | 0.0000                           | -0.01           | 0.72          | 0.01            | 0.75          | -0.81           | 0.12          | 0.00            | 0.96          | Ras-related protein Rab-18                           | A0A452J8C1 |
| Rab23     | 1.6828                           | -0.68           | 0.12          | -2.45           | 0.08          | 0.01            | 0.97          | -3.14           | <u>0.0280</u> | Ras-related protein Rab-23                           | P35288     |
| Rab27b    | 0.0044                           | -0.10           | 0.76          | -0.60           | 0.24          | -0.46           | 0.43          | -0.70           | 0.17          | Ras-related protein Rab-27B                          | Q99P58     |
| Rab2a     | 0.0042                           | -0.32           | 0.51          | -0.21           | 0.61          | -0.25           | 0.69          | -0.53           | 0.22          | Ras-related protein Rab-2A                           | P53994     |
| Rab33b    | 0.0001                           | 0.60            | 0.89          | 0.06            | 0.92          | 0.02            | 0.68          | 0.66            | 0.91          | Ras-related protein Rab-33B                          | O35963     |
| Rab3gap2  | 0.0006                           | -0.47           | 0.88          | -0.11           | 0.6           | -0.47           | 0.4           | -0.58           | 0.53          | Rab3 GTPase-activating protein non-catalytic subunit | E9QKE4     |
| Rab5b     | -4.3040                          | 0.69            | <u>0.0110</u> | -1.18           | <u>0.0020</u> | -0.32           | 0.71          | -0.49           | 0.37          | Ras-related protein Rab-5B                           | P61021     |
| Rab6a     | -0.0182                          | 0.35            | 0.26          | -0.23           | 0.41          | -0.32           | 0.59          | 0.13            | 0.75          | Ras-related protein Rab-6A                           | P35279     |
| Rab7a     | 0.0022                           | -0.01           | 0.55          | -1.23           | 0.21          | 0.51            | 0.27          | -1.23           | 0.31          | Ras-related protein Rab-7a                           | P51150     |
| Rab8b     | -0.0033                          | 0.05            | 0.32          | -0.18           | 0.18          | 0.11            | 0.88          | -0.13           | 0.78          | Ras-related protein Rab-8B                           | P61028     |
| Rabep1    | -0.0185                          | 0.39            | 0.22          | -0.22           | 0.47          | 0.10            | 0.89          | 0.16            | 0.61          | Rab GTPase-binding effector protein 1                | O35551     |
| Rabgap1   | -0.0005                          | -0.34           | 0.28          | 0.21            | 0.97          | 0.43            | 0.16          | -0.14           | 0.61          | Rab GTPase-activating protein 1                      | A2AWA9     |
| Rabggt    | -0.0091                          | -0.17           | 0.41          | 0.21            | 0.22          | -0.10           | 0.73          | 0.05            | 0.75          | Geranylgeranyl transferase type-2 subunit alpha      | Q9JHK4     |
| Rac1      | 0.0034                           | -0.25           | 0.36          | -0.07           | 0.36          | -0.05           | 0.61          | -0.32           | 0.068         | Ras-related C3 botulinum toxin substrate 1           | P63001     |
| Rack1     | 0.0000                           | 0.21            | 0.21          | 0.02            | 0.99          | 0.04            | 0.4           | 0.24            | 0.12          | Receptor of activated protein C kinase 1             | P68040     |
| Rala      | 0.0006                           | -0.33           | 0.47          | -0.06           | 0.81          | 0.31            | 0.28          | -0.39           | 0.48          | Ras-related protein Ral-A                            | P63321     |
| Ralb      | -0.0042                          | 0.20            | 0.57          | -0.22           | 0.41          | 0.09            | 0.72          | -0.02           | 0.89          | Ras-related protein Ral-B                            | Q9JIW9     |
| Ralgapa1  | -0.0024                          | -0.15           | 0.71          | 0.17            | 0.23          | 1.05            | <u>0.0430</u> | 0.02            | 0.25          | Ral GTPase-activating protein subunit alpha-1        | A0A2I3BRX9 |
| Ralgapb   | 0.0005                           | 0.10            | 0.82          | 0.27            | 0.62          | -0.04           | 0.94          | 0.37            | 0.62          | Ral GTPase-activating protein subunit beta           | A2ACC6     |
| Raly      | 0.0002                           | -0.04           | 0.97          | -1.17           | 0.43          | -2.41           | 0.25          | -1.21           | 0.44          | RNA-binding protein Raly (Fragment)                  | A2AU61     |
| Ran       | 0.0365                           | -0.34           | 0.15          | -0.21           | 0.24          | -0.38           | 0.078         | -0.55           | <u>0.0010</u> | GTP-binding nuclear protein Ran                      | P62827     |
| Ranbp1    | 0.0015                           | -0.28           | <u>0.0250</u> | -0.02           | 0.68          | -0.28           | 0.062         | -0.31           | <u>0.0170</u> | Ran-specific GTPase-activating protein               | H7BX22     |
| Ranbp10   | -0.3240                          | 3.59            | 0.59          | -3.65           | 0.78          | -1.21           | 0.57          | -0.06           | 0.83          | Ran-binding protein 10                               | A0A0R4J0G4 |

Table S2: Differentially expressed proteins in cerebral cortex (*continued*)

| gene     | $\pi_{TW/EW} \times \pi_{TF/TW}$ | log2FC<br>TW/EW | padj<br>TW/EW | log2FC<br>TF/TW | padj<br>TF/TW | log2FC<br>EF/EW | padj<br>EF/EW | log2FC<br>TF/EW | padj<br>TF/EW | description                                                     | accession  |
|----------|----------------------------------|-----------------|---------------|-----------------|---------------|-----------------|---------------|-----------------|---------------|-----------------------------------------------------------------|------------|
| Ranbp2   | -32.0944                         | 2.29            | <u>0.0050</u> | -2.54           | <u>0.0040</u> | 0.23            | 0.35          | -0.26           | 0.78          | E3 SUMO-protein ligase RanBP2                                   | Q9ERU9     |
| Rangap1  | 0.0000                           | 0.02            | 0.69          | 0.04            | 0.92          | -0.54           | 0.12          | 0.06            | 0.55          | Ran GTPase-activating protein 1                                 | P46061     |
| Rap1gap  | 0.0002                           | 0.34            | 0.25          | 0.06            | 0.96          | -0.14           | 0.97          | 0.40            | 0.14          | Rap1 GTPase-activating protein 1                                | A2ALS5     |
| Rapgef2  | -0.1630                          | 0.58            | 0.15          | -0.60           | 0.27          | -0.04           | 0.92          | -0.02           | 0.95          | Cyclic nucleotide ras GEF                                       | A0A0A6YWG7 |
| Rapgef4  | -7.4794                          | 1.00            | 0.066         | -2.06           | <u>0.0008</u> | -0.04           | 0.78          | -1.06           | 0.11          | Rap guanine nucleotide exchange factor 4                        | Q9EQZ6     |
| Raph1    | -0.0065                          | -0.22           | 0.78          | 0.51            | 0.29          | 0.19            | 0.54          | 0.28            | 0.48          | Ras association (RalGDS/AF-6) and pleckstrin homology domains 1 | F2Z3U3     |
| Rars2    | 0.0566                           | -0.41           | 0.54          | -1.37           | 0.42          | -0.83           | 0.49          | -1.78           | 0.25          | Probable arginine-tRNA ligase, mitochondrial                    | Q3U186     |
| Rasa3    | 0.0001                           | 0.05            | 0.34          | 0.13            | 0.94          | -0.09           | 0.8           | 0.18            | 0.67          | Ras GTPase-activating protein 3                                 | Q60790     |
| Rasal1   | 0.0002                           | 0.09            | 0.61          | 0.07            | 0.77          | -0.10           | 0.64          | 0.16            | 0.42          | RasGAP-activating-like protein 1                                | Q9Z268     |
| Rasal2   | -7.0964                          | 1.26            | 0.085         | -2.12           | <u>0.0033</u> | -0.35           | 0.6           | -0.87           | 0.35          | RAS protein activator-like 2                                    | D3YUS5     |
| Rasgef1a | -0.0197                          | 0.94            | 0.8           | -1.08           | 0.63          | 0.12            | 0.6           | -0.14           | 0.77          | RasGEF domain family, member 1A                                 | A0A0N4SVF2 |
| Rasgrf1  | -2.8265                          | 3.67            | 0.6           | -7.21           | 0.33          | -3.41           | 0.54          | -3.55           | 0.66          | Ras-specific guanine nucleotide-releasing factor 1              | P27671     |
| Rasgrf2  | -1.4244                          | 1.20            | 0.32          | -1.59           | <u>0.0310</u> | -0.47           | 0.66          | -0.39           | 0.6           | Ras-specific guanine nucleotide-releasing factor 2              | D3Z6K8     |
| Rbbp7    | -0.3898                          | 1.01            | 0.3           | -0.77           | 0.11          | 0.64            | 0.53          | 0.24            | 0.88          | Histone-binding protein RBBP7                                   | A2AFI9     |
| Rbfox3   | 0.0003                           | -0.07           | 0.85          | -0.26           | 0.59          | -0.42           | 0.58          | -0.33           | 0.37          | RNA binding protein fox-1 homolog 3                             | Q8BIF2     |
| Rbm14    | -4.3743                          | 1.53            | <u>0.0250</u> | -1.57           | 0.073         | -0.41           | 0.51          | -0.05           | 0.52          | RNA-binding protein 14                                          | Q8C2Q3     |
| Rbm26    | 0.0002                           | 1.00            | 0.091         | 0.01            | 0.95          | -0.33           | 0.8           | 1.01            | <u>0.0330</u> | RNA-binding protein 26                                          | E9PYZ7     |
| Rbsn     | 0.0208                           | 0.45            | 0.4           | 0.21            | 0.28          | -0.10           | 0.68          | 0.66            | 0.16          | Rabenosyn-5                                                     | Q80Y56     |
| Rcan1    | -1.1573                          | -1.15           | 0.085         | 0.94            | 0.1           | -0.05           | 0.92          | -0.22           | 0.47          | Calcipressin-1                                                  | Q9JHG6     |
| Rcc2     | -0.0001                          | 0.05            | 0.92          | -0.25           | 0.5           | 0.03            | 0.82          | -0.20           | 0.097         | Protein RCC2                                                    | Q8BK67     |
| Rdh14    | 0.0004                           | 0.21            | 0.47          | 0.08            | 0.86          | 0.33            | 0.14          | 0.29            | 0.3           | Retinol dehydrogenase 14                                        | Q9ERI6     |
| Rdx      | 0.0167                           | 0.38            | 0.37          | 0.38            | 0.54          | 0.94            | 0.069         | 0.76            | 0.15          | Radixin                                                         | P26043     |
| Reep1    | -0.0164                          | 0.96            | <u>0.0340</u> | -0.23           | 0.89          | 0.28            | 0.4           | 0.73            | 0.12          | Receptor expression-enhancing protein 1                         | Q8BGH4     |
| Reep2    | 0.0011                           | 0.24            | 0.063         | 0.05            | 0.84          | 0.14            | 0.66          | 0.28            | <u>0.0250</u> | Receptor expression-enhancing protein 2                         | Q8VCD6     |
| Reep5    | 0.0001                           | 0.06            | 0.88          | 0.15            | 0.65          | 0.19            | 0.68          | 0.21            | 0.51          | Receptor expression-enhancing protein 5 (Fragment)              | A0A494BBE3 |
| Relch    | -0.2118                          | 1.32            | 0.62          | -1.89           | 0.39          | -0.33           | 0.85          | -0.57           | 0.86          | RAB11-binding protein RELCH                                     | E9QM90     |
| Rem2     | -0.0021                          | 0.11            | 0.65          | -0.32           | 0.48          | 0.49            | 0.082         | -0.21           | 0.65          | GTP-binding protein REM 2                                       | E9Q4D5     |
| Reps1    | -0.0020                          | -0.03           | 0.86          | 0.57            | <u>0.0180</u> | 0.27            | 0.26          | 0.53            | <u>0.0190</u> | RalBP1-associated Eps domain-containing protein 1               | E9Q632     |
| Reps2    | -0.0493                          | 0.54            | 0.3           | -0.29           | 0.25          | 0.07            | 0.92          | 0.26            | 0.98          | RalBP1-associated Eps domain-containing protein 2               | A2AFI8     |
| Rgs14    | -0.0115                          | 0.23            | 0.35          | -0.26           | 0.38          | 0.09            | 0.84          | -0.02           | 0.94          | Regulator of G-protein signaling 14                             | P97492     |
| Rgs17    | -0.0003                          | 0.06            | 0.79          | -0.20           | 0.58          | -0.15           | 0.65          | -0.14           | 0.69          | Regulator of G-protein-signaling 17                             | G5E8E0     |

Table S2: Differentially expressed proteins in cerebral cortex (*continued*)

| gene    | $\pi_{\text{TW/EW}} \times \pi_{\text{TF/TW}}$ | log2FC<br>TW/EW | padj<br>TW/EW | log2FC<br>TF/TW | padj<br>TF/TW | log2FC<br>EF/EW | padj<br>EF/EW | log2FC<br>TF/EW | padj<br>TF/EW | description                                       | accession  |
|---------|------------------------------------------------|-----------------|---------------|-----------------|---------------|-----------------|---------------|-----------------|---------------|---------------------------------------------------|------------|
| Rgs6    | 0.0000                                         | -0.35           | 0.96          | 0.35            | 0.99          | 0.12            | 0.48          | 0.00            | 0.81          | Regulator of G-protein-signaling 6 (Fragment)     | A0A087WPC4 |
| Rgs7    | -0.0002                                        | -0.69           | 0.64          | 0.31            | 0.99          | 0.49            | 0.73          | -0.39           | 0.86          | Regulator of G-protein-signaling 7                | Q80XD3     |
| Rheb    | 0.0000                                         | -0.02           | 0.98          | -0.37           | 0.33          | 0.11            | 0.72          | -0.39           | 0.24          | GTP-binding protein Rheb                          | Q921J2     |
| Rhob    | 0.0000                                         | -0.21           | 0.23          | 0.01            | 0.92          | 0.26            | 0.19          | -0.20           | 0.15          | Rho-related GTP-binding protein RhoB              | P62746     |
| Rhog    | 0.0000                                         | 0.03            | 0.97          | 0.06            | 0.63          | 0.16            | 0.27          | 0.09            | 0.4           | Rho-related GTP-binding protein RhoG              | P84096     |
| Rhot1   | -0.0145                                        | 0.31            | 0.45          | -0.33           | 0.39          | 0.14            | 0.68          | -0.01           | 0.9           | Mitochondrial Rho GTPase 1                        | Q8BG51     |
| Ric8a   | 0.0509                                         | -0.34           | 0.24          | -0.99           | 0.57          | -0.84           | 0.81          | -1.33           | 0.34          | Synembryn-A                                       | Q3TIR3     |
| Rida    | -0.0257                                        | -0.57           | <u>0.0010</u> | 0.07            | 0.61          | -0.42           | <u>0.0270</u> | -0.50           | <u>0.0020</u> | 2-iminobutanoate/2-iminopropanoate deaminase      | P52760     |
| Rimbp2  | -0.9259                                        | 1.13            | 0.26          | -1.70           | 0.15          | -0.44           | 0.25          | -0.57           | 0.23          | RIMS-binding protein 2                            | D3YXR8     |
| Rims1   | -2.2306                                        | 1.53            | 0.53          | -3.19           | <u>0.0220</u> | -1.58           | 0.063         | -1.65           | <u>0.0350</u> | Regulating synaptic membrane exocytosis protein 1 | Q99NE5     |
| Rims2   | -0.1399                                        | 5.31            | 0.51          | -1.78           | 0.89          | 4.58            | 0.27          | 3.53            | 0.51          | Regulating synaptic membrane exocytosis 2         | D9HP81     |
| Rims3   | -0.0554                                        | 0.50            | 0.43          | -0.70           | 0.37          | -0.08           | 0.5           | -0.19           | 0.22          | Regulating synaptic membrane exocytosis protein 3 | Q80U57     |
| Rln3    | 0.0444                                         | -0.36           | 0.97          | -8.66           | 0.084         | -4.46           | 0.44          | -9.03           | <u>0.0280</u> | Relaxin-3                                         | Q8CHK2     |
| Rmc1    | -0.0436                                        | -0.39           | 0.46          | 0.60            | 0.28          | 0.04            | 0.98          | 0.21            | 0.67          | Regulator of MON1-CCZ1 complex                    | Q8VC42     |
| Rmdn3   | -0.0019                                        | -0.13           | 0.89          | 0.56            | 0.3           | 0.50            | 0.16          | 0.43            | 0.18          | Regulator of microtubule dynamics protein 3       | Q3UJU9     |
| Rnf214  | -0.0942                                        | 0.42            | <u>0.0240</u> | -0.23           | 0.25          | -0.10           | 0.79          | 0.19            | 0.2           | RING finger protein 214                           | Q8BFU3     |
| Robo2   | -1.3516                                        | 0.94            | <u>0.0010</u> | -0.50           | 0.11          | 0.01            | 0.81          | 0.45            | <u>0.0100</u> | Roundabout homolog 2                              | E9Q6A0     |
| Rogdi   | 0.0000                                         | -0.27           | 1             | 0.80            | <u>0.0001</u> | 0.09            | 0.53          | 0.54            | <u>0.0001</u> | Protein rogdi homolog                             | Q3TDK6     |
| Rph3a   | -1.1134                                        | 1.36            | <u>0.0230</u> | -0.83           | 0.25          | -0.16           | 0.61          | 0.53            | 0.2           | Rabphilin-3A                                      | P47708     |
| Rpl10a  | -0.1087                                        | 0.78            | 0.76          | -1.27           | 0.12          | -0.23           | 0.48          | -0.49           | <u>0.0380</u> | Ribosomal protein                                 | A0A3B2WDD2 |
| Rpl11   | -6.7472                                        | 0.75            | <u>0.0010</u> | -0.79           | <u>0.0002</u> | -0.06           | 0.84          | -0.03           | 0.9           | 60S ribosomal protein L11                         | Q9CXW4     |
| Rpl12   | -0.3103                                        | 0.41            | 0.2           | -0.75           | <u>0.0360</u> | 0.29            | 0.37          | -0.33           | 0.38          | 60S ribosomal protein L12                         | P35979     |
| Rpl13   | -11.6640                                       | 1.51            | 0.087         | -2.38           | <u>0.0009</u> | -0.77           | 0.13          | -0.87           | 0.05          | 60S ribosomal protein L13                         | P47963     |
| Rpl13a  | -4.5345                                        | 0.80            | 0.072         | -1.39           | <u>0.0003</u> | -0.34           | 0.57          | -0.59           | 0.053         | 60S ribosomal protein L13a (Fragment)             | A0A1B0GTA1 |
| Rpl14   | -1.6556                                        | 0.95            | 0.14          | -1.26           | <u>0.0240</u> | -0.71           | <u>0.0210</u> | -0.31           | 0.28          | 60S ribosomal protein L14                         | Q9CR57     |
| Rpl15   | -0.1493                                        | 0.52            | 0.84          | -2.56           | <u>0.0330</u> | -1.38           | 0.1           | -2.04           | <u>0.0270</u> | 60S ribosomal protein L15                         | Q9CZM2     |
| Rpl17   | -1.1568                                        | 1.38            | <u>0.0290</u> | -0.78           | 0.2           | 0.00            | 0.8           | 0.59            | <u>0.0380</u> | 60S ribosomal protein L17                         | Q9CPR4     |
| Rpl18   | -0.0752                                        | 1.08            | 0.7           | -1.37           | 0.47          | -0.51           | 0.41          | -0.29           | 0.59          | 60S ribosomal protein L18                         | P35980     |
| Rpl18a  | -4.1600                                        | 0.78            | <u>0.0330</u> | -1.20           | <u>0.0010</u> | -0.32           | 0.16          | -0.41           | <u>0.0270</u> | 60S ribosomal protein L18a                        | P62717     |
| Rpl19   | -0.0072                                        | 0.68            | 0.91          | -1.06           | 0.57          | -0.47           | <u>0.0310</u> | -0.38           | 0.14          | Ribosomal protein L19                             | A2A547     |
| Rpl21   | -3.4179                                        | 0.89            | 0.082         | -1.31           | <u>0.0020</u> | -0.37           | <u>0.0020</u> | -0.42           | <u>0.0110</u> | 60S ribosomal protein L21                         | Q9CQM8     |
| Rpl22   | -0.3138                                        | 0.79            | 0.32          | -0.94           | 0.14          | -0.49           | 0.33          | -0.16           | 0.52          | 60S ribosomal protein L22                         | P67984     |
| Rpl22l1 | -0.0117                                        | 0.55            | 0.43          | -0.27           | 0.61          | 0.00            | 0.9           | 0.28            | 0.26          | 60S ribosomal protein L22-like 1                  | Q9D7S7     |

Table S2: Differentially expressed proteins in cerebral cortex (*continued*)

| gene      | $\pi_{TW/EW} \times \pi_{TF/TW}$ | log2FC<br>TW/EW | padj<br>TW/EW | log2FC<br>TF/TW | padj<br>TF/TW | log2FC<br>EF/EW | padj<br>EF/EW | log2FC<br>TF/EW | padj<br>TF/EW | description                                                             | accession  |
|-----------|----------------------------------|-----------------|---------------|-----------------|---------------|-----------------|---------------|-----------------|---------------|-------------------------------------------------------------------------|------------|
| Rpl23     | -2.2063                          | 0.82            | <u>0.0120</u> | -0.78           | <u>0.0160</u> | -0.26           | 0.064         | 0.04            | 0.54          | 60S ribosomal protein L23                                               | P62830     |
| Rpl23a    | -14.6212                         | 1.10            | <u>0.0001</u> | -1.12           | <u>0.0009</u> | -0.52           | 0.24          | -0.02           | 0.71          | 60S ribosomal protein L23a                                              | P62751     |
| Rpl24     | -2.2905                          | 1.30            | 0.3           | -2.59           | 0.05          | -3.34           | <u>0.0220</u> | -1.30           | 0.21          | 60S ribosomal protein L24                                               | Q8BP67     |
| Rpl26     | -0.0084                          | 0.64            | 0.93          | -0.97           | 0.37          | -0.40           | 0.16          | -0.33           | 0.053         | 60S ribosomal protein L26                                               | P61255     |
| Rpl27     | -0.2490                          | 0.39            | 0.093         | -0.60           | 0.093         | -0.26           | 0.52          | -0.21           | 0.81          | 60S ribosomal protein L27                                               | P61358     |
| Rpl27a    | -1.0301                          | 0.84            | 0.38          | -1.49           | <u>0.0110</u> | -0.93           | <u>0.0350</u> | -0.65           | 0.12          | 60S ribosomal protein L27a                                              | P14115     |
| Rpl28     | -0.8368                          | 1.24            | 0.26          | -1.40           | 0.15          | -0.46           | 0.39          | -0.17           | 0.65          | 60S ribosomal protein L28                                               | P41105     |
| Rpl29     | -0.1829                          | 0.96            | 0.39          | -1.05           | 0.36          | -0.13           | 0.71          | -0.08           | 0.99          | 60S ribosomal protein L29                                               | P47915     |
| Rpl3      | -12.4391                         | 1.10            | <u>0.0150</u> | -1.55           | <u>0.0001</u> | -0.44           | 0.16          | -0.45           | 0.13          | 60S ribosomal protein L3                                                | P27659     |
| Rpl30     | -2.9101                          | 0.75            | <u>0.0250</u> | -0.96           | <u>0.0030</u> | -0.20           | 0.72          | -0.20           | 0.78          | 60S ribosomal protein L30                                               | P62889     |
| Rpl31     | -0.0032                          | 0.24            | 0.92          | -1.52           | 0.57          | -0.22           | 0.78          | -1.29           | 0.51          | 60S ribosomal protein L31                                               | P62900     |
| Rpl34     | -2.8151                          | 1.52            | 0.087         | -1.60           | 0.081         | -0.84           | 0.19          | -0.08           | 0.91          | 60S ribosomal protein L34                                               | Q9D1R9     |
| Rpl35     | -0.1086                          | 0.92            | 0.34          | -0.97           | 0.55          | -0.46           | 0.5           | -0.05           | 0.7           | 60S ribosomal protein L35                                               | Q6Z WV7    |
| Rpl35a    | -0.4748                          | 0.70            | 0.072         | -0.67           | 0.13          | 0.19            | 0.26          | 0.03            | 0.56          | 60S ribosomal protein L35a                                              | O55142     |
| Rpl37     | -0.0004                          | 0.80            | 0.98          | -1.48           | 0.91          | -0.55           | <u>0.0100</u> | -0.68           | <u>0.0160</u> | 60S ribosomal protein L37                                               | Q9D823     |
| Rpl37a    | -0.7867                          | 0.66            | 0.12          | -0.85           | <u>0.0300</u> | -0.27           | 0.39          | -0.19           | 0.37          | 60S ribosomal protein L37a                                              | P61514     |
| Rpl4      | -0.5741                          | 0.83            | 0.39          | -1.30           | 0.05          | -0.46           | <u>0.0440</u> | -0.47           | 0.069         | 60S ribosomal protein L4                                                | Q9D8E6     |
| Rpl5      | 0.0219                           | 0.48            | <u>0.0020</u> | 0.28            | 0.87          | 0.33            | <u>0.0020</u> | 0.76            | <u>0.0001</u> | 60S ribosomal protein L5                                                | P47962     |
| Rpl6      | -7.7386                          | 1.17            | <u>0.0040</u> | -1.28           | <u>0.0070</u> | -0.19           | 0.89          | -0.10           | 0.89          | 60S ribosomal protein L6                                                | P47911     |
| Rpl7      | -3.7294                          | 1.20            | 0.23          | -1.93           | <u>0.0030</u> | -0.59           | <u>0.0270</u> | -0.73           | <u>0.0040</u> | 60S ribosomal protein L7                                                | P14148     |
| Rpl7a     | -3.1340                          | 1.06            | 0.12          | -1.49           | <u>0.0070</u> | -0.36           | 0.56          | -0.43           | 0.17          | 60S ribosomal protein L7a                                               | P12970     |
| Rpl8      | -0.1484                          | 1.01            | 0.58          | -1.29           | 0.33          | -0.52           | 0.19          | -0.29           | 0.072         | 60S ribosomal protein L8                                                | P62918     |
| Rplp0     | 0.0029                           | 0.10            | 0.052         | 0.11            | 0.62          | 0.33            | 0.61          | 0.21            | 0.83          | 60S acidic ribosomal protein P0                                         | P14869     |
| Rplp2     | -0.0016                          | -0.07           | 0.86          | 0.67            | 0.3           | 0.21            | 0.98          | 0.60            | 0.19          | 60S acidic ribosomal protein P2                                         | P99027     |
| Rpn1      | 0.2745                           | 0.48            | <u>0.0010</u> | 0.52            | 0.43          | 0.25            | 0.54          | 0.99            | <u>0.0001</u> | Dolichyl-diphosphooligosaccharide-protein glycosyltransferase subunit 1 | Q91YQ5     |
| Rps11     | -1.9346                          | 0.89            | <u>0.0450</u> | -0.95           | <u>0.0200</u> | -0.40           | 0.56          | -0.07           | 0.87          | 40S ribosomal protein S11                                               | P62281     |
| Rps13     | -0.0556                          | 1.55            | 0.33          | -0.92           | 0.83          | -0.71           | 0.7           | 0.63            | 0.38          | 40S ribosomal protein S13                                               | P62301     |
| Rps14     | -0.2303                          | 0.63            | 0.32          | -0.96           | 0.17          | -1.03           | <u>0.0430</u> | -0.33           | 0.64          | 40S ribosomal protein S14                                               | P62264     |
| Rps15a    | -0.4876                          | 0.76            | <u>0.0310</u> | -0.48           | 0.13          | -0.34           | 0.21          | 0.29            | 0.14          | 40S ribosomal protein S15a (Fragment)                                   | F8WJ41     |
| Rps16     | -0.5313                          | 0.81            | <u>0.0400</u> | -0.63           | 0.18          | -0.21           | 0.22          | 0.18            | 0.51          | 40S ribosomal protein S16                                               | P14131     |
| Rps17     | 0.0000                           | -0.03           | 0.94          | 0.07            | 0.7           | 0.10            | 0.65          | 0.03            | 0.65          | 40S ribosomal protein S17                                               | P63276     |
| Rps18-ps5 | -5.8191                          | 0.72            | <u>0.0019</u> | -0.99           | <u>0.0010</u> | -0.33           | 0.29          | -0.27           | 0.47          | 40S ribosomal protein S18                                               | A0A1Y7VKY1 |
| Rps19     | -2.6054                          | 1.27            | <u>0.0010</u> | -0.83           | 0.15          | -0.04           | 0.96          | 0.44            | 0.056         | 40S ribosomal protein S19                                               | Q9CZX8     |
| Rps2      | -0.0038                          | 0.79            | 0.61          | -0.62           | 0.92          | -0.36           | 0.23          | 0.17            | 0.28          | 40S ribosomal protein S2                                                | P25444     |
| Rps21     | -5.6964                          | -0.47           | <u>0.0010</u> | 1.01            | <u>0.0001</u> | -0.05           | 0.63          | 0.54            | <u>0.0001</u> | 40S ribosomal protein S21                                               | Q9CQR2     |
| Rps23     | -0.5604                          | 0.45            | 0.067         | -0.64           | <u>0.0220</u> | -0.01           | 0.97          | -0.19           | 0.23          | 40S ribosomal protein S23                                               | P62267     |
| Rps25     | -6.0143                          | 1.53            | <u>0.0010</u> | -1.11           | 0.066         | -0.18           | 0.74          | 0.42            | 0.2           | 40S ribosomal protein S25                                               | P62852     |



Table S2: Differentially expressed proteins in cerebral cortex (*continued*)

| gene    | $\pi_{\text{TF}/\text{EW}} \times \pi_{\text{TF}/\text{TW}}$ | log2FC<br>TW/EW | padj<br>TW/EW | log2FC<br>TF/TW | padj<br>TF/TW | log2FC<br>EF/EW | padj<br>EF/EW | log2FC<br>TF/EW | padj<br>TF/EW | description                                                 | accession  |
|---------|--------------------------------------------------------------|-----------------|---------------|-----------------|---------------|-----------------|---------------|-----------------|---------------|-------------------------------------------------------------|------------|
| Rps27a  | -0.0557                                                      | 0.75            | 0.17          | -0.35           | 0.53          | 0.44            | 0.27          | 0.41            | 0.16          | Ubiquitin-40S ribosomal protein S27a                        | P62983     |
| Rps28   | -2.0419                                                      | -0.73           | <u>0.0280</u> | 1.16            | <u>0.0280</u> | -0.41           | 0.3           | 0.42            | 0.17          | 40S ribosomal protein S28                                   | P62858     |
| Rps3    | -0.6713                                                      | 0.50            | <u>0.0010</u> | -0.27           | <u>0.0220</u> | -0.02           | 0.79          | 0.23            | 0.39          | 40S ribosomal protein S3                                    | P62908     |
| Rps3a   | -0.7542                                                      | 2.00            | <u>0.0170</u> | -0.93           | 0.59          | -0.83           | 0.45          | 1.07            | 0.051         | 40S ribosomal protein S3a                                   | P97351     |
| Rps4x   | -0.3833                                                      | 0.76            | 0.17          | -0.88           | 0.18          | -0.22           | 0.92          | -0.12           | 1             | 40S ribosomal protein S4, X isoform                         | P62702     |
| Rps5    | 0.0000                                                       | 0.01            | 0.68          | -0.03           | 0.68          | 0.13            | 0.51          | -0.03           | 0.96          | 40S ribosomal protein S5                                    | P97461     |
| Rps6    | -1.1092                                                      | 0.86            | 0.21          | -1.12           | <u>0.0200</u> | -0.52           | <u>0.0450</u> | -0.25           | 0.19          | 40S ribosomal protein S6                                    | P62754     |
| Rps7    | -0.0065                                                      | 0.62            | 0.52          | -0.49           | 0.84          | -0.11           | 0.78          | 0.13            | 0.15          | 40S ribosomal protein S7                                    | P62082     |
| Rps8    | -1.2713                                                      | 1.48            | <u>0.0010</u> | -0.76           | 0.42          | 0.00            | 0.46          | 0.73            | <u>0.0440</u> | 40S ribosomal protein S8                                    | P62242     |
| Rps9    | -0.1315                                                      | 0.70            | 0.59          | -0.96           | 0.14          | -0.55           | 0.076         | -0.26           | 0.23          | 40S ribosomal protein S9                                    | Q6ZWN5     |
| Rpsa    | -3.0511                                                      | -0.33           | <u>0.0057</u> | 1.03            | <u>0.0001</u> | -0.12           | 0.38          | 0.69            | <u>0.0001</u> | 40S ribosomal protein SA                                    | P14206     |
| Rptor   | -0.0077                                                      | 0.22            | 0.85          | -0.85           | 0.26          | -0.43           | 0.54          | -0.63           | 0.28          | Regulatory-associated protein of mTOR                       | A2ACM0     |
| Rrbp1   | 0.0099                                                       | 0.36            | <u>0.0049</u> | 0.26            | 0.9           | 0.03            | 0.98          | 0.62            | <u>0.0020</u> | Ribosome-binding protein 1                                  | A2AVJ7     |
| Rtcb    | -0.0565                                                      | 0.67            | 0.41          | -0.44           | 0.32          | -0.33           | 0.64          | 0.23            | 0.91          | RNA-splicing ligase RtcB homolog                            | Q99LF4     |
| Rtn1    | 0.0000                                                       | 0.02            | 0.89          | -0.05           | 0.87          | 0.09            | 0.66          | -0.03           | 0.87          | Reticulon-1                                                 | Q8K0T0     |
| Rtn3    | -0.0421                                                      | 0.09            | 0.21          | -0.32           | <u>0.0070</u> | 0.07            | 0.5           | -0.23           | 0.36          | Reticulon-3                                                 | Q9ES97     |
| Rtn4    | 0.0008                                                       | -0.15           | 0.16          | -0.04           | 0.69          | 0.24            | <u>0.0410</u> | -0.19           | 0.06          | Reticulon-4                                                 | Q99P72     |
| RTRAF   | -0.1679                                                      | 0.87            | <u>0.0330</u> | -0.31           | 0.38          | -0.48           | 0.63          | 0.55            | 0.53          | RNA transcription, translation and transport factor protein | Q9CQE8     |
| Rufy3   | -0.0040                                                      | -0.29           | 0.25          | 0.11            | 0.62          | -0.21           | 0.4           | -0.18           | 0.44          | Protein RUFY3                                               | Q9D394     |
| Rundc3a | 0.0463                                                       | 0.47            | 0.12          | 0.30            | 0.44          | -0.10           | 0.85          | 0.78            | <u>0.0160</u> | RUN domain-containing protein 3A                            | O08576     |
| Ruvbl1  | 0.0145                                                       | 0.41            | 0.073         | 0.41            | 0.84          | 0.17            | 0.55          | 0.81            | <u>0.0020</u> | RuvB-like 1                                                 | P60122     |
| Ruvbl2  | -0.0739                                                      | -0.28           | 0.34          | 0.48            | 0.067         | -0.02           | 0.61          | 0.20            | 0.85          | RuvB-like 2                                                 | Q9WTM5     |
| Ryr2    | 0.0003                                                       | 0.04            | 0.6           | 0.22            | 0.67          | -0.02           | 0.81          | 0.25            | 0.26          | Ryanodine receptor 2                                        | E9Q401     |
| Ryr3    | -0.0648                                                      | -0.54           | 0.062         | 0.23            | 0.37          | -0.13           | 0.63          | -0.31           | 0.18          | Ryanodine receptor 3                                        | A0A140LJK7 |
| S100a13 | -0.2999                                                      | -0.48           | <u>0.0280</u> | 0.39            | 0.093         | 0.05            | 0.86          | -0.09           | 0.75          | Protein S100-A13                                            | A0A0A0MQ90 |
| Sacm1l  | 0.0044                                                       | 0.10            | 0.75          | 0.27            | <u>0.0480</u> | -0.37           | <u>0.0180</u> | 0.37            | <u>0.0140</u> | Phosphatidylinositol-3-phosphatase SAC1                     | A0A5F8MPK9 |
| Sacs    | -19.4157                                                     | 1.41            | <u>0.0010</u> | -1.53           | <u>0.0010</u> | -0.04           | 0.81          | -0.12           | 0.87          | Sacsin                                                      | Q9JLC8     |
| Safb    | -0.1657                                                      | 0.55            | 0.38          | -0.87           | 0.15          | -1.26           | <u>0.0290</u> | -0.32           | 0.47          | Scaffold attachment factor B1                               | D3YXK2     |
| Samm50  | -0.0025                                                      | 0.36            | <u>0.0280</u> | -0.01           | 0.35          | 0.29            | 0.4           | 0.35            | <u>0.0450</u> | Sorting and assembly machinery component 50 homolog         | Q8BGH2     |
| Sar1a   | -0.0010                                                      | 0.13            | 0.77          | -0.24           | 0.53          | -0.41           | 0.34          | -0.10           | 0.65          | GTP-binding protein SAR1a                                   | P36536     |
| Sarm1   | -2.5541                                                      | 0.85            | <u>0.0380</u> | -1.16           | <u>0.0150</u> | 0.68            | 0.25          | -0.31           | 0.37          | NAD(+) hydrolase SARM1                                      | Q6PDS3     |
| Sarnp   | 0.0000                                                       | -0.20           | 0.54          | 0.00            | 0.99          | -0.50           | <u>0.0100</u> | -0.19           | 0.37          | SAP domain-containing ribonucleoprotein                     | Q9D1J3     |
| Sars    | 0.0005                                                       | -0.04           | 0.77          | -0.15           | 0.17          | 0.00            | 0.96          | -0.19           | 0.99          | Seryl-tRNA synthetase                                       | Q8C483     |
| Sbds    | -16.1666                                                     | 1.81            | <u>0.0060</u> | -2.01           | <u>0.0100</u> | -0.41           | 0.64          | -0.20           | 0.58          | Ribosome maturation protein SBDS                            | P70122     |
| Sbf1    | -0.0428                                                      | 0.53            | 0.18          | -0.18           | 0.25          | 0.13            | 0.51          | 0.36            | 0.62          | Myotubularin-related protein 5                              | Q6ZPE2     |
| Sbf2    | -78.9369                                                     | 5.28            | <u>0.0280</u> | -6.20           | <u>0.0280</u> | -0.76           | 0.22          | -0.92           | 0.094         | Myotubularin-related protein 13                             | E9PXF8     |

Table S2: Differentially expressed proteins in cerebral cortex (*continued*)

| gene     | $\pi_{TW/EW} \times \pi_{TF/TW}$ | log2FC<br>TW/EW | padj<br>TW/EW | log2FC<br>TF/TW | padj<br>TF/TW | log2FC<br>EF/EW | padj<br>EF/EW | log2FC<br>TF/EW | padj<br>TF/EW | description                                                              | accession  |
|----------|----------------------------------|-----------------|---------------|-----------------|---------------|-----------------|---------------|-----------------|---------------|--------------------------------------------------------------------------|------------|
| Scai     | -1.1492                          | -0.49           | <u>0.0006</u> | 0.40            | <u>0.0150</u> | 0.35            | 0.25          | -0.09           | 0.24          | Protein SCAI                                                             | Q8C8N2     |
| Scamp5   | 0.0000                           | -0.02           | 0.9           | 0.05            | 0.92          | -0.08           | 0.78          | 0.02            | 0.91          | Secretory carrier-associated membrane protein 5                          | Q9JKD3     |
| Sccpdh   | 0.0021                           | 0.32            | <u>0.0130</u> | 0.03            | 0.77          | 0.20            | 0.69          | 0.35            | <u>0.0001</u> | Saccharopine dehydrogenase-like oxidoreductase                           | Q8R127     |
| Scfd1    | 0.0500                           | 1.12            | 0.35          | 0.26            | 0.42          | -0.64           | 0.77          | 1.38            | 0.14          | Sec1 family domain-containing protein 1                                  | Q8BRF7     |
| Scg2     | -0.0628                          | -0.21           | 0.11          | 0.23            | <u>0.0440</u> | 0.02            | 0.79          | 0.02            | 0.9           | Secretogranin-2                                                          | Q03517     |
| Scn2a    | -0.0137                          | -0.37           | <u>0.0040</u> | 0.05            | 0.49          | 0.12            | 0.24          | -0.32           | <u>0.0220</u> | Sodium channel protein                                                   | A0A5H1ZRM8 |
| Scn2b    | -0.0003                          | -0.19           | 0.41          | 0.06            | 0.85          | 0.23            | 0.2           | -0.14           | 0.41          | Sodium channel subunit beta-2                                            | Q56A07     |
| Sco2     | 0.0261                           | 0.52            | 0.091         | 0.17            | 0.52          | 0.51            | <u>0.0017</u> | 0.69            | <u>0.0030</u> | Protein SCO2 homolog, mitochondrial                                      | Q8VCL2     |
| Scp2     | -0.0209                          | 0.15            | 0.92          | -1.67           | <u>0.0050</u> | -0.74           | 0.27          | -1.52           | <u>0.0100</u> | Sterol carrier protein 2                                                 | P32020     |
| Scrn1    | 0.0000                           | -0.21           | 0.062         | -0.01           | 0.98          | -0.02           | 0.68          | -0.22           | <u>0.0490</u> | Secernin-1                                                               | Q9CZC8     |
| Scyl2    | -0.3427                          | -0.26           | 0.15          | 0.40            | <u>0.0001</u> | -0.27           | 0.12          | 0.13            | <u>0.0420</u> | SCY1-like protein 2                                                      | G5E8J9     |
| Sdcbp    | -0.0471                          | 0.53            | 0.053         | -0.19           | 0.43          | 0.25            | 0.45          | 0.34            | <u>0.0400</u> | Syntenin-1                                                               | O08992     |
| Sdha     | -0.6282                          | 0.25            | <u>0.0300</u> | -0.55           | <u>0.0010</u> | 0.09            | 1             | -0.30           | 0.36          | Succinate dehydrogenase [ubiquinone] flavoprotein subunit, mitochondrial | Q8K2B3     |
| Sdhb     | -0.0705                          | 0.13            | 0.42          | -0.48           | <u>0.0010</u> | 0.05            | 0.87          | -0.35           | <u>0.0010</u> | Succinate dehydrogenase [ubiquinone] iron-sulfur subunit, mitochondrial  | Q9CQA3     |
| Sdk2     | 0.0000                           | -0.04           | 0.98          | 0.12            | 0.99          | 0.26            | 0.59          | 0.08            | 0.83          | Protein sidekick-2                                                       | Q6V4S5     |
| Sec16a   | -0.0005                          | 0.22            | 0.95          | -0.59           | 0.67          | -0.54           | 0.66          | -0.37           | 0.68          | Protein transport protein Sec16A                                         | E9QAT4     |
| Sec22b   | 0.0085                           | 0.31            | 0.14          | 0.12            | 0.54          | 0.38            | 0.11          | 0.43            | 0.054         | Vesicle-trafficking protein SEC22b                                       | O08547     |
| Sec23a   | 0.0009                           | 0.07            | 0.6           | 0.26            | 0.61          | 0.12            | 0.78          | 0.33            | 0.67          | Protein transport protein SEC23                                          | E9Q1S3     |
| Sec24b   | 0.0074                           | 0.04            | 0.68          | 0.46            | <u>0.0040</u> | -0.01           | 0.99          | 0.50            | <u>0.0060</u> | Sec24-related gene family, member B (S. cerevisiae)                      | Q80ZX0     |
| Sec24c   | 0.0064                           | 0.43            | 0.22          | 0.20            | 0.77          | -0.09           | 0.68          | 0.62            | 0.46          | Sec24-related gene family, member C (S. cerevisiae)                      | A0A286YDI8 |
| Sec31a   | 0.0000                           | -0.04           | 0.96          | 0.16            | 0.5           | -0.26           | 0.068         | 0.12            | 0.31          | Protein transport protein Sec31A                                         | Q3UPL0     |
| Sec62    | 0.0243                           | 1.57            | 0.14          | 0.16            | 0.77          | 0.05            | 0.86          | 1.74            | 0.14          | Translocation protein SEC62                                              | Q8BU14     |
| Sel1l    | 0.0015                           | 0.15            | 0.76          | 0.27            | 0.48          | 0.12            | 0.45          | 0.42            | 0.22          | Protein sel-1 homolog 1                                                  | J3QJX3     |
| Selenbp2 | 0.0166                           | -0.64           | <u>0.0090</u> | -0.18           | 0.85          | -0.40           | 0.44          | -0.82           | <u>0.0450</u> | Selenium-binding protein 2 (Fragment)                                    | G3UWK0     |
| Sema4a   | 0.0001                           | 0.03            | 0.97          | 0.54            | 0.23          | -0.51           | 0.34          | 0.57            | <u>0.0280</u> | Semaphorin-4A                                                            | Q62178     |
| Sema7a   | 0.0000                           | 0.05            | 0.96          | -0.48           | 0.78          | -1.09           | 0.56          | -0.43           | 0.87          | Semaphorin-7A                                                            | Q9QUR8     |
| Septin11 | -0.0063                          | 0.03            | 0.13          | -0.17           | <u>0.0410</u> | 0.04            | 0.71          | -0.14           | 0.48          | Septin                                                                   | A0A0J9YTY0 |
| Septin2  | 0.0035                           | -0.11           | 0.83          | -0.30           | <u>0.0480</u> | -0.27           | 0.26          | -0.41           | <u>0.0260</u> | Septin-2                                                                 | E9Q3V6     |
| Septin3  | 0.0009                           | 0.10            | 0.49          | 0.22            | 0.74          | 0.06            | 0.88          | 0.31            | 0.32          | Neuronal-specific septin-3                                               | A0A5F8MPL6 |
| Septin4  | 0.0003                           | -0.02           | 0.83          | -0.13           | <u>0.0370</u> | -0.11           | 0.19          | -0.16           | 0.11          | Septin-4                                                                 | A0A5F8MP96 |
| Septin5  | 0.0046                           | 0.17            | <u>0.0190</u> | 0.03            | 0.3           | -0.03           | 0.69          | 0.20            | 0.16          | Septin                                                                   | A0A338P769 |
| Septin6  | -0.0103                          | -0.15           | 0.65          | 0.21            | <u>0.0180</u> | 0.08            | 0.76          | 0.06            | 0.32          | Septin-6                                                                 | Q9R1T4     |

Table S2: Differentially expressed proteins in cerebral cortex (*continued*)

| gene      | $\pi_{TW/EW} \times \pi_{TF/TW}$ | log2FC<br>TW/EW | padj<br>TW/EW | log2FC<br>TF/TW | padj<br>TF/TW | log2FC<br>EF/EW | padj<br>EF/EW | log2FC<br>TF/EW | padj<br>TF/EW | description                                                 | accession  |
|-----------|----------------------------------|-----------------|---------------|-----------------|---------------|-----------------|---------------|-----------------|---------------|-------------------------------------------------------------|------------|
| Septin8   | -0.0005                          | -0.06           | 0.88          | 0.23            | 0.24          | 0.10            | 0.74          | 0.17            | 0.52          | Septin-8                                                    | B1AQZ0     |
| Septin9   | 0.0003                           | 0.08            | 0.16          | 0.14            | 0.93          | 0.09            | 0.78          | 0.22            | 0.23          | Septin-9                                                    | A2A6U3     |
| Serbp1    | 0.0074                           | 1.76            | <u>0.0170</u> | 0.18            | 0.97          | -0.49           | 0.71          | 1.94            | <u>0.0130</u> | Plasminogen activator inhibitor 1<br>RNA-binding protein    | A0A0N4SV32 |
| Serpina1c | -0.0079                          | -0.50           | <u>0.0180</u> | 0.08            | 0.77          | -0.99           | <u>0.0330</u> | -0.42           | 0.095         | Alpha-1-antitrypsin 1-3                                     | A0A0R4J0X5 |
| Serpinb1a | -0.0194                          | 0.41            | 0.9           | -2.33           | 0.36          | -1.01           | 0.32          | -1.93           | 0.25          | Leukocyte elastase inhibitor A                              | Q9D154     |
| Serpine1  | -0.7973                          | 0.85            | 0.2           | -1.40           | 0.11          | 0.21            | 0.54          | -0.54           | 0.51          | Plasminogen activator inhibitor 1                           | G5E899     |
| Serpine2  | 0.0048                           | 0.55            | 0.21          | 0.08            | 0.69          | 0.61            | 0.41          | 0.63            | 0.25          | Glia-derived nexin                                          | Q07235     |
| Serpinh1  | 0.0000                           | -0.02           | 0.96          | -0.10           | 0.59          | 0.05            | 0.58          | -0.12           | 0.45          | Serpin H1                                                   | P19324     |
| Sestd1    | -0.1813                          | 0.23            | 0.58          | -1.50           | <u>0.0060</u> | -0.54           | 0.3           | -1.27           | 0.07          | SEC14 domain and spectrin<br>repeat-containing protein 1    | Q80UK0     |
| Set       | 0.0052                           | 0.05            | 0.82          | 0.58            | <u>0.0080</u> | 0.30            | 0.17          | 0.63            | <u>0.0180</u> | Protein SET (Fragment)                                      | A2BE93     |
| Sez6l     | 0.0000                           | -0.29           | 0.98          | -0.22           | 0.83          | 1.18            | <u>0.0460</u> | -0.51           | 0.68          | Seizure 6-like protein                                      | A0A0G2JG23 |
| Sez6l2    | 0.0002                           | -0.24           | 0.48          | -0.08           | 0.94          | 0.24            | 0.39          | -0.32           | 0.69          | Seizure 6-like protein 2                                    | Q4V9Z5     |
| Sf1       | 0.0082                           | 0.32            | 0.58          | 0.35            | 0.49          | -0.16           | 0.72          | 0.67            | 0.052         | Splicing factor 1 (Fragment)                                | D3YVH4     |
| Sf3a1     | -1.1800                          | -0.67           | 0.081         | 0.84            | <u>0.0120</u> | -0.12           | 0.83          | 0.17            | 0.52          | Splicing factor 3A subunit 1                                | Q8K4Z5     |
| Sf3a3     | -0.2599                          | -0.73           | 0.38          | 0.92            | 0.12          | -0.50           | 0.56          | 0.19            | 0.55          | Splicing factor 3A subunit 3                                | Q9D554     |
| Sf3b1     | 0.0002                           | 0.04            | 0.88          | 0.26            | 0.49          | -0.17           | 0.34          | 0.31            | 0.14          | Splicing factor 3B subunit 1                                | Q99NB9     |
| Sf3b2     | -0.0026                          | 0.53            | 0.54          | -0.17           | 0.78          | 0.18            | 0.88          | 0.36            | 0.74          | Splicing factor 3b, subunit 2                               | Q3UJB0     |
| Sf3b3     | -0.2642                          | -0.49           | 0.22          | 0.71            | 0.07          | -0.10           | 0.64          | 0.21            | 0.48          | Splicing factor 3B subunit 3                                | Q921M3     |
| Sfpq      | -0.3985                          | 0.81            | 0.096         | -0.78           | 0.24          | 0.02            | 0.31          | 0.03            | 0.35          | Splicing factor, proline- and glutamine-rich                | Q8VIJ6     |
| Sfxn1     | 0.1251                           | -0.41           | 0.67          | -1.98           | 0.13          | 0.30            | 0.81          | -2.39           | 0.068         | Sideroflexin-1                                              | Q99JR1     |
| Sfxn3     | -10.2316                         | 0.80            | <u>0.0029</u> | -1.26           | <u>0.0001</u> | 0.17            | 0.56          | -0.46           | 0.087         | Sideroflexin-3                                              | Q91V61     |
| Sfxn5     | -0.8769                          | 0.31            | 0.071         | -0.69           | <u>0.0003</u> | 0.07            | 0.28          | -0.38           | <u>0.0010</u> | Sideroflexin-5                                              | Q925N0     |
| Sgip1     | -0.0393                          | 0.50            | 0.3           | -0.33           | 0.35          | 0.36            | 0.61          | 0.18            | 0.74          | SH3-containing GRB2-like protein<br>3-interacting protein 1 | Q8VD37     |
| Sh3bgrl3  | 0.0002                           | -0.47           | 0.99          | -0.28           | 0.47          | 0.21            | 0.56          | -0.75           | 0.6           | SH3 domain-binding glutamic<br>acid-rich-like protein 3     | Q91VW3     |
| Sh3bp1    | -0.2724                          | -0.59           | 0.054         | 0.38            | 0.11          | -0.14           | 0.56          | -0.21           | 0.4           | SH3 domain-binding protein 1                                | P55194     |
| Sh3d19    | -0.5646                          | 0.72            | <u>0.0490</u> | -0.49           | 0.06          | 0.52            | 0.58          | 0.23            | 0.71          | SH3 domain-containing protein 19                            | A0A571BEF4 |
| Sh3gl2    | -0.3482                          | -0.10           | 0.092         | 0.84            | <u>0.0001</u> | 0.13            | 0.37          | 0.75            | <u>0.0001</u> | Endophilin-A1                                               | A2ALV3     |
| Sh3gl3    | 0.0380                           | 0.13            | 0.35          | 0.40            | <u>0.0250</u> | 0.05            | 0.79          | 0.53            | <u>0.0001</u> | Endophilin-A3                                               | A0A0R4J0B8 |
| Sh3glb1   | 0.0000                           | -0.09           | 0.8           | -0.10           | 0.89          | 0.49            | 0.47          | -0.20           | 0.77          | Endophilin-B1                                               | A0A0G2JEC4 |
| Sh3glb2   | -0.0060                          | 0.20            | 0.54          | -0.26           | 0.37          | -0.17           | 0.31          | -0.06           | 0.75          | Endophilin-B2                                               | A2AWI7     |
| Sh3kbp1   | -0.2605                          | 0.70            | 0.22          | -0.76           | 0.18          | -0.01           | 0.85          | -0.07           | 0.9           | SH3 domain-containing kinase-binding<br>protein 1           | Q8R550     |
| Shank1    | -28.4520                         | 1.44            | <u>0.0220</u> | -2.98           | <u>0.0001</u> | -0.86           | <u>0.0070</u> | -1.54           | <u>0.0001</u> | SH3 and multiple ankyrin repeat domains<br>protein 1        | D3YZU1     |

Table S2: Differentially expressed proteins in cerebral cortex (*continued*)

| gene     | $\pi_{TW/EW} \times \pi_{TF/TW}$ | log2FC<br>TW/EW | padj<br>TW/EW | log2FC<br>TF/TW | padj<br>TF/TW | log2FC<br>EF/EW | padj<br>EF/EW | log2FC<br>TF/EW | padj<br>TF/EW | description                                                              | accession  |
|----------|----------------------------------|-----------------|---------------|-----------------|---------------|-----------------|---------------|-----------------|---------------|--------------------------------------------------------------------------|------------|
| Shank2   | -1.1629                          | 0.90            | 0.56          | -2.23           | <u>0.0050</u> | -0.67           | 0.54          | -1.33           | <u>0.0050</u> | SH3 and multiple ankyrin repeat domains protein 2                        | D3Z5K8     |
| Shank3   | -6.0793                          | 1.10            | 0.23          | -2.54           | <u>0.0004</u> | -0.70           | 0.11          | -1.44           | <u>0.0010</u> | SH3 and multiple ankyrin repeat domains protein 3                        | Q4ACU6     |
| Shf      | -0.0130                          | 0.25            | 0.29          | -0.19           | 0.31          | -0.08           | 0.82          | 0.06            | 0.75          | SH2 domain-containing adapter protein F (Fragment)                       | A2AQ89     |
| Shfl     | -0.0077                          | 0.35            | 0.43          | -0.39           | 0.7           | -0.17           | 0.77          | -0.05           | 0.64          | Shiftless antiviral inhibitor of ribosomal frameshifting protein homolog | Q8CAK3     |
| Shisa7   | -2.3003                          | 0.91            | 0.34          | -2.25           | <u>0.0040</u> | -0.09           | 0.84          | -1.34           | <u>0.0050</u> | Protein shisa-7 (Fragment)                                               | F6T9T6     |
| Shisa9   | -0.3895                          | 0.60            | 0.17          | -0.88           | 0.11          | 0.63            | 0.41          | -0.29           | 0.85          | Protein shisa-9                                                          | Q9CZN4     |
| Shmt2    | -0.0125                          | -0.20           | 0.44          | 0.25            | 0.2           | 0.06            | 0.96          | 0.06            | 0.67          | Serine hydroxymethyltransferase, mitochondrial                           | Q9CZN7     |
| Shoc2    | -0.2992                          | 1.28            | 0.37          | -1.22           | 0.36          | -3.67           | 0.47          | 0.06            | 0.75          | Leucine-rich repeat protein SHOC-2                                       | O88520     |
| Sik3     | -0.1544                          | 0.34            | 0.44          | -0.82           | <u>0.0280</u> | 0.33            | <u>0.0280</u> | -0.48           | <u>0.0280</u> | Non-specific serine/threonine protein kinase                             | E9PU87     |
| Sipa1l1  | -12.7888                         | 2.18            | 0.068         | -2.88           | <u>0.0180</u> | 1.28            | <u>0.0260</u> | -0.70           | 0.48          | Signal-induced proliferation-associated 1-like protein 1                 | Q4VBF8     |
| Sipa1l2  | -13.7901                         | 5.61            | 0.17          | -5.46           | 0.26          | 0.27            | 0.68          | 0.15            | 0.62          | Signal-induced proliferation-associated 1-like protein 2                 | A0A1D5RLY9 |
| Sipa1l3  | -0.0438                          | 0.36            | 0.7           | -1.09           | 0.19          | 0.37            | 0.28          | -0.73           | 0.093         | Signal-induced proliferation-associated 1-like protein 3                 | G3X9J0     |
| Sirpa    | 0.0000                           | 0.06            | 0.54          | -0.06           | 0.89          | 0.60            | <u>0.0400</u> | 0.00            | 0.57          | Tyrosine-protein phosphatase non-receptor type substrate 1               | P97797     |
| Sirt2    | 0.5782                           | -0.67           | <u>0.0006</u> | -0.47           | 0.27          | -0.42           | <u>0.0009</u> | -1.14           | <u>0.0001</u> | NAD-dependent protein deacetylase                                        | A0A140LHL5 |
| Slc12a2  | -0.0032                          | -0.30           | 0.33          | 0.12            | 0.65          | -0.04           | 0.74          | -0.18           | 0.74          | Solute carrier family 12 member 2                                        | E9QM38     |
| Slc12a5  | 0.0007                           | -0.14           | 0.49          | -0.04           | 0.41          | -0.17           | 0.96          | -0.18           | 0.91          | KCC2a-S25 variant 1                                                      | A0A076FR46 |
| Slc17a7  | 0.0020                           | -0.18           | 0.79          | -0.19           | 0.26          | -0.22           | 0.3           | -0.37           | 0.24          | Vesicular glutamate transporter 1                                        | Q3TXX4     |
| Slc1a2   | 0.0000                           | -0.05           | 0.74          | 0.03            | 0.87          | -0.11           | 0.46          | -0.01           | 0.68          | Excitatory amino acid transporter 2                                      | P43006     |
| Slc1a3   | -0.0002                          | -0.06           | 0.69          | 0.07            | 0.55          | -0.58           | 0.21          | 0.00            | 0.94          | Excitatory amino acid transporter 1                                      | P56564     |
| Slc25a1  | -0.0113                          | 0.08            | 0.64          | -0.47           | <u>0.0280</u> | 0.39            | 0.36          | -0.40           | <u>0.0280</u> | Tricarboxylate transport protein, mitochondrial                          | Q8JZU2     |
| Slc25a10 | -0.8041                          | 0.40            | 0.53          | -2.89           | <u>0.0030</u> | 0.10            | 0.58          | -2.49           | <u>0.0130</u> | Mitochondrial dicarboxylate carrier                                      | Q9QZD8     |
| Slc25a11 | -4.3031                          | 0.74            | <u>0.0280</u> | -1.00           | <u>0.0002</u> | 0.31            | 0.24          | -0.27           | 0.25          | Mitochondrial 2-oxoglutarate/malate carrier protein                      | Q9CR62     |
| Slc25a12 | -7.2647                          | 0.73            | <u>0.0001</u> | -0.66           | <u>0.0002</u> | 0.21            | 0.25          | 0.06            | 0.42          | Calcium-binding mitochondrial carrier protein Aralar1                    | Q8BH59     |
| Slc25a18 | -2.3382                          | 0.32            | <u>0.0250</u> | -1.26           | <u>0.0002</u> | -0.31           | 0.2           | -0.94           | <u>0.0010</u> | Mitochondrial glutamate carrier 2                                        | Q9DB41     |
| Slc25a19 | -0.3489                          | 3.32            | 0.5           | -3.41           | 0.79          | 3.81            | 0.34          | -0.09           | 0.78          | Mitochondrial thiamine pyrophosphate carrier                             | Q9DAM5     |

Table S2: Differentially expressed proteins in cerebral cortex (*continued*)

| gene     | $\pi_{TW/EW} \times \pi_{TF/TW}$ | log2FC<br>TW/EW | padj<br>TW/EW | log2FC<br>TF/TW | padj<br>TF/TW | log2FC<br>EF/EW | padj<br>EF/EW | log2FC<br>TF/EW | padj<br>TF/EW | description                                                                                   | accession  |
|----------|----------------------------------|-----------------|---------------|-----------------|---------------|-----------------|---------------|-----------------|---------------|-----------------------------------------------------------------------------------------------|------------|
| Slc25a20 | -0.1387                          | 0.39            | 0.29          | -0.69           | 0.11          | -0.09           | 0.7           | -0.30           | 0.35          | Mitochondrial carnitine/acylcarnitine carrier protein                                         | Q9Z2Z6     |
| Slc25a22 | -0.1696                          | 0.44            | 0.23          | -0.63           | 0.11          | 0.30            | 0.28          | -0.19           | 0.6           | Mitochondrial glutamate carrier 1                                                             | Q9D6M3     |
| Slc25a23 | -0.0010                          | 0.15            | 0.81          | -0.20           | 0.45          | 0.16            | 1             | -0.05           | 0.64          | Calcium-binding mitochondrial carrier protein SCaMC-3                                         | Q6GQS1     |
| Slc25a3  | -0.5023                          | 0.31            | <u>0.0430</u> | -0.47           | <u>0.0030</u> | 0.36            | <u>0.0300</u> | -0.17           | 0.6           | Phosphate carrier protein, mitochondrial                                                      | G5E902     |
| Slc25a4  | -4.7523                          | 0.62            | <u>0.0020</u> | -0.71           | <u>0.0001</u> | 0.00            | 0.46          | -0.09           | 0.34          | ADP/ATP translocase 1                                                                         | P48962     |
| Slc25a46 | -0.0001                          | 0.39            | 0.93          | -0.19           | 0.89          | 0.38            | 0.26          | 0.19            | 0.92          | Solute carrier family 25 member 46                                                            | A0A3Q4L2U5 |
| Slc25a51 | -0.2402                          | 0.65            | 0.2           | -0.71           | 0.18          | 0.40            | 0.51          | -0.07           | 0.86          | Mitochondrial nicotinamide adenine dinucleotide transporter SLC25A51 (Fragment)               | G3UYJ3     |
| Slc27a4  | 0.0014                           | 0.28            | 0.16          | 0.06            | 0.79          | 0.17            | 0.5           | 0.34            | 0.062         | Long-chain fatty acid transport protein 4                                                     | Q91VE0     |
| Slc2a1   | -0.0001                          | 0.03            | 0.84          | -0.13           | 0.67          | 0.38            | 0.06          | -0.11           | 0.73          | Solute carrier family 2, facilitated glucose transporter member 1                             | P17809     |
| Slc2a3   | 0.0272                           | -0.64           | 0.055         | -0.10           | 0.46          | -0.20           | 0.7           | -0.74           | <u>0.0280</u> | Solute carrier family 2, facilitated glucose transporter member 3                             | P32037     |
| Slc32a1  | -0.1725                          | 0.52            | 0.095         | -0.45           | 0.19          | 0.59            | 0.28          | 0.08            | 0.91          | Vesicular inhibitory amino acid transporter                                                   | O35633     |
| Slc3a2   | 0.0821                           | -0.11           | 0.2           | -0.37           | <u>0.0013</u> | -0.24           | <u>0.0440</u> | -0.47           | <u>0.0009</u> | 4F2 cell-surface antigen heavy chain                                                          | P10852     |
| Slc4a1   | 0.0714                           | -0.65           | <u>0.0020</u> | -0.08           | 0.31          | -0.69           | <u>0.0016</u> | -0.73           | <u>0.0009</u> | Band 3 anion transport protein                                                                | P04919     |
| Slc4a10  | -0.0013                          | -0.10           | 0.82          | 0.42            | 0.44          | 0.42            | 0.26          | 0.32            | 0.15          | Sodium-driven chloride bicarbonate exchanger                                                  | Q5DTL9     |
| Slc4a3   | 0.0314                           | 1.90            | 0.49          | 0.47            | 0.77          | 1.29            | 0.33          | 2.38            | 0.14          | Anion exchange protein 3                                                                      | P16283     |
| Slc4a4   | 0.0001                           | 0.04            | 0.91          | 0.24            | 0.61          | -0.50           | <u>0.0280</u> | 0.28            | 0.31          | Anion exchange protein                                                                        | E9Q8N8     |
| Slc4a7   | -1.5308                          | -0.77           | 0.054         | 1.01            | <u>0.0280</u> | 0.58            | 0.32          | 0.24            | 0.42          | Anion exchange protein                                                                        | J9RV59     |
| Slc6a11  | -0.0806                          | 0.25            | 0.42          | -0.70           | 0.06          | 0.06            | 0.97          | -0.45           | <u>0.0490</u> | Sodium- and chloride-dependent GABA transporter 3                                             | P31650     |
| Slc8a1   | 0.0000                           | 0.03            | 0.85          | 0.01            | 0.98          | -0.21           | 0.28          | 0.04            | 0.7           | Na(+)/Ca(2+)-exchange protein 1                                                               | G3X9J1     |
| Slc8a2   | 0.0000                           | -0.12           | 0.58          | 0.06            | 0.95          | -0.03           | 0.81          | -0.06           | 0.51          | Sodium/calcium exchanger 2                                                                    | Q8K596     |
| Slc9a3r1 | 0.0514                           | 0.60            | 0.1           | 0.32            | 0.54          | 0.36            | 0.32          | 0.92            | <u>0.0390</u> | Na(+)/H(+) exchange regulatory cofactor NHE-RF1                                               | P70441     |
| Slk      | -0.1264                          | 0.67            | <u>0.0110</u> | -0.16           | 0.25          | 0.50            | 0.07          | 0.51            | 0.08          | STE20-like serine/threonine-protein kinase                                                    | O54988     |
| Slmap    | 0.0000                           | -0.02           | 0.9           | -0.11           | 0.54          | 0.08            | 0.8           | -0.13           | 0.5           | Sarcolemmal membrane-associated protein                                                       | H7BX64     |
| Smarca5  | -0.0301                          | 0.38            | 0.79          | -1.36           | 0.27          | -1.42           | 0.28          | -0.98           | 0.37          | SWI/SNF-related matrix-associated actin-dependent regulator of chromatin subfamily A member 5 | Q91ZW3     |
| Smarcc2  | 0.0000                           | -0.04           | 0.97          | -0.16           | 0.87          | -0.32           | 0.39          | -0.20           | 0.57          | SWI/SNF complex subunit SMARCC2                                                               | Q3UID0     |
| Smc1a    | 0.0004                           | 0.19            | 0.92          | 0.69            | 0.83          | -3.64           | 0.57          | 0.88            | 0.83          | Structural maintenance of chromosomes protein 1A                                              | Q9CU62     |

Table S2: Differentially expressed proteins in cerebral cortex (*continued*)

| gene    | $\pi_{TW/EW} \times \pi_{TF/TW}$ | log2FC<br>TW/EW | padj<br>TW/EW | log2FC<br>TF/TW | padj<br>TF/TW | log2FC<br>EF/EW | padj<br>EF/EW | log2FC<br>TF/EW | padj<br>TF/EW | description                                         | accession  |
|---------|----------------------------------|-----------------|---------------|-----------------|---------------|-----------------|---------------|-----------------|---------------|-----------------------------------------------------|------------|
| Smc3    | 0.0000                           | 0.24            | 0.28          | 0.02            | 0.99          | 0.06            | 0.9           | 0.26            | 0.25          | Structural maintenance of chromosomes protein 3     | Q9CW03     |
| Smdt1   | 0.0315                           | 0.29            | 0.65          | 0.83            | 0.2           | 0.11            | 0.87          | 1.12            | 0.056         | Essential MCU regulator, mitochondrial              | Q9DB10     |
| Snap25  | -0.0040                          | -0.19           | 0.53          | 0.26            | 0.51          | 0.04            | 0.61          | 0.07            | 0.71          | Synaptosomal-associated protein 25                  | P60879     |
| Snap47  | -0.0047                          | 0.42            | 0.39          | -0.24           | 0.77          | -0.27           | 0.81          | 0.17            | 0.51          | Synaptosomal-associated protein 47                  | Q8R570     |
| Snap91  | -0.0297                          | -0.04           | 0.66          | 1.03            | <u>0.0001</u> | 0.00            | 0.64          | 0.99            | <u>0.0001</u> | Clathrin coat assembly protein AP180                | A0A5F8MPL3 |
| Snca    | 0.0330                           | -0.43           | 0.39          | -0.22           | 0.14          | -0.40           | 0.11          | -0.66           | <u>0.0230</u> | Alpha-synuclein                                     | O55042     |
| Snca    | 0.0424                           | -0.36           | 0.064         | -0.15           | 0.22          | -0.35           | 0.064         | -0.50           | <u>0.0080</u> | Beta-synuclein                                      | Q91ZZ3     |
| Snd1    | 0.5091                           | 0.33            | 0.11          | 0.44            | <u>0.0002</u> | -0.07           | 0.63          | 0.77            | <u>0.0003</u> | Staphylococcal nuclease domain-containing protein 1 | Q78PY7     |
| Snph    | -0.0141                          | 0.13            | 0.94          | -2.25           | <u>0.0160</u> | -1.88           | 0.14          | -2.12           | <u>0.0100</u> | Syntaphilin                                         | Q80U23     |
| Snrk    | -1.7482                          | 0.98            | 0.14          | -1.75           | 0.064         | -0.61           | 0.35          | -0.77           | 0.41          | SNF-related serine/threonine-protein kinase         | Q8VDU5     |
| Snrnp70 | -0.4984                          | -0.51           | <u>0.0320</u> | 0.71            | 0.12          | -0.47           | <u>0.0340</u> | 0.20            | 0.98          | U1 small nuclear ribonucleoprotein 70 kDa           | Q62376     |
| Snrpa   | 0.1513                           | -0.84           | 0.65          | -2.70           | 0.44          | -1.36           | 0.52          | -3.54           | 0.22          | U1 small nuclear ribonucleoprotein A (Fragment)     | D3Z0S6     |
| Snrpa1  | -0.7507                          | -0.70           | <u>0.0260</u> | 0.57            | 0.065         | -0.50           | <u>0.0410</u> | -0.13           | 0.63          | U2 small nuclear ribonucleoprotein A'               | P57784     |
| Snrpd1  | -2.1251                          | -0.88           | <u>0.0420</u> | 0.93            | <u>0.0130</u> | -0.09           | 0.68          | 0.05            | 0.81          | Small nuclear ribonucleoprotein Sm D1               | P62315     |
| Snrpd3  | -0.0034                          | -0.38           | 0.72          | 0.41            | 0.7           | -0.29           | 0.86          | 0.03            | 0.96          | Small nuclear ribonucleoprotein Sm D3               | P62320     |
| Snrpe   | -0.0014                          | 0.78            | 0.69          | -0.36           | 0.93          | -1.18           | 0.35          | 0.42            | 0.71          | Small nuclear ribonucleoprotein E                   | P62305     |
| Snta1   | 0.0124                           | 0.08            | 0.53          | 0.28            | <u>0.0100</u> | 0.16            | 0.064         | 0.36            | <u>0.0001</u> | Alpha-1-syntrophin                                  | A2AKD7     |
| Sntb1   | 0.0035                           | -0.12           | 0.6           | -0.33           | 0.4           | -0.06           | 0.88          | -0.45           | 0.26          | Beta-1-syntrophin                                   | Q99L88     |
| Snu13   | 0.0000                           | -0.06           | 0.98          | 0.16            | 1             | 0.30            | 0.22          | 0.10            | 0.63          | NHP2-like protein 1                                 | Q9D0T1     |
| Snx1    | -0.0823                          | 0.65            | 0.46          | -0.97           | 0.41          | 0.34            | 0.72          | -0.32           | 0.91          | Sorting nexin-1                                     | Q6NZD2     |
| Snx12   | 0.3263                           | -0.26           | <u>0.0180</u> | -0.30           | <u>0.0040</u> | -0.15           | 0.17          | -0.56           | <u>0.0001</u> | Sorting nexin-12                                    | Q3TGS7     |
| Snx15   | 0.1923                           | -0.41           | 0.67          | -4.35           | 0.24          | -3.13           | 0.87          | -4.76           | 0.43          | Sorting nexin-15                                    | D3Z479     |
| Snx2    | -0.0127                          | 0.22            | 0.54          | -0.30           | 0.19          | 0.30            | 0.75          | -0.08           | 0.7           | Sorting nexin-2                                     | Q9CWK8     |
| Snx27   | -0.0017                          | 0.13            | 0.8           | -0.27           | 0.32          | -0.35           | 0.29          | -0.14           | 0.47          | Sorting nexin-27                                    | Q3UHD6     |
| Snx3    | 0.1992                           | -0.25           | 0.079         | -0.42           | <u>0.0190</u> | -0.37           | 0.098         | -0.67           | <u>0.0001</u> | Sorting nexin-3                                     | Q78ZM0     |
| Snx5    | 0.0001                           | 0.07            | 0.85          | 0.11            | 0.57          | 0.05            | 0.72          | 0.18            | 0.69          | Sorting nexin-5                                     | Q9D8U8     |
| Snx6    | 0.0002                           | 0.02            | 0.9           | 0.24            | 0.12          | 0.03            | 0.67          | 0.26            | 0.094         | Sorting nexin-6                                     | A0A1W2P701 |
| Snx9    | -0.9590                          | 5.02            | <u>0.0280</u> | -0.52           | 0.58          | 2.37            | 0.54          | 4.50            | 0.21          | Sorting nexin-9                                     | Q91VH2     |
| Sod1    | 0.0002                           | 0.02            | 0.89          | 0.28            | 0.19          | 0.12            | 0.42          | 0.30            | 0.17          | Superoxide dismutase [Cu-Zn]                        | P08228     |
| Soga1   | -0.0028                          | 0.10            | 0.92          | -3.64           | 0.61          | 0.10            | 0.95          | -3.54           | 0.68          | Protein SOGA1                                       | A2ACV6     |
| Soga3   | 0.0000                           | -0.06           | 0.93          | -0.18           | 1             | -0.12           | 0.45          | -0.24           | <u>0.0060</u> | Protein SOGA3                                       | Q6NZL0     |
| Sorbs1  | -4.9849                          | 1.80            | 0.13          | -2.45           | 0.053         | 0.49            | 0.56          | -0.66           | 0.56          | Sorbin and SH3 domain-containing protein 1          | A0A286YCI8 |
| Sorbs2  | -8.2492                          | 1.39            | 0.053         | -1.94           | <u>0.0040</u> | 0.28            | 0.62          | -0.55           | 0.27          | Sorbin and SH3 domain-containing protein 2          | B7ZWM6     |

Table S2: Differentially expressed proteins in cerebral cortex (*continued*)

| gene    | $\pi_{\text{TF}/\text{EW}} \times \pi_{\text{TF}/\text{TW}}$ | log2FC<br>TW/EW | padj<br>TW/EW | log2FC<br>TF/TW | padj<br>TF/TW | log2FC<br>EF/EW | padj<br>EF/EW | log2FC<br>TF/EW | padj<br>TF/EW | description                                                 | accession  |
|---------|--------------------------------------------------------------|-----------------|---------------|-----------------|---------------|-----------------|---------------|-----------------|---------------|-------------------------------------------------------------|------------|
| Sorcs1  | 0.0002                                                       | -0.30           | 0.65          | -0.02           | 0.66          | -0.40           | 0.6           | -0.32           | 0.37          | VPS10 domain-containing receptor<br>SorCS1                  | A0A1B0GRB7 |
| Sorcs2  | 0.0014                                                       | 0.23            | 0.19          | 0.09            | 0.8           | -0.12           | 0.67          | 0.33            | 0.16          | VPS10 domain-containing receptor<br>SorCS2                  | Q9EPR5     |
| Sorl1   | -8.0493                                                      | 6.13            | 0.11          | -1.78           | 0.17          | 3.64            | 0.75          | 4.35            | 0.71          | Sortilin-related receptor                                   | O88307     |
| Sos1    | 0.3269                                                       | 1.00            | 0.16          | 0.40            | 0.094         | 0.39            | 0.49          | 1.40            | <u>0.0190</u> | Son of sevenless homolog 1                                  | Q62245     |
| Sowaha  | 0.0007                                                       | -0.03           | 0.94          | -0.96           | 0.14          | -0.84           | 0.43          | -0.99           | <u>0.0280</u> | Ankyrin repeat domain-containing protein<br>SOWAHA          | Q8BLS7     |
| Spast   | -7.5642                                                      | 1.58            | <u>0.0220</u> | -1.70           | <u>0.0200</u> | 0.73            | 0.47          | -0.12           | 0.84          | Spastin                                                     | A0A286YE25 |
| Spata2l | -0.3943                                                      | 0.85            | 0.48          | -1.26           | 0.07          | -0.05           | 0.46          | -0.41           | 0.31          | Spermatogenesis-associated protein 2-like<br>protein        | Q8BNN1     |
| Spcs2   | 0.0343                                                       | 0.42            | 0.23          | 0.39            | 0.47          | -0.12           | 0.93          | 0.81            | 0.21          | Microsomal signal peptidase 25 kDa<br>subunit               | A0A140LHG8 |
| Specc1  | -0.2431                                                      | 0.50            | 0.062         | -0.42           | 0.11          | 0.06            | 0.86          | 0.08            | 0.63          | Cytospin-B                                                  | A0A0J9YTU3 |
| Speg    | -0.3456                                                      | 0.28            | 0.56          | -2.13           | <u>0.0050</u> | -0.18           | 0.47          | -1.85           | <u>0.0070</u> | Striated muscle-specific<br>serine/threonine-protein kinase | Q62407     |
| Spg7    | -0.0173                                                      | 0.42            | 0.3           | -0.27           | 0.51          | -0.12           | 0.67          | 0.14            | 0.45          | Paraplegin                                                  | D3YZN4     |
| Sphk2   | -0.0332                                                      | 0.62            | 0.33          | -0.47           | 0.58          | 0.30            | 0.37          | 0.15            | 0.56          | Sphingosine kinase 2                                        | Q9JIA7     |
| Sphkap  | -1.3082                                                      | 1.23            | 0.32          | -1.94           | 0.078         | 0.42            | 0.62          | -0.71           | 0.2           | A-kinase anchor protein SPHKAP                              | E9PUC4     |
| Spire1  | -0.1624                                                      | 0.50            | 0.74          | -2.32           | 0.085         | 0.71            | 0.14          | -1.83           | 0.091         | Protein spire homolog 1                                     | A0A5H1ZRL1 |
| Spon1   | 0.0010                                                       | 0.04            | 0.91          | 1.27            | 0.34          | -0.27           | 0.94          | 1.31            | 0.23          | Spondin-1                                                   | Q8VCC9     |
| Spr     | 0.0000                                                       | -0.12           | 0.93          | 0.04            | 0.72          | -0.38           | 0.28          | -0.08           | 0.86          | Sepiapterin reductase                                       | G3UXX3     |
| Spta1   | 0.2655                                                       | -0.15           | 0.31          | -0.87           | <u>0.0001</u> | 0.56            | <u>0.0450</u> | -1.02           | <u>0.0010</u> | Spectrin alpha chain, erythrocytic 1                        | P08032     |
| Sptan1  | -4.2336                                                      | 0.42            | <u>0.0001</u> | -0.63           | <u>0.0001</u> | 0.56            | <u>0.0004</u> | -0.20           | <u>0.0054</u> | Spectrin alpha chain, non-erythrocytic 1                    | A3KGU9     |
| Sptb    | 0.0008                                                       | -0.10           | 0.99          | -0.75           | <u>0.0030</u> | 0.59            | 0.05          | -0.86           | <u>0.0010</u> | Spectrin beta chain                                         | Q3UGX2     |
| Sptbn1  | -4.0704                                                      | 0.48            | <u>0.0001</u> | -0.53           | <u>0.0001</u> | 0.65            | <u>0.0001</u> | -0.05           | 0.8           | Spectrin beta chain, non-erythrocytic 1                     | Q62261     |
| Sptbn2  | -8.5376                                                      | 0.58            | <u>0.0001</u> | -0.92           | <u>0.0001</u> | 0.49            | <u>0.0002</u> | -0.34           | <u>0.0050</u> | Spectrin beta chain                                         | Q68FG2     |
| Sptbn4  | -0.4787                                                      | 0.43            | 0.13          | -0.71           | <u>0.0170</u> | 0.30            | 0.28          | -0.28           | 0.37          | Spectrin beta chain                                         | E9PX29     |
| Src     | -0.0003                                                      | 0.04            | 0.64          | -0.11           | 0.39          | 0.00            | 0.91          | -0.08           | 0.94          | Neuronal proto-oncogene tyrosine-protein<br>kinase Src      | P05480     |
| Srcin1  | -3.5829                                                      | 4.06            | 0.4           | -4.36           | 0.31          | 1.88            | 0.44          | -0.31           | 1             | SRC kinase-signaling inhibitor 1                            | A0A571BDG0 |
| Srgap2  | 0.0016                                                       | 0.23            | 0.73          | 0.29            | 0.66          | 0.90            | <u>0.0440</u> | 0.53            | 0.56          | SLIT-ROBO Rho GTPase-activating<br>protein 2                | Q91Z67     |
| Srgap3  | -18.2282                                                     | 2.03            | <u>0.0001</u> | -1.25           | <u>0.0160</u> | 0.38            | 0.57          | 0.77            | 0.085         | SLIT-ROBO Rho GTPase-activating<br>protein 3                | E9QN14     |
| Srm     | 0.1648                                                       | -1.02           | 0.58          | -2.98           | 0.59          | -0.05           | 0.69          | -4.00           | 0.22          | Spermidine synthase                                         | Q64674     |
| Srp54   | -0.0254                                                      | -0.18           | 0.85          | 0.74            | <u>0.0020</u> | 0.24            | 0.18          | 0.56            | <u>0.0017</u> | Signal recognition particle 54 kDa protein                  | P14576     |
| Srp72   | 0.0027                                                       | 0.94            | <u>0.0028</u> | 0.05            | 0.95          | 0.38            | 0.14          | 0.99            | <u>0.0035</u> | Signal recognition particle subunit SRP72                   | E9Q740     |
| Srpk2   | -0.0308                                                      | 0.35            | 0.34          | -0.39           | 0.33          | -0.16           | 0.69          | -0.04           | 0.96          | SRSF protein kinase 2                                       | A0A0R4J124 |

Table S2: Differentially expressed proteins in cerebral cortex (*continued*)

| gene   | $\pi_{TW/EW} \times \pi_{TF/TW}$ | log2FC<br>TW/EW | padj<br>TW/EW | log2FC<br>TF/TW | padj<br>TF/TW | log2FC<br>EF/EW | padj<br>EF/EW | log2FC<br>TF/EW | padj<br>TF/EW | description                                        | accession  |
|--------|----------------------------------|-----------------|---------------|-----------------|---------------|-----------------|---------------|-----------------|---------------|----------------------------------------------------|------------|
| Srrm2  | 0.3132                           | 0.70            | 0.25          | 0.64            | 0.069         | 0.15            | 0.66          | 1.34            | <u>0.0040</u> | Serine/arginine repetitive matrix protein 2        | Q8BTI8     |
| Srsf1  | -0.1455                          | 0.50            | 0.7           | -1.60           | 0.067         | -1.81           | 0.085         | -1.11           | 0.14          | Serine/arginine-rich splicing factor 1             | H7BX95     |
| Srsf2  | 0.0000                           | -0.26           | 0.72          | -0.02           | 1             | -0.74           | 0.13          | -0.27           | 0.54          | Serine/arginine-rich splicing factor 2             | Q62093     |
| Srsf3  | -0.7034                          | 0.92            | 0.19          | -1.06           | 0.1           | -1.54           | <u>0.0035</u> | -0.14           | 0.41          | Serine/arginine-rich splicing factor 3             | P84104     |
| Srsf4  | -0.8034                          | 8.40            | 0.18          | -0.64           | 0.63          | 4.30            | 0.33          | 7.76            | 0.24          | Serine/arginine-rich-splicing factor 4             | Q542V3     |
| Srsf7  | -0.0221                          | 0.64            | 0.76          | -0.79           | 0.43          | -1.07           | 0.05          | -0.15           | 0.4           | Serine/arginine-rich-splicing factor 7             | A0A3Q4L393 |
| Ssb    | -0.0255                          | 0.36            | 0.79          | -0.96           | 0.19          | -1.39           | <u>0.0110</u> | -0.60           | 0.33          | Lupus La protein homolog                           | P32067     |
| Ssbp1  | -0.2843                          | 0.28            | 0.1           | -0.77           | <u>0.0480</u> | -0.01           | 0.87          | -0.49           | 0.17          | Single-stranded DNA-binding protein, mitochondrial | Q9CYR0     |
| Ssr3   | 3.5064                           | 5.54            | <u>0.0280</u> | 0.46            | 0.13          | 4.23            | 0.19          | 6.00            | <u>0.0280</u> | Translocon-associated protein subunit gamma        | Q9DCF9     |
| Ssr4   | 0.0381                           | 0.32            | 0.13          | 0.32            | 0.38          | 0.06            | 0.81          | 0.65            | 0.062         | Translocon-associated protein subunit delta        | Q62186     |
| Sst    | -0.0062                          | 0.08            | 0.87          | -0.75           | <u>0.0190</u> | -0.41           | 0.1           | -0.67           | <u>0.0053</u> | Somatostatin                                       | P60041     |
| St13   | 0.0039                           | 0.09            | 0.65          | 0.25            | 0.12          | 0.21            | 0.96          | 0.35            | <u>0.0310</u> | Hsc70-interacting protein                          | F8WJK8     |
| Stambp | -0.0093                          | 0.31            | 0.26          | -0.23           | 0.6           | -0.50           | 0.059         | 0.08            | 0.57          | STAM-binding protein                               | Q9CQ26     |
| Stau2  | -0.0022                          | 0.17            | 0.65          | -0.28           | 0.57          | 0.50            | 0.48          | -0.11           | 0.81          | Double-stranded RNA-binding protein                | E2QRQ3     |
|        |                                  |                 |               |                 |               |                 |               |                 |               | Staufen homolog 2                                  |            |
| Stim2  | -4.1109                          | 2.23            | 0.085         | -1.87           | 0.12          | -0.29           | 0.8           | 0.36            | 0.51          | Stromal interaction molecule 2                     | I1E4X8     |
| Stip1  | -0.0098                          | 0.18            | 0.21          | -0.08           | 0.1           | 0.01            | 0.77          | 0.10            | 0.71          | Stress-induced-phosphoprotein 1                    | Q60864     |
| Stk24  | -0.0140                          | 1.06            | 0.23          | -0.24           | 0.82          | 0.84            | 0.31          | 0.81            | 0.45          | Serine/threonine-protein kinase 24                 | Q99KH8     |
| Stmn1  | -0.0013                          | -0.37           | 0.38          | 0.31            | 0.94          | -0.09           | 0.71          | -0.07           | 0.34          | Stathmin                                           | P54227     |
| Stmn3  | 0.0000                           | -0.20           | 0.7           | -0.13           | 0.99          | 0.00            | 0.77          | -0.33           | 0.85          | Stathmin-3                                         | O70166     |
| Stmn4  | -0.0788                          | 0.31            | 0.087         | -0.25           | 0.11          | -0.02           | 0.85          | 0.06            | 0.56          | Stathmin-4                                         | P63042     |
| Stoml2 | 0.0006                           | 0.18            | 0.88          | 0.27            | 0.58          | 0.04            | 0.83          | 0.45            | 0.51          | Stomatin-like protein 2, mitochondrial             | Q99JB2     |
| Strap  | -0.0018                          | -0.09           | 0.69          | 0.25            | 0.31          | 0.04            | 0.74          | 0.16            | 0.57          | Serine-threonine kinase                            | Q9Z1Z2     |
|        |                                  |                 |               |                 |               |                 |               |                 |               | receptor-associated protein                        |            |
| Strbp  | -0.0001                          | -0.03           | 0.93          | 0.83            | 0.69          | 0.23            | 0.74          | 0.80            | 0.31          | Spermatid perinuclear RNA-binding protein          | Q91WM1     |
| Strip1 | -0.0002                          | 0.01            | 0.79          | -0.40           | 0.26          | -0.27           | 0.65          | -0.39           | 0.49          | Striatin-interacting protein 1                     | Q8C079     |
| Strn   | -0.3280                          | 1.23            | 0.17          | -0.76           | 0.35          | 0.77            | 0.25          | 0.48            | 0.57          | Striatin                                           | O55106     |
| Strn3  | -0.3552                          | 0.29            | 0.28          | -1.07           | <u>0.0085</u> | 0.25            | 0.62          | -0.79           | 0.25          | Striatin-3                                         | B2RQS1     |
| Strn4  | 0.0003                           | -0.02           | 0.85          | -0.28           | 0.15          | -0.26           | 0.26          | -0.30           | 0.086         | Striatin-4                                         | P58404     |
| Stub1  | 0.0001                           | -0.02           | 0.75          | -0.09           | 0.32          | 0.20            | 0.092         | -0.11           | 0.72          | STIP1 homology and U box-containing protein 1      | A0A494BBF6 |
| Stum   | -0.0854                          | -0.37           | 0.25          | 0.40            | 0.11          | 0.18            | 0.54          | 0.03            | 0.97          | Protein stum homolog                               | J3QP43     |
| Stx12  | 0.0022                           | 0.04            | 0.39          | 0.29            | 0.34          | 0.62            | 0.22          | 0.33            | 0.4           | Syntaxin-12                                        | Q9ER00     |
| Stx1b  | 0.0001                           | 0.05            | 0.2           | 0.23            | 0.96          | 0.21            | 0.28          | 0.27            | 0.26          | Syntaxin-1B                                        | P61264     |
| Stx6   | 0.0000                           | -0.01           | 0.91          | 0.19            | 0.78          | 0.49            | 0.66          | 0.18            | 0.86          | Syntaxin-6                                         | A0A0A6YXG0 |



Table S2: Differentially expressed proteins in cerebral cortex (*continued*)

| gene    | $\pi_{TW/EW} \times \pi_{TF/TW}$ | log2FC<br>TW/EW | padj<br>TW/EW | log2FC<br>TF/TW | padj<br>TF/TW | log2FC<br>EF/EW | padj<br>EF/EW | log2FC<br>TF/EW | padj<br>TF/EW | description                                                               | accession  |
|---------|----------------------------------|-----------------|---------------|-----------------|---------------|-----------------|---------------|-----------------|---------------|---------------------------------------------------------------------------|------------|
| Stx7    | 0.0323                           | 0.36            | 0.35          | 0.29            | 0.21          | 0.37            | 0.24          | 0.65            | 0.084         | Syntaxin-7                                                                | O70439     |
| Stxbp1  | 0.0004                           | 0.01            | 0.55          | 0.29            | 0.32          | -0.11           | 0.12          | 0.30            | 0.17          | Syntaxin-binding protein 1                                                | O08599     |
| Stxbp3  | 0.0073                           | -0.27           | 0.47          | -0.30           | 0.53          | -0.89           | 0.075         | -0.57           | 0.16          | Syntaxin-binding protein 3                                                | Q60770     |
| Stxbp5  | -0.0002                          | -0.02           | 0.88          | 0.55            | 0.48          | 0.71            | <u>0.0170</u> | 0.53            | <u>0.0380</u> | Syntaxin-binding protein 5                                                | Q8K400     |
| Stxbp6  | 0.0000                           | 0.18            | 0.9           | -0.07           | 0.97          | 0.60            | 0.63          | 0.10            | 0.94          | Syntaxin-binding protein 6                                                | Q3TYA4     |
| Sucla2  | -1.4976                          | 0.24            | <u>0.0010</u> | -0.52           | <u>0.0001</u> | 0.09            | 0.93          | -0.28           | <u>0.0001</u> | Succinate-CoA ligase [ADP-forming]<br>subunit beta, mitochondrial         | Q9Z2I9     |
| Suclg1  | -1.9588                          | 0.38            | <u>0.0060</u> | -0.58           | <u>0.0001</u> | 0.33            | <u>0.0180</u> | -0.20           | 0.13          | Succinate-CoA ligase<br>[ADP/GDP-forming] subunit alpha,<br>mitochondrial | Q9WUM5     |
| Sumo1   | -0.0013                          | -0.38           | 0.45          | 0.08            | 0.76          | -0.14           | 0.77          | -0.29           | 0.55          | Small ubiquitin-related modifier 1                                        | P63166     |
| Sumo3   | -0.4156                          | -0.75           | <u>0.0010</u> | 0.24            | 0.17          | -0.24           | <u>0.0410</u> | -0.51           | <u>0.0010</u> | Small ubiquitin-related modifier 3                                        | G3UWI9     |
| Susd2   | 0.0253                           | 0.28            | 0.41          | 0.41            | 0.27          | 0.42            | 0.2           | 0.69            | 0.087         | Sushi domain-containing protein 2                                         | Q9DBX3     |
| Sv2a    | 0.0000                           | 0.01            | 0.81          | -0.02           | 0.83          | 0.01            | 0.91          | -0.01           | 0.98          | Synaptic vesicle glycoprotein 2A                                          | Q9JIS5     |
| Sv2b    | 0.0000                           | -0.23           | 0.65          | -0.03           | 0.92          | -0.07           | 0.9           | -0.26           | 0.43          | Synaptic vesicle glycoprotein 2B                                          | Q8BG39     |
| Svip    | -0.0471                          | -0.76           | 0.086         | 0.30            | 0.64          | -0.98           | 0.11          | -0.46           | 0.5           | Small VCP/p97-interacting protein                                         | Q3UZP4     |
| Syn1    | 0.0000                           | 0.00            | <u>0.0150</u> | -0.08           | <u>0.0040</u> | 0.16            | 0.55          | -0.08           | 0.98          | Synapsin-1                                                                | O88935     |
| Syn2    | -0.0158                          | 0.06            | 0.3           | -0.28           | <u>0.0160</u> | -0.21           | 0.39          | -0.22           | 0.34          | Synapsin-2                                                                | Q64332     |
| Syn3    | -21.4623                         | 5.27            | <u>0.0150</u> | -2.52           | 0.13          | 3.99            | 0.19          | 2.75            | 0.39          | Synapsin-3                                                                | Q8JZP2     |
| Syncrip | -0.4156                          | 0.76            | 0.39          | -1.00           | <u>0.0460</u> | 0.17            | 0.83          | -0.24           | 0.52          | Heterogeneous nuclear ribonucleoprotein<br>Q                              | A0A0R4J259 |
| Syne1   | -0.4927                          | 0.28            | <u>0.0410</u> | -0.47           | <u>0.0020</u> | 0.11            | 0.18          | -0.19           | 1             | Nesprin-1                                                                 | A0A1L1STC6 |
| Syne2   | -0.0120                          | -0.19           | 0.5           | 0.32            | 0.22          | 0.18            | 0.068         | 0.13            | 0.17          | Nesprin-2                                                                 | E9QP46     |
| Syngap1 | -35.8968                         | 2.76            | 0.089         | -5.38           | <u>0.0050</u> | -2.18           | 0.47          | -2.62           | 0.19          | Ras/Rap GTPase-activating protein<br>SynGAP                               | F6SEU4     |
| Syngr1  | 0.0000                           | -0.48           | 0.56          | 0.00            | 0.86          | 0.09            | 0.7           | -0.49           | 0.55          | Synaptogyrin-1                                                            | O55100     |
| Syngr3  | 0.0020                           | -0.15           | 0.15          | -0.08           | 0.63          | -0.06           | 0.69          | -0.22           | <u>0.0290</u> | Synaptogyrin-3                                                            | Q8R191     |
| Synj1   | -47.7789                         | 7.06            | <u>0.0120</u> | -5.52           | 0.23          | 1.70            | 0.085         | 1.54            | 0.084         | Phosphoinositide 5-phosphatase                                            | D3Z656     |
| Synpo   | -4.3430                          | 0.95            | <u>0.0250</u> | -1.19           | <u>0.0040</u> | 0.98            | <u>0.0080</u> | -0.24           | 0.57          | Synaptopodin                                                              | E9Q3E2     |
| Syp     | 0.0015                           | -0.15           | 0.91          | -0.32           | 0.17          | -0.04           | 0.82          | -0.48           | 0.24          | Synaptophysin                                                             | Q62277     |
| Syt1    | -0.0266                          | 0.55            | 0.3           | -0.12           | 0.17          | 0.33            | 0.67          | 0.43            | 0.55          | Synaptotagmin-1                                                           | P46096     |
| Syt11   | 0.0029                           | -0.11           | 0.81          | -0.50           | 0.27          | 0.10            | 0.47          | -0.60           | 0.079         | Synaptotagmin-11                                                          | Q9R0N3     |
| Syt17   | -0.0002                          | -0.14           | 0.74          | 0.10            | 0.8           | 0.58            | 0.21          | -0.04           | 1             | Synaptotagmin XVII (Fragment)                                             | A0A140LJ89 |
| Syt3    | -0.1509                          | -0.29           | 0.17          | 0.54            | 0.056         | 0.44            | 0.062         | 0.24            | 0.27          | Synaptotagmin-3                                                           | G3X9Y1     |
| Syt7    | -5.7090                          | 2.27            | 0.16          | -3.16           | 0.1           | 0.79            | 0.66          | -0.89           | 0.61          | Synaptotagmin-7                                                           | A0A494BB44 |
| Tagln3  | -0.1965                          | 0.16            | 0.61          | -1.43           | <u>0.0001</u> | -0.09           | 0.53          | -1.27           | <u>0.0010</u> | Transgelin-3                                                              | Q9R1Q8     |
| Taldo1  | -0.0379                          | -0.42           | <u>0.0007</u> | 0.07            | 0.39          | -0.22           | 0.07          | -0.35           | <u>0.0010</u> | Transaldolase                                                             | A0A1B0GR11 |
| Tanc2   | -19.9681                         | 1.44            | <u>0.0270</u> | -2.21           | <u>0.0001</u> | -0.37           | 0.32          | -0.77           | <u>0.0440</u> | Protein TANC2                                                             | A2A690     |

Table S2: Differentially expressed proteins in cerebral cortex (*continued*)

| gene     | $\pi_{TW/EW} \times \pi_{TF/TW}$ | log2FC<br>TW/EW | padj<br>TW/EW | log2FC<br>TF/TW | padj<br>TF/TW | log2FC<br>EF/EW | padj<br>EF/EW | log2FC<br>TF/EW | padj<br>TF/EW | description                                         | accession  |
|----------|----------------------------------|-----------------|---------------|-----------------|---------------|-----------------|---------------|-----------------|---------------|-----------------------------------------------------|------------|
| Taok2    | -0.2081                          | 0.87            | 0.53          | -1.40           | 0.24          | -0.19           | 0.97          | -0.53           | 0.42          | Serine/threonine-protein kinase TAO2                | Q6ZQ29     |
| Tardbp   | 0.0018                           | 0.43            | 0.37          | 0.12            | 0.83          | 1.03            | 0.11          | 0.55            | 0.23          | TAR DNA-binding protein 43                          | Q921F2     |
| Tars1    | -0.0166                          | 0.18            | 0.22          | -0.22           | 0.23          | 0.00            | 0.67          | -0.04           | 0.74          | Threonine-tRNA ligase 1, cytoplasmic                | Q9D0R2     |
| Tars2    | -0.0927                          | 0.33            | 0.52          | -0.98           | 0.098         | -0.04           | 0.87          | -0.65           | 0.1           | Threonine-tRNA ligase, mitochondrial                | Q3UQ84     |
| Tars3    | -0.0933                          | 0.65            | 0.55          | -1.00           | 0.28          | -0.08           | 0.96          | -0.34           | 0.47          | Threonine-tRNA ligase 2, cytoplasmic                | Q8BLY2     |
| Tbc1d10b | -0.0319                          | 0.37            | 0.16          | -0.18           | 0.25          | -0.23           | 0.63          | 0.18            | 0.58          | TBC1 domain family member 10B                       | Q8BHL3     |
| Tbc1d24  | -0.0006                          | 0.03            | 0.94          | -0.91           | 0.16          | 0.07            | 0.77          | -0.88           | 0.22          | TBC1 domain family member 24                        | Q3UUG6     |
| Tbca     | -2.2125                          | 0.96            | 0.69          | -9.21           | <u>0.0280</u> | 0.15            | 0.59          | -8.24           | <u>0.0280</u> | Tubulin-specific chaperone A                        | P48428     |
| Tbcb     | 0.0390                           | 0.89            | 0.54          | 0.56            | 0.51          | 0.95            | 0.36          | 1.45            | 0.21          | Tubulin-folding cofactor B                          | Q9D1E6     |
| Tbck     | 0.0000                           | 0.13            | 0.96          | -0.14           | 0.77          | -0.08           | 0.84          | -0.01           | 0.93          | TBC domain-containing protein kinase-like protein   | E9Q1W7     |
| Tbl2     | -0.0195                          | 0.23            | 0.14          | -0.19           | 0.3           | -0.30           | 0.58          | 0.04            | 0.7           | Transducin beta-like protein 2                      | Q9R099     |
| Tcea1    | 0.0045                           | -0.19           | 0.66          | -0.70           | 0.65          | -0.34           | 0.6           | -0.90           | 0.56          | Transcription elongation factor A protein 1         | P10711     |
| Tcea5    | 0.0002                           | 0.04            | 0.9           | 0.21            | 0.35          | 0.29            | 0.47          | 0.25            | 0.78          | Transcription elongation factor A protein-like 5    | Q8CCT4     |
| Tcerg1   | -0.0003                          | -0.21           | 0.87          | 0.31            | 0.83          | 0.09            | 0.6           | 0.10            | 0.96          | Transcription elongation regulator 1                | Q8CGF7     |
| Tcf25    | -0.4828                          | 0.81            | 0.088         | -0.54           | 0.09          | -0.27           | 0.81          | 0.27            | 0.71          | Nuclear localized protein-1 isoform d (Fragment)    | B2ZAC8     |
| Tcof1    | 0.0258                           | 0.45            | 0.16          | 0.22            | 0.47          | 0.36            | 0.056         | 0.67            | <u>0.0040</u> | Treacle protein                                     | H3BL37     |
| Tcp1     | -0.0003                          | -0.14           | 0.93          | 0.11            | 0.28          | 0.00            | 0.9           | -0.03           | 0.33          | T-complex protein 1 subunit alpha                   | P11983     |
| Tdrkh    | -1.3181                          | 4.41            | <u>0.0060</u> | -0.46           | 0.51          | 0.36            | 0.72          | 3.95            | <u>0.0300</u> | Tudor and KH domain-containing protein              | A0A0G2JFB2 |
| Tecpr1   | -0.0216                          | -0.33           | 0.089         | 0.17            | 0.43          | 0.40            | 0.14          | -0.15           | 0.5           | Tectonin beta-propeller repeat-containing protein 1 | Q80VP0     |
| Tecr     | -0.5221                          | 0.52            | <u>0.0100</u> | -0.43           | 0.068         | -0.09           | 0.62          | 0.09            | 0.47          | Very-long-chain enoyl-CoA reductase                 | A0A5F8MQC8 |
| Tenm1    | -0.1577                          | 1.07            | 0.41          | -1.01           | 0.42          | -0.68           | 0.68          | 0.06            | 0.9           | Teneurin-1                                          | A2ANL9     |
| Tenm2    | -0.0396                          | 0.35            | 0.26          | -0.37           | 0.3           | -0.08           | 0.84          | -0.02           | 0.91          | Teneurin-2                                          | A0A0A0MQ92 |
| Tenm3    | 0.0000                           | 0.21            | 0.28          | -0.02           | 0.97          | -0.39           | 0.47          | 0.19            | 0.26          | Odz3 protein                                        | B7ZNJ5     |
| Tenm4    | -0.6852                          | 0.65            | <u>0.0280</u> | -0.45           | <u>0.0310</u> | 0.03            | 0.75          | 0.20            | 0.62          | Teneurin-4                                          | Q3UHK6     |
| Tf       | -0.1183                          | -0.52           | <u>0.0001</u> | 0.10            | 0.27          | -0.68           | <u>0.0007</u> | -0.42           | <u>0.0010</u> | Serotransferrin                                     | Q921I1     |
| Tfam     | -2.4956                          | 1.07            | <u>0.0010</u> | -0.74           | 0.089         | 0.22            | 0.23          | 0.33            | <u>0.0016</u> | Transcription factor A, mitochondrial               | P40630     |
| Tfg      | -0.0896                          | 0.53            | 0.13          | -0.29           | 0.22          | 0.39            | 0.47          | 0.24            | 0.5           | Trk-fused gene (Fragment)                           | B8JJG8     |
| Tfrc     | -0.0016                          | -1.20           | 0.51          | 0.08            | 0.88          | -4.49           | 0.21          | -1.11           | 0.69          | Transferrin receptor protein 1                      | Q62351     |
| Them4    | 2.2694                           | -0.86           | 0.13          | -3.87           | 0.17          | -1.67           | 0.16          | -4.73           | <u>0.0240</u> | Acyl-coenzyme A thioesterase THEM4                  | Q3UUI3     |
| Them6    | -0.0145                          | 1.02            | 0.073         | -0.11           | 0.77          | 0.76            | 0.27          | 0.91            | 0.07          | Protein THEM6                                       | Q80ZW2     |
| Thop1    | -0.0845                          | -0.63           | <u>0.0023</u> | 0.19            | 0.54          | -0.13           | 0.59          | -0.44           | 0.06          | Thimet oligopeptidase                               | A0A0R4IZY0 |
| Thrap3   | -0.0646                          | 0.39            | 0.27          | -0.43           | 0.21          | -0.09           | 0.69          | -0.04           | 0.83          | Thyroid hormone receptor-associated protein 3       | Q569Z6     |

Table S2: Differentially expressed proteins in cerebral cortex (*continued*)

| gene     | $\pi_{TW/EW} \times \pi_{TF/TW}$ | log2FC<br>TW/EW | padj<br>TW/EW | log2FC<br>TF/TW | padj<br>TF/TW | log2FC<br>EF/EW | padj<br>EF/EW | log2FC<br>TF/EW | padj<br>TF/EW | description                                                        | accession  |
|----------|----------------------------------|-----------------|---------------|-----------------|---------------|-----------------|---------------|-----------------|---------------|--------------------------------------------------------------------|------------|
| Thsd7a   | 0.0002                           | 0.01            | 0.79          | 0.21            | 0.2           | 0.31            | <u>0.0030</u> | 0.23            | 0.15          | Thrombospondin type-1 domain-containing protein 7A                 | E9PWD2     |
| Thy1     | -0.0442                          | 0.34            | 0.18          | -0.29           | 0.25          | -0.05           | 0.73          | 0.06            | 0.38          | Thy-1 membrane glycoprotein                                        | P01831     |
| Tial1    | -2.0240                          | 3.64            | 0.62          | -4.71           | 0.27          | 3.94            | 0.52          | -1.07           | 0.78          | Nucleolysin TIAR                                                   | P70318     |
| Timm10   | -0.0407                          | -0.27           | 0.35          | 0.43            | 0.17          | 0.12            | 0.98          | 0.16            | 0.42          | Mitochondrial import inner membrane translocase subunit Tim10      | P62073     |
| Timm44   | -0.0509                          | 0.94            | 0.32          | -0.24           | 0.35          | -0.21           | 0.89          | 0.70            | 0.65          | Mitochondrial import inner membrane translocase subunit TIM44      | O35857     |
| Timm8a1  | 0.0390                           | -0.29           | 0.85          | -2.81           | 0.21          | -0.84           | 0.35          | -3.10           | 0.19          | Mitochondrial import inner membrane translocase subunit Tim8 A     | Q9WVA2     |
| Timm8b   | -0.0009                          | 0.03            | 0.72          | -0.31           | 0.22          | 0.50            | 0.17          | -0.28           | 0.34          | Mitochondrial import inner membrane translocase subunit Tim8 B     | P62077     |
| Timm9    | -0.0017                          | -0.04           | 0.81          | 0.44            | 0.083         | 0.26            | 0.59          | 0.39            | <u>0.0440</u> | Mitochondrial import inner membrane translocase subunit Tim9       | Q9WV98     |
| Tjp1     | -9.3886                          | 1.89            | 0.059         | -2.18           | <u>0.0140</u> | 0.24            | 0.53          | -0.29           | 0.27          | Tight junction protein ZO-1                                        | B9EHJ3     |
| Tjp2     | -19.4769                         | 1.69            | 0.18          | -7.38           | <u>0.0080</u> | 0.63            | 0.43          | -5.69           | 0.085         | Tight junction protein ZO-2                                        | A0A3B2WBH9 |
| Tkfc     | -0.0133                          | 1.05            | 0.67          | -0.90           | 0.83          | 0.23            | 0.66          | 0.15            | 0.62          | Triokinase/FMN cyclase                                             | Q8VC30     |
| Tkt      | 0.0262                           | -0.35           | <u>0.0001</u> | -0.07           | 0.54          | -0.52           | <u>0.0003</u> | -0.42           | <u>0.0001</u> | Transketolase                                                      | P40142     |
| Tln1     | -0.0420                          | 0.32            | 0.2           | -0.34           | 0.28          | 0.15            | 0.96          | -0.02           | 0.62          | Talin-1                                                            | P26039     |
| Tln2     | 0.0055                           | 0.18            | 0.092         | 0.17            | 0.67          | 0.11            | 0.55          | 0.36            | 0.22          | Talin-2                                                            | A0A1L1SQ51 |
| Tmcc1    | -0.2984                          | 0.86            | 0.24          | -0.93           | 0.25          | 0.70            | 0.19          | -0.07           | 0.93          | Transmembrane and coiled-coil domains protein 1 (Fragment)         | F8WJ98     |
| Tmed10   | -0.0021                          | 0.27            | 0.34          | -0.09           | 0.65          | 0.21            | 0.28          | 0.18            | 0.65          | Transmembrane emp24 domain-containing protein 10                   | Q9D1D4     |
| Tmem11   | -1.6412                          | 2.01            | <u>0.0130</u> | -0.74           | 0.26          | 1.99            | 0.08          | 1.27            | 0.23          | Transmembrane protein 11, mitochondrial                            | Q8BK08     |
| Tmem121b | -0.0085                          | 0.87            | 0.71          | -0.72           | 0.81          | 1.78            | 0.24          | 0.15            | 0.64          | Transmembrane protein 121B                                         | Q99MX7     |
| Tmem126a | 0.0002                           | -0.37           | 0.38          | -0.03           | 0.91          | 0.20            | 1             | -0.40           | 0.56          | Transmembrane protein 126A                                         | Q9D8Y1     |
| Tmem132a | 0.0000                           | -0.01           | 1             | -0.03           | 0.65          | -0.03           | 0.92          | -0.04           | 0.83          | Transmembrane protein 132A                                         | D3Z4S6     |
| Tmem132b | -0.0001                          | 0.75            | 0.49          | -0.03           | 0.96          | 1.46            | 0.13          | 0.73            | 0.5           | Transmembrane protein 132B                                         | F7BAB2     |
| Tmem214  | 0.4878                           | 1.49            | 0.3           | 0.76            | 0.15          | -0.08           | 0.86          | 2.25            | <u>0.0050</u> | Transmembrane protein 214                                          | D3Z6S1     |
| Tmem263  | -0.2053                          | 0.58            | 0.2           | -0.68           | 0.18          | -0.39           | 0.76          | -0.10           | 0.77          | Transmembrane protein 263                                          | Q9DAM7     |
| Tmem65   | -0.0001                          | 0.19            | 0.99          | -0.43           | 0.6           | -0.53           | 0.23          | -0.24           | 0.4           | Transmembrane protein 65                                           | Q4VAE3     |
| Tmem94   | -0.0029                          | 0.39            | <u>0.0180</u> | -0.05           | 0.82          | 0.10            | 0.44          | 0.34            | <u>0.0230</u> | Transmembrane protein 94                                           | A0A668KL57 |
| Tmod1    | -1.5022                          | 0.81            | 0.059         | -0.80           | <u>0.0130</u> | 1.62            | 0.062         | 0.01            | 0.75          | Tropomodulin-1                                                     | P49813     |
| Tmod2    | -0.0113                          | 0.20            | 0.52          | -0.33           | 0.25          | 1.20            | <u>0.0010</u> | -0.14           | 0.62          | Tropomodulin-2                                                     | Q9JKK7     |
| Tmod3    | -0.1002                          | 1.67            | 0.41          | -0.40           | 0.41          | 2.41            | 0.23          | 1.26            | 0.46          | Tropomodulin-3                                                     | Q9JHJ0     |
| Tmpo     | -0.0019                          | -0.10           | 0.7           | 0.27            | 0.35          | 0.25            | 0.34          | 0.18            | 0.41          | Lamina-associated polypeptide 2, isoforms beta/delta/epsilon/gamma | Q61029     |
| Tmx2     | 0.0000                           | 0.01            | 0.95          | -0.36           | 0.75          | -0.60           | 0.29          | -0.36           | 0.66          | Thioredoxin domain-containing protein 14                           | D3Z2J6     |

Table S2: Differentially expressed proteins in cerebral cortex (*continued*)

| gene     | $\pi_{TW/EW} \times \pi_{TF/TW}$ | log2FC<br>TW/EW | padj<br>TW/EW | log2FC<br>TF/TW | padj<br>TF/TW | log2FC<br>EF/EW | padj<br>EF/EW | log2FC<br>TF/EW | padj<br>TF/EW | description                                                 | accession  |
|----------|----------------------------------|-----------------|---------------|-----------------|---------------|-----------------|---------------|-----------------|---------------|-------------------------------------------------------------|------------|
| Tnc      | -0.4936                          | -0.67           | <u>0.0001</u> | 0.20            | 0.12          | -0.03           | 0.55          | -0.47           | <u>0.0001</u> | Tenascin                                                    | Q80YX1     |
| Tnik     | -2.6682                          | 0.90            | <u>0.0420</u> | -1.04           | <u>0.0085</u> | -0.42           | 0.54          | -0.14           | 0.92          | Tnik protein                                                | B2RQ80     |
| Tnks1bp1 | -0.0030                          | 0.16            | 0.52          | -0.20           | 0.47          | 0.29            | 0.68          | -0.04           | 0.96          | 182 kDa tankyrase-1-binding protein                         | P58871     |
| Tnpo1    | -0.2738                          | -0.40           | 0.061         | 0.37            | <u>0.0300</u> | 0.34            | 0.19          | -0.03           | 0.91          | Transportin-1                                               | Q8BFY9     |
| Tnr      | -0.0067                          | -0.22           | 0.68          | 0.39            | 0.34          | 0.06            | 0.77          | 0.17            | <u>0.0480</u> | Tenascin-R                                                  | Q8BYI9     |
| Tom1l2   | 0.0000                           | -0.32           | <u>0.0010</u> | 0.00            | 0.42          | 0.09            | 0.97          | -0.31           | <u>0.0040</u> | TOM1-like protein 2                                         | Q5SRX1     |
| Tomm20   | -0.2784                          | 0.66            | 0.19          | -0.61           | 0.11          | 0.44            | 0.07          | 0.05            | 0.62          | Mitochondrial import receptor subunit<br>TOM20 homolog      | A0A1D5RLZ6 |
| Tomm34   | 0.0000                           | 0.01            | 0.97          | -0.11           | 0.87          | 0.43            | <u>0.0390</u> | -0.10           | 0.84          | Mitochondrial import receptor subunit<br>TOM34              | Q9CYG7     |
| Tomm40   | -0.0323                          | 0.44            | 0.13          | -0.15           | 0.28          | 0.39            | 0.29          | 0.29            | 0.67          | Mitochondrial import receptor subunit<br>TOM40 homolog      | Q9QYA2     |
| Tomm70   | 0.0018                           | 0.44            | 0.074         | 0.09            | 0.91          | 0.46            | 0.12          | 0.54            | <u>0.0350</u> | Mitochondrial import receptor subunit<br>TOM70              | Q9CZW5     |
| Top1     | 0.0085                           | -0.36           | 0.56          | -0.92           | 0.79          | 0.52            | 0.55          | -1.27           | 0.29          | DNA topoisomerase 1                                         | Q04750     |
| Top2a    | -0.0977                          | -0.65           | 0.061         | 0.25            | 0.32          | 0.11            | 0.79          | -0.40           | 0.085         | DNA topoisomerase 2-alpha                                   | Q01320     |
| Top2b    | -1.4597                          | 3.03            | 0.88          | -7.95           | 0.081         | -3.44           | 0.57          | -4.92           | 0.34          | DNA topoisomerase 2-beta                                    | Q64511     |
| Tpd52l2  | -2.1478                          | 1.03            | 0.091         | -1.29           | <u>0.0280</u> | 0.04            | 0.68          | -0.26           | 0.48          | Tumor protein D54                                           | A2AUD5     |
| Tpgs1    | -0.1827                          | 0.57            | 0.38          | -1.38           | 0.28          | -2.26           | 0.23          | -0.81           | 0.62          | Tubulin polyglutamylase complex subunit<br>1                | A0A6Q6PKE1 |
| Tpi1     | -0.0195                          | -0.43           | 0.075         | 0.11            | 0.43          | -0.36           | <u>0.0140</u> | -0.32           | 0.05          | Triosephosphate isomerase                                   | P17751     |
| Tpm3     | -0.2908                          | 0.43            | 0.082         | -0.38           | <u>0.0230</u> | 0.82            | <u>0.0160</u> | 0.06            | 0.77          | Tropomyosin alpha-3 chain                                   | D3Z6I8     |
| Tpm4     | 0.0049                           | 0.84            | 0.21          | 0.17            | 0.89          | 0.58            | 0.6           | 1.01            | 0.2           | Tropomyosin alpha-4 chain                                   | Q6IRU2     |
| Tpp2     | -0.0865                          | -0.13           | 0.59          | 0.84            | <u>0.0003</u> | 0.18            | 0.085         | 0.72            | <u>0.0001</u> | Tripeptidyl-peptidase 2                                     | Q64514     |
| Tppp     | -0.0002                          | 0.02            | 0.52          | -0.07           | 0.3           | 0.13            | 0.72          | -0.06           | 0.77          | Tubulin polymerization-promoting protein                    | Q7TQD2     |
| Tppp3    | 0.1341                           | -0.22           | 0.57          | -0.99           | <u>0.0030</u> | -0.55           | 0.2           | -1.20           | <u>0.0010</u> | Tubulin polymerization-promoting protein<br>family member 3 | Q9CRB6     |
| Tpr      | 0.0000                           | -0.05           | 0.61          | 0.18            | 0.99          | -0.06           | 0.83          | 0.14            | 0.75          | Nucleoprotein TPR                                           | F6ZDS4     |
| Tpt1     | 0.0022                           | -0.17           | 0.47          | -0.13           | 0.5           | -0.29           | <u>0.0320</u> | -0.31           | 0.059         | Translationally-controlled tumor protein                    | D3YU75     |
| Tra2a    | -0.0012                          | 0.39            | 0.84          | -0.44           | 0.81          | -0.72           | 0.2           | -0.05           | 0.96          | Transformer-2 protein homolog alpha                         | A0A0N4SVC2 |
| Traf3    | -66.0288                         | 5.35            | <u>0.0250</u> | -5.20           | <u>0.0330</u> | 0.59            | 0.42          | 0.15            | 0.47          | TNF receptor-associated factor                              | Q3UHH1     |
| Trap1    | -0.3962                          | 0.35            | 0.35          | -0.92           | <u>0.0020</u> | -0.64           | 0.14          | -0.58           | 0.17          | Heat shock protein 75 kDa, mitochondrial                    | Q9CQN1     |
| Trappc1  | -0.0007                          | -0.06           | 0.85          | 0.33            | 0.34          | 0.20            | 0.26          | 0.26            | 0.27          | Trafficking protein particle complex<br>subunit             | B1ASW5     |
| Trappc10 | -2.1037                          | 2.47            | 0.35          | -2.59           | 0.19          | -2.16           | 0.57          | -0.12           | 0.86          | Trafficking protein particle complex<br>subunit 10          | Q3TLI0     |
| Trappc11 | 0.0015                           | 0.13            | 0.82          | 0.59            | 0.6           | 0.24            | 0.74          | 0.73            | 0.21          | Trafficking protein particle complex<br>subunit 11          | B2RXC1     |

Table S2: Differentially expressed proteins in cerebral cortex (*continued*)

| gene     | $\pi_{TW/EW} \times \pi_{TF/TW}$ | log2FC<br>TW/EW | padj<br>TW/EW | log2FC<br>TF/TW | padj<br>TF/TW | log2FC<br>EF/EW | padj<br>EF/EW | log2FC<br>TF/EW | padj<br>TF/EW | description                                                      | accession  |
|----------|----------------------------------|-----------------|---------------|-----------------|---------------|-----------------|---------------|-----------------|---------------|------------------------------------------------------------------|------------|
| Trappc14 | -0.1280                          | 0.69            | 0.12          | -0.43           | 0.34          | 0.15            | 0.37          | 0.27            | 0.2           | Trafficking protein particle complex subunit 14                  | A0A0G2JDC3 |
| Trappc3  | 0.1304                           | 0.24            | 0.25          | 0.47            | <u>0.0120</u> | 0.40            | <u>0.0300</u> | 0.72            | <u>0.0040</u> | Trafficking protein particle complex subunit 3                   | O55013     |
| Trappc4  | -0.0430                          | -0.21           | 0.51          | 0.66            | 0.087         | 0.12            | 0.57          | 0.45            | <u>0.0280</u> | Trafficking protein particle complex subunit 4                   | Q9ES56     |
| Trappc5  | -0.0381                          | 0.45            | 0.58          | -0.48           | 0.18          | 0.50            | 0.5           | -0.03           | 0.51          | Trafficking protein particle complex subunit 5                   | Q9CQA1     |
| Trappc6b | -0.0244                          | -0.29           | 0.23          | 0.68            | 0.64          | 0.38            | 0.12          | 0.39            | 0.96          | Trafficking protein particle complex subunit 6B                  | Q9D289     |
| Trappc9  | -0.0314                          | 0.92            | 0.3           | -0.39           | 0.68          | 1.08            | 0.18          | 0.53            | 0.66          | Trafficking protein particle complex subunit 9                   | Q3U0M1     |
| Trim2    | 0.0002                           | -0.01           | 0.46          | -0.10           | 0.34          | -0.12           | 0.12          | -0.12           | 0.058         | Tripartite motif-containing protein 2                            | E9QKC6     |
| Trim28   | -0.4096                          | 0.34            | 0.22          | -1.05           | <u>0.0180</u> | -0.64           | <u>0.0080</u> | -0.71           | <u>0.0260</u> | Transcription intermediary factor 1-beta                         | Q62318     |
| Trim3    | -11.5676                         | 1.03            | <u>0.0007</u> | -1.15           | <u>0.0008</u> | -0.29           | 0.6           | -0.12           | 0.71          | Tripartite motif-containing protein 3                            | Q3TDT0     |
| Trim46   | -15.9138                         | 1.80            | <u>0.0110</u> | -2.35           | <u>0.0120</u> | -0.02           | 0.91          | -0.55           | 0.73          | Tripartite motif-containing protein 46                           | D3YXA6     |
| Trim9    | -0.1471                          | 0.87            | 0.31          | -0.77           | 0.37          | 0.06            | 0.71          | 0.10            | 0.87          | E3 ubiquitin-protein ligase TRIM9                                | A0A6I8MWZ7 |
| Trp53bp1 | 0.0015                           | 0.09            | 0.82          | 0.41            | 0.34          | 0.28            | 0.79          | 0.50            | 0.28          | Transformation-related protein 53-binding protein 1              | A0A5H1ZRL7 |
| Trp53i11 | 0.0009                           | 0.41            | 0.27          | 0.08            | 0.89          | -0.15           | 0.68          | 0.48            | 0.19          | Tumor protein p53-inducible protein 11 (Fragment)                | A2AGS6     |
| Trpv2    | -0.0573                          | -0.33           | 0.25          | 0.40            | 0.19          | 0.35            | 0.058         | 0.06            | 0.83          | Transient receptor potential cation channel subfamily V member 2 | Q9WTR1     |
| Tsc2     | 0.0000                           | 0.01            | 0.96          | 0.08            | 0.8           | 0.43            | 0.42          | 0.09            | 0.81          | Tuberin                                                          | A0A2I3BPP1 |
| Tsc22d4  | -0.0972                          | 0.35            | 0.6           | -1.36           | 0.12          | 0.49            | 0.62          | -1.01           | 0.46          | TSC22 domain family protein 4                                    | D3YZZ4     |
| Tsn      | -0.0939                          | -0.36           | 0.13          | 0.37            | 0.16          | 0.41            | <u>0.0290</u> | 0.01            | 0.94          | Translin                                                         | Q62348     |
| Tst      | 0.0000                           | -0.07           | 0.81          | 0.01            | 0.88          | -0.25           | 0.23          | -0.06           | 0.83          | Thiosulfate sulfurtransferase                                    | P52196     |
| Ttc37    | 0.0000                           | -0.10           | 0.93          | 0.30            | 1             | -0.31           | 0.37          | 0.20            | 0.58          | Tetratricopeptide repeat domain 37                               | F8VPK0     |
| Ttc7b    | -0.0140                          | 0.24            | 0.11          | -0.09           | 0.21          | 0.19            | 0.41          | 0.16            | 0.75          | Tetratricopeptide repeat protein 7B                              | A0A1Y7VL44 |
| Ttc9b    | -0.0068                          | -0.20           | 0.53          | 0.40            | 0.49          | -0.11           | 0.62          | 0.20            | 0.9           | Tetratricopeptide repeat protein 9B                              | Q9D6E4     |
| Ttyh1    | 0.0302                           | -0.31           | 0.5           | -0.77           | 0.38          | -0.47           | 0.5           | -1.07           | 0.23          | Protein tweety homolog                                           | A0A0U1RP08 |
| Ttyh3    | -0.0188                          | -0.22           | 0.081         | 0.13            | 0.25          | 0.02            | 1             | -0.08           | 0.54          | Protein tweety homolog 3                                         | Q6P5F7     |
| Tuba1b   | -4.9471                          | 0.77            | <u>0.0020</u> | -0.77           | <u>0.0008</u> | 0.04            | 0.45          | 0.00            | 0.97          | Tubulin alpha-1B chain                                           | P05213     |
| Tubb4b   | -0.5788                          | 0.47            | <u>0.0340</u> | -0.54           | <u>0.0280</u> | -0.23           | 0.45          | -0.07           | 0.88          | Tubulin beta-4B chain                                            | P68372     |
| Tubg2    | 0.0069                           | 0.30            | 0.29          | 0.11            | 0.41          | 0.21            | 0.43          | 0.42            | 0.073         | Tubulin gamma-2 chain                                            | Q8VCK3     |
| Tubgcp2  | 0.0044                           | -0.40           | 0.7           | -0.93           | 0.84          | -1.25           | 0.58          | -1.33           | 0.52          | Gamma-tubulin complex component 2                                | Q921G8     |
| Tubgcp3  | -1.1919                          | 7.07            | 0.27          | -3.44           | 0.82          | 0.40            | 0.66          | 3.64            | 0.39          | Gamma-tubulin complex component 3                                | P58854     |
| Tufm     | -2.3371                          | 0.73            | <u>0.0010</u> | -0.62           | <u>0.0190</u> | 0.00            | 0.72          | 0.11            | 0.69          | Elongation factor Tu, mitochondrial                              | Q8BFR5     |
| Twf1     | 0.0000                           | -0.26           | 1             | -0.39           | 0.084         | -0.11           | 0.78          | -0.65           | 0.5           | Twinfilin-1                                                      | Q91YR1     |

Table S2: Differentially expressed proteins in cerebral cortex (*continued*)

| gene      | $\pi_{TW/EW} \times \pi_{TF/TW}$ | log2FC<br>TW/EW | padj<br>TW/EW | log2FC<br>TF/TW | padj<br>TF/TW | log2FC<br>EF/EW | padj<br>EF/EW | log2FC<br>TF/EW | padj<br>TF/EW | description                                                         | accession  |
|-----------|----------------------------------|-----------------|---------------|-----------------|---------------|-----------------|---------------|-----------------|---------------|---------------------------------------------------------------------|------------|
| Twf2      | -3.1203                          | 0.44            | <u>0.0130</u> | -0.94           | <u>0.0001</u> | 0.25            | 0.22          | -0.50           | 0.062         | Twinfilin-2                                                         | Q9Z0P5     |
| Txndc12   | 0.0000                           | 0.08            | 0.36          | -0.02           | 0.91          | -0.48           | 0.093         | 0.06            | 0.5           | Thioredoxin domain-containing protein 12                            | Q9CQU0     |
| Txn1l     | -0.4378                          | -0.39           | <u>0.0190</u> | 0.42            | <u>0.0280</u> | -0.05           | 0.58          | 0.03            | 0.72          | Thioredoxin-like protein 1                                          | A0A494B955 |
| Txnrd1    | -0.0043                          | -0.54           | <u>0.0230</u> | 0.05            | 0.8           | -0.75           | 0.05          | -0.49           | 0.089         | Thioredoxin reductase 1, cytoplasmic                                | Q9JMH6     |
| Txnrd2    | 0.0000                           | 0.00            | 0.99          | 0.16            | 0.34          | 0.26            | 0.5           | 0.16            | 0.25          | Thioredoxin-disulfide reductase                                     | J3QMN4     |
| Uba1      | -0.0001                          | -0.22           | 0.58          | 0.05            | 0.89          | 0.14            | 0.92          | -0.17           | 0.31          | Ubiquitin-like modifier-activating enzyme 1                         | Q02053     |
| Uba2      | -0.4315                          | -0.55           | 0.11          | 0.59            | <u>0.0410</u> | -0.12           | 0.83          | 0.03            | 0.93          | SUMO-activating enzyme subunit 2                                    | Q9Z1F9     |
| Uba5      | 0.0013                           | -0.44           | 0.075         | -0.03           | 0.82          | -0.16           | 0.73          | -0.47           | 0.054         | Ubiquitin-like modifier-activating enzyme 5                         | Q8VE47     |
| Ubap2l    | 0.0004                           | 0.07            | 0.96          | 0.68            | 0.33          | 0.41            | 0.33          | 0.75            | 0.29          | Ubiquitin-associated protein 2-like                                 | Q80X50     |
| Ube2i     | -0.0019                          | 0.17            | 0.61          | -0.22           | 0.58          | 0.40            | 0.087         | -0.04           | 0.92          | SUMO-conjugating enzyme UBC9 (Fragment)                             | G3UYPO     |
| Ube2m     | 0.0030                           | -0.08           | 0.77          | -0.35           | 0.11          | 0.08            | 0.33          | -0.44           | 0.098         | NEDD8-conjugating enzyme Ubc12                                      | P61082     |
| Ube2n     | 0.0002                           | -0.12           | 0.81          | -0.25           | 0.83          | -0.37           | 0.31          | -0.37           | 0.68          | Ubiquitin-conjugating enzyme E2 N                                   | P61089     |
| Ube2o     | -0.0013                          | 0.12            | 0.64          | -0.16           | 0.44          | 0.01            | 0.77          | -0.04           | 0.63          | E2 ubiquitin-conjugating enzyme UBE2O                               | UBE2O      |
| Ube2v2    | 0.0919                           | -0.28           | 0.059         | -0.23           | 0.069         | -0.23           | 0.1           | -0.51           | <u>0.0003</u> | Ubiquitin-conjugating enzyme E2 variant 2                           | A6X925     |
| Ube3a     | -20.5864                         | 3.11            | 0.32          | -8.07           | <u>0.0220</u> | 0.50            | 0.88          | -4.96           | 0.098         | Ubiquitin-protein ligase E3A                                        | O08759     |
| Ubl4a     | 0.0000                           | -0.07           | 0.96          | 0.16            | 0.6           | 0.49            | <u>0.0220</u> | 0.09            | 0.53          | Ubiquitin-like protein 4A                                           | P21126     |
| Ubr4      | -0.0001                          | 0.08            | 0.78          | -0.05           | 0.51          | 0.25            | 0.97          | 0.03            | 0.76          | E3 ubiquitin-protein ligase UBR4                                    | A2AN08     |
| Ubxn6     | 0.0000                           | 0.12            | 0.58          | -0.01           | 1             | 0.18            | 0.59          | 0.11            | 0.61          | UBX domain-containing protein 6                                     | Q99PL6     |
| Uchl1     | -0.0152                          | -0.63           | <u>0.0001</u> | 0.03            | 0.63          | -0.63           | <u>0.0006</u> | -0.59           | <u>0.0020</u> | Ubiquitin carboxyl-terminal hydrolase isozyme L1                    | Q9R0P9     |
| Uchl5     | 0.0071                           | -0.09           | 0.76          | -1.10           | 0.25          | -1.95           | <u>0.0190</u> | -1.19           | <u>0.0330</u> | Ubiquitin carboxyl-terminal hydrolase isozyme L5                    | Q9WUP7     |
| Uck1      | -0.0006                          | 0.12            | 0.9           | -0.35           | 0.48          | 0.55            | 0.16          | -0.24           | 0.69          | Uridine-cytidine kinase                                             | A2AN37     |
| Ufc1      | -0.0002                          | -0.22           | 0.76          | 0.08            | 0.83          | -0.30           | 0.34          | -0.13           | 0.94          | Ubiquitin-fold modifier-conjugating enzyme 1                        | M0QWS4     |
| Ufd1      | -0.5191                          | 0.60            | 0.41          | -1.74           | 0.052         | 0.00            | 0.91          | -1.14           | 0.41          | Ubiquitin recognition factor in ER-associated degradation protein 1 | P70362     |
| Ufl1      | -0.0418                          | 3.44            | 0.53          | -3.33           | 0.97          | 3.73            | 0.4           | 0.11            | 0.65          | E3 UFM1-protein ligase 1                                            | Q8CCJ3     |
| Uggt1     | -0.0149                          | -0.17           | 0.5           | 0.39            | 0.18          | 0.07            | 0.78          | 0.22            | 0.32          | UDP-glucose:glycoprotein glucosyltransferase 1                      | Q6P5E4     |
| Ugp2      | 0.0000                           | -0.14           | 0.95          | 0.27            | 0.97          | 0.03            | 0.49          | 0.13            | 0.57          | UTP-glucose-1-phosphate uridylyltransferase                         | Q91ZJ5     |
| Uhrf1bp1l | 0.0237                           | 0.33            | 0.73          | 0.47            | 0.076         | -0.97           | 0.55          | 0.81            | 0.092         | UHRF1-binding protein 1-like                                        | A2RSJ4     |
| Unc13a    | -0.9333                          | 1.15            | 0.35          | -1.78           | 0.1           | 0.66            | 0.25          | -0.63           | 0.5           | Protein unc-13 homolog A                                            | H3BJZ7     |
| Unc5a     | -1.3892                          | 0.89            | 0.36          | -4.12           | 0.14          | -0.19           | 0.85          | -3.23           | 0.36          | Netrin receptor UNC5A                                               | Q8K1S4     |

Table S2: Differentially expressed proteins in cerebral cortex (*continued*)

| gene    | $\pi_{TW/EW} \times \pi_{TF/TW}$ | log2FC<br>TW/EW | padj<br>TW/EW | log2FC<br>TF/TW | padj<br>TF/TW | log2FC<br>EF/EW | padj<br>EF/EW | log2FC<br>TF/EW | padj<br>TF/EW | description                                                     | accession  |
|---------|----------------------------------|-----------------|---------------|-----------------|---------------|-----------------|---------------|-----------------|---------------|-----------------------------------------------------------------|------------|
| Unc5c   | 0.0001                           | -0.27           | 0.53          | -0.03           | 0.92          | -0.79           | 0.65          | -0.31           | 0.45          | Netrin receptor UNC5C                                           | O08747     |
| Upf1    | -0.0517                          | 0.56            | 0.06          | -0.33           | 0.59          | -0.04           | 0.87          | 0.24            | 0.43          | Regulator of nonsense transcripts 1                             | Q9EPU0     |
| Uqcc2   | 0.0002                           | 0.02            | 0.94          | 0.36            | 0.15          | 0.43            | 0.13          | 0.38            | 0.1           | Mitochondrial nucleoid factor 1                                 | D3Z4C9     |
| Uqcrb   | -0.0129                          | 0.10            | 0.33          | -0.26           | 0.094         | 0.27            | 0.79          | -0.16           | 0.41          | Cytochrome b-c1 complex subunit 7                               | Q9CQB4     |
| Uqcrc1  | -0.9546                          | 0.25            | <u>0.0110</u> | -0.56           | <u>0.0003</u> | 0.21            | 0.86          | -0.31           | 0.27          | Cytochrome b-c1 complex subunit 1, mitochondrial                | Q9CZ13     |
| Uqcrc2  | -3.9632                          | 0.55            | <u>0.0010</u> | -0.67           | <u>0.0003</u> | 0.28            | 0.058         | -0.13           | 0.078         | Cytochrome b-c1 complex subunit 2, mitochondrial                | Q9DB77     |
| Uqcrfs1 | -0.1324                          | 0.48            | 0.22          | -0.60           | 0.2           | 0.25            | 0.97          | -0.12           | 0.66          | Cytochrome b-c1 complex subunit Rieske, mitochondrial           | Q9CR68     |
| Uqcrq   | -0.4010                          | 0.76            | 0.5           | -1.59           | 0.079         | -0.09           | 0.65          | -0.83           | 0.096         | Cytochrome b-c1 complex subunit 8                               | Q9CQ69     |
| Uso1    | 0.0020                           | 0.03            | 0.26          | 0.29            | 0.4           | -0.11           | 0.91          | 0.33            | <u>0.0030</u> | General vesicular transport factor p115                         | Q9Z1Z0     |
| Usp10   | 0.0007                           | 0.66            | 0.32          | 0.17            | 0.97          | 0.04            | 0.86          | 0.82            | 0.28          | Ubiquitin carboxyl-terminal hydrolase 10                        | P52479     |
| Usp14   | -0.0030                          | -0.45           | <u>0.0070</u> | 0.14            | 0.95          | -0.31           | 0.19          | -0.32           | 0.19          | Ubiquitin carboxyl-terminal hydrolase                           | E9PYI8     |
| Usp15   | -0.0488                          | -0.21           | 0.44          | 0.60            | 0.082         | 0.43            | 0.15          | 0.40            | 0.19          | Ubiquitin carboxyl-terminal hydrolase 15                        | Q8R5H1     |
| Usp5    | 0.0039                           | -0.15           | 0.48          | -0.07           | 0.069         | 0.00            | 0.68          | -0.22           | 0.3           | Ubiquitin carboxyl-terminal hydrolase 5                         | P56399     |
| Usp7    | -0.0103                          | 0.40            | 0.38          | -0.23           | 0.54          | 0.19            | 0.8           | 0.17            | 0.58          | Ubiquitin carboxyl-terminal hydrolase 7                         | E9PXY8     |
| Usp8    | -0.0100                          | 1.44            | 0.21          | -0.10           | 0.79          | 0.79            | 0.52          | 1.35            | 0.24          | Ubiquitin carboxyl-terminal hydrolase 8                         | Q80U87     |
| Usp9x   | 0.0001                           | 0.49            | 0.54          | 0.04            | 0.95          | 0.58            | 0.59          | 0.53            | 0.58          | Probable ubiquitin carboxyl-terminal hydrolase FAF-X            | P70398     |
| Uvrag   | -0.0527                          | 0.36            | <u>0.0420</u> | -0.29           | 0.43          | -0.32           | 0.44          | 0.07            | 0.91          | UV radiation resistance-associated protein                      | Q8K245     |
| Vamp2   | -0.0073                          | -0.18           | 0.18          | 0.11            | 0.32          | -0.13           | 0.25          | -0.07           | 0.6           | Synaptobrevin-2                                                 | B0QZN5     |
| Vamp7   | -0.6216                          | 3.76            | 0.53          | -3.58           | 0.68          | 0.36            | 0.78          | 0.18            | 0.8           | Vesicle-associated membrane protein 7                           | P70280     |
| Vapb    | -0.0334                          | 0.44            | <u>0.0140</u> | -0.07           | 0.26          | 0.16            | 0.7           | 0.37            | 0.43          | Vesicle-associated membrane protein, associated protein B and C | Q8BH80     |
| Vars1   | 0.0000                           | 0.04            | 0.95          | 0.03            | 0.52          | 0.08            | 0.71          | 0.07            | 0.4           | Valine-tRNA ligase                                              | Q9Z1Q9     |
| Vasp    | 0.0036                           | 0.20            | 0.42          | 0.10            | 0.33          | 0.98            | <u>0.0170</u> | 0.30            | 0.33          | Vasodilator-stimulated phosphoprotein                           | P70460     |
| Vat1    | -0.0030                          | 0.06            | 0.52          | -0.23           | 0.17          | -0.51           | 0.25          | -0.17           | 0.52          | Synaptic vesicle membrane protein VAT-1 homolog                 | Q62465     |
| Vat1l   | 0.0003                           | -0.01           | 0.76          | -0.47           | 0.28          | 0.34            | 0.17          | -0.48           | 0.32          | Synaptic vesicle membrane protein VAT-1 homolog-like            | Q80TB8     |
| Vbp1    | 0.0000                           | -0.14           | 1             | 0.69            | 0.11          | -0.57           | 0.65          | 0.55            | 0.31          | Prefoldin subunit 3                                             | P61759     |
| Vcan    | -0.0129                          | 0.27            | 0.57          | -0.88           | 0.6           | -0.93           | 0.61          | -0.61           | 0.83          | Versican core protein                                           | E9PYH0     |
| Vcl     | -0.1434                          | 1.48            | 0.22          | -0.76           | 0.64          | 1.09            | 0.3           | 0.72            | 0.52          | Vinculin                                                        | Q64727     |
| Vcp     | -0.0172                          | -0.21           | 0.75          | 0.49            | <u>0.0460</u> | 0.26            | 0.7           | 0.29            | 0.085         | Transitional endoplasmic reticulum ATPase                       | Q01853     |
| Vcpip1  | -0.0019                          | 0.02            | 0.62          | -0.83           | 0.28          | -0.69           | 0.075         | -0.80           | 0.075         | Ubiquitinyl hydrolase 1                                         | A0A0R4J0M9 |
| Vdac1   | 0.0002                           | 0.01            | 0.13          | 0.18            | 0.71          | 0.00            | 0.31          | 0.20            | 0.085         | Voltage-dependent anion-selective channel protein 1             | Q60932     |

Table S2: Differentially expressed proteins in cerebral cortex (*continued*)

| gene   | $\pi_{TW/EW} \times \pi_{TF/TW}$ | log2FC<br>TW/EW | padj<br>TW/EW | log2FC<br>TF/TW | padj<br>TF/TW | log2FC<br>EF/EW | padj<br>EF/EW | log2FC<br>TF/EW | padj<br>TF/EW | description                                            | accession |
|--------|----------------------------------|-----------------|---------------|-----------------|---------------|-----------------|---------------|-----------------|---------------|--------------------------------------------------------|-----------|
| Vdac2  | 0.0005                           | 0.11            | 0.12          | 0.15            | 0.93          | -0.01           | 0.21          | 0.26            | 0.17          | Outer mitochondrial membrane protein porin 2           | G3UX26    |
| Vdac3  | 0.0011                           | 0.08            | 0.35          | 0.21            | 0.71          | 0.07            | 0.58          | 0.30            | 0.13          | Voltage-dependent anion-selective channel protein 3    | J3QMG3    |
| Vgf    | -0.0263                          | 0.38            | 0.28          | -0.26           | 0.33          | 0.02            | 0.36          | 0.12            | 0.99          | Neurosecretory protein VGF                             | Q0VGU4    |
| Vps11  | 0.0005                           | 0.06            | 0.61          | 0.20            | 0.66          | 0.02            | 0.65          | 0.26            | 0.42          | Vacuolar protein sorting-associated protein 11 homolog | Q91W86    |
| Vps13a | -0.4651                          | 0.39            | 0.81          | -6.37           | <u>0.0090</u> | -0.99           | 0.7           | -5.98           | <u>0.0150</u> | Vacuolar protein sorting-associated protein 13A        | Q5H8C4    |
| Vps13c | -0.0964                          | 1.16            | 0.29          | -0.72           | 0.61          | 0.05            | 0.89          | 0.44            | 0.53          | Vacuolar protein sorting-associated protein 13C        | Q8BX70    |
| Vps16  | 0.0290                           | 0.75            | <u>0.0010</u> | 0.08            | 0.69          | -0.03           | 0.78          | 0.83            | <u>0.0008</u> | Vacuolar protein sorting-associated protein 16 homolog | G3X8X7    |
| Vps18  | 0.0084                           | 0.46            | 0.32          | 0.13            | 0.52          | 0.05            | 0.68          | 0.60            | 0.077         | Vacuolar protein sorting-associated protein 18 homolog | Q8R307    |
| Vps26a | -0.2066                          | 2.44            | 0.17          | -0.53           | 0.62          | -4.13           | 0.052         | 1.91            | 0.63          | Vacuolar protein sorting-associated protein 26A        | P40336    |
| Vps26b | -0.7512                          | -0.60           | 0.35          | 2.18            | 0.055         | 0.23            | 0.65          | 1.57            | 0.22          | Vacuolar protein sorting-associated protein 26B        | Q8C0E2    |
| Vps29  | 0.5549                           | 0.32            | 0.18          | 0.64            | <u>0.0002</u> | 0.48            | 0.17          | 0.96            | <u>0.0010</u> | Vacuolar protein sorting-associated protein 29         | Q9QZ88    |
| Vps33a | 0.0001                           | 0.07            | 0.99          | 0.30            | 0.12          | 0.01            | 0.89          | 0.37            | <u>0.0080</u> | Vacuolar protein sorting-associated protein 33A        | Q9D2N9    |
| Vps33b | 0.1291                           | 0.50            | 0.059         | 0.31            | 0.21          | -0.20           | 0.71          | 0.81            | <u>0.0280</u> | Vacuolar protein sorting-associated protein 33B        | P59016    |
| Vps35  | 0.0000                           | 0.33            | 0.15          | 0.43            | 1             | -0.60           | 0.27          | 0.76            | 0.23          | Vacuolar protein sorting-associated protein 35         | Q9EQH3    |
| Vps39  | 0.0010                           | 0.20            | 0.93          | 0.23            | 0.19          | -0.75           | 0.55          | 0.43            | <u>0.0240</u> | Vam6/Vps39-like protein                                | Q8R5L3    |
| Vps41  | 0.0038                           | 0.34            | 0.51          | 0.14            | 0.53          | -0.17           | 0.87          | 0.48            | 0.14          | Vacuolar protein sorting-associated protein 41 homolog | Q5KU39    |
| Vps45  | -0.0027                          | -0.02           | 0.85          | 0.49            | <u>0.0001</u> | -0.17           | 0.31          | 0.46            | <u>0.0001</u> | Vacuolar protein sorting-associated protein 45         | P97390    |
| Vps4b  | -0.0050                          | 0.38            | 0.55          | -0.28           | 0.66          | -0.06           | 0.83          | 0.10            | 0.79          | Vacuolar protein sorting-associated protein 4B         | P46467    |
| Vps50  | 0.0048                           | 0.13            | 0.77          | 0.44            | 0.18          | -0.05           | 0.8           | 0.57            | <u>0.0280</u> | Syndetin                                               | Q8CI71    |
| Vps51  | -0.0002                          | -0.11           | 0.78          | 0.51            | 0.91          | -0.04           | 0.7           | 0.40            | 0.7           | Vacuolar protein sorting-associated protein 51 homolog | Q3UVL4    |
| Vps52  | -0.4606                          | -0.98           | <u>0.0170</u> | 0.81            | 0.47          | -0.41           | 0.58          | -0.18           | 0.88          | Vacuolar protein sorting-associated protein 52 homolog | Q8C754    |



Table S2: Differentially expressed proteins in cerebral cortex (*continued*)

| gene   | $\pi_{TW/EW} \times \pi_{TF/TW}$ | log2FC<br>TW/EW | padj<br>TW/EW | log2FC<br>TF/TW | padj<br>TF/TW | log2FC<br>EF/EW | padj<br>EF/EW | log2FC<br>TF/EW | padj<br>TF/EW | description                                                    | accession  |
|--------|----------------------------------|-----------------|---------------|-----------------|---------------|-----------------|---------------|-----------------|---------------|----------------------------------------------------------------|------------|
| Vps53  | -0.0723                          | -0.10           | 0.42          | 0.64            | <u>0.0010</u> | 0.26            | 0.056         | 0.54            | <u>0.0009</u> | Vacuolar protein sorting-associated protein 53 homolog         | Q8CCB4     |
| Vps8   | 0.0686                           | 0.87            | 0.1           | 0.38            | 0.62          | -0.08           | 0.87          | 1.25            | 0.073         | Vacuolar protein sorting-associated protein 8 homolog          | F8WI64     |
| Vps9d1 | -1.1608                          | 1.03            | 0.18          | -1.40           | 0.083         | 0.49            | 0.47          | -0.37           | 0.86          | VPS9 domain-containing protein 1                               | Q3U280     |
| Vsnl1  | -9.4887                          | 4.31            | 0.14          | -4.16           | 0.24          | 0.23            | 0.66          | 0.15            | 0.63          | Visinin-like protein 1                                         | P62761     |
| Vtilb  | 0.2627                           | 0.54            | 0.067         | 0.45            | 0.12          | 0.59            | 0.46          | 0.99            | <u>0.0010</u> | Vesicle transport through interaction with t-SNAREs homolog 1B | O88384     |
| Vwa5a  | -0.0017                          | 0.10            | 0.77          | -0.26           | 0.26          | -0.54           | 0.88          | -0.16           | 0.34          | von Willebrand factor A domain-containing protein 5A           | Q99KC8     |
| Vwa8   | -1.3202                          | 1.07            | 0.13          | -1.35           | 0.093         | 0.60            | 0.53          | -0.27           | 0.66          | von Willebrand factor A domain-containing protein 8            | Q8CC88     |
| Wars2  | -0.0094                          | -0.20           | 0.96          | 0.66            | <u>0.0001</u> | 0.06            | 0.73          | 0.46            | <u>0.0022</u> | Tryptophan-tRNA ligase, mitochondrial                          | Q9CYK1     |
| Wasf1  | -0.0077                          | 0.40            | 0.23          | -0.08           | 0.42          | -0.11           | 0.84          | 0.32            | 0.23          | Wiskott-Aldrich syndrome protein family member 1               | Q8R5H6     |
| Wasf2  | 0.0069                           | 0.19            | 0.34          | 0.20            | 0.41          | -0.08           | 0.5           | 0.39            | <u>0.0330</u> | Wiskott-Aldrich syndrome protein family member 2               | Q8BH43     |
| Wasf3  | 0.0243                           | -0.63           | 0.26          | -0.58           | 0.77          | -0.78           | 0.17          | -1.20           | 0.12          | Wiskott-Aldrich syndrome protein family member 3               | Q8VHI6     |
| Washc1 | 0.2794                           | 0.44            | 0.58          | 1.07            | <u>0.0031</u> | 0.77            | 0.21          | 1.50            | <u>0.0010</u> | WASH complex subunit 1                                         | Q8VDD8     |
| Washc4 | 0.0002                           | 0.02            | 0.85          | 0.30            | 0.32          | -0.53           | 0.3           | 0.33            | 0.28          | WASH complex subunit 4                                         | Q3UMB9     |
| Washc5 | -0.0024                          | -0.02           | 0.84          | 1.00            | <u>0.0280</u> | 0.02            | 0.91          | 0.98            | <u>0.0280</u> | WASH complex subunit 5                                         | Q8C2E7     |
| Wasl   | 0.0011                           | 0.10            | 0.19          | 0.05            | 0.48          | 0.37            | 0.36          | 0.15            | 0.4           | Neural Wiskott-Aldrich syndrome protein                        | Q91YD9     |
| Wbp11  | -0.4712                          | 1.86            | 0.2           | -1.17           | 0.49          | 0.21            | 0.97          | 0.68            | 0.76          | WW domain-binding protein 11                                   | Q923D5     |
| Wdfy3  | -2.5263                          | 1.08            | <u>0.0390</u> | -1.15           | <u>0.0360</u> | 0.13            | 0.62          | -0.07           | 0.96          | WD repeat and FYVE domain-containing protein 3                 | A0A1D5RLV7 |
| Wdr1   | -0.0343                          | 0.06            | 0.082         | -0.19           | <u>0.0017</u> | 0.19            | 0.31          | -0.14           | 0.99          | WD repeat-containing protein 1                                 | O88342     |
| Wdr13  | 0.0000                           | 0.07            | 0.85          | -0.04           | 0.77          | -0.31           | 0.43          | 0.03            | 0.88          | WD repeat-containing protein 13                                | Q91V09     |
| Wdr20  | -0.8779                          | 1.56            | 0.42          | -2.41           | 0.24          | 1.71            | 0.37          | -0.85           | 0.83          | WD repeat-containing protein 20                                | Q3UWE6     |
| Wdr26  | -0.1806                          | 1.49            | 0.67          | -1.85           | 0.42          | 1.46            | 0.44          | -0.36           | 1             | WD repeat-containing protein 26                                | A0A494BB75 |
| Wdr37  | -0.0029                          | 0.23            | 0.94          | -0.71           | 0.22          | 0.00            | 0.48          | -0.47           | 0.17          | WD repeat-containing protein 37                                | Q8CBE3     |
| Wdr47  | -0.0142                          | 1.05            | 0.67          | -0.90           | 0.82          | 0.23            | 0.67          | 0.15            | 0.64          | WD repeat-containing protein 47                                | Q8CGF6     |
| Wdr48  | -0.0001                          | 0.07            | 0.45          | -0.03           | 0.85          | 0.22            | 0.058         | 0.05            | 0.57          | WD repeat-containing protein 48                                | Q8BH57     |
| Wdr7   | 0.0023                           | 0.03            | 0.13          | 0.20            | 0.37          | -0.15           | 0.88          | 0.23            | 0.53          | WD repeat-containing protein 7                                 | Q920I9     |
| Wdr81  | -0.8401                          | 1.05            | 0.26          | -1.66           | 0.15          | 0.61            | 0.38          | -0.61           | 0.7           | WD repeat-containing protein 81 (Fragment)                     | K4DI77     |
| Wdr91  | -0.0019                          | 0.32            | 0.67          | -0.29           | 0.76          | -0.77           | 0.59          | 0.03            | 0.96          | WD repeat-containing protein 91                                | Q7TMQ7     |
| Wfs1   | 0.0025                           | -0.33           | 0.35          | -0.12           | 0.73          | 0.30            | <u>0.0280</u> | -0.46           | <u>0.0490</u> | Wolframin                                                      | Q3UN10     |

Table S2: Differentially expressed proteins in cerebral cortex (*continued*)

| gene    | $\pi_{TW/EW} \times \pi_{TF/TW}$ | log2FC<br>TW/EW | padj<br>TW/EW | log2FC<br>TF/TW | padj<br>TF/TW | log2FC<br>EF/EW | padj<br>EF/EW | log2FC<br>TF/EW | padj<br>TF/EW | description                                         | accession |
|---------|----------------------------------|-----------------|---------------|-----------------|---------------|-----------------|---------------|-----------------|---------------|-----------------------------------------------------|-----------|
| Wipf2   | 0.0000                           | -0.23           | 0.75          | 0.16            | 0.98          | -0.17           | 0.55          | -0.07           | 0.79          | WAS/WASL-interacting protein family member 2        | Q6PEV3    |
| Wipf3   | -0.0002                          | 0.18            | 0.57          | -0.06           | 0.86          | -0.27           | 0.48          | 0.12            | 0.86          | WAS/WASL-interacting protein family member 3        | D3Z5R4    |
| Wnk1    | -0.0103                          | 0.61            | 0.98          | -4.21           | 0.35          | -0.51           | 0.82          | -3.60           | 0.43          | Serine/threonine-protein kinase WNK1                | P83741    |
| Wnk2    | -0.0155                          | 0.11            | 0.83          | -1.55           | 0.075         | -0.34           | 0.68          | -1.43           | 0.069         | Serine/threonine-protein kinase WNK2                | Q3UH66    |
| Wwp1    | -0.5267                          | -0.62           | <u>0.0130</u> | 0.39            | 0.07          | 0.19            | 0.56          | -0.23           | 0.087         | NEDD4-like E3 ubiquitin-protein ligase WWP1         | Q8BZZ3    |
| Xpnpep3 | 0.0000                           | 0.14            | 0.67          | 0.25            | 1             | 0.79            | 0.078         | 0.39            | <u>0.0110</u> | Xaa-Pro aminopeptidase 3                            | B7ZMP1    |
| Xpo1    | -0.0014                          | 0.17            | 0.53          | -0.15           | 0.63          | 0.15            | 0.45          | 0.02            | 1             | Exportin-1                                          | Q6P5F9    |
| Xrn2    | -0.0783                          | 2.64            | 0.44          | -2.64           | 0.93          | -1.50           | 0.36          | 0.00            | 1             | 5'-3' exoribonuclease 2                             | Q9DBR1    |
| Yars    | -0.0011                          | 0.37            | 0.44          | -0.10           | 0.82          | -0.04           | 0.88          | 0.27            | 0.55          | Tyrosine-tRNA ligase                                | A2A7S7    |
| Yars2   | -0.2729                          | 0.57            | <u>0.0006</u> | -0.20           | 0.18          | 0.31            | 0.11          | 0.37            | <u>0.0300</u> | Tyrosine-tRNA ligase, mitochondrial                 | Q8BYL4    |
| Yme1l1  | -0.0204                          | 0.95            | 0.25          | -0.23           | 0.7           | 0.37            | 0.62          | 0.72            | 0.26          | ATP-dependent zinc metalloprotease YME1L1           | O88967    |
| Ythdf1  | 0.0154                           | 0.23            | 0.42          | 0.33            | 0.29          | 0.02            | 1             | 0.56            | 0.084         | YTH domain-containing family protein 1              | P59326    |
| Ywhab   | 0.0018                           | 0.12            | 0.16          | 0.09            | 0.61          | 0.09            | 0.63          | 0.21            | 0.4           | 14-3-3 protein beta/alpha                           | Q9CQV8    |
| Ywhae   | 0.0000                           | -0.23           | 1             | 0.09            | 0.59          | -0.04           | 0.9           | -0.14           | 0.49          | 14-3-3 protein epsilon                              | P62259    |
| Ywhag   | -0.0390                          | -0.17           | 0.55          | 0.34            | <u>0.0025</u> | -0.09           | 0.61          | 0.18            | <u>0.0410</u> | 14-3-3 protein gamma                                | P61982    |
| Ywhah   | -0.0002                          | -0.08           | 0.63          | 0.04            | 0.44          | -0.09           | 0.51          | -0.04           | 0.87          | 14-3-3 protein eta                                  | P68510    |
| Ywhaz   | 0.0000                           | -0.13           | 0.96          | 0.13            | 0.83          | 0.00            | 0.64          | 0.00            | 0.69          | 14-3-3 protein zeta/delta                           | P63101    |
| Zc2hc1a | -1.8307                          | 0.76            | <u>0.0032</u> | -0.64           | <u>0.0310</u> | 0.15            | 0.47          | 0.12            | 0.44          | Zinc finger C2HC domain-containing protein 1A       | Q8BJH1    |
| Zc3h15  | -0.1801                          | 0.65            | <u>0.0440</u> | -0.32           | 0.23          | -0.17           | 0.39          | 0.32            | <u>0.0300</u> | Zinc finger CCCH domain-containing protein 15       | Q3TIV5    |
| Zdhhc5  | 0.0010                           | -0.29           | 0.6           | -0.12           | 0.75          | -1.06           | 0.12          | -0.41           | 0.38          | Palmitoyltransferase ZDHHC5                         | Q8VDZ4    |
| Zfr     | -0.1810                          | 0.58            | 0.088         | -0.41           | 0.19          | -0.20           | 0.6           | 0.18            | 0.49          | Zinc finger RNA-binding protein                     | O88532    |
| Zmat2   | 0.0002                           | 0.07            | 0.52          | 0.08            | 0.78          | 0.19            | 0.24          | 0.15            | 0.45          | Zinc finger matrin-type protein 2                   | Q9CPW7    |
| Zfp365  | -0.0886                          | -0.66           | <u>0.0070</u> | 0.19            | 0.47          | 0.16            | 0.66          | -0.47           | <u>0.0110</u> | Protein ZNF365                                      | Q8BG89    |
| Zranb2  | 0.0006                           | 0.01            | 0.93          | 0.59            | <u>0.0010</u> | -0.41           | 0.14          | 0.60            | <u>0.0010</u> | Zinc finger Ran-binding domain-containing protein 2 | D3Z4U0    |
| Zwint   | -0.0045                          | 0.36            | 0.1           | -0.07           | 0.66          | 0.34            | <u>0.0310</u> | 0.29            | 0.072         | ZW10 interactor                                     | Q9CQU5    |

Table S3: Proteins from dendrogram cut 1

| gene    | interaction<br>p-value | trisomy<br>p-value | fluoxetine<br>p-value | TW - TF<br>p-value | TW<br>log <sub>2</sub> (quantity)<br>mean $\pm$ SE | TF<br>log <sub>2</sub> (quantity)<br>mean $\pm$ SE | EW<br>log <sub>2</sub> (quantity)<br>mean $\pm$ SE | EF<br>log <sub>2</sub> (quantity)<br>mean $\pm$ SE | UniProt<br>accession               |
|---------|------------------------|--------------------|-----------------------|--------------------|----------------------------------------------------|----------------------------------------------------|----------------------------------------------------|----------------------------------------------------|------------------------------------|
| Abcf1   | 0.0370                 | 0.6638             | 0.0442                | 0.0400             | 11.36 $\pm$ 0.33                                   | 10.17 $\pm$ 0.32                                   | 10.64 $\pm$ 0.17                                   | 10.66 $\pm$ 0.18                                   | Q6P542                             |
| Acaa2   | 0.0096                 | 0.0837             | 0.0016                | 0.0002             | 12.36 $\pm$ 0.03                                   | 11.71 $\pm$ 0.07                                   | 12.25 $\pm$ 0.06                                   | 12.16 $\pm$ 0.15                                   | Q8BWT1                             |
| Actg1   | 0.0343                 | 0.2057             | 0.7290                | 0.1099             | 12.17 $\pm$ 0.15                                   | 11.53 $\pm$ 0.31                                   | 11.84 $\pm$ 0.48                                   | 12.71 $\pm$ 0.23                                   | P63260                             |
| Adap1   | 0.0375                 | 0.1159             | 0.0295                | 0.0183             | 12.19 $\pm$ 0.17                                   | 11.45 $\pm$ 0.15                                   | 12.09 $\pm$ 0.11                                   | 12.07 $\pm$ 0.17                                   | E9PY16                             |
| Aifm3   | 0.0182                 | 0.5913             | 0.0115                | 0.0135             | 12.17 $\pm$ 0.18                                   | 11.43 $\pm$ 0.12                                   | 11.75 $\pm$ 0.08                                   | 11.72 $\pm$ 0.12                                   | Q3TY86                             |
| Ank2    | 0.0235                 | 0.9726             | 0.3229                | 0.0743             | 10.94 $\pm$ 0.53                                   | 9.62 $\pm$ 0.30                                    | 10.01 $\pm$ 0.35                                   | 10.58 $\pm$ 0.18                                   | S4R2F3                             |
| Atp5c1  | 0.0149                 | 0.1041             | 0.0058                | 0.0124             | 12.01 $\pm$ 0.39                                   | 10.51 $\pm$ 0.16                                   | 10.89 $\pm$ 0.21                                   | 10.77 $\pm$ 0.10                                   | A2AKU9                             |
| Bckdk   | 0.0150                 | 0.2180             | 0.4050                | 0.0213             | 11.59 $\pm$ 0.22                                   | 10.89 $\pm$ 0.03                                   | 11.30 $\pm$ 0.17                                   | 11.67 $\pm$ 0.25                                   | A0A0U1RNL7<br>A0A0U1RPT4<br>O55028 |
| Cadps   | 0.0124                 | 0.1774             | 0.2059                | 0.0279             | 6.86 $\pm$ 2.42                                    | -0.13 $\pm$ 0.16                                   | -0.28 $\pm$ 0.28                                   | 2.34 $\pm$ 2.17                                    | A0A286YDH6                         |
| Cc2d1a  | 0.0220                 | 0.5280             | 0.6402                | 0.0958             | 10.37 $\pm$ 0.33                                   | 9.19 $\pm$ 0.50                                    | 9.62 $\pm$ 0.46                                    | 10.43 $\pm$ 0.10                                   | Q8K1A6                             |
| Cdh6    | 0.0147                 | 0.2203             | 0.2534                | 0.0274             | 6.64 $\pm$ 2.33                                    | -0.13 $\pm$ 0.16                                   | -0.28 $\pm$ 0.28                                   | 2.47 $\pm$ 2.38                                    | P97326                             |
| Cntnap1 | 0.0325                 | 0.2353             | 0.2666                | 0.0464             | 11.04 $\pm$ 0.20                                   | 10.44 $\pm$ 0.13                                   | 10.84 $\pm$ 0.23                                   | 11.06 $\pm$ 0.07                                   | O54991                             |
| Dars2   | 0.0390                 | 0.3213             | 0.1704                | 0.6347             | 6.68 $\pm$ 2.26                                    | 4.90 $\pm$ 2.76                                    | -0.28 $\pm$ 0.28                                   | 7.56 $\pm$ 2.12                                    | Q8BIP0                             |
| Dis3l2  | 0.0242                 | 0.6867             | 0.5548                | 0.1067             | 11.96 $\pm$ 0.41                                   | 11.15 $\pm$ 0.12                                   | 11.41 $\pm$ 0.09                                   | 11.91 $\pm$ 0.26                                   | Q8CI75                             |
| Dnajc8  | 0.0093                 | 0.0003             | 0.0139                | 0.0221             | 9.36 $\pm$ 0.21                                    | 2.30 $\pm$ 2.29                                    | -0.28 $\pm$ 0.28                                   | -0.03 $\pm$ 0.45                                   | A2ALF3                             |
| Eif2s3x | 0.0031                 | 0.0149             | 0.0544                | 0.0209             | 10.68 $\pm$ 0.32                                   | 9.37 $\pm$ 0.28                                    | 9.21 $\pm$ 0.09                                    | 9.56 $\pm$ 0.13                                    | Q9Z0N1                             |
| Epb41l3 | 0.0180                 | 0.3120             | 0.0809                | 0.0257             | 7.83 $\pm$ 2.23                                    | 1.20 $\pm$ 0.24                                    | 5.43 $\pm$ 1.52                                    | 6.61 $\pm$ 0.88                                    | A0A3B2WBE1                         |
| Fech    | 0.0151                 | 0.8541             | 0.2584                | 0.2074             | 11.51 $\pm$ 0.20                                   | 11.17 $\pm$ 0.13                                   | 10.97 $\pm$ 0.30                                   | 11.79 $\pm$ 0.15                                   | A0A494BAI5<br>Q544X6               |
| Flii    | 0.0444                 | 0.7729             | 0.3638                | 0.3428             | 10.33 $\pm$ 0.62                                   | 9.62 $\pm$ 0.31                                    | 8.94 $\pm$ 0.82                                    | 10.68 $\pm$ 0.21                                   | Q9JJ28                             |
| Golga3  | 0.0263                 | 0.7855             | 0.9985                | 0.1678             | 11.41 $\pm$ 0.16                                   | 11.07 $\pm$ 0.14                                   | 11.11 $\pm$ 0.10                                   | 11.44 $\pm$ 0.12                                   | A0A0R4J1H6<br>E9QP99 P55937        |
| Lrrc73  | 0.0334                 | 0.1811             | 0.0097                | 0.0230             | 11.91 $\pm$ 0.39                                   | 10.51 $\pm$ 0.24                                   | 11.65 $\pm$ 0.03                                   | 11.48 $\pm$ 0.22                                   | B2RWC4                             |
| Map4k5  | 0.0372                 | 0.9988             | 0.3190                | 0.0270             | 7.11 $\pm$ 2.48                                    | -0.13 $\pm$ 0.16                                   | 2.10 $\pm$ 2.22                                    | 4.88 $\pm$ 2.68                                    | E9Q1T3                             |
| Mink1   | 0.0278                 | 0.1598             | 0.2484                | 0.1000             | 11.49 $\pm$ 0.53                                   | 10.41 $\pm$ 0.18                                   | 10.32 $\pm$ 0.12                                   | 10.70 $\pm$ 0.12                                   | G3X9G2<br>Q9JM52                   |
| Mlf2    | 0.0228                 | 0.1289             | 0.0814                | 0.0467             | 11.54 $\pm$ 0.48                                   | 10.18 $\pm$ 0.25                                   | 11.25 $\pm$ 0.18                                   | 11.46 $\pm$ 0.19                                   | Q99KX1                             |
| Mthfd1l | 0.0257                 | 0.0147             | 0.1623                | 0.0793             | 11.24 $\pm$ 0.18                                   | 10.11 $\pm$ 0.50                                   | 11.33 $\pm$ 0.12                                   | 11.62 $\pm$ 0.11                                   | Q3V3R1                             |
| Mtpap   | 0.0062                 | 0.9423             | 0.7115                | 0.0391             | 10.02 $\pm$ 0.35                                   | 8.90 $\pm$ 0.25                                    | 9.00 $\pm$ 0.38                                    | 9.89 $\pm$ 0.21                                    | Q9D0D3                             |
| Myo1b   | 0.0469                 | 0.0885             | 0.3921                | 0.0778             | 10.24 $\pm$ 0.13                                   | 9.52 $\pm$ 0.31                                    | 10.16 $\pm$ 0.08                                   | 10.47 $\pm$ 0.31                                   | Q7TQD7                             |
| Myo1d   | 0.0150                 | 0.1431             | 0.3201                | 0.0512             | 11.09 $\pm$ 0.59                                   | 9.52 $\pm$ 0.26                                    | 10.57 $\pm$ 0.44                                   | 11.30 $\pm$ 0.20                                   | Q5SYD0                             |
| Myo5a   | 0.0420                 | 0.9763             | 0.2288                | 0.0614             | 12.16 $\pm$ 0.68                                   | 10.48 $\pm$ 0.28                                   | 11.06 $\pm$ 0.51                                   | 11.54 $\pm$ 0.32                                   | Q99104                             |
| Ncstn   | 0.0109                 | 0.6160             | 0.4305                | 0.2484             | 6.81 $\pm$ 2.38                                    | 2.40 $\pm$ 2.50                                    | -0.28 $\pm$ 0.28                                   | 7.42 $\pm$ 2.06                                    | P57716                             |
| Ndufa4  | 0.0423                 | 0.6417             | 0.6545                | 0.1513             | 12.10 $\pm$ 0.28                                   | 11.60 $\pm$ 0.13                                   | 11.60 $\pm$ 0.17                                   | 11.93 $\pm$ 0.12                                   | Q62425                             |
| Nbl     | 0.0107                 | 0.6920             | 0.0075                | 0.0067             | 11.82 $\pm$ 0.18                                   | 10.96 $\pm$ 0.12                                   | 11.34 $\pm$ 0.14                                   | 11.32 $\pm$ 0.11                                   | Q9DC07                             |

Table S3: Proteins from dendrogram cut 1 (*continued*)

| gene     | interaction<br>p-value | trisomy<br>p-value | fluoxetine<br>p-value | TW - TF<br>p-value | TW<br>log <sub>2</sub> (quantity)<br>mean $\pm$ SE | TF<br>log <sub>2</sub> (quantity)<br>mean $\pm$ SE | EW<br>log <sub>2</sub> (quantity)<br>mean $\pm$ SE | EF<br>log <sub>2</sub> (quantity)<br>mean $\pm$ SE | UniProt<br>accession |
|----------|------------------------|--------------------|-----------------------|--------------------|----------------------------------------------------|----------------------------------------------------|----------------------------------------------------|----------------------------------------------------|----------------------|
| Nudt16   | 0.0482                 | 0.0682             | 0.2180                | 0.0188             | 8.69 $\pm$ 0.16                                    | 7.85 $\pm$ 0.21                                    | 8.64 $\pm$ 0.36                                    | 8.86 $\pm$ 0.19                                    | A0A087WRE5           |
| Olfm3    | 0.0292                 | 0.9479             | 0.6129                | 0.0971             | 10.71 $\pm$ 0.29                                   | 9.89 $\pm$ 0.30                                    | 10.05 $\pm$ 0.18                                   | 10.58 $\pm$ 0.30                                   | Q6P3D0               |
| Plec     | 0.0330                 | 0.9447             | 0.2876                | 0.0865             | 11.55 $\pm$ 0.81                                   | 9.75 $\pm$ 0.34                                    | 10.28 $\pm$ 0.51                                   | 10.95 $\pm$ 0.12                                   | P63056               |
| Ppm1h    | 0.0365                 | 0.4025             | 0.9077                | 0.1361             | 13.30 $\pm$ 0.16                                   | 13.01 $\pm$ 0.06                                   | 13.11 $\pm$ 0.18                                   | 13.43 $\pm$ 0.08                                   | E9Q3W4               |
| Prkacb   | 0.0445                 | 0.0084             | 0.3131                | 0.3826             | 11.53 $\pm$ 0.09                                   | 11.37 $\pm$ 0.14                                   | 11.66 $\pm$ 0.07                                   | 12.10 $\pm$ 0.20                                   | Q3UYC0               |
| Prrc2c   | 0.0179                 | 0.6073             | 0.3257                | 0.2475             | 10.61 $\pm$ 0.31                                   | 10.05 $\pm$ 0.32                                   | 9.53 $\pm$ 0.48                                    | 10.77 $\pm$ 0.10                                   | P68181               |
| Prrt2    | 0.0116                 | 0.1438             | 0.0025                | 0.2896             | 12.70 $\pm$ 0.18                                   | 12.91 $\pm$ 0.05                                   | 11.52 $\pm$ 0.47                                   | 13.28 $\pm$ 0.11                                   | A0A0A0MQ79           |
| Prrt3    | 0.0225                 | 0.4973             | 0.2796                | 0.3804             | 4.38 $\pm$ 1.70                                    | 2.32 $\pm$ 1.35                                    | -0.23 $\pm$ 0.28                                   | 4.98 $\pm$ 1.70                                    | S4R2J9               |
| Psmc3    | 0.0065                 | 0.7992             | 0.0869                | 0.0094             | 11.66 $\pm$ 0.10                                   | 10.64 $\pm$ 0.25                                   | 11.06 $\pm$ 0.23                                   | 11.34 $\pm$ 0.18                                   | E9PUL5               |
| Ralgapa1 | 0.0341                 | 0.0214             | 0.0166                | 0.7457             | 11.91 $\pm$ 0.28                                   | 12.01 $\pm$ 0.06                                   | 11.97 $\pm$ 0.14                                   | 13.25 $\pm$ 0.38                                   | A0A0N4SVB5           |
| Sbf2     | 0.0136                 | 0.0182             | 0.0022                | 0.0106             | 5.02 $\pm$ 1.76                                    | -1.63 $\pm$ 0.45                                   | -0.51 $\pm$ 0.42                                   | -1.48 $\pm$ 0.63                                   | Q6PE13               |
| Sfxn3    | 0.0207                 | 0.5806             | 0.0477                | 0.0322             | 11.23 $\pm$ 0.42                                   | 9.89 $\pm$ 0.24                                    | 10.34 $\pm$ 0.26                                   | 10.47 $\pm$ 0.04                                   | P14685               |
| Sfxn5    | 0.0414                 | 0.6251             | 0.0793                | 0.0296             | 12.05 $\pm$ 0.21                                   | 11.38 $\pm$ 0.11                                   | 11.77 $\pm$ 0.15                                   | 11.82 $\pm$ 0.15                                   | A0A2I3BRX9           |
| Sik3     | 0.0050                 | 0.2010             | 0.1577                | 0.0457             | 11.79 $\pm$ 0.30                                   | 10.95 $\pm$ 0.14                                   | 11.43 $\pm$ 0.03                                   | 11.76 $\pm$ 0.06                                   | E9PXF8               |
| Slc12a6  | 0.0399                 | 0.3428             | 0.7834                | 0.2378             | 6.38 $\pm$ 2.14                                    | 2.28 $\pm$ 2.27                                    | -0.28 $\pm$ 0.28                                   | 4.95 $\pm$ 2.56                                    | E9Q0D4               |
| Slc25a11 | 0.0227                 | 0.7721             | 0.1887                | 0.0299             | 11.46 $\pm$ 0.34                                   | 10.45 $\pm$ 0.12                                   | 10.73 $\pm$ 0.25                                   | 11.04 $\pm$ 0.25                                   | Q91V61               |
| Slc25a22 | 0.0361                 | 0.9262             | 0.2826                | 0.0486             | 11.90 $\pm$ 0.24                                   | 11.25 $\pm$ 0.10                                   | 11.44 $\pm$ 0.23                                   | 11.67 $\pm$ 0.14                                   | Q925N0               |
| Sptan1   | 0.0331                 | 0.4210             | 0.9734                | 0.1357             | 11.61 $\pm$ 0.28                                   | 11.00 $\pm$ 0.22                                   | 11.21 $\pm$ 0.23                                   | 11.81 $\pm$ 0.27                                   | Q9D6M3               |
| Sptbn1   | 0.0372                 | 0.7803             | 0.9376                | 0.1645             | 11.56 $\pm$ 0.30                                   | 10.95 $\pm$ 0.25                                   | 11.01 $\pm$ 0.28                                   | 11.66 $\pm$ 0.26                                   | A3KGU9               |
| Sptbn2   | 0.0358                 | 0.5459             | 0.4718                | 0.1095             | 11.70 $\pm$ 0.42                                   | 10.74 $\pm$ 0.30                                   | 11.17 $\pm$ 0.28                                   | 11.67 $\pm$ 0.20                                   | Q62261               |
| Suclg1   | 0.0003                 | 0.3738             | 0.1756                | 0.0039             | 12.42 $\pm$ 0.08                                   | 11.83 $\pm$ 0.10                                   | 12.05 $\pm$ 0.06                                   | 12.37 $\pm$ 0.12                                   | Q68FG2               |
| Tbca     | 0.0095                 | 0.0945             | 0.0144                | 0.0000             | 9.10 $\pm$ 0.44                                    | -0.13 $\pm$ 0.16                                   | 7.14 $\pm$ 2.26                                    | 7.48 $\pm$ 2.08                                    | Q9WUM5               |
| Timm8b   | 0.0322                 | 0.0502             | 0.6582                | 0.2737             | 11.35 $\pm$ 0.14                                   | 11.05 $\pm$ 0.20                                   | 11.31 $\pm$ 0.06                                   | 11.74 $\pm$ 0.16                                   | P48428               |
| Tpd52l2  | 0.0137                 | 0.1220             | 0.0202                | 0.0301             | 13.91 $\pm$ 0.51                                   | 12.45 $\pm$ 0.09                                   | 12.72 $\pm$ 0.08                                   | 12.77 $\pm$ 0.05                                   | P62077               |
| Tubb2b   | 0.0181                 | 0.2137             | 0.0468                | 0.0187             | 11.14 $\pm$ 0.17                                   | 10.54 $\pm$ 0.08                                   | 10.65 $\pm$ 0.15                                   | 10.71 $\pm$ 0.02                                   | A2AUD5               |
| Ube2m    | 0.0205                 | 0.0044             | 0.1197                | 0.0161             | 11.31 $\pm$ 0.06                                   | 10.96 $\pm$ 0.09                                   | 11.38 $\pm$ 0.03                                   | 11.46 $\pm$ 0.12                                   | Q9CWF2               |
| Wdfy3    | 0.0367                 | 0.1259             | 0.0853                | 0.0210             | 13.28 $\pm$ 0.27                                   | 12.15 $\pm$ 0.25                                   | 12.21 $\pm$ 0.24                                   | 12.34 $\pm$ 0.31                                   | P61082               |
|          |                        |                    |                       |                    |                                                    |                                                    |                                                    |                                                    | A0A1D5RLV7           |
|          |                        |                    |                       |                    |                                                    |                                                    |                                                    |                                                    | G3UYW1               |
|          |                        |                    |                       |                    |                                                    |                                                    |                                                    |                                                    | Q6VNB8               |

Table S4: Proteins from dendrogram cut 2

| gene    | interaction<br>p-value | trisomy<br>p-value | fluoxetine<br>p-value | TW - TF<br>p-value | TW<br>log <sub>2</sub> (quantity)<br>mean $\pm$ SE | TF<br>log <sub>2</sub> (quantity)<br>mean $\pm$ SE | EW<br>log <sub>2</sub> (quantity)<br>mean $\pm$ SE | EF<br>log <sub>2</sub> (quantity)<br>mean $\pm$ SE | UniProt<br>accession       |
|---------|------------------------|--------------------|-----------------------|--------------------|----------------------------------------------------|----------------------------------------------------|----------------------------------------------------|----------------------------------------------------|----------------------------|
| Akr1b3  | 0.0093                 | 0.4390             | 0.2794                | 0.2834             | 12.28 $\pm$ 0.18                                   | 12.55 $\pm$ 0.14                                   | 12.81 $\pm$ 0.08                                   | 12.23 $\pm$ 0.13                                   | P45376                     |
| Ap2a1   | 0.0060                 | 0.1708             | 0.0001                | 0.0010             | 10.92 $\pm$ 0.08                                   | 11.55 $\pm$ 0.07                                   | 11.04 $\pm$ 0.08                                   | 11.23 $\pm$ 0.03                                   | P17426                     |
| Ap2a2   | 0.0478                 | 0.0100             | 0.0001                | 0.0013             | 11.03 $\pm$ 0.14                                   | 11.89 $\pm$ 0.07                                   | 10.93 $\pm$ 0.11                                   | 11.30 $\pm$ 0.12                                   | P17427                     |
| Ap2b1   | 0.0440                 | 0.5340             | 0.0045                | 0.0114             | 10.97 $\pm$ 0.24                                   | 11.87 $\pm$ 0.05                                   | 11.22 $\pm$ 0.16                                   | 11.42 $\pm$ 0.10                                   | H3BKM0<br>Q9DBG3           |
| Armc1   | 0.0468                 | 0.6161             | 0.5349                | 0.1749             | 10.61 $\pm$ 0.34                                   | 11.16 $\pm$ 0.11                                   | 11.21 $\pm$ 0.23                                   | 10.21 $\pm$ 0.55                                   | Q9D7A8                     |
| Clta    | 0.0092                 | 0.0146             | 0.0113                | 0.0002             | 12.08 $\pm$ 0.11                                   | 13.24 $\pm$ 0.09                                   | 12.13 $\pm$ 0.22                                   | 12.11 $\pm$ 0.28                                   | B1AWD8<br>B1AWD9<br>O08585 |
| Cltb    | 0.0027                 | 0.0059             | 0.0005                | 0.0003             | 12.21 $\pm$ 0.16                                   | 13.49 $\pm$ 0.06                                   | 12.28 $\pm$ 0.24                                   | 12.43 $\pm$ 0.07                                   | Q6IRU5                     |
| Cltc    | 0.0061                 | 0.0028             | 0.0055                | 0.0004             | 11.26 $\pm$ 0.16                                   | 12.52 $\pm$ 0.08                                   | 11.17 $\pm$ 0.27                                   | 11.19 $\pm$ 0.19                                   | Q68FD5                     |
| Comm2   | 0.0347                 | 0.0370             | 0.0511                | 0.0206             | 12.53 $\pm$ 0.16                                   | 13.41 $\pm$ 0.23                                   | 12.54 $\pm$ 0.16                                   | 12.50 $\pm$ 0.21                                   | Q8BXC6                     |
| Comm9   | 0.0430                 | 0.0082             | 0.0023                | 0.0082             | 11.27 $\pm$ 0.18                                   | 12.29 $\pm$ 0.19                                   | 11.12 $\pm$ 0.18                                   | 11.39 $\pm$ 0.10                                   | Q8K2Q0                     |
| Dmx12   | 0.0102                 | 0.2529             | 0.0064                | 0.0088             | 11.17 $\pm$ 0.10                                   | 11.94 $\pm$ 0.18                                   | 11.39 $\pm$ 0.13                                   | 11.42 $\pm$ 0.01                                   | B0V2P5<br>Q8BPN8           |
| Echs1   | 0.0296                 | 0.0198             | 0.0833                | 0.5588             | 12.69 $\pm$ 0.18                                   | 12.84 $\pm$ 0.16                                   | 12.64 $\pm$ 0.10                                   | 11.52 $\pm$ 0.44                                   | Q8BH95                     |
| Eif3e   | 0.0426                 | 0.5831             | 0.1786                | 0.0286             | 11.20 $\pm$ 0.12                                   | 11.85 $\pm$ 0.19                                   | 11.50 $\pm$ 0.11                                   | 11.35 $\pm$ 0.24                                   | P60229                     |
| Eif3h   | 0.0442                 | 0.3793             | 0.6343                | 0.1114             | 4.94 $\pm$ 0.33                                    | 6.81 $\pm$ 0.95                                    | 7.10 $\pm$ 0.89                                    | 5.90 $\pm$ 0.27                                    | Q91WK2                     |
| Eif3i   | 0.0493                 | 0.3484             | 0.2591                | 0.0014             | 11.87 $\pm$ 0.05                                   | 12.41 $\pm$ 0.08                                   | 12.06 $\pm$ 0.07                                   | 11.90 $\pm$ 0.30                                   | Q9QZD9                     |
| Eif3l   | 0.0038                 | 0.1941             | 0.1644                | 0.0052             | 11.32 $\pm$ 0.16                                   | 12.04 $\pm$ 0.06                                   | 11.63 $\pm$ 0.15                                   | 11.33 $\pm$ 0.18                                   | Q8QZY1                     |
| Eno1    | 0.0272                 | 0.2576             | 0.0966                | 0.6289             | 12.01 $\pm$ 0.11                                   | 12.08 $\pm$ 0.09                                   | 12.37 $\pm$ 0.06                                   | 11.95 $\pm$ 0.13                                   | P17182                     |
| Exoc1   | 0.0147                 | 0.0004             | 0.3166                | 0.0561             | 11.74 $\pm$ 0.14                                   | 12.16 $\pm$ 0.12                                   | 11.52 $\pm$ 0.09                                   | 11.32 $\pm$ 0.09                                   | Q5PPR2                     |
| Exoc3   | 0.0407                 | 0.3249             | 0.0011                | 0.0003             | 11.01 $\pm$ 0.05                                   | 11.59 $\pm$ 0.06                                   | 11.13 $\pm$ 0.13                                   | 11.30 $\pm$ 0.09                                   | Q6KAR6                     |
| Exoc8   | 0.0252                 | 0.0003             | 0.4531                | 0.0593             | 11.17 $\pm$ 0.13                                   | 11.52 $\pm$ 0.08                                   | 10.91 $\pm$ 0.12                                   | 10.72 $\pm$ 0.08                                   | Q6PGF7                     |
| Gmfb    | 0.0356                 | 0.7267             | 0.6840                | 0.1381             | 12.72 $\pm$ 0.08                                   | 12.93 $\pm$ 0.09                                   | 12.87 $\pm$ 0.06                                   | 12.72 $\pm$ 0.06                                   | Q9CQI3                     |
| Gsta4   | 0.0086                 | 0.6631             | 0.1377                | 0.1278             | 10.72 $\pm$ 0.10                                   | 11.01 $\pm$ 0.13                                   | 11.39 $\pm$ 0.06                                   | 10.51 $\pm$ 0.33                                   | P24472                     |
| Gstp1   | 0.0036                 | 0.5248             | 0.8687                | 0.0946             | 13.17 $\pm$ 0.10                                   | 13.52 $\pm$ 0.14                                   | 13.47 $\pm$ 0.10                                   | 13.08 $\pm$ 0.02                                   | P19157                     |
| Hba     | 0.0063                 | 0.6518             | 0.5808                | 0.1047             | 11.47 $\pm$ 0.20                                   | 11.87 $\pm$ 0.05                                   | 12.02 $\pm$ 0.03                                   | 11.45 $\pm$ 0.20                                   | P01942 Q91VB8              |
| Hip1    | 0.0453                 | 0.5261             | 0.0017                | 0.0072             | 11.18 $\pm$ 0.18                                   | 12.03 $\pm$ 0.11                                   | 11.39 $\pm$ 0.14                                   | 11.64 $\pm$ 0.09                                   | Q8VD75                     |
| Mapk1   | 0.0250                 | 0.0641             | 0.4963                | 0.1033             | 12.04 $\pm$ 0.07                                   | 12.45 $\pm$ 0.20                                   | 12.10 $\pm$ 0.05                                   | 11.87 $\pm$ 0.12                                   | P63085                     |
| Naxd    | 0.0232                 | 0.0048             | 0.1028                | 0.0184             | 12.22 $\pm$ 0.17                                   | 13.01 $\pm$ 0.18                                   | 12.07 $\pm$ 0.10                                   | 11.92 $\pm$ 0.25                                   | J3QMM7                     |
| Ocr1    | 0.0043                 | 0.0204             | 0.0011                | 0.0007             | 11.06 $\pm$ 0.11                                   | 12.06 $\pm$ 0.11                                   | 11.17 $\pm$ 0.13                                   | 11.27 $\pm$ 0.16                                   | Q6NVF0                     |
| Park7   | 0.0160                 | 0.2062             | 0.1912                | 0.3566             | 12.09 $\pm$ 0.12                                   | 12.24 $\pm$ 0.10                                   | 12.53 $\pm$ 0.06                                   | 12.08 $\pm$ 0.14                                   | Q99LX0                     |
| Pgm1    | 0.0482                 | 0.0918             | 0.1586                | 0.5444             | 12.10 $\pm$ 0.13                                   | 12.20 $\pm$ 0.08                                   | 12.69 $\pm$ 0.10                                   | 12.14 $\pm$ 0.23                                   | Q9D0F9                     |
| Ppp5c   | 0.0279                 | 0.1846             | 0.9665                | 0.1884             | 10.88 $\pm$ 0.18                                   | 11.34 $\pm$ 0.25                                   | 11.62 $\pm$ 0.12                                   | 11.14 $\pm$ 0.17                                   | F7BX26 Q60676              |
| Prdx6   | 0.0079                 | 0.6613             | 0.0205                | 0.7097             | 12.08 $\pm$ 0.11                                   | 12.18 $\pm$ 0.23                                   | 12.61 $\pm$ 0.10                                   | 11.47 $\pm$ 0.27                                   | D3Z0Y2 O08709              |
| Prps113 | 0.0183                 | 0.0127             | 0.3944                | 0.0909             | 12.02 $\pm$ 0.24                                   | 12.78 $\pm$ 0.29                                   | 11.94 $\pm$ 0.21                                   | 10.45 $\pm$ 0.70                                   | Q6GT24<br>G3UXL2           |

Table S4: Proteins from dendrogram cut 2 (*continued*)

| gene    | interaction<br>p-value | trisomy<br>p-value | fluoxetine<br>p-value | TW - TF<br>p-value | TW<br>log <sub>2</sub> (quantity)<br>mean $\pm$ SE | TF<br>log <sub>2</sub> (quantity)<br>mean $\pm$ SE | EW<br>log <sub>2</sub> (quantity)<br>mean $\pm$ SE | EF<br>log <sub>2</sub> (quantity)<br>mean $\pm$ SE | UniProt<br>accession                                         |
|---------|------------------------|--------------------|-----------------------|--------------------|----------------------------------------------------|----------------------------------------------------|----------------------------------------------------|----------------------------------------------------|--------------------------------------------------------------|
| Prpsap2 | 0.0203                 | 0.5645             | 0.4195                | 0.0812             | 11.59 $\pm$ 0.18                                   | 12.21 $\pm$ 0.23                                   | 11.96 $\pm$ 0.15                                   | 11.64 $\pm$ 0.12                                   | Q8R574                                                       |
| Ptms    | 0.0441                 | 0.1141             | 0.6272                | 0.0347             | 10.88 $\pm$ 0.13                                   | 11.29 $\pm$ 0.07                                   | 11.47 $\pm$ 0.09                                   | 11.21 $\pm$ 0.24                                   | Q9D0J8                                                       |
| Pycrl   | 0.0186                 | 0.0027             | 0.0504                | 0.0021             | 11.61 $\pm$ 0.14                                   | 12.35 $\pm$ 0.03                                   | 11.45 $\pm$ 0.21                                   | 11.37 $\pm$ 0.16                                   | Q9DCC4                                                       |
| Rogdi   | 0.0269                 | 0.6330             | 0.0098                | 0.0111             | 10.82 $\pm$ 0.05                                   | 11.63 $\pm$ 0.22                                   | 11.11 $\pm$ 0.15                                   | 11.19 $\pm$ 0.11                                   | Q3TDK6                                                       |
| Rps21   | 0.0493                 | 0.6809             | 0.1145                | 0.0015             | 13.55 $\pm$ 0.09                                   | 14.55 $\pm$ 0.16                                   | 14.01 $\pm$ 0.03                                   | 13.88 $\pm$ 0.48                                   | Q9CQR2                                                       |
| Rps28   | 0.0040                 | 0.8229             | 0.1137                | 0.0061             | 11.98 $\pm$ 0.14                                   | 13.12 $\pm$ 0.24                                   | 12.70 $\pm$ 0.11                                   | 12.30 $\pm$ 0.32                                   | P62858                                                       |
| Rpsa    | 0.0411                 | 0.2868             | 0.2716                | 0.0003             | 11.27 $\pm$ 0.04                                   | 12.29 $\pm$ 0.13                                   | 11.62 $\pm$ 0.04                                   | 11.28 $\pm$ 0.58                                   | P14206                                                       |
| Sacm1l  | 0.0233                 | 0.0038             | 0.7015                | 0.1415             | 11.68 $\pm$ 0.08                                   | 11.94 $\pm$ 0.13                                   | 11.56 $\pm$ 0.15                                   | 11.21 $\pm$ 0.09                                   | A0A5F8MPK9<br>Q9EP69                                         |
| Scyl2   | 0.0057                 | 0.3795             | 0.3490                | 0.0170             | 12.02 $\pm$ 0.09                                   | 12.43 $\pm$ 0.09                                   | 12.25 $\pm$ 0.09                                   | 12.02 $\pm$ 0.11                                   | G5E8J9 Q8CFE4                                                |
| Snap91  | 0.0002                 | 0.0004             | 0.0002                | 0.0005             | 11.08 $\pm$ 0.14                                   | 12.15 $\pm$ 0.08                                   | 11.12 $\pm$ 0.07                                   | 11.11 $\pm$ 0.11                                   | A0A5F8MPL3<br>E9Q9A3<br>E9QLK9<br>E9QQ05<br>Q3TWS4<br>Q61548 |
| Sumo3   | 0.0469                 | 0.0006             | 0.8844                | 0.3197             | 11.07 $\pm$ 0.20                                   | 11.30 $\pm$ 0.07                                   | 11.82 $\pm$ 0.05                                   | 11.56 $\pm$ 0.04                                   | G3UWI9<br>G3UWX9<br>G3UZ60<br>G3UZA7 P61957<br>Q9Z172        |
| Uchl1   | 0.0298                 | 0.0526             | 0.0279                | 0.9825             | 11.47 $\pm$ 0.10                                   | 11.46 $\pm$ 0.17                                   | 12.04 $\pm$ 0.08                                   | 11.42 $\pm$ 0.12                                   | Q9R0P9                                                       |
| Ywhag   | 0.0374                 | 0.2824             | 0.2158                | 0.0036             | 11.81 $\pm$ 0.07                                   | 12.16 $\pm$ 0.04                                   | 11.93 $\pm$ 0.14                                   | 11.83 $\pm$ 0.10                                   | P61982                                                       |
| Zranb2  | 0.0040                 | 0.0031             | 0.4253                | 0.0069             | 11.25 $\pm$ 0.14                                   | 11.86 $\pm$ 0.06                                   | 11.23 $\pm$ 0.13                                   | 10.85 $\pm$ 0.20                                   | D3Z4U0 Q9R020                                                |

Table S5: Selected synaptic proteins

| gene    | interaction<br>p-value | trisomy<br>p-value | fluoxetine<br>p-value | TW - TF<br>p-value | $\pi_{TW/EW} \times$<br>$\pi_{TF/TW}$ | TW<br>log <sub>2</sub> (quantity)<br>mean $\pm$ SE | TF<br>log <sub>2</sub> (quantity)<br>mean $\pm$ SE | EW<br>log <sub>2</sub> (quantity)<br>mean $\pm$ SE | EF<br>log <sub>2</sub> (quantity)<br>mean $\pm$ SE | UniProt<br>accession                     |
|---------|------------------------|--------------------|-----------------------|--------------------|---------------------------------------|----------------------------------------------------|----------------------------------------------------|----------------------------------------------------|----------------------------------------------------|------------------------------------------|
| Aak1    | 0.0348                 | 0.0370             | 0.1554                | 0.0009             | 0.0565                                | 10.36 $\pm$ 0.12                                   | 11.13 $\pm$ 0.03                                   | 10.37 $\pm$ 0.15                                   | 10.20 $\pm$ 0.34                                   | Q3UJH0                                   |
| Ap2a1   | 0.0060                 | 0.1708             | 0.0001                | 0.0010             | -0.0414                               | 10.92 $\pm$ 0.08                                   | 11.55 $\pm$ 0.07                                   | 11.04 $\pm$ 0.08                                   | 11.23 $\pm$ 0.03                                   | P17426                                   |
| Ap2a2   | 0.0478                 | 0.0100             | 0.0001                | 0.0013             | 0.2007                                | 11.03 $\pm$ 0.14                                   | 11.89 $\pm$ 0.07                                   | 10.93 $\pm$ 0.11                                   | 11.30 $\pm$ 0.12                                   | P17427                                   |
| Ap2b1   | 0.0440                 | 0.5340             | 0.0045                | 0.0114             | -0.1565                               | 10.97 $\pm$ 0.24                                   | 11.87 $\pm$ 0.05                                   | 11.22 $\pm$ 0.16                                   | 11.42 $\pm$ 0.10                                   | H3BKMO<br>Q9DBG3<br>Q9D7A8               |
| Armc1   | 0.0468                 | 0.6161             | 0.5349                | 0.1749             | -0.5358                               | 10.61 $\pm$ 0.34                                   | 11.16 $\pm$ 0.11                                   | 11.21 $\pm$ 0.23                                   | 10.21 $\pm$ 0.55                                   | Q88737                                   |
| Bsn     | 0.2690                 | 0.4287             | 0.0766                | 0.1384             | -40.2529                              | 12.44 $\pm$ 1.75                                   | 9.45 $\pm$ 0.11                                    | 10.53 $\pm$ 0.80                                   | 9.78 $\pm$ 0.18                                    | O88737                                   |
| Clta    | 0.0092                 | 0.0146             | 0.0113                | 0.0002             | -0.0158                               | 12.08 $\pm$ 0.11                                   | 13.24 $\pm$ 0.09                                   | 12.13 $\pm$ 0.22                                   | 12.11 $\pm$ 0.28                                   | B1AWD8<br>B1AWD9<br>O08585               |
| Cltb    | 0.0027                 | 0.0059             | 0.0005                | 0.0003             | -0.0345                               | 12.21 $\pm$ 0.16                                   | 13.49 $\pm$ 0.06                                   | 12.28 $\pm$ 0.24                                   | 12.43 $\pm$ 0.07                                   | Q6IRU5                                   |
| Cltc    | 0.0061                 | 0.0028             | 0.0055                | 0.0004             | 0.4466                                | 11.26 $\pm$ 0.16                                   | 12.52 $\pm$ 0.08                                   | 11.17 $\pm$ 0.27                                   | 11.19 $\pm$ 0.19                                   | Q68FD5                                   |
| Cntnap1 | 0.0325                 | 0.2353             | 0.2666                | 0.0464             | -0.0533                               | 11.04 $\pm$ 0.20                                   | 10.44 $\pm$ 0.13                                   | 10.84 $\pm$ 0.23                                   | 11.06 $\pm$ 0.07                                   | O54991                                   |
| Comm2   | 0.0347                 | 0.0370             | 0.0511                | 0.0206             | -0.0026                               | 12.53 $\pm$ 0.16                                   | 13.41 $\pm$ 0.23                                   | 12.54 $\pm$ 0.16                                   | 12.50 $\pm$ 0.21                                   | Q8BXC6                                   |
| Dbn1    | 0.1661                 | 0.5069             | 0.9288                | 0.2508             | -4.6948                               | 11.84 $\pm$ 0.56                                   | 10.52 $\pm$ 0.87                                   | 11.17 $\pm$ 0.85                                   | 12.34 $\pm$ 1.02                                   | A0A0R4J1E3<br>Q9QXS6<br>B0V2P5<br>Q8BPN8 |
| Dmxl2   | 0.0102                 | 0.2529             | 0.0064                | 0.0088             | -0.0749                               | 11.17 $\pm$ 0.10                                   | 11.94 $\pm$ 0.18                                   | 11.39 $\pm$ 0.13                                   | 11.42 $\pm$ 0.01                                   | Q8BH95<br>Q8R1B4                         |
| Echs1   | 0.0296                 | 0.0198             | 0.0833                | 0.5588             | 0.0000                                | 12.69 $\pm$ 0.18                                   | 12.84 $\pm$ 0.16                                   | 12.64 $\pm$ 0.10                                   | 11.52 $\pm$ 0.44                                   | P60229                                   |
| Eif3c   | 0.0327                 | 0.0386             | 0.2932                | 0.0414             | -0.0008                               | 10.31 $\pm$ 0.19                                   | 10.86 $\pm$ 0.10                                   | 10.35 $\pm$ 0.15                                   | 8.88 $\pm$ 0.80                                    | Q91WK2                                   |
| Eif3e   | 0.0426                 | 0.5831             | 0.1786                | 0.0286             | -0.2729                               | 11.20 $\pm$ 0.12                                   | 11.85 $\pm$ 0.19                                   | 11.50 $\pm$ 0.11                                   | 11.35 $\pm$ 0.24                                   | Q9QZD9                                   |
| Eif3h   | 0.0442                 | 0.3793             | 0.6343                | 0.1114             | -4.5465                               | 4.94 $\pm$ 0.33                                    | 6.81 $\pm$ 0.95                                    | 7.10 $\pm$ 0.89                                    | 5.90 $\pm$ 0.27                                    | Q8QZY1                                   |
| Eif3i   | 0.0493                 | 0.3484             | 0.2591                | 0.0014             | -0.0799                               | 11.87 $\pm$ 0.05                                   | 12.41 $\pm$ 0.08                                   | 12.06 $\pm$ 0.07                                   | 11.90 $\pm$ 0.30                                   | Q5PPR2                                   |
| Eif3l   | 0.0038                 | 0.1941             | 0.1644                | 0.0052             | -1.5462                               | 11.32 $\pm$ 0.16                                   | 12.04 $\pm$ 0.06                                   | 11.63 $\pm$ 0.15                                   | 11.33 $\pm$ 0.18                                   | Q6KAR6                                   |
| Exoc1   | 0.0147                 | 0.0004             | 0.3166                | 0.0561             | 0.1826                                | 11.74 $\pm$ 0.14                                   | 12.16 $\pm$ 0.12                                   | 11.52 $\pm$ 0.09                                   | 11.32 $\pm$ 0.09                                   | Q6PGF7                                   |
| Exoc3   | 0.0407                 | 0.3249             | 0.0011                | 0.0003             | -0.0707                               | 11.01 $\pm$ 0.05                                   | 11.59 $\pm$ 0.06                                   | 11.13 $\pm$ 0.13                                   | 11.30 $\pm$ 0.09                                   | D3Z6U8                                   |
| Exoc8   | 0.0252                 | 0.0003             | 0.4531                | 0.0593             | 0.0363                                | 11.17 $\pm$ 0.13                                   | 11.52 $\pm$ 0.08                                   | 10.91 $\pm$ 0.12                                   | 10.72 $\pm$ 0.08                                   | Q9CQI3                                   |
| Fmr1    | 0.3420                 | 0.1851             | 0.0425                | 0.0814             | -223.2321                             | 7.63 $\pm$ 2.08                                    | 1.68 $\pm$ 1.94                                    | 3.26 $\pm$ 2.22                                    | 0.92 $\pm$ 0.57                                    | P35436                                   |
| Gmfb    | 0.0356                 | 0.7267             | 0.6840                | 0.1381             | -0.0155                               | 12.72 $\pm$ 0.08                                   | 12.93 $\pm$ 0.09                                   | 12.87 $\pm$ 0.06                                   | 12.72 $\pm$ 0.06                                   | Q8VD75                                   |
| Grin2a  | 0.1391                 | 0.5906             | 0.0943                | 0.1062             | -15.5557                              | 11.21 $\pm$ 1.38                                   | 8.58 $\pm$ 0.16                                    | 9.56 $\pm$ 0.60                                    | 9.38 $\pm$ 0.34                                    | E9Q0N0 Q9Z0R4                            |
| Hip1    | 0.0453                 | 0.5261             | 0.0017                | 0.0072             | -0.0943                               | 11.18 $\pm$ 0.18                                   | 12.03 $\pm$ 0.11                                   | 11.39 $\pm$ 0.14                                   | 11.64 $\pm$ 0.09                                   | A0A1B0GSR5                               |
| Itsn1   | 0.7058                 | 0.0133             | 0.0318                | 0.0952             | 0.0006                                | 12.08 $\pm$ 0.15                                   | 12.45 $\pm$ 0.11                                   | 11.74 $\pm$ 0.08                                   | 12.02 $\pm$ 0.17                                   | Q99104                                   |
| Lmtk3   | 0.0499                 | 0.6674             | 0.2051                | 0.0583             | -3.5248                               | 10.72 $\pm$ 0.55                                   | 8.57 $\pm$ 0.74                                    | 9.66 $\pm$ 0.61                                    | 10.17 $\pm$ 0.52                                   | J3QMM7                                   |
| Myo5a   | 0.0420                 | 0.9763             | 0.2288                | 0.0614             | -18.6516                              | 12.16 $\pm$ 0.68                                   | 10.48 $\pm$ 0.28                                   | 11.06 $\pm$ 0.51                                   | 11.54 $\pm$ 0.32                                   | P08551                                   |
| Naxd    | 0.0232                 | 0.0048             | 0.1028                | 0.0184             | 0.1349                                | 12.22 $\pm$ 0.17                                   | 13.01 $\pm$ 0.18                                   | 12.07 $\pm$ 0.10                                   | 11.92 $\pm$ 0.25                                   | P97333                                   |
| Nefl    | 0.1864                 | 0.4782             | 0.1119                | 0.1316             | -47.1671                              | 9.22 $\pm$ 2.75                                    | 4.40 $\pm$ 0.23                                    | 5.92 $\pm$ 1.36                                    | 5.44 $\pm$ 0.31                                    | Q9CS84                                   |
| Nrp1    | 0.7706                 | 0.3256             | 0.4452                | 0.3784             | -0.0008                               | 10.68 $\pm$ 0.21                                   | 9.09 $\pm$ 1.66                                    | 8.74 $\pm$ 1.40                                    | 8.03 $\pm$ 1.95                                    |                                          |
| Nrxn1   | 0.8209                 | 0.1704             | 0.0442                | 0.1158             | -1.2303                               | 5.74 $\pm$ 0.39                                    | 6.81 $\pm$ 0.43                                    | 6.47 $\pm$ 0.22                                    | 7.34 $\pm$ 0.59                                    |                                          |

Table S5: Selected synaptic proteins (*continued*)

| gene   | interaction<br>p-value | trisomy<br>p-value | fluoxetine<br>p-value | TW - TF<br>p-value | $\pi_{TW/EW} \times$<br>$\pi_{TF/TW}$ | TW<br>$\log_2(\text{quantity})$<br>mean $\pm$ SE | TF<br>$\log_2(\text{quantity})$<br>mean $\pm$ SE | EW<br>$\log_2(\text{quantity})$<br>mean $\pm$ SE | EF<br>$\log_2(\text{quantity})$<br>mean $\pm$ SE | UniProt<br>accession |
|--------|------------------------|--------------------|-----------------------|--------------------|---------------------------------------|--------------------------------------------------|--------------------------------------------------|--------------------------------------------------|--------------------------------------------------|----------------------|
| Ocr1   | 0.0043                 | 0.0204             | 0.0011                | 0.0007             | -0.0420                               | 11.06 $\pm$ 0.11                                 | 12.06 $\pm$ 0.11                                 | 11.17 $\pm$ 0.13                                 | 11.27 $\pm$ 0.16                                 | Q6NVF0               |
| Park7  | 0.0160                 | 0.2062             | 0.1912                | 0.3566             | -0.2772                               | 12.09 $\pm$ 0.12                                 | 12.24 $\pm$ 0.10                                 | 12.53 $\pm$ 0.06                                 | 12.08 $\pm$ 0.14                                 | Q99LX0               |
| Pclo   | 0.2402                 | 0.5226             | 0.1009                | 0.1494             | -21.2808                              | 2.77 $\pm$ 1.44                                  | 0.39 $\pm$ 0.08                                  | 1.27 $\pm$ 0.62                                  | 0.84 $\pm$ 0.18                                  | Q9QYX7               |
| Pycr2  | 0.5462                 | 0.1177             | 0.5657                | 0.4420             | 0.0197                                | 10.94 $\pm$ 0.14                                 | 10.68 $\pm$ 0.28                                 | 11.16 $\pm$ 0.14                                 | 11.17 $\pm$ 0.25                                 | Q922Q4               |
| Rab5b  | 0.0998                 | 0.2186             | 0.0157                | 0.0076             | -4.3040                               | 11.70 $\pm$ 0.10                                 | 10.29 $\pm$ 0.34                                 | 10.76 $\pm$ 0.29                                 | 10.44 $\pm$ 0.40                                 | P61021               |
| Rps21  | 0.0493                 | 0.6809             | 0.1145                | 0.0015             | -5.6964                               | 13.55 $\pm$ 0.09                                 | 14.55 $\pm$ 0.16                                 | 14.01 $\pm$ 0.03                                 | 13.88 $\pm$ 0.48                                 | Q9CQR2               |
| Rps28  | 0.0040                 | 0.8229             | 0.1137                | 0.0061             | -2.0419                               | 11.98 $\pm$ 0.14                                 | 13.12 $\pm$ 0.24                                 | 12.70 $\pm$ 0.11                                 | 12.30 $\pm$ 0.32                                 | P62858               |
| Rpsa   | 0.0411                 | 0.2868             | 0.2716                | 0.0003             | -3.0511                               | 11.27 $\pm$ 0.04                                 | 12.29 $\pm$ 0.13                                 | 11.62 $\pm$ 0.04                                 | 11.28 $\pm$ 0.58                                 | P14206               |
| Sacm11 | 0.0233                 | 0.0038             | 0.7015                | 0.1415             | 0.0044                                | 11.68 $\pm$ 0.08                                 | 11.94 $\pm$ 0.13                                 | 11.56 $\pm$ 0.15                                 | 11.21 $\pm$ 0.09                                 | A0A5F8MPK9           |
| Scyl2  | 0.0057                 | 0.3795             | 0.3490                | 0.0170             | -0.3427                               | 12.02 $\pm$ 0.09                                 | 12.43 $\pm$ 0.09                                 | 12.25 $\pm$ 0.09                                 | 12.02 $\pm$ 0.11                                 | Q9EP69               |
| Snap91 | 0.0002                 | 0.0004             | 0.0002                | 0.0005             | -0.0297                               | 11.08 $\pm$ 0.14                                 | 12.15 $\pm$ 0.08                                 | 11.12 $\pm$ 0.07                                 | 11.11 $\pm$ 0.11                                 | G5E8J9 Q8CFE4        |
|        |                        |                    |                       |                    |                                       |                                                  |                                                  |                                                  |                                                  | A0A5F8MPL3           |
|        |                        |                    |                       |                    |                                       |                                                  |                                                  |                                                  |                                                  | E9Q9A3               |
|        |                        |                    |                       |                    |                                       |                                                  |                                                  |                                                  |                                                  | E9QLK9               |
|        |                        |                    |                       |                    |                                       |                                                  |                                                  |                                                  |                                                  | E9QQ05               |
|        |                        |                    |                       |                    |                                       |                                                  |                                                  |                                                  |                                                  | Q3TWS4               |
|        |                        |                    |                       |                    |                                       |                                                  |                                                  |                                                  |                                                  | Q61548               |
| Snx9   | 0.4009                 | 0.0411             | 0.9968                | 0.3801             | -0.9590                               | 10.11 $\pm$ 0.09                                 | 8.72 $\pm$ 1.46                                  | 5.06 $\pm$ 1.87                                  | 6.46 $\pm$ 2.14                                  | Q91VH2               |
| Syn3   | 0.1362                 | 0.3196             | 0.9931                | 0.1666             | -21.4623                              | 8.85 $\pm$ 0.20                                  | 6.17 $\pm$ 1.69                                  | 4.45 $\pm$ 2.10                                  | 7.10 $\pm$ 1.96                                  | Q8JZP2               |
| Ube3a  | 0.0608                 | 0.5047             | 0.0774                | 0.0191             | -20.5864                              | 8.36 $\pm$ 1.50                                  | 2.13 $\pm$ 1.27                                  | 6.21 $\pm$ 1.15                                  | 6.42 $\pm$ 2.14                                  | O08759               |
| Ywhag  | 0.0374                 | 0.2824             | 0.2158                | 0.0036             | -0.0390                               | 11.81 $\pm$ 0.07                                 | 12.16 $\pm$ 0.04                                 | 11.93 $\pm$ 0.14                                 | 11.83 $\pm$ 0.10                                 | P61982               |
| Zfp365 | 0.9497                 | 0.0229             | 0.4640                | 0.4272             | -0.0886                               | 13.40 $\pm$ 0.20                                 | 13.61 $\pm$ 0.14                                 | 14.09 $\pm$ 0.19                                 | 14.27 $\pm$ 0.41                                 | Q8BG89               |



Table S6: GSEA of proteins ranked by PC 3 loading

| Enriched Reactome pathway                                             | FDR-adjusted p-value | Normalized enrichment score | Number of genes |
|-----------------------------------------------------------------------|----------------------|-----------------------------|-----------------|
| Gluconeogenesis                                                       | 0.00012              | 2.19541                     | 18              |
| Antigen processing: Ubiquitination & Proteasome degradation           | 0.00112              | 1.93194                     | 56              |
| CTLA4 inhibitory signaling                                            | 0.01276              | 1.87857                     | 11              |
| TCF dependent signaling in response to WNT                            | 0.00758              | 1.85435                     | 42              |
| GPCR ligand binding                                                   | 0.01522              | 1.84806                     | 18              |
| Signaling by GPCR                                                     | 0.00299              | 1.83411                     | 72              |
| Metabolism                                                            | 0.00001              | 1.80392                     | 363             |
| EPHB-mediated forward signaling                                       | 0.04378              | 1.71313                     | 17              |
| Innate Immune System                                                  | 0.03797              | 1.43950                     | 214             |
| Transport of Mature mRNA derived from an Intron-Containing Transcript | 0.04546              | -1.78972                    | 11              |
| Membrane Trafficking                                                  | 0.00001              | -1.91791                    | 169             |
| Recycling pathway of L1                                               | 0.00299              | -2.08569                    | 23              |
| Lysosome Vesicle Biogenesis                                           | 0.00050              | -2.24093                    | 10              |
| MHC class II antigen presentation                                     | 0.00016              | -2.24586                    | 41              |
| trans-Golgi Network Vesicle Budding                                   | 0.00045              | -2.25416                    | 23              |
| Clathrin-mediated endocytosis                                         | 0.00001              | -2.29878                    | 56              |
| Translation                                                           | 0.00000              | -2.31899                    | 94              |
| mRNA Splicing                                                         | 0.00004              | -2.34428                    | 41              |
| Formation of the ternary complex, and subsequently, the 43S complex   | 0.00001              | -2.52513                    | 34              |

Table S7: Genes of enriched pathways

| Enriched Reactome pathway                                   | Genes                                                                                                                                                                                                                                                                                                                                                                                                                                                                                                      |
|-------------------------------------------------------------|------------------------------------------------------------------------------------------------------------------------------------------------------------------------------------------------------------------------------------------------------------------------------------------------------------------------------------------------------------------------------------------------------------------------------------------------------------------------------------------------------------|
| Gluconeogenesis                                             | Aldoa, Aldoc, Eno1, Eno2, Eno3, Gapdh, Got1, Got2, Gpi1, Mdh1, Mdh2, Pgam1, Pgk1, Slc25a1, Slc25a10, Slc25a11, Slc25a12, Tpi1                                                                                                                                                                                                                                                                                                                                                                              |
| Antigen processing: Ubiquitination & Proteasome degradation | Cdc23, Cul3, Cul5, Fbxl16, Fbxo2, Fbxo41, Fbxo6, Hectd3, Hecw2, Herc1, Huwe1, Itch, Lmo7, Mib2, Nedd4, Npepps, Psma1, Psma2, Psma3, Psma4, Psma5, Psma6, Psmb1, Psmb2, Psmb4, Psmb5, Psmb6, Psmc1, Psmc4, Psmc6, Psmd1, Psmd11, Psmd13, Psmd14, Psmd2, Psmd3, Psmd4, Psmd5, Psmd6, Psmd7, Psmd8, Psmd9, Rps27a, Thop1, Tpp2, Uba1, Uba5, Ube2m, Ube2n, Ube2o, Ube2v1, Ube2v2, Ube3a, Ubr4, Ufl1, Wwp1                                                                                                      |
| CTLA4 inhibitory signaling                                  | Fyn, Lyn, Ppp2ca, Ppp2cb, Ppp2r1a, Ppp2r5a, Ppp2r5b, Ppp2r5c, Ptpn11, Src, Yes1                                                                                                                                                                                                                                                                                                                                                                                                                            |
| TCF dependent signaling in response to WNT                  | Csnk1e, Ctbp1, Ctnnb1, Cul3, Gsk3b, Hecw1, Ppp2ca, Ppp2cb, Ppp2r1a, Ppp2r5a, Ppp2r5b, Ppp2r5c, Psma1, Psma2, Psma3, Psma4, Psma5, Psma6, Psmb1, Psmb2, Psmb4, Psmb5, Psmb6, Psmc1, Psmc4, Psmc6, Psmd1, Psmd11, Psmd13, Psmd14, Psmd2, Psmd3, Psmd4, Psmd5, Psmd6, Psmd7, Psmd8, Psmd9, Rps27a, Usp8, Xpo1, Ywhaz                                                                                                                                                                                          |
| GPCR ligand binding                                         | Cck, Gabbr1, Gabbr2, Gnas, Gnb5, Gng10, Gng13, Gng2, Gng5, Grm1, Grm2, Grm3, Grm5, Grm7, Nln, Plppr3, Rln3, Sst                                                                                                                                                                                                                                                                                                                                                                                            |
| Signaling by GPCR                                           | Abhd12, Abr, Adcy1, Adcy5, Adcy9, Arhgef26, Arhgef7, Calm1, Cck, Cdc42, Cdk5, Dagla, Dgkb, Dgkd, Dgki, Dgkz, Gabbr1, Gabbr2, Gna11, Gna13, Gnai1, Gnai2, Gnai3, Gnal, Gnaq, Gnas, Gnat3, Gnaz, Gnb5, Gng10, Gng13, Gng2, Gng5, Grk2, Grm1, Grm2, Grm3, Grm5, Grm7, Hras, Itpr1, Itsn1, Kras, Mapk1, Mapk3, Ngef, Nln, Pdpk1, Pik3r1, Plcb1, Plppr3, Plxnb1, Ppp1ca, Ppp1r1b, Ppp2ca, Ppp2cb, Ppp2r1a, Prex1, Prkacb, Prkar1a, Prkar2b, Prkca, Prkcg, Rgs14, Rgs17, Rgs19, Rgs7, Rhob, Rln3, Sos1, Src, Sst |

Table S7: Genes of enriched pathways (*continued*)

| Enriched Reactome pathway       | Genes                                                                                                                                                                                                                                                                                                                                                                                                                                                                                                                                                                                                                                                                                                                                                                                                                                                                                                                                                                                                                                                                                                                                                                                                                                                                                                                                                                                                                                                                                                                                                                                                                                                                                                                                                                                                                                                                                                                                                                                                                                                                                                                                                                                                                                                                                                                                                                                                                                                                                                                                                                                                                             |
|---------------------------------|-----------------------------------------------------------------------------------------------------------------------------------------------------------------------------------------------------------------------------------------------------------------------------------------------------------------------------------------------------------------------------------------------------------------------------------------------------------------------------------------------------------------------------------------------------------------------------------------------------------------------------------------------------------------------------------------------------------------------------------------------------------------------------------------------------------------------------------------------------------------------------------------------------------------------------------------------------------------------------------------------------------------------------------------------------------------------------------------------------------------------------------------------------------------------------------------------------------------------------------------------------------------------------------------------------------------------------------------------------------------------------------------------------------------------------------------------------------------------------------------------------------------------------------------------------------------------------------------------------------------------------------------------------------------------------------------------------------------------------------------------------------------------------------------------------------------------------------------------------------------------------------------------------------------------------------------------------------------------------------------------------------------------------------------------------------------------------------------------------------------------------------------------------------------------------------------------------------------------------------------------------------------------------------------------------------------------------------------------------------------------------------------------------------------------------------------------------------------------------------------------------------------------------------------------------------------------------------------------------------------------------------|
| Metabolism                      | <p>Aacs, Abcg2, Acaa2, Acaca, Acad11, Acad8, Acad9, Acadl, Acadm, Acads, Acadsb, Acan, Acat1, Acly, Aco2, Acot11, Acot13, Acot7, Acot9, Acox1, Acsbg1, Acsl6, Acss1, Adcy5, Adh5, Ado, Adss, Agk, Agl, Ahcyl, Aip, Ak1, Ak2, Ak4, Ak5, Akr1a1, Akr1b3, Akr7a5, Alb, Aldh18a1, Aldh1a1, Aldh1b1, Aldh1l1, Aldh2, Aldh3b1, Aldh6a1, Aldh7a1, Aldoa, Aldoc, Ampd2, Apoal, Apoe, Arsb, Asrgl1, Ass1, Atic, Atp5b, Atp5d, Atp5e, Atp5h, Atp5j2, Atp5k, Atp5l, Atp5o, Atp5pb, ATP8, Auh, Bcan, Bdh1, Blvrh, Bphl, Bpnt1, Cad, Calm1, Car2, Cbr1, Cbr3, Cbr4, Ckb, Ckmt1, Cmpk1, Cndp2, Coasy, COX2, Cox4i1, Cox5a, Cox6b1, Cox7a2l, Cox7c, Cpne1, Cpne6, Crat, Crym, Cs, Cspg4, Cspg5, Cyb5a, Cyb5b, Cyc1, Cycs, Cyp46a1, Dbt, Ddah1, Ddc, Decr1, Dlat, Dld, Dlst, Dmac2l, Dtymk, Echsl, Eci1, Eno1, Eno2, Eno3, Enpp6, Esyt2, Etfa, Etfb, Etfh, Fabp3, Fasn, Fdxr, Fhl1, G6pdx, Gapdh, Gart, Gcdh, Gda, Ggt7, Gk, Glo1, Glc, Glud1, Glul, Gmps, Gna11, Gnail, Gnai2, Gnaq, Gnas, Gnb5, Gng10, Gng13, Gng2, Gng5, Got1, Got2, Gpc1, Gpc4, Gpd1l, Gpd2, Gphn, Gpi1, Gpx1, Gstm5, Gstp1, Gstz1, Hacd3, Hadh, Hadha, Hadhb, Hagh, Hexa, Hexb, Hibch, Hmgcl, Hprrt, Hsd17b11, Hsd17b4, Hsd17b8, Hsp90aa1, Hsp90ab1, Idh1, Idh2, Idh3b, Idh3g, Inpp5j, Isyna1, Itpka, Itpr1, Ivd, Kcnb1, Kpnb1, Ldha, Lrp1, Lrpprc, Lum, Man2b1, Maoa, Maob, Marcks, Mccc1, Mccc2, Mdh1, Mdh2, Me1, Me2, Me3, Mecr, Mlycd, Mmaa, Mmab, Mmut, Mtarc2, Mthfd1, Mthfd1l, Mtmr12, Naxd, Ncan, Ndufa10, Ndufa12, Ndufa13, Ndufa2, Ndufa4, Ndufa5, Ndufa6, Ndufa7, Ndufa8, Ndufaf3, Ndufaf4, Ndufb10, Ndufb11, Ndufb3, Ndufb4, Ndufb8, Ndufb9, Ndufc2, Ndufs1, Ndufs3, Ndufs4, Ndufs7, Ndufs8, Ndufv2, Ndufv3, Nfs1, Nme1, Nme3, Nmral1, Nudt5, Nup93, Nup98, Oat, Ocl, Ogdh, Osbp, Osbpl8, Oxct1, Paics, Pcca, Pccb, Pcyt2, Pdha1, Pdhh, Pdhx, Pdk1, Pdk2, Pdk3, Pdxk, Pflk, Pflm, Pflp, Pgam1, Pgd, Pgl1, Pgl2, Pgl3, Pgm1, Pgm2l1, Phgdh, Pi4ka, Pik3r1, Pik3r4, Pip4k2a, Pip4k2b, Pip4k2c, Pip5k1c, Pitpnm1, Pitpnm2, Pkm, Plcb1, Plcg1, Plch2, Plpp3, Pnpla8, Ppa1, Ppip5k1, Ppt1, Prkacb, Prkar1a, Prkar2b, Prkca, Prps2, Psat1, Psma1, Psma2, Psma3, Psma4, Psma5, Psma6, Psmb1, Psmb2, Psmb4, Psmb5, Psmb6, Psmc1, Psmc4, Psmc6, Psmd1, Psmd11, Psmd13, Psmd14, Psmd2, Psmd3, Psmd4, Psmd5, Psmd6, Psmd7, Psmd8, Psmd9, Ptgds, Pycr2, Pycr1, Pygm, Rab14, Rab4a, Ran, Ranbp2, Rapgef4, Rida, Sbf1, Sco2, Scp2, Sdha, Sdhb, Shmt2, Slc25a1, Slc25a10, Slc25a11, Slc25a12, Slc25a19, Slc25a20, Slc2a1, Slc2a3, Slc3a2, Slc6a11, Sphk2, Srm, Sucla2, Suclg1, Them4, Tkfc, Tkt, Tpi1, Tpr, Tst, Txnrd1, Uck1, Ugp2, Uqcrcl1, Uqcrcl2, Uqcrf1, Uqcrq, Vdac1</p> |
| EPHB-mediated forward signaling | <p>Actg1, Actr2, Actr3, Arpc1a, Arpc2, Arpc3, Arpc4, Arpc5, Cdc42, Fyn, Grin2b, Hras, Itsn1, Lyn, Rac1, Src, Yes1</p>                                                                                                                                                                                                                                                                                                                                                                                                                                                                                                                                                                                                                                                                                                                                                                                                                                                                                                                                                                                                                                                                                                                                                                                                                                                                                                                                                                                                                                                                                                                                                                                                                                                                                                                                                                                                                                                                                                                                                                                                                                                                                                                                                                                                                                                                                                                                                                                                                                                                                                             |
| Innate Immune System            | <p>Abi1, Abi2, Acly, Actg1, Actr10, Actr1b, Actr2, Actr3, Adam10, Agl, Aldh3b1, Aldoa, Aldoc, Anpep, Ap1m1, Ap2a2, Arpc1a, Arpc2, Arpc3, Arpc4, Arpc5, Arsb, Atad3a, Atp6ap2, Atp6v0d1, Atp6v1a, Atp6v1b2, Atp6v1c1, Atp6v1d, Atp6v1e1, Atp6v1g1, Atp6v1g2, Atp6v1h, Atp8a1, Baiap2, Brk1, C1qc, Cab39, Calm1, Cand1, Cap1, Capza2, Cat, Cct2, Cct8, Cdc42, Ckap4, Clu, Commd3, Commd9, Cotl1, Cpne1, Crk, Cst3, Cttnb1, Cyfip1, Cyfip2, Cyld, Ddost, Dhx36, Dhx9, Dnajc3, Dnm1, Dnm3, Dock1, Dsp, Dync1h1, Dync1li1, Eea1, Eef1a1, Eef2, Elmo1, Elmo2, Erp44, Fga, Frmpd3, Fyn, Gdi2, Gpi1, Gsn, Gstp1, Hbb-bs, Hck, Hexb, Hmgbl1, Hras, Hsp90aa1, Hsp90ab1, Hsp90b1, Hspa1b, Hspa8, Huwe1, Idh1, Ilf2, Iqgap2, Ist1, Itch, Jup, Kpnb1, Kras, Lamtor1, Lyn, Man2b1, Map2k4, Map2k6, Mapk1, Mapk3, Mlec, Mvp, Myh9, Myo1c, Myo5a, Nck1, Nckap1, Nckipsd, Ncstn, Ndufc2, Pa2g4, Padi2, Pak2, Pak3, Pdap1, Pdpk1, Pdxk, Pflk, Pgam1, Pgm1, Pgrmc1, Pik3r1, Pik3r4, Pin1, Pkm, Plcg1, Pld3, Ppia, Ppp2ca, Ppp2cb, Ppp2r1a, Ppp3ca, Ppp3cb, Prdx6, Prkacb, Prss1, Psma1, Psma2, Psma3, Psma4, Psma5, Psma6, Psmb1, Psmb2, Psmb4, Psmb5, Psmb6, Psmc1, Psmc4, Psmc6, Psmd1, Psmd11, Psmd13, Psmd14, Psmd2, Psmd3, Psmd4, Psmd5, Psmd6, Psmd7, Psmd8, Psmd9, Ptpn11, Ptpn2, Pygb, Rab10, Rab14, Rab27a, Rab37, Rab3a, Rab4b, Rab5b, Rab5c, Rab6a, Rab7, Rac1, Rbsn, Rhog, Rps27a, Sarm1, Sdcbp, Serpina1c, Serpinb1a, Sh3glb2, Sirpa, Slc2a3, Snap25, Sos1, Src, Svip, Syng1, Tomm70a, Traf3, Tubb4b, Tubb5, Ube2m, Ube2n, Ube2v1, Ubr4, Usp14, Vat1, Vcl, Vcp, Wasf1, Wasf2, Wasf3, Yes1</p>                                                                                                                                                                                                                                                                                                                                                                                                                                                                                                                                                                                                                                                                                                                                                                                                                                                                                                                                                                                                                                           |

Table S7: Genes of enriched pathways (*continued*)

| Enriched Reactome pathway                                             | Genes                                                                                                                                                                                                                                                                                                                                                                                                                                                                                                                                                                                                                                                                                                                                                                                                                                                                                                                                                                                                                                                                                                                                                                                                                                                                                      |
|-----------------------------------------------------------------------|--------------------------------------------------------------------------------------------------------------------------------------------------------------------------------------------------------------------------------------------------------------------------------------------------------------------------------------------------------------------------------------------------------------------------------------------------------------------------------------------------------------------------------------------------------------------------------------------------------------------------------------------------------------------------------------------------------------------------------------------------------------------------------------------------------------------------------------------------------------------------------------------------------------------------------------------------------------------------------------------------------------------------------------------------------------------------------------------------------------------------------------------------------------------------------------------------------------------------------------------------------------------------------------------|
| Transport of Mature mRNA derived from an Intron-Containing Transcript | Alyref, Ddx39b, Eif4a3, Nup93, Nup98, Poldip3, Ranbp2, Sarnp, Srsf2, Srsf3, Tpr                                                                                                                                                                                                                                                                                                                                                                                                                                                                                                                                                                                                                                                                                                                                                                                                                                                                                                                                                                                                                                                                                                                                                                                                            |
| Membrane Trafficking                                                  | Aak1, Actg1, Actr10, Actr1a, Actr2, Actr3, Amph, Ank1, Ap1b1, Ap1g1, Ap1g2, Ap1m1, Ap1s1, Ap2a1, Ap2a2, Ap2m1, Ap2s1, Arcn1, Arf4, Arf5, Arfgap1, Arfgap2, Arpc1a, Arpc2, Arpc3, Arpc4, Arpc5, Bin1, Capza2, Capzb, Ccz1, Chmp2a, Chmp2b, Chmp4b, Chmp6, Cltb, Cltc, Copb2, Cope, Copg2, Cops2, Cops4, Cops7a, Cops8, Dctn1, Dctn2, Dctn3, Dctn4, Dennd1a, Dnajc6, Dnm1, Dnm3, Dync1h1, Dync1i1, Dync1i2, Dync1li1, Dync1li2, Epn2, Eps15l1, Fcho2, Gabarapl2, Gak, Galnt2, Gapvd1, Gdi1, Gdi2, Gja1, Golgb1, Gria1, Grk2, Hip1, Hip1r, Hspa8, Itsn1, Kif21a, Kif3a, Kif5b, Lman1, Madd, Map1lc3b, Mia3, Myo6, Napa, Napb, Necap1, Nsf, Ocr1, Pacsin1, Pacsin2, Pacsin3, Pafah1b1, Pafah1b3, Picalm, Pip5k1c, Preb, Pum1, Rab10, Rab13, Rab14, Rab1a, Rab27a, Rab27b, Rab33b, Rab35, Rab3a, Rab3gap2, Rab4a, Rab5b, Rab5c, Rab6a, Rab6b, Rab7, Rab8a, Rab8b, Rabgap1, Reps1, Reps2, Rps27a, Sbf1, Sbf2, Scfd1, Sec16a, Sec22b, Sec24b, Sec24c, Sec31a, Serpina1c, Sh3gl1, Sh3gl3, Sh3kbp1, Snx2, Snx5, Snx9, Spta1, Sptbn1, Sptbn2, Sptbn4, Src, Syt1, Syt11, Syt2, Tbc1d10b, Tbc1d24, Tfrc, Tjp1, Tmed10, Trappc11, Trappc3, Trappc4, Trappc5, Trappc6b, Trappc9, Trf, Tuba1b, Tuba8, Tubb1, Tubb2a, Tubb2b, Tubb3, Tubb4a, Tubb4b, Uso1, Vps45, Vps4a, Vps4b, Vps51, Vps52, Vps53, Ywhae |
| Recycling pathway of L1                                               | Actg1, Ap2a1, Ap2a2, Ap2m1, Ap2s1, Cltc, Dnm1, Dnm3, Dpysl2, Ezr, Mapk1, Msn, Numb, Rdx, Src, Tuba1b, Tuba8, Tubb1, Tubb2a, Tubb2b, Tubb3, Tubb4a, Tubb4b                                                                                                                                                                                                                                                                                                                                                                                                                                                                                                                                                                                                                                                                                                                                                                                                                                                                                                                                                                                                                                                                                                                                  |
| Lysosome Vesicle Biogenesis<br>MHC class II antigen presentation      | Ap1b1, Ap1g1, Ap1g2, Ap1m1, Ap1s1, Chmp2a, Cltb, Cltc, Dnajc6, Hspa8, Actr10, Actr1a, Actr1b, Ap1b1, Ap1g1, Ap1m1, Ap1s1, Ap2a1, Ap2a2, Ap2m1, Ap2s1, Canx, Capza2, Capzb, Cltc, Dctn1, Dctn2, Dctn3, Dctn4, Dnm1, Dnm3, Dync1h1, Dync1i1, Dync1i2, Dync1li1, Dync1li2, Kif3a, Kif5b, Rab7, Sec24b, Sec24c, Sec31a, Sptbn2, Tuba1b, Tuba8, Tubb1, Tubb2a, Tubb2b, Tubb3, Tubb4a, Tubb4b                                                                                                                                                                                                                                                                                                                                                                                                                                                                                                                                                                                                                                                                                                                                                                                                                                                                                                    |
| trans-Golgi Network Vesicle Budding                                   | Ap1b1, Ap1g1, Ap1g2, Ap1m1, Ap1s1, Chmp2a, Cltb, Cltc, Dnajc6, Gak, Golgb1, Hip1r, Hspa8, Napa, Necap1, Ocr1, Picalm, Pum1, Rab5c, Snx2, Snx5, Snx9, Tfrc                                                                                                                                                                                                                                                                                                                                                                                                                                                                                                                                                                                                                                                                                                                                                                                                                                                                                                                                                                                                                                                                                                                                  |
| Clathrin-mediated endocytosis                                         | Aak1, Actg1, Actr2, Actr3, Amph, Ap2a1, Ap2a2, Ap2m1, Ap2s1, Arfgap1, Arpc1a, Arpc2, Arpc3, Arpc4, Arpc5, Bin1, Cltb, Cltc, Cops2, Cops4, Cops7a, Cops8, Dnajc6, Dnm1, Dnm3, Epn2, Eps15l1, Fcho2, Gak, Gapvd1, Grk2, Hip1, Hip1r, Hspa8, Itsn1, Necap1, Ocr1, Pacsin1, Pacsin2, Pacsin3, Picalm, Pip5k1c, Rab5b, Rab5c, Reps1, Reps2, Rps27a, Sh3gl1, Sh3gl3, Sh3kbp1, Snx9, Syt1, Syt11, Syt2, Tfrc, Trf                                                                                                                                                                                                                                                                                                                                                                                                                                                                                                                                                                                                                                                                                                                                                                                                                                                                                 |
| Translation                                                           | Dap3, Eef1a1, Eef1b2, Eef1d, Eef1g, Eef2, Eif2s1, Eif2s2, Eif2s3x, Eif3a, Eif3b, Eif3c, Eif3d, Eif3e, Eif3f, Eif3g, Eif3h, Eif3i, Eif3l, Eif4a1, Eif4a2, Eif4b, Eif4e, Eif4g1, Eif4h, Mrpl1, Mrpl12, Mrpl19, Mrpl27, Mrpl37, Mrpl39, Mrpl45, Mrpl53, Mrps28, Mrps36, Mrrf, Pabpc1, Ppa1, Rpl11, Rpl12, Rpl13, Rpl14, Rpl15, Rpl18, Rpl18a, Rpl19, Rpl21, Rpl22, Rpl22l1, Rpl23, Rpl23a, Rpl24, Rpl26, Rpl27, Rpl27a, Rpl28, Rpl29, Rpl3, Rpl30, Rpl31, Rpl34, Rpl35, Rpl35a, Rpl37, Rpl37a, Rpl4, Rpl5, Rpl6, Rpl7, Rpl8, Rplp0, Rplp2, Rps10, Rps11, Rps13, Rps14, Rps16, Rps17, Rps19, Rps2, Rps21, Rps23, Rps25, Rps28, Rps3, Rps3a1, Rps4x, Rps5, Rps6, Rps7, Rps8, Rps9, Rpsa, Srp54a                                                                                                                                                                                                                                                                                                                                                                                                                                                                                                                                                                                                 |
| mRNA Splicing                                                         | Alyref, Bcas2, Cdc5l, Cherp, Ddx39b, Dhx15, Dhx9, Eif4a3, Hnrnpa1, Hnrnpa2b1, Hnrnpc, Hnrnpf, Hnrnph1, Hnrnph2, Hnrnpk, Hnrnpr, Hnrnpu, Hspa8, Ik, Lsm3, Lsm6, Pcbp1, Pnn, Prpf19, Prpf8, Sf3a1, Sf3a3, Sf3b2, Sf3b3, Snrnp70, Snrpa1, Snrpd1, Snrpd3, Snrpe, Snu13, Srrm2, Srsf2, Srsf3, Tcerg1, Wbp11, Zmat2                                                                                                                                                                                                                                                                                                                                                                                                                                                                                                                                                                                                                                                                                                                                                                                                                                                                                                                                                                             |
| Formation of the ternary complex, and subsequently, the 43S complex   | Eif2s1, Eif2s2, Eif2s3x, Eif3a, Eif3b, Eif3c, Eif3d, Eif3e, Eif3f, Eif3g, Eif3h, Eif3i, Eif3l, Rps10, Rps11, Rps13, Rps14, Rps16, Rps17, Rps19, Rps2, Rps21, Rps23, Rps25, Rps28, Rps3, Rps3a1, Rps4x, Rps5, Rps6, Rps7, Rps8, Rps9, Rpsa                                                                                                                                                                                                                                                                                                                                                                                                                                                                                                                                                                                                                                                                                                                                                                                                                                                                                                                                                                                                                                                  |

Table S8: GSEA enriched Reactome pathways for proteins ranked by  $\pi(\text{TF}/\text{EW})$

| Enriched pathway                                               | FDR-adjusted<br>p-value | Normalized<br>enrichment<br>score | Number of<br>genes |
|----------------------------------------------------------------|-------------------------|-----------------------------------|--------------------|
| Clathrin-mediated endocytosis                                  | 0.0002                  | 2.1691                            | 59                 |
| Golgi Associated Vesicle Biogenesis                            | 0.0019                  | 2.1157                            | 22                 |
| Signaling by NTRKs                                             | 0.0149                  | 1.9591                            | 23                 |
| Protein-protein interactions at synapses                       | 0.0031                  | -1.4830                           | 44                 |
| Unblocking of NMDA receptors, glutamate binding and activation | 0.0049                  | -1.5187                           | 15                 |

Table S9: Genes of enriched Reactome pathways for GSEA of proteins ranked by  $\pi(\text{TF}/\text{EW})$

| Enriched pathway                                               | Genes                                                                                                                                                                                                                                                                                                                                                                                                                               |
|----------------------------------------------------------------|-------------------------------------------------------------------------------------------------------------------------------------------------------------------------------------------------------------------------------------------------------------------------------------------------------------------------------------------------------------------------------------------------------------------------------------|
| Clathrin-mediated endocytosis                                  | Aak1, Actg1, Actr2, Actr3, Agfg1, Amph, Ap2a1, Ap2a2, Ap2b1, Ap2m1, Ap2s1, Arfgap1, Arpc1a, Arpc2, Arpc3, Arpc4, Arpc5, Arrb1, Cltb, Cltc, Cops2, Cops4, Cops6, Cops7a, Cops8, Dnajc6, Dnm1, Dnm3, Epn2, Eps15l1, Fcho2, Gak, Gapvd1, Grb2, Grk2, Hip1, Hip1r, Hspa8, Itsn1, Necap1, Ocrl, Pacsin1, Pacsin2, Pacsin3, Picalm, Pip5k1c, Rab5b, Repl1, Repl2, Rps27a, Sh3gl2, Sh3gl3, Sh3kbp1, Snap91, Snx9, Syt1, Syt11, Tfrc, Vamp2 |
| Golgi Associated Vesicle Biogenesis                            | Ap1g1, Ap1m1, Ap1s1, Arrb1, Cltc, Dnajc6, Gak, Golgb1, Hip1r, Hspa8, Napa, Necap1, Ocrl, Picalm, Pum1, Sh3d19, Sh3gl2, Snx2, Snx5, Snx9, Tfrc, Vamp2                                                                                                                                                                                                                                                                                |
| Signaling by NTRKs                                             | Ap2a1, Ap2a2, Ap2b1, Ap2m1, Ap2s1, Cltc, Crk, Fyn, Grb2, Kras, Map2k1, Mapk1, Mapk3, Ntrk3, Pik3r1, Plcg1, Ppp2ca, Ppp2r1a, Rac1, Sh3gl2, Sos1, Src, Ywhab                                                                                                                                                                                                                                                                          |
| Protein-protein interactions at synapses                       | Cask, Dlg1, Dlg2, Dlg3, Dlg4, Dlgap1, Dlgap2, Dlgap3, Dlgap4, Epb41, Epb41l2, Epb41l3, Flot1, Flot2, Gria1, Gria4, Grin1, Grin2a, Grin2b, Grm1, Grm5, Homer1, Homer2, Homer3, Lrnf4, Lrrc4b, Lrrtm1, Lrrtm4, Nlgn2, Nlgn3, Nrnx1, Nrnx3, Ntrk3, Ppfia1, Ppfia2, Ppfia3, Ppfia4, Ptprd, Ptprs, Rtn3, Sh3glb2, Shank1, Shank2, Shank3                                                                                                 |
| Unblocking of NMDA receptors, glutamate binding and activation | Calm2, Camk2a, Camk2b, Camk2d, Dlg1, Dlg2, Dlg3, Dlg4, Gria1, Gria4, Grin1, Grin2a, Grin2b, Lrrc7, Neff                                                                                                                                                                                                                                                                                                                             |

Table S10: GSEA enriched Reactome pathways for proteins ranked by  $\pi(\text{TW}/\text{EW})$

| Enriched pathway                          | FDR-adjusted<br>p-value | Normalized<br>enrichment<br>score | Number of<br>genes |
|-------------------------------------------|-------------------------|-----------------------------------|--------------------|
| Metabolism of amino acids and derivatives | 0.0351                  | -1.7100                           | 81                 |
| Extracellular matrix organization         | 0.0363                  | -1.9221                           | 21                 |
| Chaperonin-mediated protein folding       | 0.0351                  | -1.9759                           | 20                 |
| GPCR ligand binding                       | 0.0351                  | -1.9915                           | 21                 |

Table S11: Genes of enriched Reactome pathways for GSEA of proteins ranked by  $\pi(\text{TW}/\text{EW})$

| Enriched pathway                          | Genes                                                                                                                                                                                                                                                                                                                                                                                                                                                                                                                                                                   |
|-------------------------------------------|-------------------------------------------------------------------------------------------------------------------------------------------------------------------------------------------------------------------------------------------------------------------------------------------------------------------------------------------------------------------------------------------------------------------------------------------------------------------------------------------------------------------------------------------------------------------------|
| Metabolism of amino acids and derivatives | Acad8, Acadsb, Acat1, Ado, Ahcy, Aldh18a1, Aldh6a1, Aldh7a1, Asrgl1, Ass1, Auh, Bckdk, Ckb, Ckmt1, Crym, Dbt, Ddc, Dlat, Dld, Dlst, Echsl, Gcdh, Gls, Glud1, Glul, Got1, Got2, Gstz1, Hibch, Ivd, Mccc1, Mccc2, Mpst, Nmrall, Oat, Ogdh, Pdha1, Pdhh, Pdhx, Phgdh, Psat1, Psma1, Psma2, Psma3, Psma4, Psma5, Psma6, Psma7, Psmb1, Psmb2, Psmb4, Psmb5, Psmb6, Psmc1, Psmc2, Psmc3, Psmc4, Psmc5, Psmc6, Psmd1, Psmd11, Psmd13, Psmd14, Psmd2, Psmd3, Psmd4, Psmd5, Psmd6, Psmd7, Psmd8, Psmd9, Pycr2, Qdpr, Rida, Slc25a10, Slc25a12, Slc3a2, Slc6a11, Srm, Tst, Txnrd1 |
| Extracellular matrix organization         | Acan, Adam10, App, Bcan, Capn5, Cd47, Ctsd, Fga, Hapln1, Icam5, Jam3, Lum, Matn4, Ncan, P4hb, Plg, Prkca, Prss1, Serpinh1, Tnc, Tnr                                                                                                                                                                                                                                                                                                                                                                                                                                     |
| Chaperonin-mediated protein folding       | Cct2, Cct3, Cct4, Cct5, Cct6a, Cct7, Cct8, Gna11, Gnaq, Gnb2, Gnb5, Gng10, Gng12, Gng13, Gng2, Gng5, Pdcl, Rgs6, Rgs7, Tcp1                                                                                                                                                                                                                                                                                                                                                                                                                                             |
| GPCR ligand binding                       | App, Cck, Gabbr1, Gabbr2, Gnb2, Gnb5, Gng10, Gng12, Gng13, Gng2, Gng5, Grm1, Grm2, Grm3, Grm5, Grm7, Nln, Plppr3, Plppr4, Rln3, Sst                                                                                                                                                                                                                                                                                                                                                                                                                                     |

Table S12: GSEA enriched Reactome pathways for proteins ranked by  $\pi(\text{EF}/\text{EW})$

| Enriched pathway                                              | FDR-adjusted p-value | Normalized enrichment score | Number of genes |
|---------------------------------------------------------------|----------------------|-----------------------------|-----------------|
| Metabolism of RNA                                             | 0.0404               | -1.6270                     | 173             |
| HSF1-dependent transactivation                                | 0.0404               | -1.6292                     | 11              |
| Major pathway of rRNA processing in the nucleolus and cytosol | 0.0404               | -1.7048                     | 61              |

Table S13: Genes of enriched Reactome pathways for GSEA of proteins ranked by  $\pi(\text{EF}/\text{EW})$

| Enriched pathway                                              | Genes                                                                                                                                                                                                                                                                                                                                                                                                                                                                                                                                                                                                                                                                                                                                                                                                                                                                                                                                                                                                                                                                                                                                                                                                                                                                              |
|---------------------------------------------------------------|------------------------------------------------------------------------------------------------------------------------------------------------------------------------------------------------------------------------------------------------------------------------------------------------------------------------------------------------------------------------------------------------------------------------------------------------------------------------------------------------------------------------------------------------------------------------------------------------------------------------------------------------------------------------------------------------------------------------------------------------------------------------------------------------------------------------------------------------------------------------------------------------------------------------------------------------------------------------------------------------------------------------------------------------------------------------------------------------------------------------------------------------------------------------------------------------------------------------------------------------------------------------------------|
| Metabolism of RNA                                             | Alyref, Bcas2, Cdc5l, Cherp, Cnot1, Cnot3, Cnot9, Cpsf7, Csnk1e, Cstf2, Ddx39b, Ddx46, Ddx6, Dhx15, Dhx9, Edc4, Eif4a2, Eif4a3, Eif4b, Eif4e, Eif4g1, Elavl1, Gemin5, Heatr1, Hnrnpa1, Hnrnpa2b1, Hnrnpa3, Hnrnpc, Hnrnpd, Hnrnpf, Hnrnph1, Hnrnpk, Hnrnpl, Hnrnpu, Hspa1b, Hspa8, Hspb1, Ik, Khgrp, Lsm3, Lsm6, Lsm7, Ncl, Nop56, Nup93, Nup98, Pabpc1, Pcbp1, Pnn, Poldip3, Polr2a, Ppp2ca, Ppp2r1a, Ppp2r2a, Prkca, Prpf19, Prpf8, Psma1, Psma2, Psma3, Psma4, Psma5, Psma6, Psma7, Psmb1, Psmb2, Psmb4, Psmb5, Psmb6, Psmc1, Psmc2, Psmc3, Psmc4, Psmc5, Psmc6, Psmd1, Psmd11, Psmd13, Psmd14, Psmd2, Psmd3, Psmd4, Psmd5, Psmd6, Psmd7, Psmd8, Psmd9, Ranbp2, Rpl11, Rpl12, Rpl13, Rpl13a, Rpl14, Rpl15, Rpl18, Rpl18a, Rpl19, Rpl21, Rpl22, Rpl22l1, Rpl23, Rpl23a, Rpl24, Rpl26, Rpl27, Rpl27a, Rpl28, Rpl29, Rpl3, Rpl30, Rpl31, Rpl34, Rpl35, Rpl35a, Rpl37, Rpl37a, Rpl4, Rpl5, Rpl6, Rpl7, Rpl8, Rplp0, Rplp2, Rps11, Rps13, Rps14, Rps15a, Rps16, Rps17, Rps19, Rps2, Rps21, Rps23, Rps25, Rps27a, Rps28, Rps3, Rps4x, Rps5, Rps6, Rps7, Rps8, Rps9, Rpsa, Sarnp, Set, Sf3a1, Sf3a3, Sf3b2, Sf3b3, Snrnp70, Snrpa, Snrpa1, Snrpd1, Snrpd3, Snrpe, Snu13, Srrm2, Srsf1, Srsf2, Srsf3, Srsf7, Tcerg1, Tnks1bp1, Tnpo1, Tpr, Upf1, Wbp11, Xpo1, Xrn2, Ywhab, Ywhaz, Zmat2 |
| HSF1-dependent transactivation                                | Camk2a, Camk2b, Camk2d, Cryab, Dnajb1, Hsp90aa1, Hsp90ab1, Hspa1b, Hspa8, Mtor, Ptges3                                                                                                                                                                                                                                                                                                                                                                                                                                                                                                                                                                                                                                                                                                                                                                                                                                                                                                                                                                                                                                                                                                                                                                                             |
| Major pathway of rRNA processing in the nucleolus and cytosol | Csnk1e, Heatr1, Ncl, Nop56, Rpl11, Rpl12, Rpl13, Rpl13a, Rpl14, Rpl15, Rpl18, Rpl18a, Rpl19, Rpl21, Rpl22, Rpl22l1, Rpl23, Rpl23a, Rpl24, Rpl26, Rpl27, Rpl27a, Rpl28, Rpl29, Rpl3, Rpl30, Rpl31, Rpl34, Rpl35, Rpl35a, Rpl37, Rpl37a, Rpl4, Rpl5, Rpl6, Rpl7, Rpl8, Rplp0, Rplp2, Rps11, Rps13, Rps14, Rps15a, Rps16, Rps17, Rps19, Rps2, Rps21, Rps23, Rps25, Rps28, Rps3, Rps4x, Rps5, Rps6, Rps7, Rps8, Rps9, Rpsa, Snu13, Xrn2                                                                                                                                                                                                                                                                                                                                                                                                                                                                                                                                                                                                                                                                                                                                                                                                                                                |
